# Supplementary material for: Time, Ritual, and Bayesian Reasoning: Charting the Andean Kotosh Religious Tradition
Source: Research Square preprint supplement (doi:10.21203/rs.3.rs-6896121/v1), 2025-07-18
Supplement: Supplementary file 1 [file 2482946ded5f8f5ed4568d3a.xlsx]

## Sheet: Model A
Name	Unmodelled (BCE/CE)			Modelled (BCE/CE)			Indices_x000D_ Amodel 58.9_x000D_ Aoverall 68.4
	median	from_95_4	to_95_4	median	from_95_4	to_95_4	Acomb	A	L	P	C
Outlier_Model General				-1	-6	8					100
T(5)	2.04945e-12	-2.65	2.65	-1.81643e-13							99.6
U(0.4,0)	0.2	1.92446e-18	0.4	0.2	-1.54499e-18	0.4		100			100
Curve SHCal13
Order
Sequence Kotosh Religious Tradition
Boundary Start Kotosh Religious Tradition				-3399	-3783	-3141					96.8
Phase Kotosh Religious Tradition
Sequence
Boundary Start Huaricanga				-3244	-3556	-3064					99.7
KDE_Plot Huaricanga				-2501							100
N Huaricanga_Kernel	-8.26223e-14	-2	2	-7.81814e-14	-2.01	2		100			99.9
U Huaricanga_Scale	0.5	9.97466e-18	1	0.58	0.275	1		100			99.9
R_Date AA102184	-3453	-3639	-3120	-3158	-3490	-3022		34.4		95	99.6
R_Date AA102185	-3062	-3340	-2892	-3028	-3306	-2885		107			99.9
R_Date AA102179	-3010	-3336	-2877	-2996	-3310	-2873		107.3			99.9
R_Date AA84560	-2506	-2623	-2340	-2506	-2622	-2341		100			99.9
R_Date AA102181	-2388	-2561	-2211	-2396	-2565	-2231		103			99.9
R_Date AA102180	-2391	-2548	-2215	-2396	-2556	-2282		102.2			99.9
R_Date AA10282	-2380	-2476	-2210	-2387	-2481	-2232		103			99.9
R_Date AA84551	-2366	-2475	-2206	-2379	-2477	-2211		104.3			99.9
R_Date AA84552	-2331	-2469	-2155	-2356	-2467	-2212		103.2			99.9
Boundary End Huaricanga				-2212	-2391	-1853					99.4
Sequence
Boundary Start Huaricoto				-3252	-3602	-2972					99.7
KDE_Plot Huaricoto				-2302							100
N Huaricoto_Kernel	-8.26223e-14	-2	2	-7.81814e-14	-2	2.01		100			99.9
U Huaricoto_Scale	0.5	9.97466e-18	1	0.411	0.113	0.901		100			99.9
R_Date PUCP-XX1	-2738	-3094	-2351	-2736	-3088	-2458		101			99.8
R_Date II11142	-2414	-2860	-2050	-2414	-2860	-2050		99.9			99.8
R_Date I-11152	-2334	-2832	-1980	-2334	-2831	-1980		100			99.8
R_Date Tx-3580	-3264	-3708	-2780	-3069	-3436	-2676		94.9			99.8
R_Date Tx-3581	-3476	-3947	-2935	-3109	-3501	-2765		61.7			99.7
R_Date Tx-3582	-617	-919	-259	-662	-907	-392		102.6			99.8
R_Date Tx-3583	-353	-747	-113	-499	-766	-252		64.8			99.8
R_Date I-11151	-328	-751	-59	-529	-781	-256		67.6			99.8
Boundary End Huaricoto				-378	-702	-111					99.9
Sequence
Boundary Start Huaynuna				-2699	-3023	-2484					99.5
KDE_Plot Huaynuna				-2043							100
N Huaynuna_Kernel	-8.26223e-14	-2	2	-7.81814e-14	-2.01	2		100.1			99.9
U Huaynuna_Scale	0.5	9.97466e-18	1	0.712	0.33	1		100			99.9
R_Date UGa-4522	-2733	-2909	-2492	-2609	-2856	-2466		75.8			99.8
R_Date UGa-5616	-2645	-3340	-2033	-2452	-2840	-1971		101.9			99.8
R_Date UGa-4520	-2527	-2856	-2296	-2506	-2686	-2289		105.7			99.8
R_Date UGa-5619	-2223	-2456	-2037	-2223	-2455	-2037		99.9			99.9
R_Date UGa-5612	-2191	-2456	-1983	-2191	-2454	-1984		100			99.9
R_Date UGa-4521	-2074	-2334	-1785	-2074	-2334	-1828		100.1			99.8
R_Date UGa-5631	-2022	-2205	-1783	-2022	-2205	-1786		100.1			99.9
R_Date UGa-5617	-1901	-2109	-1744	-1904	-2036	-1746		101			99.9
R_Date UGa-5613	-1904	-2197	-1640	-1917	-2198	-1687		103.3			99.9
R_Date UGa-5615	-1875	-2135	-1643	-1890	-2136	-1689		103.3			99.8
R_Date UGa-5614	-1851	-2020	-1695	-1860	-2021	-1701		101.4			99.9
R_Date UGa-5618	-1791	-2027	-1534	-1831	-2033	-1629		104.3			99.9
R_Date UGa-5632	-1714	-1888	-1531	-1772	-1919	-1617		94.1			99.9
Boundary End Huaynuna				-1672	-1856	-1415					99.5
Sequence
Boundary Start Piruro				-2608	-3073	-2262					99.5
KDE_Plot Piruro				-1839							100
N Piruro_Kernel	-8.26223e-14	-2	2	-7.81814e-14	-2	2		100			99.9
U Piruro_Scale	0.5	9.97466e-18	1	0.81	0.457	1		100			99.9
R_Date LV-498	-1236	-1489	-980	-1238	-1490	-993		100.6			99.8
R_Date LV-495	-1753	-1950	-1530	-1753	-1949	-1530		99.9			99.8
R_Date Gif-2302	-2362	-2859	-1979	-2312	-2622	-1968		105.4			99.8
R_Date Gif-2304/5	-2505	-2882	-2142	-2387	-2744	-2037		98.7			99.8
R_Date Gif-2304/7	-2536	-3321	-1893	-2329	-2835	-1831		99.3			99.7
R_Date Gif-2305	-2295	-2834	-1912	-2263	-2576	-1926		104.3			99.9
R_Date LV-494	-1753	-1965	-1521	-1753	-1964	-1521		99.9			99.8
R_Date Gif-7099	-869	-1046	-767	-912	-1115	-792		79.4			99.8
R_Date Gif-7100	-1463	-1628	-1277	-1463	-1628	-1277		100			99.9
R_Date Gif-7101	-1372	-1599	-1131	-1372	-1598	-1131		100			99.9
R_Date Gif-7102	-1901	-2133	-1693	-1901	-2132	-1693		100			99.9
R_Date Gif-7103	-1485	-1658	-1296	-1485	-1657	-1296		99.9			99.9
R_Date Gif-7104	-2426	-3364	-1545	-2199	-2765	-1511		107.5			99.7
R_Date Gif-7266	-2130	-2338	-1941	-2129	-2337	-1942		100.3			99.9
Boundary End Piruro				-822	-1094	-488					99.8
Sequence
Boundary Start Acshicupoto				-2762	-2976	-2620					99.2
KDE_Plot Acshicupoto				-2614							99.9
N Acshicupoto_Kernel	-8.26223e-14	-2	2	-7.81814e-14	-2	2		100			99.9
U Acshicupoto_Scale	0.5	9.97466e-18	1	0.77	0.374	1		100			99.9
R_Date PRI-14-108-71	-2775	-2892	-2636	-2704	-2877	-2583		74.9			99.7
R_Date D-AMS 021271	-2690	-2871	-2506	-2650	-2856	-2502		103.3			99.9
R_Date D-AMS 014375	-2670	-2866	-2500	-2639	-2851	-2500		105.3			99.9
R_Date D-AMS 014376	-2678	-2866	-2504	-2645	-2855	-2501		104.3			99.9
R_Date D-AMS 021270	-2644	-2864	-2492	-2623	-2842	-2493		107.4			99.9
R_Date Beta - 423709	-2591	-2851	-2475	-2590	-2833	-2479		105.2			99.9
R_Date Beta - 423708	-2531	-2624	-2463	-2545	-2621	-2470		99.5			99.8
R_Date D-AMS 021269	-2419	-2566	-2296	-2525	-2578	-2364		75			99.7
Boundary End Acshicupoto				-2464	-2571	-2272					98.3
Sequence
Boundary Start Shillacoto				-1765	-3140	-1259					99.5
KDE_Plot Shillacoto				-2							100
N Shillacoto_Kernel	-8.26223e-14	-2	2	0.76	-5.15	4.25		35.3
U Shillacoto_Scale	0.5	9.97466e-18	1	0.526	0.13	1		100
R_Date TK-43	-1425	-1622	-1219	-1427	-1621	-1221		100			99.9
Boundary End Shillacoto				-1137	-1569	-363					99.8
Sequence
Boundary Start Hualcayan				-2487	-3160	-2208					99.8
KDE_Plot Hualcayan				-1759							100
N Hualcayan_Kernel	-8.26223e-14	-2	2	-7.81814e-14	-2	2		100.1			99.9
U Hualcayan_Scale	0.5	9.97466e-18	1	0.791	0.459	1		100			99.9
R_Date D-AMS 008213	-1289	-1402	-1209	-1303	-1402	-1216		99.1			99.9
R_Date D-AMS 008215	-1523	-1613	-1448	-1523	-1612	-1448		99.4			99.9
R_Date D-AMS 015768	-1967	-2134	-1783	-1967	-2134	-1783		99.9			99.9
R_Date D-AMS 008216	-2309	-2458	-2204	-2290	-2454	-2200		101.7			99.9
Boundary End Hualcayan				-1125	-1386	-516					99.8
Sequence
Boundary Start Caral				-2602	-2726	-2501					99.4
KDE_Plot Caral				-2317							100
N Caral_Kernel	-8.26223e-14	-2	2	-7.81814e-14	-2	2.01		100			99.9
U Caral_Scale	0.5	9.97466e-18	1	0.621	0.279	1		100			99.9
R_Date Beta-132593	-1956	-2134	-1773	-2028	-2142	-1911		81.5			99.8
R_Date ISGS-4724	-2079	-2291	-1886	-2109	-2295	-1941		104.8			99.9
R_Date Beta-134427	-2096	-2454	-1783	-2131	-2437	-1940		105.8			99.9
R_Date ISGS-4738	-2093	-2401	-1880	-2124	-2396	-1939		105.2			99.9
R_Date ISGS-4740	-2193	-2458	-1981	-2199	-2457	-2026		102.2			99.9
R_Date Beta-132589	-2207	-2456	-2030	-2211	-2454	-2033		101.3			99.9
R_Date ISGS-4710	-2241	-2463	-2036	-2244	-2463	-2040		101.3			99.9
R_Date GS-4726	-2326	-2562	-2061	-2325	-2556	-2062		100.7			99.9
R_Date ISGS-4727	-2400	-2857	-2043	-2375	-2611	-2059		109.5			99.9
R_Date ISGS-4733	-2396	-2625	-2141	-2387	-2578	-2148		104.3			99.9
R_Date ISGS-4734	-2411	-2847	-2137	-2394	-2590	-2143		107.1			99.9
R_Date Beta-134429	-2411	-2570	-2286	-2410	-2568	-2286		100.6			99.9
R_Date ISGS-4729	-2441	-2832	-2204	-2427	-2583	-2207		105.3			99.9
R_Date ISGS-4732	-2441	-2832	-2204	-2426	-2583	-2207		105.3			99.9
R_Date Beta-134428	-2501	-2620	-2340	-2492	-2581	-2340		101			99.9
R_Date ISGS-4736	-2555	-2865	-2308	-2507	-2634	-2300		114.3			99.9
R_Date ISGS-4711	-2606	-2880	-2346	-2508	-2661	-2291		102.2			99.8
R_Date Beta-184980	-1943	-2141	-1704	-2047	-2199	-1910		83			99.9
R_Date Beta-184982	-2030	-2400	-1695	-2115	-2442	-1917		103.2			99.9
R_Date Beta-184984	-2036	-2271	-1881	-2085	-2272	-1933		102.6			99.9
R_Date Beta-184979	-2178	-2456	-1974	-2185	-2456	-2015		102.6			99.9
R_Date Beta-184981	-2226	-2462	-2031	-2229	-2457	-2039		101.6			99.9
R_Date Beta-184977	-2441	-2832	-2204	-2426	-2583	-2207		105.2			99.9
R_Date Beta-184983	-2528	-2866	-2236	-2484	-2634	-2215		112.2			99.9
R_Date Beta-184985	-2555	-2865	-2308	-2507	-2634	-2301		114.4			99.9
R_Date Beta-184973	-2700	-2885	-2491	-2538	-2686	-2461		68.5			99.8
Boundary End Caral				-1973	-2102	-1854					98.8
Sequence
Boundary Start Kotosh				-2379	-3091	-1928					99.3
KDE_Plot Kotosh				-1911							100
N Kotosh_Kernel	-8.26223e-14	-2	2	-7.81814e-14	-2	2		100			99.9
U Kotosh_Scale	0.5	9.97466e-18	1	0.787	0.394	1		100			99.9
R_Date TK-109	-1618	-2034	-1214	-1745	-2127	-1396		93.6			99.8
R_Date TK-110	-1740	-1942	-1527	-1775	-2007	-1544		98.8			99.9
R_Date GaK-766a	-1932	-2205	-1659	-1931	-2199	-1688		103.8			99.8
R_Date GaK-766b	-2321	-2617	-1985	-2205	-2488	-1909		83.1			99.8
R_Date TK-42	-2448	-4781	-359	-1965	-2699	-1289		127.7			99.9
Boundary End Kotosh				-1532	-1926	-811					99.5
Sequence
Boundary Start La Galgada				-2627	-2991	-2429					99.7
KDE_Plot La Galgada				-1948							100
N La Galgada_Kernel	-8.26223e-14	-2	2	-7.81814e-14	-2	2		100			99.9
U La Galgada_Scale	0.5	9.97466e-18	1	0.867	0.552	1		100			99.9
R_Date TX4450	-2212	-2476	-1926	-2210	-2476	-1934		100.5			99.8
R_Date TX3167	-2207	-2456	-2030	-2207	-2456	-2029		100.1			99.9
R_Date TK4449	-2163	-2453	-1949	-2163	-2451	-1950		100.1			99.9
R_Date TK4448	-1970	-2141	-1771	-1970	-2141	-1771		99.9			99.9
R_Date UGa4583	-1887	-2133	-1687	-1887	-2132	-1687		100			99.9
R_Date TX-2463	-1741	-1961	-1505	-1742	-1962	-1508		100.4			99.8
R_Date TX-2464	-1702	-1907	-1502	-1704	-1903	-1504		100.5			99.9
R_Date TX-3166	-1985	-2204	-1747	-1984	-2204	-1748		100			99.9
R_Date TX-3663	-1821	-1962	-1683	-1821	-1962	-1682		100			99.9
R_Date TX-3664	-2622	-2865	-2472	-2536	-2831	-2348		100.9			99.9
R_Date TX-4446	-1335	-1530	-1110	-1424	-1623	-1231		84.1			99.8
R_Date TX-4447	-1997	-2201	-1772	-1997	-2201	-1772		99.9			99.8
R_Date TX-5606	-1580	-2292	-901	-1692	-2337	-1230		107.9			99.8
Boundary End La Galgada				-1336	-1606	-996					99.6
Sequence
Boundary Start Pampa de las Llamas				-3124	-3365	-2921					99.7
KDE_Plot Pampa de las Llamas				-1588							100
N Pampa de las Llamas_Kernel	-8.26223e-14	-2	2	-7.81814e-14	-2	2.01		99.9			99.9
U Pampa de las Llamas_Scale	0.5	9.97466e-18	1	0.965	0.859	1		100			99.8
R_Date UGa-4510	-3368	-3635	-3031	-3049	-3245	-2897		43.2		95	99.1
R_Date UGa-5796	-2101	-2451	-1881	-2101	-2452	-1880		99.9			99.8
R_Date UGa-4505	-2086	-2339	-1882	-2086	-2339	-1882		100			99.8
R_Date UGa-5461	-1802	-2011	-1622	-1802	-2011	-1622		99.9			99.9
R_Date UGa-5462	-1797	-2009	-1618	-1796	-2009	-1618		99.8			99.9
R_Date UGa-5801	-1772	-2012	-1532	-1772	-2012	-1533		100			99.8
R_Date UGa-4506	-1765	-1955	-1534	-1765	-1955	-1535		99.9			99.8
R_Date UGa-5799	-1731	-1893	-1561	-1731	-1894	-1561		99.9			99.9
R_Date UGa-4508	-1682	-1885	-1503	-1682	-1886	-1503		100			99.8
R_Date UGa-4507	-1654	-2035	-1273	-1657	-2028	-1298		101			99.8
R_Date UGa-5800	-1582	-1737	-1449	-1581	-1737	-1448		99.9			99.9
R_Date UGa-4509	-1563	-1862	-1318	-1564	-1862	-1320		100.1			99.8
R_Date UGa-5611	-1551	-1739	-1408	-1551	-1739	-1408		100			99.9
R_Date UGa-5610	-1504	-1631	-1403	-1504	-1630	-1404		100			99.9
R_Date UGa-5795	-1478	-1622	-1308	-1479	-1622	-1309		99.9			99.9
R_Date UGa-5609	-1463	-1617	-1297	-1464	-1616	-1300		100.5			99.9
R_Date UGa-5797	-1452	-1612	-1292	-1453	-1612	-1297		100.7			99.9
R_Date UGa-5630	-1416	-1605	-1232	-1418	-1605	-1260		101.6			99.9
R_Date UGa-5794	-1409	-1600	-1228	-1412	-1601	-1236		101.8			99.9
R_Date UGa-4511	-1390	-1618	-1128	-1403	-1616	-1216		105.5			99.9
R_Date UGa-4503	-1378	-1607	-1131	-1389	-1604	-1216		104.4			99.9
R_Date UGa-5798	-1369	-1609	-1128	-1387	-1609	-1211		106			99.9
R_Date UGa-5873	-1326	-1415	-1223	-1337	-1416	-1232		102.9			99.9
R_Date UGa-4504	-1264	-1492	-1015	-1326	-1497	-1133		107.8			99.9
Boundary End Pampa de las Llamas				-1202	-1349	-957					99.7
Sequence
Boundary Start Buena Vista				-2148	-2486	-1921					99.1
KDE_Plot Buena				-1784							100
N Buena_Kernel	-8.26223e-14	-2	2	-7.81814e-14	-2	2.01		100.1			99.9
U Buena_Scale	0.5	9.97466e-18	1	0.709	0.323	1		100			99.9
R_Date PI-1845	-1638	-1876	-1453	-1679	-1878	-1529		100.1			99.9
R_Date UGAMS- 3129	-1671	-1753	-1562	-1678	-1753	-1612		101.3			99.9
R_Date UGAMS- 3126	-1671	-1753	-1562	-1677	-1753	-1612		101.4			99.9
R_Date UGAMS- 3127	-1706	-1870	-1621	-1709	-1870	-1623		101.2			99.9
R_Date UGAMS- 3128	-1806	-1890	-1693	-1806	-1891	-1693		99.7			99.9
R_Date GX-30695	-1901	-2109	-1744	-1898	-2032	-1746		101.1			99.9
R_Date GX-31276	-2135	-2452	-1907	-2041	-2274	-1786		94.1			99.8
R_Date GX-32177	-2165	-2457	-1947	-2050	-2288	-1881		88.9			99.8
Boundary End Buena Vista				-1586	-1714	-1331					99.5
Sequence
Boundary Start El Paraiso				-1916	-2244	-1709					99.1
KDE_Plot El Paraiso				-1662							100
N El Paraiso_Kernel	-8.26223e-14	-2	2	-7.81814e-14	-2.01	2		100			99.9
U El Paraiso_Scale	0.5	9.97466e-18	1	0.682	0.295	1		100			99.9
R_Date Beta-8704	-1198	-1394	-1014	-1283	-1423	-1111		87.2			99.9
R_Date P-1209	-1264	-1425	-1056	-1319	-1435	-1131		103.6			99.9
R_Date JQ02	-1671	-1747	-1613	-1670	-1746	-1613		99.9			99.9
R_Date P-1210	-1606	-1751	-1451	-1605	-1749	-1452		100.5			99.9
R_Date P-1214	-1705	-1882	-1534	-1697	-1876	-1533		103			99.9
R_Date JQ10	-1712	-1869	-1626	-1710	-1862	-1626		101.3			99.9
R_Date I-13276	-1850	-2141	-1611	-1776	-2012	-1545		102.5			99.9
R_Date I-13275	-1838	-2136	-1565	-1771	-1981	-1534		103.4			99.8
R_Date I-1676	-1875	-2292	-1500	-1752	-2027	-1456		104.2			99.8
Boundary End El Paraiso				-1192	-1389	-896					99.6
Sequence
Boundary Start Bahia Seca				-1600	-1965	-1436					98.3
KDE_Plot Bahia Seca				-1485							99.8
N Bahia Seca_Kernel	-8.26223e-14	-2	2	-7.81814e-14	-2	2.01		100			99.9
U Bahia Seca_Scale	0.5	9.97466e-18	1	0.804	0.417	1		100			99.9
R_Date UGa-6129	-1593	-1744	-1448	-1532	-1671	-1428		89.7			99.7
R_Date UGa-6023	-1516	-1659	-1406	-1498	-1616	-1414		107.9			99.9
R_Date UGa-6025	-1474	-1624	-1302	-1478	-1615	-1326		114.4			99.9
R_Date UGa-6022	-1368	-1501	-1225	-1433	-1531	-1280		85.1			99.8
Boundary End Bahia Seca				-1378	-1528	-1001					99.2
Sequence
Boundary Start Taukachi-Konkan				-1690	-1860	-1516					97.4
KDE_Plot Taukachi-Konkan				-1440							100
N Taukachi-Konkan_Kernel	-8.26223e-14	-2	2	-7.81814e-14	-2	2.01		100			99.9
U Taukachi-Konkan_Scale	0.5	9.97466e-18	1	0.808	0.409	1		100			99.9
R_Date UGa-7037	-1812	-1946	-1665	-1660	-1807	-1504		35.9			98.3
R_Date UGa-7040	-1501	-1613	-1422	-1497	-1610	-1421		102.4		90	99.9
R_Date UGa-7041	-1625	-1871	-1447	-1570	-1731	-1441		101.4			99.5
R_Date UGa-7042	-1331	-1496	-1130	-1368	-1496	-1233		107.1			99.9
R_Date UGa-7038	-1335	-1450	-1208	-1363	-1447	-1236		105.1			99.9
R_Date UGa-7039	-1174	-1369	-1029	-1304	-1406	-1167		44.5		95	99.6
R_Date Beta-535191	-1476	-1607	-1411	-1476	-1601	-1411		101.3			99.9
R_Date Beta-427589	-1454	-1528	-1323	-1454	-1527	-1327		100.7			99.9
R_Date Beta-427588	-1445	-1515	-1310	-1445	-1517	-1318		101.1			99.9
R_Date Beta-427587	-1434	-1506	-1305	-1435	-1506	-1309		101.6			99.9
R_Date Beta-535190	-1398	-1496	-1287	-1404	-1496	-1299		102.3			99.9
R_Date Beta-535192	-1423	-1502	-1303	-1425	-1502	-1306		102.3			99.9
R_Date Beta-477229	-1351	-1441	-1261	-1373	-1441	-1276		102			99.9
R_Date Beta-477227	-1470	-1602	-1402	-1469	-1599	-1401		100.9			99.9
R_Date Beta- 477228	-1454	-1528	-1323	-1454	-1527	-1327		100.7			99.9
Boundary End Taukachi-Konkan				-1264	-1386	-1110					99
Sequence
Boundary Start Huacaloma				-1434	-2652	-1016					99.3
KDE_Plot Huacaloma				-1143							100
N Huacaloma_Kernel	-8.26223e-14	-2	2	-7.81814e-14	-2.01	2		100			99
U Huacaloma_Scale	0.5	9.97466e-18	1	0.52	0.055	1		100			97.4
R_Date TK341a	-1281	-1441	-1055	-1236	-1421	-1026		91.3			99.9
R_Date TK409	-972	-1209	-804	-1039	-1261	-821		85.8			99.9
Boundary End Huacaloma				-867	-1241	-335					99.8
Sequence
Boundary Start Gramalote				-1401	-1811	-1237					98.9
KDE_Plot Gramalote				-1321							99.9
N Gramalote_Kernel	-8.26223e-14	-2	2	-7.81814e-14	-2	2.01		100.1			99.9
U Gramalote_Scale	0.5	9.97466e-18	1	0.818	0.522	1		100			99.9
R_Date Beta-321940	-1291	-1414	-1130	-1311	-1411	-1211		107.7			99.9
R_Date Beta-321943	-1351	-1489	-1230	-1333	-1431	-1233		101.6			99.8
R_Date Beta-321945	-1291	-1414	-1130	-1311	-1411	-1211		107.7			99.9
Boundary End Gramalote				-1240	-1399	-854					99.5
Sequence
Boundary Start Chavin				-873	-1203	-773					98.9
KDE_Plot Chavin				-770							99.9
N Chavin_Kernel	-8.26223e-14	-2	2	-7.81814e-14	-2	2.01		100.1			99.9
U Chavin_Scale	0.5	9.97466e-18	1	0.788	0.372	1		100			99.9
R_Date AA69448	-604	-764	-416	-719	-797	-530		97.1			99.9
R_Date AA69449	-646	-802	-490	-744	-803	-565		106.2			99.9
R_Date AA69446	-786	-895	-546	-790	-888	-562		118.2			99.9
R_Date AA69447	-836	-918	-788	-819	-899	-775		107.3			99.9
Boundary End Chavin				-630	-788	-367					99.7
Boundary End Kotosh Religious Tradition				-296	-647	62					98.4

## Sheet: Model B
Name	Unmodelled (BCE/CE)			Modelled (BCE/CE)			Indices_x000D_ Amodel 32_x000D_ Aoverall 44
	median	from_95_4	to_95_4	median	from_95_4	to_95_4	Acomb	A	L	P	C
Outlier_Model General				-1	-6	8					100
T(5)	2.04945e-12	-2.65	2.65	0.06							99.6
U(0.4,0)	0.2	1.92446e-18	0.4	0.2004	0.0032	0.4		100			100
Curve SHCal13
Order
Sequence Kotosh Religious Tradition
Boundary Start Kotosh Religious Tradition				-3248	-3577	-3034					98.8
Phase Kotosh Religious Tradition
Sequence
Boundary Start Huaricanga				-3175	-3428	-2981					99.8
KDE_Plot Huaricanga				-2493							100
N Huaricanga_Kernel	-8.26223e-14	-2	2	-7.81814e-14	-2	2		100			99.9
U Huaricanga_Scale	0.5	9.97466e-18	1	0.53	0.221	0.976		100			99.9
R_Date AA102184	-3453	-3639	-3120	-3133	-3404	-2924		18.3		95	99.6
R_Date AA102185	-3062	-3340	-2892	-3009	-3261	-2879		111.3			99.9
R_Date AA102179	-3010	-3336	-2877	-2987	-3262	-2778		112			99.9
R_Date AA84560	-2506	-2623	-2340	-2506	-2622	-2342		100.2			99.9
R_Date AA102181	-2388	-2561	-2211	-2396	-2564	-2234		103.3			99.9
R_Date AA102180	-2391	-2548	-2215	-2397	-2553	-2282		102.4			99.9
R_Date AA10282	-2380	-2476	-2210	-2388	-2479	-2234		103.3			99.9
R_Date AA84551	-2366	-2475	-2206	-2380	-2479	-2211		104.5			99.9
R_Date AA84552	-2331	-2469	-2155	-2359	-2468	-2213		103.3			99.9
Boundary End Huaricanga				-2221	-2394	-1890					99.5
Sequence
Boundary Start Huaricoto				-987	-3029	-322					98.9
KDE_Plot Huaricoto				-2							100
N Huaricoto_Kernel	-8.26223e-14	-2	2	-2.72	-5.05	4.05		21.5
U Huaricoto_Scale	0.5	9.97466e-18	1	0.601	0.02	0.97		100
R_Date Tx-3583	-353	-747	-113	-657	-786	-279		43.1		95	99.7
Boundary End Huaricoto				-551	-756	-199					99.6
Sequence
Boundary Start Huaynuna				-2698	-3032	-2484					99.7
KDE_Plot Huaynuna				-2031							100
N Huaynuna_Kernel	-8.26223e-14	-2	2	-7.81814e-14	-2	2		100			99.9
U Huaynuna_Scale	0.5	9.97466e-18	1	0.742	0.338	1		100			99.9
R_Date UGa-4522	-2733	-2909	-2492	-2608	-2858	-2465		75.4			99.8
R_Date UGa-4520	-2527	-2856	-2296	-2506	-2687	-2288		105.5			99.9
R_Date UGa-5619	-2223	-2456	-2037	-2223	-2454	-2037		99.8			99.9
R_Date UGa-5612	-2191	-2456	-1983	-2191	-2454	-1984		99.9			99.8
R_Date UGa-4521	-2074	-2334	-1785	-2074	-2335	-1827		100.1			99.9
R_Date UGa-5631	-2022	-2205	-1783	-2023	-2205	-1788		100.1			99.9
R_Date UGa-5617	-1901	-2109	-1744	-1904	-2036	-1746		100.9			99.9
R_Date UGa-5614	-1851	-2020	-1695	-1859	-2021	-1700		101.2			99.9
R_Date UGa-5615	-1875	-2135	-1643	-1889	-2136	-1686		103			99.9
R_Date UGa-5618	-1791	-2027	-1534	-1828	-2033	-1623		104.1			99.9
R_Date UGa-5632	-1714	-1888	-1531	-1767	-1922	-1612		95			99.9
Boundary End Huaynuna				-1659	-1856	-1351					99.6
Sequence
Boundary Start Piruro				-2192	-2638	-1935					99.7
KDE_Plot Piruro				-1559							100
N Piruro_Kernel	-8.26223e-14	-2	2	-7.81814e-14	-2	2		100			99.9
U Piruro_Scale	0.5	9.97466e-18	1	0.848	0.522	1		100			99.9
R_Date LV-498	-1236	-1489	-980	-1238	-1491	-992		100.5			99.8
R_Date LV-495	-1753	-1950	-1530	-1752	-1948	-1531		100.2			99.9
R_Date LV-494	-1753	-1965	-1521	-1753	-1961	-1524		100.2			99.9
R_Date Gif-7099	-869	-1046	-767	-906	-1112	-791		82.3			99.8
R_Date Gif-7100	-1463	-1628	-1277	-1463	-1628	-1277		99.9			99.9
R_Date Gif-7101	-1372	-1599	-1131	-1372	-1599	-1131		100			99.9
R_Date Gif-7102	-1901	-2133	-1693	-1896	-2124	-1692		101.7			99.9
R_Date Gif-7103	-1485	-1658	-1296	-1485	-1656	-1296		99.9			99.8
R_Date Gif-7266	-2130	-2338	-1941	-2068	-2275	-1907		95.6			99.8
Boundary End Piruro				-811	-1076	-496					99.9
Sequence
Boundary Start Acshicupoto				-2762	-2975	-2621					99.4
KDE_Plot Acshicupoto				-2614							99.9
N Acshicupoto_Kernel	-8.26223e-14	-2	2	-7.81814e-14	-2	2.01		100			99.9
U Acshicupoto_Scale	0.5	9.97466e-18	1	0.77	0.374	1		100			99.9
R_Date PRI-14-108-71	-2775	-2892	-2636	-2704	-2877	-2583		75			99.8
R_Date D-AMS 021271	-2690	-2871	-2506	-2649	-2856	-2502		103.3			99.9
R_Date D-AMS 014375	-2670	-2866	-2500	-2639	-2851	-2500		105.3			99.9
R_Date D-AMS 014376	-2678	-2866	-2504	-2645	-2855	-2501		104.3			99.9
R_Date D-AMS 021270	-2644	-2864	-2492	-2623	-2841	-2494		107.4			99.9
R_Date Beta - 423709	-2591	-2851	-2475	-2590	-2833	-2480		105.3			99.9
R_Date Beta - 423708	-2531	-2624	-2463	-2545	-2620	-2470		99.6			99.9
R_Date D-AMS 021269	-2419	-2566	-2296	-2526	-2578	-2364		74.8			99.8
Boundary End Acshicupoto				-2464	-2571	-2275					98.9
Sequence
Boundary Start Shillacoto				-1745	-3020	-1260					99.6
KDE_Plot Shillacoto				-2							100
N Shillacoto_Kernel	-8.26223e-14	-2	2	1.11	-5.27	4.25		28.6
U Shillacoto_Scale	0.5	9.97466e-18	1	0.543	0.08	0.81		100
R_Date TK-43	-1425	-1622	-1219	-1427	-1622	-1221		100			99.9
Boundary End Shillacoto				-1160	-1579	-480					99.8
Sequence
Boundary Start Hualcayan				-2479	-3074	-2209					99.8
KDE_Plot Hualcayan				-1759							100
N Hualcayan_Kernel	-8.26223e-14	-2	2	-7.81814e-14	-2	2		100			99.9
U Hualcayan_Scale	0.5	9.97466e-18	1	0.791	0.458	1		100			99.9
R_Date D-AMS 008213	-1289	-1402	-1209	-1303	-1402	-1216		99			99.9
R_Date D-AMS 008215	-1523	-1613	-1448	-1523	-1613	-1448		99.3			99.9
R_Date D-AMS 015768	-1967	-2134	-1783	-1967	-2133	-1783		99.9			99.9
R_Date D-AMS 008216	-2309	-2458	-2204	-2290	-2453	-2155		101.6			99.9
Boundary End Hualcayan				-1133	-1385	-598					99.8
Sequence
Boundary Start Caral				-2607	-2742	-2503					99.5
KDE_Plot Caral				-2324							100
N Caral_Kernel	-8.26223e-14	-2	2	-7.81814e-14	-2	2		100			99.9
U Caral_Scale	0.5	9.97466e-18	1	0.631	0.284	1		100			99.9
R_Date Beta-132593	-1956	-2134	-1773	-2030	-2188	-1911		80.4			99.5
R_Date ISGS-4724	-2079	-2291	-1886	-2110	-2295	-1941		104.7			99.8
R_Date Beta-134427	-2096	-2454	-1783	-2133	-2438	-1941		105.6			99.8
R_Date ISGS-4738	-2093	-2401	-1880	-2125	-2396	-1940		105.1			99.8
R_Date ISGS-4740	-2193	-2458	-1981	-2200	-2457	-2026		102.3			99.9
R_Date Beta-132589	-2207	-2456	-2030	-2211	-2455	-2033		101.3			99.9
R_Date ISGS-4710	-2241	-2463	-2036	-2245	-2463	-2040		101.5			99.9
R_Date GS-4726	-2326	-2562	-2061	-2326	-2556	-2064		100.7			99.9
R_Date ISGS-4733	-2396	-2625	-2141	-2388	-2579	-2147		104.1			99.9
R_Date ISGS-4734	-2411	-2847	-2137	-2395	-2598	-2143		106.9			99.9
R_Date Beta-134429	-2411	-2570	-2286	-2410	-2568	-2286		100.6			99.9
R_Date ISGS-4729	-2441	-2832	-2204	-2427	-2585	-2206		105			99.9
R_Date ISGS-4732	-2441	-2832	-2204	-2427	-2585	-2207		105.1			99.9
R_Date Beta-134428	-2501	-2620	-2340	-2493	-2582	-2341		101			99.9
R_Date ISGS-4736	-2555	-2865	-2308	-2509	-2637	-2300		114.2			99.9
R_Date ISGS-4711	-2606	-2880	-2346	-2510	-2668	-2292		102.8			99.9
R_Date Beta-184980	-1943	-2141	-1704	-2050	-2200	-1909		82.1			99.4
R_Date Beta-184984	-2036	-2271	-1881	-2087	-2273	-1933		102.2			99.8
R_Date Beta-184979	-2178	-2456	-1974	-2186	-2456	-2015		102.6			99.9
R_Date Beta-184981	-2226	-2462	-2031	-2230	-2457	-2040		101.6			99.9
R_Date Beta-184977	-2441	-2832	-2204	-2427	-2585	-2207		105.1			99.9
R_Date Beta-184983	-2528	-2866	-2236	-2485	-2637	-2232		112.1			99.9
R_Date Beta-184985	-2555	-2865	-2308	-2509	-2636	-2300		114.1			99.9
R_Date Beta-184973	-2700	-2885	-2491	-2543	-2695	-2462		70.1			99.8
Boundary End Caral				-1976	-2109	-1854					98.5
Sequence
Boundary Start Kotosh				-2064	-3106	-1588					99.7
KDE_Plot Kotosh				-2							100
N Kotosh_Kernel	-8.26223e-14	-2	2	-2.4	-5.55	3.75		24.2
U Kotosh_Scale	0.5	9.97466e-18	1	0.484	0.02	0.69		100
R_Date TK-110	-1740	-1942	-1527	-1741	-1942	-1527		99.9			99.9
Boundary End Kotosh				-1441	-1895	-540					99.7
Sequence
Boundary Start La Galgada				-2650	-3039	-2471					99.8
KDE_Plot La Galgada				-1940							100
N La Galgada_Kernel	-8.26223e-14	-2	2	-7.81814e-14	-2	2		100			99.9
U La Galgada_Scale	0.5	9.97466e-18	1	0.894	0.638	1		100			99.9
R_Date TX3167	-2207	-2456	-2030	-2207	-2456	-2029		99.9			99.8
R_Date TK4449	-2163	-2453	-1949	-2163	-2452	-1950		100			99.9
R_Date TK4448	-1970	-2141	-1771	-1970	-2141	-1770		100			99.9
R_Date UGa4583	-1887	-2133	-1687	-1887	-2133	-1687		100			99.8
R_Date TX-2463	-1741	-1961	-1505	-1742	-1962	-1508		100.3			99.8
R_Date TX-2464	-1702	-1907	-1502	-1704	-1903	-1504		100.4			99.9
R_Date TX-3166	-1985	-2204	-1747	-1985	-2204	-1747		99.8			99.8
R_Date TX-3663	-1821	-1962	-1683	-1821	-1964	-1682		100			99.9
R_Date TX-3664	-2622	-2865	-2472	-2549	-2836	-2350		102.2			99.9
R_Date TX-4446	-1335	-1530	-1110	-1418	-1622	-1224		86.2			99.8
R_Date TX-4447	-1997	-2201	-1772	-1997	-2201	-1772		100			99.9
Boundary End La Galgada				-1323	-1607	-947					99.6
Sequence
Boundary Start Pampa de las Llamas				-1977	-2154	-1793					98.7
KDE_Plot Pampa de las Llamas				-1546							100
N Pampa de las Llamas_Kernel	-8.26223e-14	-2	2	-7.81814e-14	-2.01	1.99		100			99.9
U Pampa de las Llamas_Scale	0.5	9.97466e-18	1	0.673	0.305	1		100			99.9
R_Date UGa-5796	-2101	-2451	-1881	-1918	-2088	-1744		55.3			99.5
R_Date UGa-4505	-2086	-2339	-1882	-1924	-2083	-1748		55.8		90	99.5
R_Date UGa-5461	-1802	-2011	-1622	-1787	-1951	-1621		103.4		90	99.9
R_Date UGa-5462	-1797	-2009	-1618	-1783	-1948	-1618		103.1			99.9
R_Date UGa-5801	-1772	-2012	-1532	-1758	-1946	-1533		103.7			99.9
R_Date UGa-4506	-1765	-1955	-1534	-1756	-1938	-1546		102.5			99.9
R_Date UGa-5799	-1731	-1893	-1561	-1728	-1891	-1561		100.9			99.9
R_Date UGa-4508	-1682	-1885	-1503	-1680	-1881	-1506		101.1			99.9
R_Date UGa-5800	-1582	-1737	-1449	-1581	-1736	-1448		100.1			99.9
R_Date UGa-4509	-1563	-1862	-1318	-1564	-1771	-1326		100.9			99.9
R_Date UGa-5611	-1551	-1739	-1408	-1551	-1737	-1410		100.3			99.9
R_Date UGa-5610	-1504	-1631	-1403	-1504	-1628	-1406		100.2			99.9
R_Date UGa-5795	-1478	-1622	-1308	-1479	-1623	-1318		101.3			99.9
R_Date UGa-5609	-1463	-1617	-1297	-1466	-1616	-1306		102.6			99.9
R_Date UGa-5797	-1452	-1612	-1292	-1456	-1611	-1305		103.3			99.9
R_Date UGa-5630	-1416	-1605	-1232	-1425	-1604	-1278		104.9			99.9
R_Date UGa-5794	-1409	-1600	-1228	-1420	-1601	-1272		105.2			99.9
R_Date UGa-4511	-1390	-1618	-1128	-1421	-1616	-1261		108.8			99.9
R_Date UGa-4503	-1378	-1607	-1131	-1406	-1606	-1259		107.7			99.9
R_Date UGa-5798	-1369	-1609	-1128	-1407	-1610	-1258		108.9			99.9
R_Date UGa-5873	-1326	-1415	-1223	-1357	-1422	-1264		104.6			99.9
R_Date UGa-4504	-1264	-1492	-1015	-1365	-1501	-1225		102			99.8
Boundary End Pampa de las Llamas				-1284	-1391	-1157					99.5
Sequence
Boundary Start Buena Vista				-2161	-2474	-1948					99.5
KDE_Plot Buena Vista				-1838							100
N Buena Vista_Kernel	-8.26223e-14	-2	2	-7.81814e-14	-2	2.01		99.9			99.9
U Buena Vista_Scale	0.5	9.97466e-18	1	0.705	0.323	1		100			99.9
R_Date GX-32177	-2165	-2457	-1947	-2057	-2276	-1888		92.7			99.9
R_Date GX-31276	-2135	-2452	-1907	-2048	-2275	-1882		97.4			99.9
R_Date UGAMS- 2685	-1904	-2020	-1771	-1904	-2017	-1771		100			99.9
R_Date GX-31920	-1986	-2277	-1699	-1958	-2192	-1701		105.3			99.9
R_Date UGAMS- 3128	-1806	-1890	-1693	-1806	-1891	-1693		99.8			99.9
R_Date UGAMS- 3127	-1706	-1870	-1621	-1711	-1870	-1625		101.8			99.9
R_Date UGAMS- 3126	-1671	-1753	-1562	-1681	-1751	-1615		100.7			99.9
R_Date UGAMS- 3129	-1671	-1753	-1562	-1681	-1751	-1615		100.7			99.9
Boundary End Buena Vista				-1608	-1725	-1377					99.5
Sequence
Boundary Start El Paraiso				-1813	-2247	-1657					99.6
KDE_Plot El Paraiso				-1627							100
N El Paraiso_Kernel	-8.26223e-14	-2	2	-7.81814e-14	-2	2		100			99.9
U El Paraiso_Scale	0.5	9.97466e-18	1	0.871	0.601	1		100			99.9
R_Date P-1209	-1264	-1425	-1056	-1351	-1498	-1131		94			99.9
R_Date P-1210	-1606	-1751	-1451	-1603	-1745	-1455		102			99.9
R_Date JQ02	-1671	-1747	-1613	-1668	-1745	-1613		101			99.9
R_Date P-1214	-1705	-1882	-1534	-1683	-1867	-1528		106.3			99.9
R_Date JQ10	-1712	-1869	-1626	-1702	-1771	-1626		101.8			99.9
Boundary End El Paraiso				-1245	-1488	-811					99.7
Sequence
Boundary Start Bahia Seca				-1599	-1956	-1435					99.1
KDE_Plot Bahia Seca				-1485							99.9
N Bahia Seca_Kernel	-8.26223e-14	-2	2	-7.81814e-14	-2.01	2		100			99.9
U Bahia Seca_Scale	0.5	9.97466e-18	1	0.804	0.417	1		100			99.9
R_Date UGa-6129	-1593	-1744	-1448	-1531	-1670	-1428		89.5			99.9
R_Date UGa-6023	-1516	-1659	-1406	-1498	-1616	-1414		108			99.9
R_Date UGa-6025	-1474	-1624	-1302	-1478	-1615	-1326		114.6			99.9
R_Date UGa-6022	-1368	-1501	-1225	-1434	-1531	-1280		85			99.8
Boundary End Bahia Seca				-1379	-1527	-1008					99.4
Sequence
Boundary Start Taukachi-Konkan				-1513	-1617	-1446					96.9
KDE_Plot Taukachi-Konkan				-1437							99.6
N Taukachi-Konkan_Kernel	-8.26223e-14	-2	2	-7.81814e-14	-2	2		100			99.9
U Taukachi-Konkan_Scale	0.5	9.97466e-18	1	0.726	0.341	1		100			99.9
R_Date UGa-7041	-1625	-1871	-1447	-1476	-1574	-1412		47.5		90	98.8
R_Date UGa-7037	-1625	-1871	-1447	-1476	-1573	-1412		47.3		89.9	98.8
R_Date UGa-7040	-1501	-1613	-1422	-1467	-1540	-1409		110.6			99.3
R_Date UGa-7042	-1331	-1496	-1130	-1396	-1496	-1302		102.1			99.6
R_Date UGa-7038	-1335	-1450	-1208	-1391	-1490	-1292		100.2			99.6
R_Date UGa-7039	-1174	-1369	-1029	-1371	-1422	-1243		14.7		5	99.3
R_Date Beta-535191	-1476	-1607	-1411	-1463	-1522	-1412		109.3			99.4
R_Date Beta-427589	-1454	-1528	-1323	-1449	-1506	-1394		105.6			99.7
R_Date Beta-427588	-1445	-1515	-1310	-1443	-1506	-1386		107			99.7
R_Date Beta-427587	-1434	-1506	-1305	-1435	-1504	-1327		109.3			99.8
R_Date Beta-535190	-1398	-1496	-1287	-1413	-1495	-1319		109.9			99.9
R_Date Beta-535192	-1423	-1502	-1303	-1428	-1501	-1322		111.3			99.9
R_Date Beta-477229	-1351	-1441	-1261	-1395	-1448	-1305		101.5			99.7
R_Date Beta-477227	-1470	-1602	-1402	-1459	-1517	-1408		107			99.5
R_Date Beta- 477228	-1454	-1528	-1323	-1449	-1506	-1394		105.6			99.7
Boundary End Taukachi-Konkan				-1352	-1411	-1226					98.1
Sequence
Boundary Start Huacaloma				-1583	-2957	-1098					99.6
KDE_Plot Huacaloma				-2							100
N Huacaloma_Kernel	-8.26223e-14	-2	2	-2.65	-5.65	2.45		31.8
U Huacaloma_Scale	0.5	9.97466e-18	1	0.49	0.03	0.79		100
R_Date TK341a	-1281	-1441	-1055	-1285	-1445	-1057		100.5			99.9
Boundary End Huacaloma				-1046	-1410	-455					99.8
Sequence
Boundary Start Gramalote				-1400	-1797	-1236					99.2
KDE_Plot Gramalote				-1321							99.9
N Gramalote_Kernel	-8.26223e-14	-2	2	-7.81814e-14	-2	2.01		100			99.9
U Gramalote_Scale	0.5	9.97466e-18	1	0.818	0.521	1		100			99.9
R_Date Beta-321940	-1291	-1414	-1130	-1311	-1411	-1211		107.7			99.9
R_Date Beta-321943	-1351	-1489	-1230	-1333	-1431	-1233		101.5			99.8
R_Date Beta-321945	-1291	-1414	-1130	-1311	-1411	-1211		107.7			99.9
Boundary End Gramalote				-1241	-1398	-873					99.5
Sequence
Boundary Start Chavin				-864	-1164	-772					99.3
KDE_Plot Chavin				-774							99.9
N Chavin_Kernel	-8.26223e-14	-2	2	-7.81814e-14	-2	2		100			99.9
U Chavin_Scale	0.5	9.97466e-18	1	0.788	0.375	1		100			99.9
R_Date AA69448	-604	-764	-416	-729	-798	-555		95.2			99.9
R_Date AA69449	-646	-802	-490	-752	-805	-577		107			99.9
R_Date AA69446	-786	-895	-546	-791	-888	-574		121.7			99.9
R_Date AA69447	-836	-918	-788	-818	-897	-774		106.9			99.9
Boundary End Chavin				-662	-790	-422					99.7
Boundary End Kotosh Religious Tradition				-441	-713	-55					97.8

## Sheet: Model C
Name	Unmodelled (BCE/CE)			Modelled (BCE/CE)			Indices_x000D_ Amodel 88.8_x000D_ Aoverall 84.7
	median	from_95_4	to_95_4	median	from_95_4	to_95_4	Acomb	A	L	P	C
Outlier_Model General				-1	-6	8					100
T(5)	2.04945e-12	-2.65	2.65	-0.035							99.1
U(0.4,0)	0.2	1.92446e-18	0.4	0.2	-1.54499e-18	0.4		100			100
Curve SHCal13
Order
Sequence Kotosh Religious Tradition
Boundary Start Kotosh Religious Tradition				-3291	-3664	-3045					93.4
Phase Kotosh Religious Tradition
Sequence
Boundary Start Huaricanga				-3196	-3508	-3024					99.7
KDE_Plot Huaricanga				-2495							100
N Huaricanga_Kernel	-8.26223e-14	-2	2	-7.81814e-14	-2	2		100			99.9
U Huaricanga_Scale	0.5	9.97466e-18	1	0.545	0.236	0.989		100			99.9
R_Date AA102184	-3453	-3639	-3120	-3141	-3450	-2929		24		50	99.6
R_Date AA102185	-3062	-3340	-2892	-3016	-3266	-2880		109.8			99.9
R_Date AA102179	-3010	-3336	-2877	-2991	-3266	-2780		110.3			99.9
R_Date AA84560	-2506	-2623	-2340	-2507	-2622	-2341		100.1			99.9
R_Date AA102181	-2388	-2561	-2211	-2396	-2564	-2233		103.2			99.9
R_Date AA102180	-2391	-2548	-2215	-2397	-2554	-2282		102.4			99.9
R_Date AA10282	-2380	-2476	-2210	-2387	-2479	-2234		103.3			99.9
R_Date AA84551	-2366	-2475	-2206	-2379	-2478	-2212		104.5			99.9
R_Date AA84552	-2331	-2469	-2155	-2357	-2468	-2212		103.3			99.9
Boundary End Huaricanga				-2218	-2395	-1878					99.4
Sequence
Boundary Start Huaynuna				-2699	-3019	-2487					99.6
KDE_Plot Huaynuna				-2043							100
N Huaynuna_Kernel	-8.26223e-14	-2	2	-7.81814e-14	-2	2		100			99.9
U Huaynuna_Scale	0.5	9.97466e-18	1	0.712	0.33	1		100			99.9
R_Date UGa-4522	-2733	-2909	-2492	-2609	-2852	-2466		75.8			99.8
R_Date UGa-5616	-2645	-3340	-2033	-2452	-2842	-1973		101.8			99.8
R_Date UGa-4520	-2527	-2856	-2296	-2506	-2683	-2289		105.7			99.9
R_Date UGa-5619	-2223	-2456	-2037	-2223	-2454	-2037		99.9			99.9
R_Date UGa-5612	-2191	-2456	-1983	-2191	-2454	-1984		99.9			99.8
R_Date UGa-4521	-2074	-2334	-1785	-2074	-2334	-1828		100.1			99.8
R_Date UGa-5631	-2022	-2205	-1783	-2023	-2205	-1786		100.2			99.9
R_Date UGa-5617	-1901	-2109	-1744	-1904	-2036	-1746		101			99.9
R_Date UGa-5613	-1904	-2197	-1640	-1917	-2198	-1687		103.3			99.8
R_Date UGa-5615	-1875	-2135	-1643	-1890	-2136	-1688		103.3			99.9
R_Date UGa-5614	-1851	-2020	-1695	-1860	-2021	-1701		101.4			99.9
R_Date UGa-5618	-1791	-2027	-1534	-1830	-2033	-1629		104.3			99.9
R_Date UGa-5632	-1714	-1888	-1531	-1772	-1919	-1617		94.2			99.9
Boundary End Huaynuna				-1672	-1856	-1414					99.6
Sequence
Boundary Start Piruro				-2734	-3236	-2334					99.8
KDE_Plot Piruro				-2207							100
N Piruro_Kernel	-8.26223e-14	-2	2	-7.81814e-14	-2	2.01		100.1			99.9
U Piruro_Scale	0.5	9.97466e-18	1	0.899	0.682	1		100			99.9
R_Date LV-498	-1236	-1489	-980	-1309	-1506	-1045		97.7			99.9
R_Date Gif-2302	-2362	-2859	-1979	-2333	-2671	-1961		104.1			99.8
R_Date Gif-2304/5	-2505	-2882	-2142	-2431	-2854	-2052		101.4			99.8
R_Date Gif-2304/7	-2536	-3321	-1893	-2382	-2885	-1891		103			99.8
R_Date Gif-2305	-2295	-2834	-1912	-2278	-2617	-1921		102.9			99.8
R_Date Gif-7266	-2130	-2338	-1941	-2130	-2338	-1941		100.1			99.9
Boundary End Piruro				-1126	-1448	-666					99.8
Sequence
Boundary Start Acshicupoto				-2762	-2974	-2619					99.2
KDE_Plot Acshicupoto				-2614							99.9
N Acshicupoto_Kernel	-8.26223e-14	-2	2	-7.81814e-14	-2	2		100			99.9
U Acshicupoto_Scale	0.5	9.97466e-18	1	0.77	0.374	1		100			99.9
R_Date PRI-14-108-71	-2775	-2892	-2636	-2704	-2877	-2582		74.8			99.7
R_Date D-AMS 021271	-2690	-2871	-2506	-2649	-2855	-2502		103.3			99.8
R_Date D-AMS 014375	-2670	-2866	-2500	-2639	-2851	-2500		105.4			99.9
R_Date D-AMS 014376	-2678	-2866	-2504	-2645	-2855	-2501		104.3			99.8
R_Date D-AMS 021270	-2644	-2864	-2492	-2622	-2842	-2493		107.5			99.9
R_Date Beta - 423709	-2591	-2851	-2475	-2590	-2833	-2480		105.3			99.9
R_Date Beta - 423708	-2531	-2624	-2463	-2545	-2620	-2470		99.4			99.9
R_Date D-AMS 021269	-2419	-2566	-2296	-2526	-2579	-2363		74.5			99.6
Boundary End Acshicupoto				-2464	-2572	-2277					98.6
Sequence
Boundary Start Hualcayan				-2479	-3099	-2208					99.8
KDE_Plot Hualcayan				-1759							100
N Hualcayan_Kernel	-8.26223e-14	-2	2	-7.81814e-14	-2.01	2		100.1			99.9
U Hualcayan_Scale	0.5	9.97466e-18	1	0.79	0.458	1		100			99.9
R_Date D-AMS 008213	-1289	-1402	-1209	-1304	-1403	-1217		99			99.9
R_Date D-AMS 008215	-1523	-1613	-1448	-1522	-1612	-1448		99.3			99.9
R_Date D-AMS 015768	-1967	-2134	-1783	-1967	-2133	-1783		100			99.9
R_Date D-AMS 008216	-2309	-2458	-2204	-2290	-2453	-2155		101.6			99.9
Boundary End Hualcayan				-1143	-1382	-705					99.9
Sequence
Boundary Start Caral				-2568	-2721	-2430					99.6
KDE_Plot Caral				-2323							100
N Caral_Kernel	-8.26223e-14	-2	2	-7.81814e-14	-2	2		100			99.9
U Caral_Scale	0.5	9.97466e-18	1	0.683	0.312	1		100			99.9
R_Date Beta-132593	-1956	-2134	-1773	-2091	-2199	-1924		63.6			99.6
R_Date ISGS-4724	-2079	-2291	-1886	-2128	-2333	-1951		101			99.8
R_Date Beta-134427	-2096	-2454	-1783	-2154	-2449	-1959		102.5			99.8
R_Date ISGS-4738	-2093	-2401	-1880	-2144	-2401	-1953		102.1			99.8
R_Date ISGS-4740	-2193	-2458	-1981	-2208	-2455	-2033		103.6			99.9
R_Date Beta-132589	-2207	-2456	-2030	-2217	-2453	-2038		102.8			99.9
R_Date ISGS-4710	-2241	-2463	-2036	-2249	-2463	-2047		103.1			99.9
R_Date GS-4726	-2326	-2562	-2061	-2324	-2546	-2131		102.1			99.9
R_Date ISGS-4727	-2400	-2857	-2043	-2365	-2582	-2066		111.6			99.9
R_Date ISGS-4733	-2396	-2625	-2141	-2379	-2571	-2150		106.1			99.9
R_Date ISGS-4734	-2411	-2847	-2137	-2383	-2576	-2145		108.6			99.9
R_Date Beta-134429	-2411	-2570	-2286	-2406	-2565	-2285		101.9			99.9
R_Date ISGS-4729	-2441	-2832	-2204	-2413	-2576	-2208		105.4			99.9
R_Date ISGS-4732	-2441	-2832	-2204	-2413	-2576	-2207		105.4			99.9
R_Date Beta-134428	-2501	-2620	-2340	-2481	-2578	-2338		95			99.9
R_Date ISGS-4736	-2555	-2865	-2308	-2488	-2618	-2295		104.3			99.8
R_Date ISGS-4711	-2606	-2880	-2346	-2488	-2639	-2233		90.9			99.8
Boundary End Caral				-2017	-2152	-1850					98.8
Sequence
Boundary Start Kotosh				-2573	-3456	-1241					99.6
KDE_Plot Kotosh				-2							100
N Kotosh_Kernel	-8.26223e-14	-2	2	1.35	-4.85	5.35		25.9
U Kotosh_Scale	0.5	9.97466e-18	1	0.595	0.04	0.962		100
R_Date TK-42	-2448	-4781	-359	-2081	-3143	-922		120			99.8
Boundary End Kotosh				-1536	-2864	-541					99.6
Sequence
Boundary Start La Galgada				-2264	-2612	-2047					99.6
KDE_Plot La Galgada				-1903							100
N La Galgada_Kernel	-8.26223e-14	-2	2	-7.81814e-14	-2	2.01		100			99.9
U La Galgada_Scale	0.5	9.97466e-18	1	0.842	0.484	1		100			99.9
R_Date TX3167	-2207	-2456	-2030	-2148	-2336	-1976		99.1			99.9
R_Date TK4449	-2163	-2453	-1949	-2112	-2303	-1932		104.9			99.9
R_Date TK4448	-1970	-2141	-1771	-1968	-2140	-1771		100.9			99.9
R_Date TX-2463	-1741	-1961	-1505	-1743	-1960	-1508		100.7			99.9
R_Date TX-2464	-1702	-1907	-1502	-1705	-1902	-1505		100.6			99.9
R_Date TX-3166	-1985	-2204	-1747	-1979	-2196	-1754		102.2			99.9
R_Date TX-3663	-1821	-1962	-1683	-1821	-1963	-1682		100			99.9
R_Date TX-4446	-1335	-1530	-1110	-1432	-1633	-1223		79.9			99.8
R_Date TX-4447	-1997	-2201	-1772	-1993	-2197	-1773		101.8			99.9
Boundary End La Galgada				-1349	-1621	-981					99.6
Sequence
Boundary Start Pampa de las Llamas				-1998	-2333	-1752					99.1
KDE_Plot Pampa de las Llamas				-1485							100
N Pampa de las Llamas_Kernel	-8.26223e-14	-2	2	-7.81814e-14	-2	2		100			99.9
U Pampa de las Llamas_Scale	0.5	9.97466e-18	1	0.735	0.352	1		100			99.9
R_Date UGa-5796	-2101	-2451	-1881	-1930	-2155	-1694		62			99.7
R_Date UGa-5462	-1797	-2009	-1618	-1778	-1953	-1615		102			99.9
R_Date UGa-4506	-1765	-1955	-1534	-1752	-1938	-1544		102.1			99.9
R_Date UGa-5609	-1463	-1617	-1297	-1465	-1616	-1303		101.6			99.9
R_Date UGa-5797	-1452	-1612	-1292	-1455	-1611	-1302		102			99.9
R_Date UGa-5630	-1416	-1605	-1232	-1422	-1603	-1265		103.3			99.9
R_Date UGa-5794	-1409	-1600	-1228	-1417	-1601	-1262		103.5			99.9
R_Date UGa-4511	-1390	-1618	-1128	-1413	-1616	-1232		107			99.9
R_Date UGa-5798	-1369	-1609	-1128	-1398	-1609	-1226		107.3			99.9
R_Date UGa-5873	-1326	-1415	-1223	-1349	-1422	-1236		103.5			99.9
Boundary End Pampa de las Llamas				-1250	-1395	-1009					99.8
Sequence
Boundary Start Buena Vista				-2147	-2483	-1921					99.3
KDE_Plot Buena				-1784							100
N Buena_Kernel	-8.26223e-14	-2	2	-7.81814e-14	-1.99	2.01		100.1			99.9
U Buena_Scale	0.5	9.97466e-18	1	0.709	0.323	1		100			99.9
R_Date PI-1845	-1638	-1876	-1453	-1679	-1878	-1529		100			99.9
R_Date UGAMS- 3129	-1671	-1753	-1562	-1678	-1752	-1612		101.4			99.9
R_Date UGAMS- 3126	-1671	-1753	-1562	-1678	-1753	-1612		101.3			99.9
R_Date UGAMS- 3127	-1706	-1870	-1621	-1709	-1870	-1623		101.3			99.9
R_Date UGAMS- 3128	-1806	-1890	-1693	-1806	-1891	-1693		99.8			99.9
R_Date GX-30695	-1901	-2109	-1744	-1898	-2032	-1746		101.1			99.9
R_Date GX-31276	-2135	-2452	-1907	-2041	-2273	-1785		93.9			99.8
R_Date GX-32177	-2165	-2457	-1947	-2050	-2287	-1882		88.8			99.8
Boundary End Buena Vista				-1586	-1716	-1335					99.6
Sequence
Boundary Start El Paraiso				-1974	-2547	-1697					99.5
KDE_Plot El Paraiso				-1677							100
N El Paraiso_Kernel	-8.26223e-14	-2	2	-7.81814e-14	-2	2		99.9			99.9
U El Paraiso_Scale	0.5	9.97466e-18	1	0.886	0.655	1		100			99.9
R_Date Beta-8704	-1198	-1394	-1014	-1267	-1424	-1073		89.2			99.9
R_Date JQ02	-1671	-1747	-1613	-1670	-1747	-1613		99.9			99.9
R_Date JQ10	-1712	-1869	-1626	-1710	-1864	-1627		101			99.9
R_Date I-13275	-1838	-2136	-1565	-1784	-2027	-1536		103			99.9
R_Date I-13276	-1850	-2141	-1611	-1790	-2033	-1545		102.4			99.8
Boundary End El Paraiso				-1146	-1402	-746					99.8
Sequence
Boundary Start Taukachi-Konkan				-1455	-1517	-1420					96.9
KDE_Plot Taukachi-Konkan				-1434							99.5
N Taukachi-Konkan_Kernel	-8.26223e-14	-2	2	-7.81814e-14	-2	2		100			99.9
U Taukachi-Konkan_Scale	0.5	9.97466e-18	1	0.743	0.356	1		100			99.9
R_Date Beta-535191	-1476	-1607	-1411	-1440	-1491	-1412		93.6			99.1
R_Date Beta-427589	-1454	-1528	-1323	-1436	-1489	-1409		116.1			99.3
R_Date Beta-427588	-1445	-1515	-1310	-1435	-1490	-1406		126.2			99.4
R_Date Beta-427587	-1434	-1506	-1305	-1433	-1491	-1402		134.6			99.5
R_Date Beta-535190	-1398	-1496	-1287	-1429	-1491	-1390		115			99.6
R_Date Beta-535192	-1423	-1502	-1303	-1432	-1491	-1397		137			99.6
R_Date Beta-477229	-1351	-1441	-1261	-1425	-1488	-1381		63.5			99.4
R_Date Beta-477227	-1470	-1602	-1402	-1439	-1491	-1411		99.8			99.2
R_Date Beta- 477228	-1454	-1528	-1323	-1436	-1489	-1409		116.1			99.4
Boundary End Taukachi-Konkan				-1414	-1449	-1355					99
Sequence
Boundary Start Gramalote				-1400	-1784	-1239					98.9
KDE_Plot Gramalote				-1322							99.9
N Gramalote_Kernel	-8.26223e-14	-2	2	-7.81814e-14	-2	2		100.1			99.9
U Gramalote_Scale	0.5	9.97466e-18	1	0.818	0.522	1		100			99.9
R_Date Beta-321940	-1291	-1414	-1130	-1312	-1411	-1211		107.8			99.9
R_Date Beta-321943	-1351	-1489	-1230	-1333	-1431	-1233		101.7			99.9
R_Date Beta-321945	-1291	-1414	-1130	-1312	-1411	-1211		107.8			99.8
Boundary End Gramalote				-1242	-1396	-905					99.6
Sequence
Boundary Start Chavin				-849	-1071	-773					98.4
KDE_Plot Chavin				-780							99.9
N Chavin_Kernel	-8.26223e-14	-2	2	-7.81814e-14	-2	2.01		100			99.9
U Chavin_Scale	0.5	9.97466e-18	1	0.791	0.381	1		100			99.9
R_Date AA69448	-604	-764	-416	-747	-801	-619		85.8			99.8
R_Date AA69449	-646	-802	-490	-765	-807	-613		108.9			99.9
R_Date AA69446	-786	-895	-546	-792	-856	-599		130.4			99.9
R_Date AA69447	-836	-918	-788	-815	-891	-772		105.9			99.8
Boundary End Chavin				-713	-793	-526					99.8
Boundary End Kotosh Religious Tradition				-613	-779	-309					95.1

## Sheet: Model D
Name	Unmodelled (BCE/CE)			Modelled (BCE/CE)			Indices_x000D_ Amodel 85.4_x000D_ Aoverall 86.9
	median	from_95_4	to_95_4	median	from_95_4	to_95_4	Acomb	A	L	P	C
Outlier_Model General				-1	-6	8					100
T(5)	2.04945e-12	-2.65	2.65	-0.03							97.6
U(0.4,0)	0.2	1.92446e-18	0.4	0.2	-1.54499e-18	0.4		100			99.9
Curve SHCal13
Order
Sequence Kotosh Religious Tradition
Boundary Start Kotosh Religious Tradition				-3258	-3624	-2991					96.7
Phase Kotosh Religious Tradition
Sequence
Boundary Start Huaricanga				-3175	-3447	-2961					99.5
KDE_Plot Huaricanga				-2494							100
N Huaricanga_Kernel	-8.26223e-14	-2	2	-4.35424e-14	-2	2		100			99.8
U Huaricanga_Scale	0.5	9.97466e-18	1	0.53	0.219	0.985		100			99.8
R_Date AA102184	-3453	-3639	-3120	-3133	-3417	-2922		19.3		80	99.5
R_Date AA102185	-3062	-3340	-2892	-3008	-3262	-2878		111.1			99.7
R_Date AA102179	-3010	-3336	-2877	-2985	-3263	-2778		112			99.8
R_Date AA84560	-2506	-2623	-2340	-2507	-2622	-2342		100.4			99.7
R_Date AA102181	-2388	-2561	-2211	-2398	-2563	-2236		103.6			99.8
R_Date AA102180	-2391	-2548	-2215	-2398	-2551	-2284		102.8			99.9
R_Date AA10282	-2380	-2476	-2210	-2389	-2479	-2236		103.8			99.8
R_Date AA84551	-2366	-2475	-2206	-2382	-2481	-2211		105.1			99.9
R_Date AA84552	-2331	-2469	-2155	-2363	-2469	-2214		103.4			99.9
Boundary End Huaricanga				-2234	-2400	-1931					98.7
Sequence
Boundary Start Huaynuna				-2686	-3033	-2478					99.3
KDE_Plot Huaynuna				-2031							100
N Huaynuna_Kernel	-8.26223e-14	-2	2	-4.17661e-14	-2	2.01		100			99.8
U Huaynuna_Scale	0.5	9.97466e-18	1	0.737	0.345	1		100			99.8
R_Date UGa-4522	-2733	-2909	-2492	-2601	-2868	-2463		72.9			99.6
R_Date UGa-4520	-2527	-2856	-2296	-2503	-2682	-2288		105.3			99.7
R_Date UGa-5619	-2223	-2456	-2037	-2223	-2454	-2037		100			99.7
R_Date UGa-5612	-2191	-2456	-1983	-2191	-2454	-1984		100.1			99.8
R_Date UGa-4521	-2074	-2334	-1785	-2074	-2334	-1829		100.1			99.7
R_Date UGa-5631	-2022	-2205	-1783	-2022	-2205	-1789		100.2			99.7
R_Date UGa-5617	-1901	-2109	-1744	-1904	-2109	-1746		101			99.7
R_Date UGa-5615	-1875	-2135	-1643	-1890	-2137	-1687		103.2			99.6
R_Date UGa-5614	-1851	-2020	-1695	-1861	-2021	-1700		101.3			99.8
R_Date UGa-5618	-1791	-2027	-1534	-1831	-2034	-1626		104			99.7
R_Date UGa-5632	-1714	-1888	-1531	-1772	-1921	-1616		93.9			99.7
Boundary End Huaynuna				-1668	-1863	-1375					99
Sequence
Boundary Start Piruro				-2409	-3175	-1991					99.5
KDE_Plot Piruro				-1701							100
N Piruro_Kernel	-8.26223e-14	-2	2	-6.1306e-14	-2	2.01		99.9			99.7
U Piruro_Scale	0.5	9.97466e-18	1	0.522	0.055	1		100			99.9
R_Date LV-498	-1236	-1489	-980	-1285	-1498	-1038		100.1			99.7
R_Date Gif-7266	-2130	-2338	-1941	-2102	-2295	-1928		100.1			99.8
Boundary End Piruro				-1038	-1410	-598					99.7
Sequence
Boundary Start Acshicupoto				-2743	-2947	-2603					98.2
KDE_Plot Acshicupoto				-2611							99.8
N Acshicupoto_Kernel	-8.26223e-14	-2	2	-5.42006e-14	-2	2		100			99.8
U Acshicupoto_Scale	0.5	9.97466e-18	1	0.764	0.369	1		100			99.8
R_Date PRI-14-108-71	-2775	-2892	-2636	-2695	-2813	-2580		69			99.2
R_Date D-AMS 021271	-2690	-2871	-2506	-2644	-2852	-2502		103.8			99.8
R_Date D-AMS 014375	-2670	-2866	-2500	-2635	-2843	-2500		106.5			99.8
R_Date D-AMS 014376	-2678	-2866	-2504	-2640	-2850	-2502		105.2			99.8
R_Date D-AMS 021270	-2644	-2864	-2492	-2620	-2838	-2495		109.4			99.8
R_Date Beta - 423709	-2591	-2851	-2475	-2590	-2831	-2481		106.6			99.8
R_Date Beta - 423708	-2531	-2624	-2463	-2548	-2621	-2471		98.5			99.7
R_Date D-AMS 021269	-2419	-2566	-2296	-2536	-2580	-2368		69.8			99.4
Boundary End Acshicupoto				-2478	-2573	-2291					97.5
Sequence
Boundary Start Hualcayan				-2460	-3071	-2205					99.4
KDE_Plot Hualcayan				-1759							100
N Hualcayan_Kernel	-8.26223e-14	-2	2	-5.86415e-14	-2.02	1.99		100			99.8
U Hualcayan_Scale	0.5	9.97466e-18	1	0.79	0.457	1		100			99.8
R_Date D-AMS 008213	-1289	-1402	-1209	-1307	-1404	-1217		98.7			99.9
R_Date D-AMS 008215	-1523	-1613	-1448	-1522	-1612	-1448		99.4			99.8
R_Date D-AMS 015768	-1967	-2134	-1783	-1967	-2134	-1783		99.8			99.8
R_Date D-AMS 008216	-2309	-2458	-2204	-2287	-2453	-2153		101.7			99.9
Boundary End Hualcayan				-1158	-1383	-723					99.7
Sequence
Boundary Start Caral				-2564	-2721	-2416					99
KDE_Plot Caral				-2318							100
N Caral_Kernel	-8.26223e-14	-2	2	-4.53188e-14	-2	2.01		100			99.9
U Caral_Scale	0.5	9.97466e-18	1	0.683	0.312	1		100			99.8
R_Date Beta-132593	-1956	-2134	-1773	-2091	-2199	-1924		63.6			99.8
R_Date ISGS-4724	-2079	-2291	-1886	-2129	-2333	-1951		100.8			99.8
R_Date Beta-134427	-2096	-2454	-1783	-2154	-2452	-1960		102.5			99.8
R_Date ISGS-4738	-2093	-2401	-1880	-2145	-2401	-1953		101.9			99.7
R_Date ISGS-4740	-2193	-2458	-1981	-2208	-2455	-2033		103.7			99.8
R_Date Beta-132589	-2207	-2456	-2030	-2217	-2453	-2038		102.9			99.8
R_Date ISGS-4710	-2241	-2463	-2036	-2249	-2463	-2048		103.2			99.9
R_Date GS-4726	-2326	-2562	-2061	-2324	-2545	-2130		102.2			99.8
R_Date ISGS-4733	-2396	-2625	-2141	-2378	-2570	-2150		106.1			99.9
R_Date ISGS-4734	-2411	-2847	-2137	-2381	-2575	-2145		108.6			99.8
R_Date Beta-134429	-2411	-2570	-2286	-2404	-2564	-2285		101.9			99.8
R_Date ISGS-4729	-2441	-2832	-2204	-2411	-2574	-2208		105.2			99.8
R_Date ISGS-4732	-2441	-2832	-2204	-2411	-2574	-2208		105.2			99.8
R_Date Beta-134428	-2501	-2620	-2340	-2480	-2577	-2311		93.6			99.8
R_Date ISGS-4736	-2555	-2865	-2308	-2486	-2619	-2294		102.3			99.8
R_Date ISGS-4711	-2606	-2880	-2346	-2485	-2639	-2232		89.2			99.7
Boundary End Caral				-2017	-2169	-1852					99.2
Sequence
Boundary Start La Galgada				-2186	-2547	-1963					98.8
KDE_Plot La Galgada				-1863							100
N La Galgada_Kernel	-8.26223e-14	-2	2	0.05	-2	2.01		100			99.9
U La Galgada_Scale	0.5	9.97466e-18	1	0.844	0.488	1		100			99.8
R_Date TK4449	-2163	-2453	-1949	-2073	-2281	-1914		96.1			99.8
R_Date TK4448	-1970	-2141	-1771	-1962	-2136	-1772		102.7			99.8
R_Date TX-2463	-1741	-1961	-1505	-1743	-1957	-1511		100.8			99.8
R_Date TX-2464	-1702	-1907	-1502	-1705	-1902	-1506		100.8			99.7
R_Date TX-3166	-1985	-2204	-1747	-1968	-2192	-1749		104.1			99.8
R_Date TX-3663	-1821	-1962	-1683	-1821	-1962	-1683		100			99.7
R_Date TX-4446	-1335	-1530	-1110	-1435	-1658	-1221		78.1			99.5
R_Date TX-4447	-1997	-2201	-1772	-1982	-2190	-1771		103.6			99.8
Boundary End La Galgada				-1354	-1638	-967					99.2
Sequence
Boundary Start Pampa de las Llamas				-2013	-2377	-1753					98.5
KDE_Plot Pampa de las Llamas				-1491							100
N Pampa de las Llamas_Kernel	-8.26223e-14	-2	2	-5.42006e-14	-2	2		99.9			99.8
U Pampa de las Llamas_Scale	0.5	9.97466e-18	1	0.727	0.344	1		100			99.8
R_Date UGa-5796	-2101	-2451	-1881	-1940	-2183	-1696		65.7			99.5
R_Date UGa-5462	-1797	-2009	-1618	-1780	-1955	-1615		102			99.8
R_Date UGa-4506	-1765	-1955	-1534	-1754	-1941	-1543		101.9			99.8
R_Date UGa-5797	-1452	-1612	-1292	-1454	-1612	-1302		101.8			99.8
R_Date UGa-5630	-1416	-1605	-1232	-1421	-1603	-1264		103.1			99.8
R_Date UGa-5794	-1409	-1600	-1228	-1416	-1603	-1261		103.3			99.8
R_Date UGa-4511	-1390	-1618	-1128	-1412	-1616	-1229		106.8			99.8
R_Date UGa-5798	-1369	-1609	-1128	-1397	-1610	-1222		107			99.8
R_Date UGa-5873	-1326	-1415	-1223	-1348	-1422	-1235		103.2			99.9
Boundary End Pampa de las Llamas				-1243	-1397	-981					99.6
Sequence
Boundary Start Buena Vista				-2132	-2478	-1903					98.5
KDE_Plot Buena				-1783							100
N Buena_Kernel	-8.26223e-14	-2	2	-4.17661e-14	-2.01	2		100			99.8
U Buena_Scale	0.5	9.97466e-18	1	0.706	0.325	1		100			99.8
R_Date PI-1845	-1638	-1876	-1453	-1681	-1879	-1532		99.5			99.8
R_Date UGAMS- 3129	-1671	-1753	-1562	-1678	-1752	-1613		101.2			99.9
R_Date UGAMS- 3126	-1671	-1753	-1562	-1679	-1752	-1613		101.2			99.9
R_Date UGAMS- 3127	-1706	-1870	-1621	-1710	-1870	-1624		101.4			99.9
R_Date UGAMS- 3128	-1806	-1890	-1693	-1805	-1891	-1693		99.8			99.9
R_Date GX-30695	-1901	-2109	-1744	-1896	-2031	-1746		101.1			99.8
R_Date GX-31276	-2135	-2452	-1907	-2034	-2271	-1776		90.9			99.6
R_Date GX-32177	-2165	-2457	-1947	-2043	-2276	-1779		85.3			99.6
Boundary End Buena Vista				-1593	-1720	-1358					99.3
Sequence
Boundary Start El Paraiso				-1862	-2638	-1647					98.9
KDE_Plot El Paraiso				-1578							100
N El Paraiso_Kernel	-8.26223e-14	-2	2	-5.24242e-14	-2	2.01		100.1			99.8
U El Paraiso_Scale	0.5	9.97466e-18	1	0.82	0.525	1		100			99.9
R_Date Beta-8704	-1198	-1394	-1014	-1254	-1416	-1059		92.4			99.8
R_Date JQ02	-1671	-1747	-1613	-1669	-1746	-1613		100.7			99.9
R_Date JQ10	-1712	-1869	-1626	-1703	-1772	-1626		100.9			99.9
Boundary End El Paraiso				-1105	-1392	-696					99.6
Sequence
Boundary Start Taukachi-Konkan				-1452	-1512	-1420					98.8
KDE_Plot Taukachi-Konkan				-1434							99.8
N Taukachi-Konkan_Kernel	-8.26223e-14	-2	2	0.05	-2.01	2		100			99.8
U Taukachi-Konkan_Scale	0.5	9.97466e-18	1	0.742	0.355	1		100			99.8
R_Date Beta-535191	-1476	-1607	-1411	-1439	-1489	-1412		91.7			99.7
R_Date Beta-427589	-1454	-1528	-1323	-1436	-1488	-1409		116.6			99.8
R_Date Beta-427588	-1445	-1515	-1310	-1435	-1490	-1406		127.3			99.8
R_Date Beta-427587	-1434	-1506	-1305	-1433	-1491	-1402		136.2			99.8
R_Date Beta-535190	-1398	-1496	-1287	-1429	-1490	-1391		114.9			99.7
R_Date Beta-535192	-1423	-1502	-1303	-1432	-1491	-1397		138.6			99.8
R_Date Beta-477229	-1351	-1441	-1261	-1426	-1488	-1383		61.2			99.6
R_Date Beta-477227	-1470	-1602	-1402	-1438	-1490	-1411		98.5			99.7
R_Date Beta- 477228	-1454	-1528	-1323	-1436	-1488	-1409		116.6			99.8
Boundary End Taukachi-Konkan				-1416	-1449	-1359					99
Sequence
Boundary Start Gramalote				-1390	-1699	-1236					98.1
KDE_Plot Gramalote				-1322							99.9
N Gramalote_Kernel	-8.26223e-14	-2	2	-5.59769e-14	-2	2		100			99.8
U Gramalote_Scale	0.5	9.97466e-18	1	0.818	0.522	1		100			99.9
R_Date Beta-321940	-1291	-1414	-1130	-1314	-1409	-1216		108.4			99.8
R_Date Beta-321943	-1351	-1489	-1230	-1332	-1427	-1234		101.5			99.8
R_Date Beta-321945	-1291	-1414	-1130	-1314	-1409	-1216		108.4			99.8
Boundary End Gramalote				-1255	-1399	-968					99.3
Sequence
Boundary Start Chavin				-841	-1033	-772					98.6
KDE_Plot Chavin				-782							99.9
N Chavin_Kernel	-8.26223e-14	-2	2	-6.48587e-14	-2.01	2		99.9			99.8
U Chavin_Scale	0.5	9.97466e-18	1	0.79	0.38	1		100			99.7
R_Date AA69448	-604	-764	-416	-752	-801	-634		81.8			99.9
R_Date AA69449	-646	-802	-490	-767	-808	-625		109.4			99.9
R_Date AA69446	-786	-895	-546	-792	-853	-666		133.3			99.9
R_Date AA69447	-836	-918	-788	-813	-885	-771		104.7			99.9
Boundary End Chavin				-724	-795	-545					99.7
Boundary End Kotosh Religious Tradition				-631	-781	-319					97.7
