# Supplementary material for: Time, Ritual, and Bayesian Reasoning: Charting the Andean Kotosh Religious Tradition
Source: Research Square preprint supplement (doi:10.21203/rs.3.rs-6896121/v1), 2025-07-18
Supplement: Supplementary file 1 [file b682696e0528a212ca44a215.docx]

# Site Descriptions

## The Casma Valley

The Casma Valley, located in costal Ancash, served as the epicenter of the Sechín Alto polity (Thomas Pozorski, Pozorski, & Jave, 2021; Thomas Pozorski & Pozorski, 2018), a socio-political entity that flourished during the Early Formative period. This polity was characterized by a network of interconnected major sites fulfilling administrative, religious, and residential functions. These sites exhibited shared material culture, including standardized ceramic typologies, artifact assemblages, and architectural norms, which underscore a unified socio-political and cultural framework (S. Pozorski & Pozorski, 1998; T. Pozorski & Pozorski, 2005; Thomas Pozorski et al., 2021).

The Sechín Alto polity integrated the KRT, shown by the presence of KRT-associated architectural features at four dated sites within the valley (probably Huaynuná preceded the onset of the Sechín Alto polity, giving its early chronological range). These structures, emblematic of KRT religious practices, highlight the polity’s role in disseminating and perpetuating religious ideologies across the region (Thomas Pozorski & Pozorski, 1996).

### Huaynuná

Huaynuná is located on the north coast of Peru, approximately 13 km north of the Casma Valley. The site covers ~11.5 hectares. Radiocarbon dates from the site, including those associated with the KRT structure, range from 2750 – 1720 Cal BCE [[1]](#footnote-1). This is a multicomponent site that has domestic structures, middens, a public area formed by an irregularly quadrangular hillside structure (T. Pozorski & S. Pozorski, 1990). The architectural configuration of the structure, excluding minor wall segments, is characterized by four terraces faced with stone, which are intersected by a central staircase ascending to a circular depression carved into the hillside bedrock (T. Pozorski & S. Pozorski, 1990), most likely a circular sunken court, characteristically of coastal Late Archaic and Formative sites (Williams, 1980). In addition to these components, a rectangular KRT structure was found at the site. This structure is located within a small stone enclosure, situated atop a low mound approximately 1.5 meters in height, in the northeastern part of the enclosure is oriented slightly east of north. Key architectural features include a ventilation trough (45 cm wide, 140 cm long, 8–17 cm deep) that runs through the entrance of the enclosure, leading to a centrally placed, reddened hearth (70 cm in the north-south direction, 40 cm in the east-west direction, 12 cm deep); the walls of the enclosure (40–50 cm high) are constructed from locally sourced stones set in sandy-silt mortar. The design of the hearth is comparable to those found at highland sites such as Huaricoto, Bahía Seca and La Seductora for example (Mesia-Montenegro & Sanchez-Borjas, 2023; Thomas Pozorski & Pozorski, 1996) which are associated with ritual offerings and ceremonial activities.

### Bahía Seca

Bahia Seca is situated approximately 5 km north of the Casma River. The site is located within the Casma Valley. The site comprises both Late Archaic and Formative components, with the Formative one most significant (where the KRT is placed) (S. Pozorski & T. Pozorski, 1990; S. Pozorski & Pozorski, 1992; Thomas Pozorski & Pozorski, 1996). The main Formative component covers about 2 hectares and was occupied during the period of 1635-1412 Cal BCE. The site is characterized by the presence of a large mound, ceramic-bearing midden deposits, and architectural features indicative of its role as an administrative and ceremonial center.

The central architectural feature is a large mound with an associated plaza. The architectural configuration of the mound summit incorporates a KRT structure, characterized by a central hearth and an associated ventilation system (S. Pozorski & Pozorski, 1992; Thomas Pozorski & Pozorski, 1996) . This structure comprises a circular base, within which a narrow trough lined with stones is centrally positioned. The primary function of this trough was likely to support wooden posts, which would have formed part of a superstructure, such as a roof or framework, over the hearth. The arrangement of wooden posts suggests the presence of a perishable superstructure, such as a roof or enclosure, which would have served to protect the hearth from environmental factors and create a defined space for ceremonial activities (S. Pozorski & T. Pozorski, 1990; S. Pozorski & Pozorski, 1992; Thomas Pozorski & Pozorski, 1996). At Bahía Seca, the KRT structure had a prominent position as reflected by its placement on the large mound’s summit.

### Pampa de las Llamas

Pampa de las Llamas–Moxeke is a Formative site located approximately 18 km inland from the Pacific Ocean within the Casma Valley. Covering 220 hectares, the site is distinguished by its systematic arrangement of non-domestic mounds and enclosures constructed of stone set in mud mortar. Its monumental core is defined by two principal mounds—Huaca A and Moxeke, that face each other along a central axis (S. Pozorski & Pozorski, 1986; S. Pozorski & Pozorski, 1991; S. Pozorski & Pozorski, 1992; Thomas Pozorski & Pozorski, 2018).

At Pampa de las Llamas–Moxeke, KRT-associated structures are not incorporated into the primary ceremonial mounds (Huaca A and Moxeke) but are instead situated within associated administrative and high-status residential areas (Thomas Pozorski & Pozorski, 1996) . Notably, one rectangular KRT structure was excavated adjacent to clusters of rooms along the western side of the complex, and a circular KRT structure is similarly positioned on the west flank. These structures, which provide critical evidence for elite ritual practices, include both rectangular and circular types (Thomas Pozorski & Pozorski, 1996)

The rectangular examples feature a central circular hearth—one measuring approximately 60 cm in diameter and 38 cm deep, lined in stone and partially plastered, with an open ventilation trough extending through its entrance. Another rectangular example, identified as a later modification within an administrative square-room unit, contains a trapezoidal hearth constructed during a subsequent occupation phase. In contrast, the circular ventilated hearth structures are built within round rooms that rest on low rectangular platforms and are vented by four equally spaced subfloor shafts leading to the platform’s edges; one such hearth measures roughly 86 cm in diameter with ventilation shafts about 22 cm wide (Thomas Pozorski & Pozorski, 1996). Radiocarbon dates from the site range from 2036 – 1330 Cal BCE.

The collective analysis of spatial configuration and architectural features associated with the KRT structures indicates that ritualized activities were restricted to the elite operating in circumscribed contexts. This stands in contrast to the large-scale ceremonial activities associated with Mound A and Moxeke, which appear to have functioned as loci for communal rituals accessible to broader segments of the population (S. Pozorski & Pozorski, 1986; S. Pozorski & Pozorski, 1991).

### Taukachi-Konkán

Taukachi‐Konkán is a large, meticulously planned settlement situated on an open pampa measuring approximately 1250 by 500 meters at an elevation of around 150 meters above sea level. The settlement’s spatial organization is based on four aligned platform mound complexes, many of which are oriented toward a prehistoric road entering from the north. Among these, the “Mound of the Columns”—the largest platform mound—is interpreted as a royal residence. This mound is distinguished by a central square‐room unit constructed of robust masonry, incorporating column recesses and carefully engineered entrances restricted by pilasters and wooden bar‐closure mechanisms (S. Pozorski & Pozorski, 1992; Thomas Pozorski & Pozorski, 1993; Thomas Pozorski et al., 2021) .

In addition to its monumental and administrative functions, Taukachi‐Konkán has yielded several small structures associated with the Kotosh Religious Tradition (KRT). These ritual structures were constructed on low, rectangular stone platforms and integrated within room complexes. For example, one structure consists of a circular enclosure originally bounded by an 80‐cm-high stone wall and features a central stone-lined hearth approximately 82 cm in diameter and 59 cm deep, with a 28‐cm-wide lip projecting about 21 cm above the floor. Ventilation is provided by a single open trough—measuring roughly 40–50 cm in width and 18–25 cm in depth—that channels heat and smoke through a northwest-facing entrance, terminating in a circular depression approximately 90 cm in diameter (S. Pozorski & Pozorski, 1992; Thomas Pozorski & Pozorski, 1996) .

Additional examples reveal further variability among these ritual structures. One example comprises a circular room with an inner diameter of approximately 4 m and a similarly high perimeter wall (around 80 cm), situated on a stone platform measuring about 6.3 m square. This structure contains a central hearth measuring approximately 90 cm in diameter and 40 cm deep, ventilated by four equally spaced subfloor shafts that extend to the exterior edges of the supporting platform. The standardized design of these KRT structures, optimized for containing and efficiently venting heat and smoke from a central fire, suggests their function in ritual contexts involving the burning of offerings by relatively small groups (Thomas Pozorski & Pozorski, 1996). Radiocarbon dates from the site range from 1550-1370 Cal BCE.

Collectively, the monumental mounds of Taukachi‐Konkán served multifaceted roles in elite residence, administrative control, and public ceremony, while the integrated KRT structures provide robust evidence for the incorporation of a pan-Andean religious tradition within the settlement’s broader sociopolitical framework.

## The Norte Chico

The Norte Chico, delimited by the rivers Huaura and Fortaleza, including the Supe and Pativilca valleys, covering approximately 120 km of shoreline and an estimated area of 390,000.00 ha. In this area, at least 30 Late Archaic sites with monumental architecture have been identified (Engel, 1987; Haas, Creamer, & Ruiz, 2004a, 2004b; Hass & Creamer, 2004, 2006; Piscitelli, 2017a, 2017b; Ruth Shady, 2006; Ruth Shady, Haas, & Creamer, 2001; Ruth Shady & Leyva, 2003; Vega-Centeno, 2017; Williams, 1980; Williams & Merino, 1979; Zechenter, 1989). These buildings had in common the use of basic architectural units such as rectangular platforms, mounds and circular plazas and had areas that vary from 10 to 400 ha, measuring 15000 to 300000 m³ in volume (Haas et al., 2004b; Hass & Creamer, 2004, 2006). Platforms had stone face retaining walls, up until 4 meters high, filled with shicra bags (bags made of a totora reed strands tied into loosely meshed bags, filled with boulders of different sizes), the succession of platforms formed mounds that could even reach 20 m high, although they had variable height, from site to site and even within a site (Hass & Creamer, 2004; Ruth Shady, 2006; Ruth Shady et al., 2001). As a general pattern, a staircase descended from the top of the mound (where usually an atrium was built) reaching a sunken circular plaza, again with variable diameters, from 15 to 45 m, and from 1 to 3 m deep (Ruth Shady, 2006; Ruth Shady et al., 2001; Williams, 1980; Williams & Merino, 1979).

### Huaricanga

The archaeological site of Huaricanga, situated in the Fortaleza Valley approximately 23 km inland from the Pacific coast multicomponent settlement with occupational phases spanning the Late Archaic and Formative periods (Creamer, Ruiz, Perales, & Haas, 2013; Piscitelli, 2014, 2017a, 2017b). The Late Archaic occupation is most prominently evidenced in Sector C, which features a monumental central mound complex (C1) measuring 285 m x 100 m x 15 m, constituting the largest known structure of its period within the Fortaleza Valley (Creamer et al., 2013). Flanking C1 are smaller subsidiary mounds (C2 and C3), with C3 associated with a circular sunken plaza hallmark of early ceremonial architecture. Additional Late Archaic components include mounds B1, B2, and B3, alongside two circular sunken plazas in Sector B and a potential third plaza north of the central mound (Creamer et al., 2013; Piscitelli, 2014, 2017a, 2017b). Collectively, these elements define Huaricanga as a complex of six platform mounds and up to three sunken plazas. Intensive excavations at Mound B2 have revealed a stratified sequence spanning 3410–2265 Cal BCE, divided into three distinct occupational phases characterized by superimposed rectangular structures. These structures, numbering at least six in a vertically stacked sequence, exhibit architectural parallels to the KRT architecture, including modular room layouts and ritual entombment practices involving intentional structural infilling (Elizabeth Bonnier, 1997; Piscitelli, 2014, 2017a, 2017b).

Current chronological assessments position Huaricanga as the earliest KRT affiliated site in the Central Andes, offering critical insights into the trans-regional diffusion and adaptation of ritual architectures during the Late Archaic (Piscitelli, 2017b).

### Caral

The archaeological site of Caral is situated on the left bank of the Supe Valley approximately 22 km inland from the Pacific coast. The settlement is characterized by a planned architectural ensemble, including monumental platform complexes, sunken circular courts, expansive plazas, and adjacent residential sectors (Ruth Shady, 2006, 2014; Ruth Shady et al., 2001). The site is spatially organized into distinct upper and lower sections, each exhibiting differential architectural elaboration.

The upper section features six monumental pyramidal structures, each accessed via a central staircase and constructed using a modular platform technique involving successive stone-faced terraces. Among these, Pirámide Mayor and Pirámide Central are associated religious-administrative activities. Significantly, this sector incorporates rectangular structures with subterranean ventilation systems, architecturally consistent with the Kotosh Religious Tradition (KRT). In contrast, the lower section contains smaller-scale monumental buildings with rounded KRT structures.

A notable architectural feature is the Templo del Anfiteatro, a rectangular complex comprising interconnected chambers and the site’s largest sunken circular court. This structure is directly linked to a smaller, access-restricted KRT altar (Altar del Fuego Sagrado), implying a ritual spatial hierarchy wherein public ceremonies in the sunken court were complemented by exclusive rituals in the adjacent KRT structure (Ruth Shady, 2004).

Dates available place the site between 2651-2037 BCE, with the site’s formal layout emerging during a major construction phase initiated ~2600 BCE (Ruth Shady & Leyva, 2003).

## Ancash’s highlands

Being the Sechin Alto polity a coastal development from the Ancash region. We decided to place Ancash’s highlands KRT developments in a separate section. There are five dated KRT sites, including the prominent site of La Galgada and the well-known site of Chavin de Huantar.

### La Galgada

La Galgada is situated in the gorge of the Tablachaca valley at an elevation of 1100 meters above sea level and approximately 80 kilometers from the coast, in the Ancash region. The site features three ceremonial complexes that form the nuclei of the settlement (Grieder & Bueno, 1981, 1985). The archaeological site comprises an impressive array of superimposed structures, reminiscent of the KRT mounds at Kotosh. Regrettably, portions of the three mounds have been destroyed by a road traversing the Tablachaca valley.

Bueno and Grieder (Grieder & Bueno, 1981, 1985; Grieder, Bueno, Smith Jr, & Malina, 2012) conducted excavations on the largest mound, which consists of a building with a rectangular base, rounded corners, and a stepped profile reaching 13 meters in height. Adjacent to this mound is a circular sunken plaza. The mound itself is composed of at least five platforms, with the KRT structures situated atop the uppermost platform. Access to these structures was facilitated by a central staircase that traversed all the platforms. They hypothesized that additional structures might be buried within the platforms, like Kotosh (Grieder & Bueno, 1981, 1985; Grieder et al., 2012).

The mound underwent at least four phases of renewal. The earliest KRT structures were discovered on a 13-meter-high terrace, with the authors suggesting the presence of additional structures beneath the terrace floor. These structures differ from those at Kotosh in their rounded corners and the notable architectural finesse (Grieder & Bueno, 1981). Later, a new terrace was added, enveloping the earlier structures. Five new KRT structures were constructed in an asymmetrical arrangement, utilizing cut fieldstones instead of river cobbles. These structures featured rounded corners, a central hearth, a double floor, rectangular niches, and were covered with wooden logs. The walls were finished with white plaster. Ritual entombment practices are observed at La Galgada. KRT dates available place the site between 2700-1350 Cal BCE.

### Huaricoto

The archaeological site of Huaricoto is in the Ancash region, central highlands Peru, within the Callejón de Huaylas valley system. Situated approximately 55 km northwest of Chavín de Huántar, the site occupies an elevated position at 2750 meters above sea level, characterized by a constructed earthen mound measuring six meters in height. Stratigraphic and radiocarbon evidence indicates occupational continuity spanning the Late Archaic through the Formative Period (R. Burger & Salazar, 1980, 1985; R. L. Burger & Salazar-Burger, 1986).

During the Late Archaic phase, Huaricoto exhibits architectural features consistent with the Kotosh Religious Tradition (KRT). However, comparative analysis reveals divergent architectural expressions from contemporaneous KRT sites such as Kotosh and La Galgada. The structures at Huaricoto are typified by modest circular foundations (one to two courses of quarried stone) lacking evidence of elevated walls or log-supported roofing systems, paralleling architectural patterns observed at Piruru (Elizabeth Bonnier, 1983; Elisabeth Bonnier, 1988). No remnants of wattle-and-daub superstructures have been preserved, suggesting either perishable construction materials or post-depositional degradation. Flooring consists of compacted clay substrates, absent the double-flooring or ventilation flutes documented at other KRT complexes.

Huaricoto’s significance lies in its role as a regional variant of KRT cultural practices, demonstrating that ritual architecture in the Central Andes was not exclusively monumental in scale. Eight KRT structures have been identified at the site, three of which date to the Late Archaic. Hearths associated with these structures contained ash, charcoal, faunal remains (including large mammal bones, marine mussel shells, and ichthyofauna), and quartz fragments, sealed beneath clay caps (R. Burger & Salazar, 1980) The chronometric modeling reveals a potential hiatus in activity between 2000–1200 Cal BCE, though this gap may reflect sampling biases in excavation strategies or radiocarbon dataset representativity.

### Chavin

The KRT structure unearthed at Chavín de Huántar, is characterized by several key architectural elements that set it apart. At its center lies a circular hearth, measuring 39 cm in diameter and 11 cm in depth, which is surrounded by a split-level floor, and a lateral bench. The northern entryway of the structure features an exterior step, a partial façade, and a sculptural pillar fragment that flanks the entrance. Additionally, a duct penetrates the bench near the hearth, although it notably lacks the ventilation ducts typically found in earlier KRT structures. The estimated dimensions of the structure are approximately 4 meters by 4 meters, with walls constructed from angular rocks set in mud mortar and coated in smooth, undecorated plaster, likely white or yellow-white in color, with heat-reddened areas around the hearth (Contreras, 2007, 2010) .

The construction and preservation of the structure reveal meticulous craftsmanship. It was built using carefully selected stones and plaster, with evidence suggesting intentional sealing using sterile fill to preserve the structure. Remarkably, the plaster remained intact, although no painted or molded decorations were found. Radiocarbon dating from the structure places the structure's use between 880–690 Cal BCE.

It is located approximately 300 meters west of Chavín de Huántar's monumental core, the structure aligns with the site's ceremonial orientation. It shares construction techniques with the early phases of Chavín, and the artifacts recovered from the site, including obsidian flakes, plainware sherds, and carbonized remains, suggest ritual activities. Notably, the structure was meticulously cleaned before being buried, indicating a deliberate preservation effort (Contreras, 2007, 2010).

### Acshicupoto

The archaeological site of Acshicupoto, part of the Cosma complex in the upper Nepeña Valley, features a Late Archaic ceremonial structure adhering to the KRT. The temple features a meticulously constructed circular sunken chamber (6 m diameter, 2 m depth) with a bipartite floor design: a lower floor (2.9 m diameter) housing a central hearth for ritual offerings and an elevated bench encircling it, demarcating sacred and participatory spaces. Walls, built using coursed river cobbles set in clay mortar and finished with smooth plaster, incorporate six symmetrical niches and stone protrusions, functional or symbolic. Access was tightly controlled via a narrow staircase (75 cm wide) flanked by low walls, suggesting elite oversight of ceremonies (Munro, 2018) . Radiocarbon dates indicate that this KRT structure was used between 2860 – 2500 Cal BCE.

### Hualcayán

Hualcayán, located in the northern Callejón de Huaylas Valley of Ancash, Peru. Archaeological excavations revealed a KRT structure that exhibits an architectural plan characterized by a rectangular layout measuring 12 m in width. Central to the enclosure is a sub rectangular ritual hearth, likely used for fire-related ceremonial practices, which remains preserved beneath deep stratigraphic fill (Bria, 2017). The structure’s construction technique employs alternating courses of large and small ashlar masonry, finished with plastered surfaces. Diagnostic features include a raised internal ledge (dado) and a split-level floor, paralleling architectural elements documented at the highland site of La Galgada (Grieder & Bueno, 1981, 1985; Grieder et al., 2012). Bria accurately notes that Hualcayán, La Galgada, and Huaricoto collectively demonstrate the presence of a cohesive integration typified by rectangular enclosures, with round corners with central hearths, raised ledges (dados), and split-level flooring, which align with broader KRT principles (Bria, 2017). Radiocarbon dates indicate that this KRT structure was used between 2500 – 1100 Cal BCE.

## Huánuco

In this region, there are three dated sites Kotosh, Piruru and Shillacoto. This area is characterized by its proximity to the forest, sites are in lower altitudes compared to the highlands of Ancash and in a more humid environment.

### Kotosh

The site of Kotosh is situated on the eastern slopes of the Central Andes within the Huallaga River basin, a tributary system feeding into the Marañón and the Amazon River. The site comprises two principal mounds: KT, the larger, and KM, the smaller. Mound KT, standing 13 meters in height, is predominantly associated with the KRT (Izumi, 1971; Izumi & Sono, 1963; Izumi & Terada, 1972; Onuki, 1999; Terada & Onuki, 1982). KRT structures are found in the Late Archaic Mito phase, where buildings are characterized by rectangular structures (up to 15 x 15 m) featuring double-tiered floors, niches, ventilation shafts, and central hearths.

KT is organized into three terraced platforms, the lowest platform contains at least seven superimposed Mito-phase structures, with the earliest—White Temple, a twin-chambered structure—underlain by 7 meters of pre-Mito cultural fill. The most iconic KRT structure, the Temple of the Crossed Hands, occupies the second platform. This 9.5 × 9.5 m structure, standing 2 m tall, is renowned for its paired high-relief friezes depicting crossed hands. The temple’s architectural design includes a double floor, a central stone hearth, and sub-floor ventilation flutes to sustain ritual fires. Walls were plastered in red pigment, while interiors featured yellow paint, and the roof utilized wooden beams coated in clay, akin to traditional Andean rural construction. Excavations revealed a meticulous burial process: fine sand covered the Crossed Hands friezes, followed by layers of river cobbles and a 0.6 m cap of light-brown sterile soil (Izumi & Terada, 1972). Bonnier (Elizabeth Bonnier, 1997) interprets this sterile fill as a ritual cleansing act to preserve the sanctity of decommissioned sacred spaces.

Radiocarbon dates from the Mito phase are located between 2443- 1572 Cal BCE, though deeper pre-Mito levels remain undated.

### Piruru

The site of Piruru is situated along the upper banks of the Tantamayo River in the Peruvian highlands at an elevation of 3,800 meters above sea level. Excavations revealed five KRT structures buried under 5 meters of stratigraphic deposits, demonstrating architectural and ritual continuity within the KRT. Among these, Structure P1 exemplifies advanced construction techniques, employing wattle-and-daub walls composed of vertical wooden poles anchored into stone foundation holes, reinforced with clay, and finished with plaster. Its interior adheres to the KRT featuring a bipartite floor system, a central hearth, and an underground ventilation flute, paralleling designs observed at Kotosh and La Galgada (Elizabeth Bonnier, 1983, 1997)

Structures 27 (Unit III) and 28 (Unit V) diverge in form and technique. Structure 27, semicircular (3.5 m inner diameter), incorporates a single floor, a hearth, and potential flute remnants, with walls sufficiently elevated to permit human occupancy. Structure 28, rectangular (3 × 3 m), retains a central hearth but lacks a flute. Stratigraphic superposition indicates that both predate P1, with an earlier circular KRT structure underlying Structure 28. This sequence mirrors ritual entombment practices documented at Kotosh and La Galgada, wherein decommissioned structures were interred beneath sterile, culturally “clean” fills to preserve sanctity (Grieder & Bueno, 1981; Onuki, 1999) .

Chronologically, the KRT structures at Piruru date from 2900-1350 Cal BCE. Architectural diversity is evident: structures vary from rectangular to semicircular, each with a single entrance. Circular constructions, such as those beneath Structure 28, are freestanding yet share adjoining walls—akin to the White Temple at Kotosh—though lacking internal connectivity. All edifices feature hearths containing charcoal and ash deposits, with floors surrounding the hearths intentionally pigmented red, a symbolic practice also documented at Kotosh.

### Shillacoto

The archaeological complex is situated near the confluence of the Huallaga River. Stratigraphic investigations have revealed Early Formative ceramics within the central firepit and on the upper split-level floor (Izumi, Cuculiza, & Kano, 1972). The structure, constructed using large, dressed stone blocks, exhibits a volumetric scale fivefold greater than the largest documented KRT buildings. A singular radiocarbon determination (1800–1200 Cal BCE) (Izumi et al., 1972) positions the Shillacoto as operational during the incipient phases of the Formative period, unlike the ones from Kotosh which only functioned during the Late Archaic period.

## Lima

KRT structures are documented within the Chillón Valley at two distinct sites: the U-shaped architectural complex at El Paraíso and the mid-valley site of Buena Vista. These sites are contemporaneous with the Central Coast U-shaped building tradition, which flourished between approximately 2100 and 500 Cal BCE (Mesia-Montenegro, 2024).

The presence of KRT features in both coastal (El Paraíso) and mid-valley (Buena Vista) contexts underscores the tradition’s adaptability to diverse ecological zones, while retaining core architectural and ritual elements characteristic of the Central Andean Formative period.

### El Paraíso

El Paraíso, situated approximately 2 km inland from the Pacific coast, comprises eleven monumental mounds arranged in a roughly U-shaped configuration (Quilter, 1985). The spatial organization of the site is defined by two parallel, large-scale architectural units (Structures II and VI), separated by 180 meters and flanking a central plaza estimated to exceed 7.2 hectares in area (Quilter, 1985). At the southern periphery of this plaza, Structure I has drawn scholarly attention due to its architectural affinities with the KRT. Yet, El Paraíso’s Structure I diverges from canonical KRT design through the absence of a central hearth, suggesting either regional variation or functional distinctions in ritual practice (Mesia-Montenegro, 2024; Quilter, 1985). Coastal manifestations of the KTR, as observed in the Norte Chico region, often coexist with expansive platform mounds and circular plazas, underscoring adaptive architectural syncretism between highland religious traditions and coastal monumentality. The KRT structure at EL Paraíso was used between 2000-1200 Cal BCE

El Paraíso’s ecological context further illuminates its socio-economic foundations. Proximity to marshlands and lomas ecosystems—fog-dependent coastal oases supporting endemic flora and fauna—provided critical subsistence resources, as evidenced by pollen analysis (Caramanica, Quilter, Huaman, Villanueva, & Morales, 2018; Ravines, Engelstad, Palomino, & Sandweiss, 1982). This aligns with botanical data from contemporaneous sites such as Garagay, where swamp-adjacent settlement patterns facilitated resource diversification (Ravines et al., 1982). Microbotanical remains from El Paraíso additionally correlate with a significant El Niño Southern Oscillation (ENSO) event circa 1750–1650 Cal BC, identified through sedimentological proxies indicative of abrupt hydroclimatic shifts (Caramanica et al., 2018). This climatic perturbation coincides with the site’s occupational zenith, suggesting adaptive resilience to environmental volatility through diversified resource procurement strategies.

### Buenavista

Buena Vista is located 36 km inland from the ocean in the middle Chillón valley. Despite its proximity to El Paraíso, Buena Vista exhibits distinct architectural characteristics, featuring rectangular stone constructions arranged along two elongated mounds instead of an U-shaped distribution (Robert A Benfer & Laura, 2019; Robert Alfred Benfer et al., 2007; Ojeda, Quispe, & Benfer, 2023).

Crucially, Buena Vista displays several defining attributes of the Kotosh Religious Tradition (KRT). Two temples at the site—named as the Temple of the Fox and the Temple of the Menacing Disk (named for its sculptural decoration)—are positioned atop platform pyramids constructed from dressed stone. Within the Temple of the Fox, a small complex of stone rooms incorporating a ventilated hearth makes up the Temple of the Moon, a feature that may reflect KRT-related ritual practice. In addition, the Temple of the Fox includes a square-shaped area named the Chamber of Offerings, where various objects were deposited. As noted by Benfer et al. (Robert Alfred Benfer et al., 2007), this architectural design, along with other features, associates the site with KRT structures dated between 2200-1600 Cal BCE.

Thus, the architectural and ceremonial evidence at Buena Vista—particularly the presence of rectangular chambers with ventilated hearths in both the Temple of the Moon and the Temple of the Fox—strongly aligns it with the KRT.

## La Libertad

### Gramalote

Gramalote is an early residential and fishing settlement located on a 13‐meter-high marine terrace overlooking the Huanchaquito beach on Peru’s north coast (Prieto, 2014, 2015) . Occupying an estimated 3.5 hectares, the site is divided into distinct domestic and ceremonial sectors. The domestic area, situated in the southwest, housed approximately 300 inhabitants. In contrast, the public area occupies the northeast sector and spans over 1000 m² (Prieto, 2018a). Constructed with stone walls set in mud mortar and finished with plaster, this area is a well-defined rectangular edifice whose principal axis is oriented northwest (Prieto, 2018b) .

A central rectangular room functions as the focal point for communal ritual activities. This building is defined by a carefully constructed rectangular hearth that differs in form from domestic hearths, suggesting its deliberate use in ritual contexts. The hearth—surrounded by benches and punctuated by four circular recesses near the plaza’s corners— appears designed to channel the heat and smoke of a permanently burning fire, a defined trait of the KRT (Prieto, 2014, 2018b) . Although the scale of the area is modest compared to regional monumental centers (like those in the Casma valley), its architectural organization and material culture indicate that Gramalote exemplifies a localized adaptation of the KRT, integrating public ceremonial functions with the everyday domestic and economic life during the Formative period. Dates associated with the KRT structure are between 1500 – 1250 Cal BCE.

## Cajamarca

The Cajamarca region, situated in northern Peru near the Ecuadorian border within the Andean highlands, is renowned for its archaeologically significant Formative period sites. Notable examples include Pacopampa, Huacaloma, Kuntur Wasi, Pandanche, and Layzón. Among these, only Huacaloma features a Kotosh Religious Tradition (KRT) structure, located 4 km northeast of the modern city of Cajamarca. This distinction underscores Huacaloma’s unique role in the regional adoption and adaptation of KRT architecture.

### Huacaloma

The archaeological site of Huacaloma is situated in the Cajamarca Basin of the northern Andean highlands, at an elevation of 2,700 meters above sea level. KRT structure at this site is constructed atop sterile soil and comprises a rectangular chamber measuring 5.5 x 3.9 meters, built from volcanic tuff blocks and finished with white clay plaster (Terada & Onuki, 1982) . This plaster was uniformly applied to the walls and floor of the chamber. A semi-subterranean hearth, positioned centrally within the space, is associated with ceramic artifacts typifying the local Early Huacaloma phase (Terada & Onuki, 1982) . Radiocarbon dating places the KRT structure’s occupation between 1450–850 Cal BCE. Following its use, the chamber was intentionally buried beneath a two-meter-thick clay fill, forming a stepped platform. As the northernmost known KRT site, Huacaloma underscores the tradition’s geographic reach and adaptive integration into highland ceremonial landscapes (Seki, 1998) .

## References

Benfer, R. A., & Laura, L. (2019). A Stone Pillar of a Condor Marked the Equinox at the Site of Buena Vista, Peru, at 2200 BC. *Journal of Skyscape Archaeology, 5*(2), 123-150.

Benfer, R. A., Ojeda, B., Duncan, N. A., Adkins, L. R., Ludeña, H., Vallejos, M., . . . Villarreal, G. (2007). La tradición religioso-astronómica en Buena Vista. *Boletín de Arqueología PUCP*(11), 53-102.

Bonnier, E. (1983). Piruru: Nuevas Evidencias de la Ocupación Temprana en Tantamayo, Perú. *Gaceta Arqueológica Andina, 8*, 8-10.

Bonnier, E. (1988). Arquitectura precerámica en la cordillera de los Andes, Piruru frente a la diversidad de los datos. *Anthropologica del Departamento de Ciencias Sociales, 6*(6), 335-361.

Bonnier, E. (1997). Preceramic Architecture in the Andes: The Mito Tradition. In E. Bonnier & H. Bischof (Eds.), *Archaeologica Peruana 2* (pp. 120-144). Mannheim.

Bria, R. E. (2017). *Ritual, economy, and the construction of community at Ancient Hualcayán (Ancash, Peru).*

Burger, R., & Salazar, L. (1980). Ritual and Religion at Huaricoto. *Archaeology, 33*(6), 26-32.

Burger, R., & Salazar, L. (1985). The Early Ceremonial Center of Huaricoto. In C. Donnan (Ed.), *Early Ceremonial Architecture at the Andes* (pp. 111-138). Washington: Dumbarton Oaks.

Burger, R. L., & Salazar-Burger, L. (1986). Early organizational diversity in the Peruvian highlands: Huaricoto and Kotosh. *Andean archaeology: papers in memory of Clifford Evans*, 65-82.

Caramanica, A., Quilter, J., Huaman, L., Villanueva, F., & Morales, C. R. (2018). Micro-remains, ENSO, and environmental reconstruction of El Paraíso, Peru, a late preceramic site. *Journal of Archaeological Science: Reports, 17*, 667-677.

Contreras, D. (2007). *Geomorphologic and Sociopolitical Change at Chavín de Huantar.* (Ph.D Ph.D Dissertation). Stanford University, Stanford.

Contreras, D. (2010). A Mito Style Structure at Chavín de Huántar: Dating and Implications. *Latin American Antiquity, 21*(1), 1-19.

Creamer, W., Ruiz, A., Perales, M., & Haas, J. (2013). The Fortaleza Valley, Peru: Archaeological Investigation of Late Archaic Sites (3000–1800 BC). *Fieldiana Anthropology*, 1-108.

Engel, F. (1987). *De las Begonias al maíz: Vida y producción en el antiguo Perú*. Lima: Centro de Investigaciones de Zonas Áridas. Universidad Nacional Agraria La Molina.

Grieder, T., & Bueno, A. (1981). La-Galgada-Peru Before Pottery. *Archaeology, 34*(2), 44-51.

Grieder, T., & Bueno, A. (1985). Ceremonial architecture at La Galgada. In C. Donnan (Ed.), *Early ceremonial architecture in the Andes* (pp. 93-109). Washington: Dumbarton Oaks Research Library and Collection.

Grieder, T., Bueno, A., Smith Jr, C., & Malina, R. (2012). *La Galgada, Peru: A preceramic culture in transition*: University of Texas Press.

Haas, J., Creamer, W., & Ruiz, A. (2004a). Dating the Late Archaic occupation of the Norte Chico region in Peru. *Nature, 432*(7020), 1020-1023. Retrieved from <http://dx.doi.org/10.1038/nature03146>

<http://www.nature.com/nature/journal/v432/n7020/suppinfo/nature03146_S1.html>

Haas, J., Creamer, W., & Ruiz, A. (2004b). Power and the Emergence of Complex Polities in the Peruvian Preceramic. *Archeological Papers of the American Anthropological Association, 14*(1), 37-52.

Hass, J., & Creamer, W. (2004). Cultural transformations in the Central Andean Late Archaic. In H. Silverman (Ed.), *Andean Archaeology* (pp. 35-50). Malden: Blackwell

Hass, J., & Creamer, W. (2006). Crucible of Andean Civilization: The Peruvian Coast from 3000 to 1800 BC. *Current Anthropology, 47*(5), 745-776.

Izumi, S. (1971). *The development of the Formative culture in the Ceja de Montana: a viewpoint based on the materials from the Kotosh site.* Paper presented at the Dumbarton Oaks Conference on Chavín.

Izumi, S., Cuculiza, P., & Kano, C. (1972). *Excavations at Shillacoto, Huanuco, Peru*. Tokyo: The University Museum University of Tokyo.

Izumi, S., & Sono, T. (1963). *Andes 2, Excavations at Kotosh Peru 1960*. Tokyo: University of Tokyo.

Izumi, S., & Terada, K. (1972). *Andes 4 excavations at Kotosh, Peru, 1963 and 1966*: University of Tokyo Press.

Mesia-Montenegro, C. (2024). Untangling the chronological complexities of the Andean Central Coast Formative Period: A Bayesian reassessment. *Journal of Archaeological Science: Reports, 59*, 104799.

Mesia-Montenegro, C., & Sanchez-Borjas, A. (2023). Embedded religiousness and the Kotosh religious tradition in highland Peru: the site of La Seductora. *Antiquity, 97*(392), 367-385.

Munro, K. E. (2018). Landscapes of Persistence and Ritual Architecture at the Cosma Complex, Upper Nepeña Valley, Peru.

Ojeda, B., Quispe, A. O., & Benfer, R. A. (2023). Astronomical Alignments from Structures Surrounding Giant Animal Effigy Mounds at El Paraiso, Peru. *Latin American Antiquity*, 1-19.

Onuki, Y. (1999). El periodo arcaico en Huánuco y el concepto del arcaico. *Boletín de Arqueología PUCP*(3), 325-333.

Piscitelli, M. (2014). *Ritual is Power? Late Archaic Small-Scale Ceremonial Architecture in the Central Andes.* University of Illinois at Chicago,

Piscitelli, M. (2017a). Pathways to Social Complexity in the Norte Chico Region of Peru. In *Feast, Famine or Fighting?* (pp. 393-415): Springer.

Piscitelli, M. (2017b). Ritual is power? Religion as a possible base of power for early political actors in ancient Peru. In *Religion and Politics in the Ancient Americas* (pp. 205-225): Routledge.

Pozorski, S., & Pozorski, T. (1986). Recent Excavations at Pampa De Las Llamas-Moxeke, a Complex Initial Period Site in Peru. *Journal of Field Archaeology, 13*(4), 381-401. Retrieved from <Go to ISI>://A1986F281900002

Pozorski, S., & Pozorski, T. (1990). Reexamining the Critical Preceramic Ceramic Period Transition - New Data from Coastal Peru. *American Anthropologist, 92*(2), 481-491. Retrieved from <Go to ISI>://A1990DK46600015

Pozorski, S., & Pozorski, T. (1991). Storage, Access Control and Bureocratic Proliferation: Understanding the Initial Period (1800-900 B.C.). Economy at Pampa de las Llamas-Moxeque, Casma valley, Peru. *Research in Economic Anthropology, 13*, 341-371.

Pozorski, S., & Pozorski, T. (1992). Early Civilization in the Casma Valley, Peru. *Antiquity, 66*(253), 845-870. Retrieved from <Go to ISI>://A1992KC28800002

Pozorski, S., & Pozorski, T. (1998). La Dinámica del Valle de Casma durante el Período Inicial. *Boletín de Arqueología PUCP, 2*, 83-100.

Pozorski, T., & Pozorski, S. (1990). Huaynuna, a Late Cotton Preceramic Site on the North Coast of Peru. *Journal of Field Archaeology, 17*(1), 17-26. Retrieved from <Go to ISI>://A1990EA36400002

Pozorski, T., & Pozorski, S. (1993). Early complex society and ceremonialism on the Peruvian north coast. *Senri ethnological studies, 37*, 45-68.

Pozorski, T., & Pozorski, S. (1996). Ventilated hearth structures in the Casma Valley, Peru. *Latin American Antiquity, 7*(4), 341-353.

Pozorski, T., & Pozorski, S. (2005). Architecture and chronology at the site of Sechin Alto, Casma Valley, Peru. *Journal of Field Archaeology, 30*(2), 143-161. Retrieved from <Go to ISI>://000230348900002

Pozorski, T., Pozorski, S., & Jave, R. M. (2021). Recent Excavations at the Initial Period Site of Taukachi-Konkán, Casma Valley, Peru. *Ñawpa Pacha, 41*(1), 47-142.

Pozorski, T., & Pozorski, S. J. J. o. A. R. (2018). Early Complex Society on the North and Central Peruvian Coast: New Archaeological Discoveries and New Insights. *26*(4), 353-386.

Prieto, G. (2014). The early initial period fishing settlement of Gramalote, Moche Valley: a preliminary report. *Peruvian Prehistory, 1*(1), 1-46.

Prieto, G. (2015). *Gramalote: Domestic life, economy and ritual practices of a Prehispanic maritime community*: Yale University.

Prieto, G. (2018a). The social dynamics and economic interactions of the households at Gramalote, a small-scale residential settlement during the second millennium BC on the north coast of Peru. *Latin American Antiquity, 29*(3), 532-551.

Prieto, G. (2018b). The temple of the fishermen: early ceremonial architecture at Gramalote, a residential settlement of the second millennium BC, north coast of Peru. *Journal of Field Archaeology, 43*(3), 200-221.

Quilter, J. (1985). Architecture and chronology at El Paraiso, Peru. *Journal of Field Archaeology, 12*(3), 279-297.

Ravines, R., Engelstad, H., Palomino, V., & Sandweiss, D. (1982). Materiales Arqueológicos de Garagay. *Revista del Museo Nacional, 46*, 135-233.

Seki, Y. (1998). El Periodo Formativo en el Valle de Cajamarca. *Boletín de Arqueología PUCP, 2*, 147-160.

Shady, R. (2004). *Caral: La Ciudad del Fuego Sagrado*. Lima: Centura.

Shady, R. (2006). America’s First City? The Case of Late Archaic Caral. In W. H. Isbell & H. Silverman (Eds.), *Andean Archaeology III: North and South* (pp. 28-66). Boston, MA: Springer US.

Shady, R. (2014). La civilización Caral: Paisaje cultural y sistema social. In Y. Seki (Ed.), *El Centro Ceremonial Andino. Nuevas perspectivas para los periodos Arcaico y Formativo* (Vol. 89, pp. 51-103). Osaka: Senri Ethnological Studies.

Shady, R., Haas, J., & Creamer, W. (2001). Dating Caral, a Preceramic Site in the Supe Valley on the Central Coast of Peru. *Science, 292*(5517), 723-726. doi:10.1126/science.1059519

Shady, R., & Leyva, C. (Eds.). (2003). *La Ciudad Sagrada de Caral-Supe: Los Origines de la Civilización Andina y la Formación del Estado Prístino en el Antiguo Perú* (First ed.). Lima: Instituto Nacional de Cultura.

Terada, K., & Onuki, Y. (1982). *Excavations at Huacaloma in the Cajamarca Valley, Peru 1979* (First ed.). Tokyo: University of Tokyo Press.

Vega-Centeno, R. (2017). El Período Arcaico Tardío en perspectiva regional. Nuevos aportes. In *Repensar el antiguo Perú. Aportes desde la arqueología* (pp. 85-119): Instituto de Estudios Peruanos.

Williams, C. (1980). Arquitectura y Urbanismo en el Antiguo Perú. In J. Mejía Baca (Ed.), *Historia del Perú* (Vol. 8, pp. 369-385). Lima: Editorial Mejía Baca.

Williams, C., & Merino, M. (1979). *Inventario, Catastro y Delimitación del Patrimonio Arqueológico del valle de Supe*. Lima.

Zechenter, E. M. (1989). *Subsistence strategies in the Supe Valley of the Peruvian Central coast during the Complex Preceramic and Initial Periods.* (Ph.D Doctoral Dissertation). University of California, Los Angeles,

1. Subsequently, for all indicated ranges, the modeled Median (M) values shall be utilized to determine the respective starting and ending boundaries. [↑](#footnote-ref-1)
