# Supplementary material for: Time, Ritual, and Bayesian Reasoning: Charting the Andean Kotosh Religious Tradition
Source: Research Square preprint supplement (doi:10.21203/rs.3.rs-6896121/v1), 2025-07-18
Supplement: Supplementary file 2 [file 4712bad6d603db855ac5a9ae.xlsx]

## Sheet: Model A
	Site	Lab	14C BP	Standard Deviation	Delta 13 Correction	Material	Latitude	Longitude	Reference	Context	KRT	CH	MT o KRT
1	Huaricanga	AA84560	4023	42	-22.8	Plant fiber	-10.5	-77.76	Piscitelli, 2014	Phase 01. Unit 9 H2-I2 C-Fl. 4. (Floor 18)	SI	1	KRT
2	Huaricanga	AA102184	4702	70	-20.2	Plant fiber	-10.5	-77.76	Piscitelli, 2014	Phase 01. Unit III A2 E-Fl. 1a. (Floor 31b)	SI	1	KRT
3	Huaricanga	AA102179	4403	72	-18.4	Plant fiber	-10.5	-77.76	Piscitelli, 2014	Phase 02. Unit III A3 D-Fl. 1 (Floor 23)	SI	1	KRT
4	Huaricanga	AA102180	3950	34	-12.01	Plant fiber	-10.5	-77.76	Piscitelli, 2014	Phase 02. Unit III n/a D-Fl. 3a (Floor 22a)	SI	1	KRT
5	Huaricanga	AA102181	3950	42	-26.2	Plant fiber	-10.5	-77.76	Piscitelli, 2014	Phase 02. Unit III n/a D-Fl. 2b (Floor 24b)	SI	1	KRT
6	Huaricanga	AA102182	3937	34	-12.2	Plant fiber	-10.5	-77.76	Piscitelli, 2014	Phase 02. Unit III n/a D-Fl. 3a (Floor 22a)	SI	1	KRT
7	Huaricanga	AA102185	4437	80	-20.2	Plant fiber	-10.5	-77.76	Piscitelli, 2014	Phase 02. Unit III A2 D-Fl. 1 (Floor 23)	SI	1	KRT
8	Huaricanga	AA84551	3926	43	-12.5	Plant fiber	-10.5	-77.76	Piscitelli, 2014	Phase 04. Unit 7 F7-F8 A-Fl. 1a (Floor 6a)	SI	1	KRT
9	Huaricanga	AA84552	3899	43	-12.5	Plant fiber	-10.5	-77.76	Piscitelli, 2014	Phase 04. Unit 7 n/a A-Fl. 1b (Floor 6b)	SI	1	KRT
10	La Galgada	TX4450	3820	100	100	Charcoal	-8.45	-78.15	Grieder & Bueno 1981	Sec F12/B2, chamber, from Preceramic firepit fill in center of floor, in one of first buildings S of North Mound	SI	3	MT
11	La Galgada	TX3167	3820	60	100	Wood charbonized	-8.45	-78.15	Grieder & Bueno 1981	Fire pit in Floor 25, Sec D1, Sq D6	SI	2	MT
12	La Galgada	TK4449	3790	70	100	Charcoal	-8.45	-78.15	Grieder & Bueno 1981	Sec E12/I2, debris on Floor 20, interior of Preceramic period chamber in one of first buildings S of North Mound	SI	2	MT
13	La Galgada	TK4448	3650	60	100	Charcoal	-8.45	-78.15	Grieder & Bueno 1981	Sec H11/EG9, Floor 20, from firepit fill	SI	2	MT
14	La Galgada	UGa4583	3590	75	?	Charcoal	-8.45	-78.15	Grieder & Bueno 1981	Sec H11/EF10, Floor 30, from firepit fill in center of principal ritual chamber of North Temple	SI	3	MT
15	La Galgada	TX-2463	3470	90	100	Charcoal	-8.45	-78.15	Grieder & Bueno 1981	From middden, base of massive wall, N gallery, Mound B	NO	2	MT
16	La Galgada	TX-2464	3440	80	100	Wood maguey	-8.45	-78.15	Grieder & Bueno 1981	From shaft wall leading to tomb built into temple after all floors had been constructed, S Gallery, Mound B, Phase 5	NO	2	MT
17	La Galgada	TX-3166	3660	80	100	Wood carbonized	-8.45	-78.15	Grieder & Bueno 1981	Fire pit in Floors 3, 5, 7, Sec C1, Sq J6	SI	2	MT
18	La Galgada	TX-3663	3540	50	100	Charcoal	-8.45	-78.15	Grieder & Bueno 1981	Sec G11/G8, pit in Floor 9, S wing of North Mound, 2 m below top of mound	NO	2	MT
19	La Galgada	TX-3664	4110	50	100	Charcoal	-8.45	-78.15	Grieder & Bueno 1981	1-11:D-5, related to floor 40	SI	4	MT
20	La Galgada	TX-4446	3130	80	100	Charcoal	-8.45	-78.15	Grieder & Bueno 1981	Sec G12/H4, Floor 8, fire pit	SI	2	MT
21	La Galgada	TX-4447	3670	70	100	Charcoal	-8.45	-78.15	Grieder & Bueno 1981	Sec H11/EF10, Floor 30, from firepit fill in center of principal ritual chamber of North Temple	SI	2	MT
22	La Galgada	TX-5606	3320	270	100	Textile cotton cloth	-8.45	-78.15	Grieder & Bueno 1981	Sec H11/G7, on Floor 11 fill, Initial period cache	NO	3	MT
23	Huaricoto	I-11142	3970	110	100	?	-9.3	-77.6	Burger & Salazar-Burger 1985	Sector III, from the lowest of two superimposed ceremonial hearths, deep approx. 2.70 m, overlaying a layer of thick red clay. Phase Chaukayan	SI	3	MT
24	Huaricoto	I-11151	2310	110	100	?	-9.3	-77.6	Burger & Salazar-Burger 1985	From sectors IVC and IVE, associated with late Capilla ceramics. Phase Late Capilla	SI	3	MT
25	Huaricoto	I-11152	3910	110	100	?	-9.3	-77.6	Burger & Salazar-Burger 1985	Sector III, from the Ceremonial Hearth XII	SI	4	MT
26	Huaricoto	PUCP-XX1	4210	120	100	?	-9.3	-77.6	Burger & Salazar-Burger 1985	Sector I A, from a semicircular hearth XIII plastered with a light clay. Phase Chaukayan	SI	3	MT
27	Huaricoto	Tx-3580	4600	180	100	Charcoal	-9.3	-77.6	Burger & Salazar-Burger 1985	Small quantities of Early Horizon ?(i.e., Capilla style) pottery within the matrix of nearby monumental wall, and stratified ceramics to the east of that construction.Phase Late Capilla	SI	3	MT
28	Huaricoto	Tx-3581	4770	200	100	?	-9.3	-77.6	Burger & Salazar-Burger 1985	From a layer of red-colored clay without distinctive artifactual materials a the deep of approx. 2.70 m. The deposition of the sample ?probably predated the use of the site as a religious center. Compare to I-11142.	SI	3	MT
29	Huaricoto	Tx-3582	2540	130	100	?	-9.3	-77.6	Burger & Salazar-Burger 1985	From sectors IVC and IVE, associated with late Capilla ceramics. Phase Late Capilla	SI	3	MT
30	Huaricoto	Tx-3583	2330	80	100	?	-9.3	-77.6	Burger & Salazar-Burger 1985	From sectors IVC and IVE, associated with late Capilla ceramics. Phase Late Capilla	SI	3	MT
31	Caral	Beta-132593	3640	50	?	Plant fiber	-10.89	-79.52	Shady et al 2001	Construction fill of atrium on top of Piramide Mayor, Caral	SI	2	MT
32	Caral	ISGS-4724	3730	70	?	Plant fiber	-10.89	-79.52	Shady et al 2001	Construction fill of atrium on top of Piramide Mayor, Caral	SI	2	MT
33	Caral	Beta-134427	3740	90	?	Plant fiber	-10.89	-79.52	Shady et al 2001	Offering inside room on top of Piramide Mayor, Caral	SI	2	MT
34	Caral	ISGS-4738	3740	80	?	Plant fiber	-10.89	-79.52	Shady et al 2001	Floor construction center of stratified trash, rear of Sector N, Caral	NO	2	MT
35	Caral	ISGS-4740	3810	70	?	Plant fiber	-10.89	-79.52	Shady et al 2001	Upper level stratified trash, rear of Sector N, Caral	NO	2	MT
36	Caral	Beta-132589	3820	60	?	Plant fiber	-10.89	-79.52	Shady et al 2001	Upper level stratified trash, Sector A, Caral	NO	2	MT
37	Caral	ISGS-4710	3840	70	?	Plant fiber	-10.89	-79.52	Shady et al 2001	Wall construction around sunken circular plaza in front of Piramide Mayor, Caral	NO	2	MT
38	Caral	GS-4726	3900	70	?	Plant fiber	-10.89	-79.52	Shady et al 2001	Platform construction in front of Sector C, Caral	NO	2	MT
39	Caral	ISGS-4727	3960	110	?	Plant fiber	-10.89	-79.52	Shady et al 2001	Stratum under the platform in front of Sector C, Caral	NO	2	MT
40	Caral	ISGS-4733	3960	80	?	Plant fiber	-10.89	-79.52	Shady et al 2001	Lower level stratified trash, Sector A, Caral	NO	2	MT
41	Caral	ISGS-4734	3970	90	?	Plant fiber	-10.89	-79.52	Shady et al 2001	Lower floor on top of wall around sunken circular platform, Sector L, Caral	NO	2	MT
42	Caral	Beta-134429	3970	40	?	Plant fiber	-10.89	-79.52	Shady et al 2001	Lowest level (7) stratified trash, in rear of Sector N, Caral	NO	2	MT
43	Caral	ISGS-4729	3990	70	?	Plant fiber	-10.89	-79.52	Shady et al 2001	Floor contact residential architecture, Sector A, Caral	NO	2	MT
44	Caral	ISGS-4732	3990	70	?	Plant fiber	-10.89	-79.52	Shady et al 2001	Upper level stratified trash, Sector A, Caral	NO	2	MT
45	Caral	Beta-134428	4020	40	?	Plant fiber	-10.89	-79.52	Shady et al 2001	Upper level (3) stratified trash, rear of Sector N, Caral	NO	2	MT
46	Caral	ISGS-4736	4060	70	?	Plant fiber	-10.89	-79.52	Shady et al 2001	Lowest level stratified trash, rear of Sector N, Caral	NO	2	MT
47	Caral	ISGS-4711	4090	90	?	Plant fiber	-10.89	-79.52	Shady et al 2001	Stratum under sunken circular plaza in front of Piramide Mayor, Caral	NO	2	MT
48	Caral	Beta-184980	3630	70	?	?	-10.89	-79.52	Shady 2006	Platform fill, Pyramid of the Gallery, Sector H, Caral	NO	3	MT
49	Caral	Beta-184982	3690	110	?	?	-10.89	-79.52	Shady 2006	Platform fill, Pyramid of the Amphitheater, Sector L, Caral	NO	3	MT
50	Caral	Beta-184984	3700	60	?	?	-10.89	-79.52	Shady 2006	Platform fill, Sector E, Caral	NO	3	MT
51	Caral	Beta-184979	3800	70	?	?	-10.89	-79.52	Shady 2006	Platform fill, Pyramid of the Circular Altar, Sector P, Caral	NO	3	MT
52	Caral	Beta-184981	3830	70	?	?	-10.89	-79.52	Shady 2006	Domestic unit of Sector NN2, Caral	NO	3	MT
53	Caral	Beta-184977	3990	70	?	?	-10.89	-79.52	Shady 2006	Wall of the Quary Pyramid, Sector B, Caral	NO	3	MT
54	Caral	Beta-184983	4040	80	?	?	-10.89	-79.52	Shady 2006	Room of the Central Plaza, Sector Z, Caral	NO	3	MT
55	Caral	Beta-184985	4060	70	?	?	-10.89	-79.52	Shady 2006	Domestic unit of Sector I, Caral	NO	3	MT
56	Caral	Beta-184973	4160	70	?	?	-10.89	-79.52	Shady 2006	Domestic unit of Sector I, Caral	NO	3	MT
57	Kotosh	TK-109	3360	160	100	Charcoal	-9.93	-76.28	Izumi & Terada 1972	KT mound, Mito phase	SI	3	MT
58	Kotosh	TK-110	3470	80	100	Charcoal	-9.93	-76.28	Izumi & Terada 1972	KT mound, Mito phase	SI	3	MT
59	Kotosh	GaK-766a	3620	100	100	?	-9.93	-76.28	Izumi & Terada 1972	KT mound, Mito phase	SI	4	MT
60	Kotosh	GaK-766b	3900	100	100	?	-9.93	-76.28	Izumi & Terada 1972	KT mound, Mito phase	SI	4	MT
61	Kotosh	TK-42	3900	900	100	Charcoal	-9.93	-76.28	Izumi & Terada 1972	Temple ER-26	SI	2	MT
62	Gramalote	Beta-321940	3080	40	100	Charcoal	-7.89	-72.79	Prieto 2018	Kotosh like structure. The date is based on a sample from a circular hearth filled with vegetal charcoal	SI	1	KRT
63	Gramalote	Beta-321943	3140	40	-26	Charcoal	-7.89	-72.79	Prieto 2018	Public Architectural Compound (PAC). Contemporary with the Kotosh like structure.	NO	1	KRT
64	Gramalote	Beta-321945	2850	80	100	Charcoal	-7.89	-72.79	Prieto 2018	Public Architectural Compound (PAC). Contemporary with the Kotosh like structure.	NO	1	KRT
65	El Paraiso	Beta-8704	3020	60	100	Charcoal	-11.953	-77.1183	Quilter, 1985	From midden, Unit I, Pit 2, Level G (30-40 cm)	SI	2	KRT
66	El Paraiso	P-1209	3065	61	100	Plant fragments	-11.953	-77.1183	Engel, 1966	Unit I, early phase. From mortar which cemented stones of N main wall of Unit I	SI	3	KRT
67	El Paraiso	P-1210	3366	59	100	Shicra	-11.953	-77.1183	Engel, 1967	Unit I, late phase. From rubble fill of room of Unit I	SI	3	KRT
68	El Paraiso	JQ02	3420	20	?	Charred seed	-11.953	-77.1183	Caramanica et al, 2019	Unit I, Pit 2, Level J	SI	1	KRT
69	El Paraiso	P-1214	3444	59	100	Charcoal	-11.953	-77.1183	Engel, 1967	From refuse and ash deposit on mud floor around building, Unit I, early phase of middle occupation period,	SI	3	KRT
70	El Paraiso	JQ10	3455	20	?	Charred seed	-11.953	-77.1183	Caramanica et al, 2019	Unit I, Pit 2, Level G	SI	1	KRT
71	El Paraiso	I-13275	3550	100	100	Charcoal	-11.953	-77.1183	Quilter, 1985	From midden, Unit I, Pit 2, Level G (30-40 cm). Shicra bag 11.	SI	2	KRT
72	El Paraiso	I-13276	3560	100	100	Charcoal	-11.953	-77.1183	Quilter, 1985	From midden, Unit I, Pit 2, Level B (0-10 cm)	SI	2	KRT
73	El Paraiso	I-1676	3570	150	100	Cinders found on stairs	-11.953	-77.1183	Engel, 1967	Unit I. From final phase of the construction	SI	3	KRT
74	Buena Vista	GX-32177	3790	80	?	Charcoal	-11.731	-76.9681	Benfer & Laura, 2019	Offering Chamber, Temple of the Fox, Level 400, carbonised twigs below level of rocks	SI	1	KRT
75	Buena Vista	GX-31276	3770	80	?	Charcoal	-11.731	-76.9681	Benfer & Laura, 2019	Offering Chamber, Temple of the Fox, Level 300, carbonized twigs below level of rocks	SI	1	KRT
76	Buena Vista	UGAMS- 2685	3600	30	?	Plant fragments	-11.731	-76.9681	Benfer & Laura, 2019	Solstice light chamber, plant fibers from mud plaster from fallen fragments of ceiling		1
77	Buena Vista	GX-31920	3660	90	?	Plant fragments	-11.731	-76.9681	Benfer & Laura, 2019	Temple of the Menacing Disk, plant fibers from mud plaster in the base of the sculpture		1
78	Buena Vista	UGAMS- 3128	3520	25	?	Charcoal	-11.731	-76.9681	Benfer & Laura, 2019	Temple of El Paraíso del Valle, carbonized twigs from a central hearth in Level 400	SI	1	KRT
79	Buena Vista	UGAMS- 3127	3450	25	?	Charcoal	-11.731	-76.9681	Benfer & Laura, 2019	Temple of El Paraíso del Valle, carbonized twigs from a central hearth in Level 300	SI	1	KRT
80	Buena Vista	UGAMS- 3126	3420	25	?	Charcoal	-11.731	-76.9681	Benfer & Laura, 2019	Temple of El Paraíso del Valle, carbonized twigs from floor, Level 200	SI	1	KRT
81	Buena Vista	UGAMS- 3129	3420	25	?	Charcoal	-11.731	-76.9681	Benfer & Laura, 2019	Temple of El Paraíso del Valle, carbonized twigs from between one floor and ultimate floor	SI	1	KRT
82	Pampa de las Llamas	UGa-4510	4655	95	100	Charcoal	-9.5	-78.22	Pozorski & Pozorski 1992	Midden, west side of site	NO	4	KRT
83	Pampa de las Llamas	UGa-5796	3745	85		Charcoal	-9.5	-78.22	Pozorski & Pozorski 1992	Domestic architecture, east side of site	NO	2	KRT
84	Pampa de las Llamas	UGa-4505	3735	75	100	Charcoal	-9.5	-78.22	Pozorski & Pozorski 1992	Midden immediately east of Huaca A. Unit 3, surface layer (0-12 cm depth)	NO	4	KRT
85	Pampa de las Llamas	UGa-5461	3520	70	0	Wood	-9.5	-78.22	Pozorski & Pozorski 1992	Aligned enclosure immediately east of Huaca A	NO	3	KRT
86	Pampa de las Llamas	UGa-5462	3515	70	100	Wood	-9.5	-78.22	Pozorski & Pozorski 1992	Huaca A, 2nd construction phase. From part of a wooden gate located at the NE entrance to Huaca A.	NO	2	KRT
87	Pampa de las Llamas	UGa-5801	3495	85	0	Wood	-9.5	-78.22	Pozorski & Pozorski 1992	Aligned mound, west side of site	NO	3	KRT
88	Pampa de las Llamas	UGa-4506	3490	75	100	Charcoal	-9.5	-78.22	Pozorski & Pozorski 1992	Midden immediately east of Huaca A. Unit 3, level 3 (18-32 cm depth)	NO	2	KRT
89	Pampa de las Llamas	UGa-5799	3465	55	0	Wood	-9.5	-78.22	Pozorski & Pozorski 1992	Elite domestic architecture, west side of site	NO	3	KRT
90	Pampa de las Llamas	UGa-4508	3425	75	0	Charcoal	-9.5	-78.22	Pozorski & Pozorski 1992	Midden, east side of site	NO	3	KRT
91	Pampa de las Llamas	UGa-4507	3390	150	0	Charcoal	-9.5	-78.22	Pozorski & Pozorski 1992	Midden, east side of site	NO	3	KRT
92	Pampa de las Llamas	UGa-5800	3345	55	0	Wood	-9.5	-78.22	Pozorski & Pozorski 1992	Aligned mound, west side of site	NO	3	KRT
93	Pampa de las Llamas	UGa-4509	3320	85	0	Charcoal	-9.5	-78.22	Pozorski & Pozorski 1992	Midden, west side of site	NO	3	KRT
94	Pampa de las Llamas	UGa-5611	3310	70	0	Charcoal	-9.5	-78.22	Pozorski & Pozorski 1992	Hearth, west side of site	SI	3	KRT
95	Pampa de las Llamas	UGa-5610	3270	50	0	Wood	-9.5	-78.22	Pozorski & Pozorski 1992	Domestic architecture, west side of site	NO	3	KRT
96	Pampa de las Llamas	UGa-5795	3245	55	0	Wood	-9.5	-78.22	Pozorski & Pozorski 1992	Aligned mound, east side of site	NO	3	KRT
97	Pampa de las Llamas	UGa-5609	3230	60		Charcoal	-9.5	-78.22	Pozorski & Pozorski 1992	midden below domestic architecture, east side of site	NO	2	KRT
98	Pampa de las Llamas	UGa-5797	3220	60		Wood	-9.5	-78.22	Pozorski & Pozorski 1992	aligned mound, east side of site	NO	2	KRT
99	Pampa de las Llamas	UGa-5630	3190	60		Charcoal	-9.5	-78.22	Pozorski & Pozorski 1992	fill of plaza in domestic architecture, west side of site	NO	2	KRT
100	Pampa de las Llamas	UGa-5794	3185	60		Wood	-9.5	-78.22	Pozorski & Pozorski 1992	Huaca A, 2nd construction phase	NO	2	KRT
101	Pampa de las Llamas	UGa-4511	3175	90		Charcoal	-9.5	-78.22	Pozorski & Pozorski 1992	midden, west side of site	NO	2	KRT
102	Pampa de las Llamas	UGa-4503	3165	75	0	Charcoal	-9.5	-78.22	Pozorski & Pozorski 1992	Midden, east side of site	NO	3	KRT
103	Pampa de las Llamas	UGa-5798	3160	85		Wood	-9.5	-78.22	Pozorski & Pozorski 1992	aligned enclosure immediately west of Huaca A	NO	2	KRT
104	Pampa de las Llamas	UGa-5873	3105	30		Wood	-9.5	-78.22	Pozorski & Pozorski 1992	Huaca A, 2nd construction phase	NO	2	KRT
105	Pampa de las Llamas	UGa-4504	3070	85	0	Charcoal	-9.5	-78.22	Pozorski & Pozorski 1992	Midden. east side of site	NO	3	KRT
106	Huaynuná	UGa-4522	4200	80	100	Charcoal	-9.35	-78.4	Pozorski & Pozorski 1990	Stratigraphic excavation L, level 6a.	NO	2	KRT
107	Huaynuná	UGa-5616	4130	230	100	Wood	-9.35	-78.4	Pozorski & Pozorski 1990	Post within bedrock, depression, hillside structure	NO	2	KRT
108	Huaynuná	UGa-4520	4040	65	100	Charcoal	-9.35	-78.4	Pozorski & Pozorski 1990	Stratigraphic excavation L, level 2b.	NO	2	KRT
109	Huaynuná	UGa-5619	3830	50	100	Wood	-9.35	-78.4	Pozorski & Pozorski 1990	Post within domestic architecture A	NO	2	KRT
110	Huaynuná	UGa-5612	3810	60	100	Charcoal	-9.35	-78.4	Pozorski & Pozorski 1990	Within ventilated hearth, Structure M	SI	2	KRT
111	Huaynuná	UGa-4521	3725	75	100	Charcoal	-9.35	-78.4	Pozorski & Pozorski 1990	Stratigraphic excavation L. Level 3c	NO	2	KRT
112	Huaynuná	UGa-5631	3690	60	100	Wood	-9.35	-78.4	Pozorski & Pozorski 1990	Within domestic architecture F	NO	2	KRT
113	Huaynuná	UGa-5617	3600	50	100	cane	-9.35	-78.4	Pozorski & Pozorski 1990	Within circular hillside structure. Platform.	NO	2	KRT
114	Huaynuná	UGa-5613	3600	100	100	Wood	-9.35	-78.4	Pozorski & Pozorski 1990	Post on terrace 3 , hillside structure.	NO	2	KRT
115	Huaynuná	UGa-5615	3580	90	100	Wood	-9.35	-78.4	Pozorski & Pozorski 1990	Post within remodeled terrace 2 floor, hillside	NO	2	KRT
116	Huaynuná	UGa-5614	3570	50	100	Charcoal	-9.35	-78.4	Pozorski & Pozorski 1990	Midden b hillside structure.	NO	2	KRT
117	Huaynuná	UGa-5618	3510	90	100	Wood	-9.35	-78.4	Pozorski & Pozorski 1990	Post on terrace 3, hillside structure	NO	2	KRT
118	Huaynuná	UGa-5632	3450	65	100	Wood	-9.35	-78.4	Pozorski & Pozorski 1990	Midden overlying hillside structure	NO	2	KRT
119	Taukachi - Konkan	UGa-7037	3530	50	?	?			Pozorski & Pozorski 1998	Dentro de un hoyo de poste, lado sur del atrio	NO	4	KRT
120	Taukachi - Konkan	UGa-7041	3380	70	?	?			Pozorski & Pozorski 1998	Dentro de un hoyo de poste cuarto en el lado sur del atrio	NO	4	KRT
121	Taukachi - Konkan	UGa-7040	3270	40	?	?			Pozorski & Pozorski 1998	Dentro de un hoyo de poste, lado sur del patio oeste	NO	4	KRT
122	Taukachi - Konkan	UGa-7042	3120	60	?	?			Pozorski & Pozorski 1998	Hoyo de poste, lado oeste del atrio	NO	4	KRT
123	Taukachi - Konkan	UGa-7038	3120	45	?	?			Pozorski & Pozorski 1998	Dentro de un fogón. Estructura circular al norte del patio oeste	SI	4	KRT
124	Taukachi - Konkan	UGa-7039	3005	35	?	?			Pozorski & Pozorski 1998	Dentro de una columna, cuarto en el lado sur del atrio	NO	4	KRT
125	Taukachi - Konkan	Beta-535191	3250	30	?	Wood			Pozorski & Pozorski 2020	Room 6, west entrance, north pilaster, step 3	NO	1	KRT
126	Taukachi - Konkan	Beta-427589	3220	30	?	Wood			Pozorski & Pozorski 2020	Room 13, east entrance, north pilaster of landing	NO	1	KRT
127	Taukachi - Konkan	Beta-427588	3210	30	?	Wood			Pozorski & Pozorski 2020	Room 13, east entrance, south pilaster of landing	NO	1	KRT
128	Taukachi - Konkan	Beta-427587	3200	30	?	Wood			Pozorski & Pozorski 2020	Room 13, east entrance, north pilaster	NO	1	KRT
129	Taukachi - Konkan	Beta-535190	3170	30	?	Wood			Pozorski & Pozorski 2020	Room 6, north entrance, west pilaster	NO	1	KRT
130	Taukachi - Konkan	Beta-535192	3190	30	?	Wood			Pozorski & Pozorski 2020	East room, measuring sticks along west wall in southwest corner	NO	1	KRT
131	Taukachi - Konkan	Beta-477229	3140	30	?	Charcoal			Pozorski & Pozorski 2020	West room, central hearth floor	SI	1	KRT
132	Taukachi - Konkan	Beta-477227	3240	30	?	Charcoal			Pozorski & Pozorski 2020	Square A, level 3	NO	1	KRT
133	Taukachi - Konkan	Beta- 477228	3220	30	?	Charcoal			Pozorski & Pozorski 2020	Square E, level 3	NO	1	KRT
134	Acshipucoto	PRI-14-108-71	4230	29	?	Charcoal			Muro 2018		SI	1	MT
135	Acshipucoto	D-AMS 021271	4154	30	?	Charcoal			Muro 2019		SI	1	MT
136	Acshipucoto	D-AMS 014375	4144	28	?	Charcoal			Muro 2020		SI	1	MT
137	Acshipucoto	D-AMS 014376	4149	27	?	Charcoal			Muro 2021		SI	1	MT
138	Acshipucoto	D-AMS 021270	4129	30	?	Charcoal			Muro 2022		SI	1	MT
139	Acshipucoto	Beta - 423709	4100	30	?	Charcoal			Muro 2023		SI	1	MT
140	Acshipucoto	Beta - 423708	4050	30	?	Charcoal			Muro 2024		SI	1	MT
141	Acshipucoto	D-AMS 021269	3976	32	?	Charcoal			Muro 2025		SI	1	MT
142	Hualcayán	D-AMS 015768	3649	38	-12.2	Charcoal	-9.09	-77.45	Bria 2017	Perocolto Phase 1. Associated with activities in Mito-Kotosh spaces during the Initial Formative Period.	SI	1	KRT
143	Hualcayán	D-AMS 008213	3078	21			-9.09	-77.45	Bria 2017			1
144	Hualcayán	D-AMS 008215	3291	24			-9.09	-77.45	Bria 2017			1
145	Hualcayán	D-AMS 008216	3887	23	-16.7	Charcoal	-9.09	-77.45	Bria 2017	Perocolto Phase 1. Context linked to the construction and use of Mito-Kotosh structures.	SI	1	KRT
146	Chavin	AA69446	2644	45	?	Charcoal	-9.5937	-77.1777	Contreras 2010	Wood charcoal from the hearth deposit in the Mito-style structure.	SI	1	MT
147	Chavin	AA69447	2712	42	?	Charcoal	-9.5937	-77.1777	Contreras 2010	Wood charcoal from the hearth deposit in the Mito-style structure.	SI	1	MT
148	Chavin	AA69448	2506	43	?	Charcoal	-9.5937	-77.1777	Contreras 2010	Wood charcoal from the upper deposits associated with janabarroid ceramics.	SI	1	MT
149	Chavin	AA69449	2567	42	?	Charcoal	-9.5937	-77.1777	Contreras 2010	Wood charcoal from the upper deposits associated with janabarroid ceramics.	SI	1	MT
150	Piruro	LV-498	3050	90	?	Charcoal	-9.38	-76.51	Girault 1981	Strate 2, profondeur de l'echantillón (-60 cm)		2
151	Piruro	LV-495	3480	80	?	Charcoal	-9.38	-76.51	Girault 1981	?		4
152	Piruro	Gif-2302	3930	130	100	Charcoal	-9.38	-76.51	Girault 1981	Pit C.F.G.H., layer 3, deep 2 m, stone constructions and lithic artefacts		2	MT
153	Piruro	Gif-2304/5	4025	130	100	Charcoal	-9.38	-76.51	Girault 1981	Pit I.II.III.IV,layer 4, deep 2.7 m, stone constructions and lithic artefacts (-270 cm)		2	MT
154	Piruro	Gif-2304/7	4050	230	100	Charcoal	-9.38	-76.51	Girault 1981	Pit C.D.E.F., layer 4, deep 2.25 m, stone constructions and lithic artefacts (-225 cm)		2	MT
155	Piruro	Gif-2305	3880	130	100	Charcoal	-9.38	-76.51	Girault 1981	Pit G.H.I.J.K., layer 3, deep 1.6 m, stone constructions and lithic artefacts		2	MT
156	Piruro	LV-494	3480	85	?	Charcoal	-9.38	-76.51	Girault 1981	Strate 4, profondeur de l'echantillón (-200 cm)		3
157	Piruro	Gif-7099	2740	70	100	Charcoal	-9.38	-76.51	Bonnier 1988	Layer 8 cut CC		3	MT
158	Piruro	Gif-7100	3230	70	100	Charcoal	-9.38	-76.51	Bonnier 1988	Layer 9 cut DD		3	MT
159	Piruro	Gif-7101	3160	70	100	Charcoal	-9.38	-76.51	Bonnier 1988	Layer 9 cut DD		3	MT
160	Piruro	Gif-7102	3600	70	100	Charcoal	-9.38	-76.51	Bonnier 1988	Layer 20 cut AA		3	MT
161	Piruro	Gif-7103	3250	70	100	Charcoal	-9.38	-76.51	Bonnier 1988	Layer 21 cut BB		3	MT
162	Piruro	Gif-7104	3960	340	100	Charcoal	-9.38	-76.51	Bonnier 1988	Layer 22 cut BB		3	MT
163	Piruro	Gif-7266	3770	60	100	Charcoal	-9.38	-76.51	Bonnier et Rozember 1988	Hearth of Temple P1		2
164	Bahia Seca	UGa-6129	3355	60	?	Charcoal			Pozorski & Pozorski 1996	Initial Period. Domestic architecture, west side of site	NO	3	KRT
165	Bahia Seca	UGa-6023	3280	55	?	Totora			Pozorski & Pozorski 1996	Initial Period. Within circular ventilated hearth structure	SI	3	KRT
166	Bahia Seca	UGa-6025	3240	60	?	Wood			Pozorski & Pozorski 1996	Initial Period. Main mound, east side of site	NO	3	KRT
167	Bahia Seca	UGa-6022	3155	55	?	Cane			Pozorski & Pozorski 1996	Initial Period. Main mound, east side of site	NO	3	KRT
168	Shillacoto	TK-43	3200	80	100	Charcoal			Izumi 1966	Initial Period. From stratum containing many potsherds of Kotosh Wairajirca period	SI	3	MT

## Sheet: Model B
	Site	Lab	14C BP	Standard Deviation	Delta 13 Correction	Material	Latitude	Longitude	Reference	Context	KRT	CH	MT o KRT
1	Huaricanga	AA84560	4023	42	-22.8	Plant fiber	-10.5	-77.76	Piscitelli, 2014	Phase 01. Unit 9 H2-I2 C-Fl. 4. (Floor 18)	SI	1	KRT
2	Huaricanga	AA102184	4702	70	-20.2	Plant fiber	-10.5	-77.76	Piscitelli, 2014	Phase 01. Unit III A2 E-Fl. 1a. (Floor 31b)	SI	1	KRT
3	Huaricanga	AA102179	4403	72	-18.4	Plant fiber	-10.5	-77.76	Piscitelli, 2014	Phase 02. Unit III A3 D-Fl. 1 (Floor 23)	SI	1	KRT
4	Huaricanga	AA102180	3950	34	-12.01	Plant fiber	-10.5	-77.76	Piscitelli, 2014	Phase 02. Unit III n/a D-Fl. 3a (Floor 22a)	SI	1	KRT
5	Huaricanga	AA102181	3950	42	-26.2	Plant fiber	-10.5	-77.76	Piscitelli, 2014	Phase 02. Unit III n/a D-Fl. 2b (Floor 24b)	SI	1	KRT
6	Huaricanga	AA102182	3937	34	-12.2	Plant fiber	-10.5	-77.76	Piscitelli, 2014	Phase 02. Unit III n/a D-Fl. 3a (Floor 22a)	SI	1	KRT
7	Huaricanga	AA102185	4437	80	-20.2	Plant fiber	-10.5	-77.76	Piscitelli, 2014	Phase 02. Unit III A2 D-Fl. 1 (Floor 23)	SI	1	KRT
8	Huaricanga	AA84551	3926	43	-12.5	Plant fiber	-10.5	-77.76	Piscitelli, 2014	Phase 04. Unit 7 F7-F8 A-Fl. 1a (Floor 6a)	SI	1	KRT
9	Huaricanga	AA84552	3899	43	-12.5	Plant fiber	-10.5	-77.76	Piscitelli, 2014	Phase 04. Unit 7 n/a A-Fl. 1b (Floor 6b)	SI	1	KRT
10	La Galgada	TX3167	3820	60	100	Wood charbonized	-8.45	-78.15	Grieder & Bueno 1981	Fire pit in Floor 25, Sec D1, Sq D6	SI	2	MT
11	La Galgada	TK4449	3790	70	100	Charcoal	-8.45	-78.15	Grieder & Bueno 1981	Sec E12/I2, debris on Floor 20, interior of Preceramic period chamber in one of first buildings S of North Mound	SI	2	MT
12	La Galgada	TK4448	3650	60	100	Charcoal	-8.45	-78.15	Grieder & Bueno 1981	Sec H11/EG9, Floor 20, from firepit fill	SI	2	MT
13	La Galgada	UGa4583	3590	75	?	Charcoal	-8.45	-78.15	Grieder & Bueno 1981	Sec H11/EF10, Floor 30, from firepit fill in center of principal ritual chamber of North Temple	SI	3	MT
14	La Galgada	TX-2463	3470	90	100	Charcoal	-8.45	-78.15	Grieder & Bueno 1981	From middden, base of massive wall, N gallery, Mound B	NO	2	MT
15	La Galgada	TX-2464	3440	80	100	Wood maguey	-8.45	-78.15	Grieder & Bueno 1981	From shaft wall leading to tomb built into temple after all floors had been constructed, S Gallery, Mound B, Phase 5	NO	2	MT
16	La Galgada	TX-3166	3660	80	100	Wood carbonized	-8.45	-78.15	Grieder & Bueno 1981	Fire pit in Floors 3, 5, 7, Sec C1, Sq J6	SI	2	MT
17	La Galgada	TX-3663	3540	50	100	Charcoal	-8.45	-78.15	Grieder & Bueno 1981	Sec G11/G8, pit in Floor 9, S wing of North Mound, 2 m below top of mound	NO	2	MT
18	La Galgada	TX-3664	4110	50	100	Charcoal	-8.45	-78.15	Grieder & Bueno 1981	1-11:D-5, related to floor 40	SI	4	MT
19	La Galgada	TX-4446	3130	80	100	Charcoal	-8.45	-78.15	Grieder & Bueno 1981	Sec G12/H4, Floor 8, fire pit	SI	2	MT
20	La Galgada	TX-4447	3670	70	100	Charcoal	-8.45	-78.15	Grieder & Bueno 1981	Sec H11/EF10, Floor 30, from firepit fill in center of principal ritual chamber of North Temple	SI	2	MT
21	Huaricoto	Tx-3583	2330	80	100	?	-9.3	-77.6	Burger & Salazar-Burger 1985	From sectors IVC and IVE, associated with late Capilla ceramics. Phase Late Capilla	SI	3	MT
22	Caral	Beta-132593	3640	50	?	Plant fiber	-10.89	-79.52	Shady et al 2001	Construction fill of atrium on top of Piramide Mayor, Caral	SI	2	MT
23	Caral	ISGS-4724	3730	70	?	Plant fiber	-10.89	-79.52	Shady et al 2001	Construction fill of atrium on top of Piramide Mayor, Caral	SI	2	MT
24	Caral	Beta-134427	3740	90	?	Plant fiber	-10.89	-79.52	Shady et al 2001	Offering inside room on top of Piramide Mayor, Caral	SI	2	MT
25	Caral	ISGS-4738	3740	80	?	Plant fiber	-10.89	-79.52	Shady et al 2001	Floor construction center of stratified trash, rear of Sector N, Caral	NO	2	MT
26	Caral	ISGS-4740	3810	70	?	Plant fiber	-10.89	-79.52	Shady et al 2001	Upper level stratified trash, rear of Sector N, Caral	NO	2	MT
27	Caral	Beta-132589	3820	60	?	Plant fiber	-10.89	-79.52	Shady et al 2001	Upper level stratified trash, Sector A, Caral	NO	2	MT
28	Caral	ISGS-4710	3840	70	?	Plant fiber	-10.89	-79.52	Shady et al 2001	Wall construction around sunken circular plaza in front of Piramide Mayor, Caral	NO	2	MT
29	Caral	GS-4726	3900	70	?	Plant fiber	-10.89	-79.52	Shady et al 2001	Platform construction in front of Sector C, Caral	NO	2	MT
30	Caral	ISGS-4733	3960	80	?	Plant fiber	-10.89	-79.52	Shady et al 2001	Lower level stratified trash, Sector A, Caral	NO	2	MT
31	Caral	ISGS-4734	3970	90	?	Plant fiber	-10.89	-79.52	Shady et al 2001	Lower floor on top of wall around sunken circular platform, Sector L, Caral	NO	2	MT
32	Caral	Beta-134429	3970	40	?	Plant fiber	-10.89	-79.52	Shady et al 2001	Lowest level (7) stratified trash, in rear of Sector N, Caral	NO	2	MT
33	Caral	ISGS-4729	3990	70	?	Plant fiber	-10.89	-79.52	Shady et al 2001	Floor contact residential architecture, Sector A, Caral	NO	2	MT
34	Caral	ISGS-4732	3990	70	?	Plant fiber	-10.89	-79.52	Shady et al 2001	Upper level stratified trash, Sector A, Caral	NO	2	MT
35	Caral	Beta-134428	4020	40	?	Plant fiber	-10.89	-79.52	Shady et al 2001	Upper level (3) stratified trash, rear of Sector N, Caral	NO	2	MT
36	Caral	ISGS-4736	4060	70	?	Plant fiber	-10.89	-79.52	Shady et al 2001	Lowest level stratified trash, rear of Sector N, Caral	NO	2	MT
37	Caral	ISGS-4711	4090	90	?	Plant fiber	-10.89	-79.52	Shady et al 2001	Stratum under sunken circular plaza in front of Piramide Mayor, Caral	NO	2	MT
38	Caral	Beta-184980	3630	70	?	?	-10.89	-79.52	Shady 2006	Platform fill, Pyramid of the Gallery, Sector H, Caral	NO	3	MT
39	Caral	Beta-184984	3700	60	?	?	-10.89	-79.52	Shady 2006	Platform fill, Sector E, Caral	NO	3	MT
40	Caral	Beta-184979	3800	70	?	?	-10.89	-79.52	Shady 2006	Platform fill, Pyramid of the Circular Altar, Sector P, Caral	NO	3	MT
41	Caral	Beta-184981	3830	70	?	?	-10.89	-79.52	Shady 2006	Domestic unit of Sector NN2, Caral	NO	3	MT
42	Caral	Beta-184977	3990	70	?	?	-10.89	-79.52	Shady 2006	Wall of the Quary Pyramid, Sector B, Caral	NO	3	MT
43	Caral	Beta-184983	4040	80	?	?	-10.89	-79.52	Shady 2006	Room of the Central Plaza, Sector Z, Caral	NO	3	MT
44	Caral	Beta-184985	4060	70	?	?	-10.89	-79.52	Shady 2006	Domestic unit of Sector I, Caral	NO	3	MT
45	Caral	Beta-184973	4160	70	?	?	-10.89	-79.52	Shady 2006	Domestic unit of Sector I, Caral	NO	3	MT
46	Kotosh	TK-110	3470	80	100	Charcoal	-9.93	-76.28	Izumi & Terada 1972	KT mound, Mito phase	SI	3	MT
47	Gramalote	Beta-321940	3080	40	100	Charcoal	-7.89	-72.79	Prieto 2018	Kotosh like structure. The date is based on a sample from a circular hearth filled with vegetal charcoal	SI	1	KRT
48	Gramalote	Beta-321943	3140	40	-26	Charcoal	-7.89	-72.79	Prieto 2018	Public Architectural Compound (PAC). Contemporary with the Kotosh like structure.	NO	1	KRT
49	Gramalote	Beta-321945	2850	80	100	Charcoal	-7.89	-72.79	Prieto 2018	Public Architectural Compound (PAC). Contemporary with the Kotosh like structure.	NO	1	KRT
50	El Paraiso	Beta-8704	3020	60	100	Charcoal	-11.953	-77.1183	Quilter, 1985	From midden, Unit I, Pit 2, Level G (30-40 cm)	SI	2	KRT
51	El Paraiso	P-1209	3065	61	100	Plant fragments	-11.953	-77.1183	Engel, 1966	Unit I, early phase. From mortar which cemented stones of N main wall of Unit I	SI	3	KRT
52	El Paraiso	P-1210	3366	59	100	Shicra	-11.953	-77.1183	Engel, 1967	Unit I, late phase. From rubble fill of room of Unit I	SI	3	KRT
53	El Paraiso	JQ02	3420	20	?	Charred seed	-11.953	-77.1183	Caramanica et al, 2019	Unit I, Pit 2, Level J	SI	1	KRT
54	El Paraiso	P-1214	3444	59	100	Charcoal	-11.953	-77.1183	Engel, 1967	From refuse and ash deposit on mud floor around building, Unit I, early phase of middle occupation period,	SI	3	KRT
55	El Paraiso	JQ10	3455	20	?	Charred seed	-11.953	-77.1183	Caramanica et al, 2019	Unit I, Pit 2, Level G	SI	1	KRT
56	Buena Vista	GX-32177	3790	80	?	Charcoal	-11.731	-76.9681	Benfer & Laura, 2019	Offering Chamber, Temple of the Fox, Level 400, carbonised twigs below level of rocks	SI	1	KRT
57	Buena Vista	GX-31276	3770	80	?	Charcoal	-11.731	-76.9681	Benfer & Laura, 2019	Offering Chamber, Temple of the Fox, Level 300, carbonized twigs below level of rocks	SI	1	KRT
58	Buena Vista	UGAMS- 2685	3600	30	?	Plant fragments	-11.731	-76.9681	Benfer & Laura, 2019	Solstice light chamber, plant fibers from mud plaster from fallen fragments of ceiling		1
59	Buena Vista	GX-31920	3660	90	?	Plant fragments	-11.731	-76.9681	Benfer & Laura, 2019	Temple of the Menacing Disk, plant fibers from mud plaster in the base of the sculpture		1
60	Buena Vista	UGAMS- 3128	3520	25	?	Charcoal	-11.731	-76.9681	Benfer & Laura, 2019	Temple of El Paraíso del Valle, carbonized twigs from a central hearth in Level 400	SI	1	KRT
61	Buena Vista	UGAMS- 3127	3450	25	?	Charcoal	-11.731	-76.9681	Benfer & Laura, 2019	Temple of El Paraíso del Valle, carbonized twigs from a central hearth in Level 300	SI	1	KRT
62	Buena Vista	UGAMS- 3126	3420	25	?	Charcoal	-11.731	-76.9681	Benfer & Laura, 2019	Temple of El Paraíso del Valle, carbonized twigs from floor, Level 200	SI	1	KRT
63	Buena Vista	UGAMS- 3129	3420	25	?	Charcoal	-11.731	-76.9681	Benfer & Laura, 2019	Temple of El Paraíso del Valle, carbonized twigs from between one floor and ultimate floor	SI	1	KRT
64	Pampa de las Llamas	UGa-5796	3745	85		Charcoal	-9.5	-78.22	Pozorski & Pozorski 1992	Domestic architecture, east side of site	NO	2	KRT
65	Pampa de las Llamas	UGa-4505	3735	75	100	Charcoal	-9.5	-78.22	Pozorski & Pozorski 1992	Midden immediately east of Huaca A. Unit 3, surface layer (0-12 cm depth)	NO	4	KRT
66	Pampa de las Llamas	UGa-5461	3520	70	0	Wood	-9.5	-78.22	Pozorski & Pozorski 1992	Aligned enclosure immediately east of Huaca A	NO	3	KRT
67	Pampa de las Llamas	UGa-5462	3515	70	100	Wood	-9.5	-78.22	Pozorski & Pozorski 1992	Huaca A, 2nd construction phase. From part of a wooden gate located at the NE entrance to Huaca A.	NO	2	KRT
68	Pampa de las Llamas	UGa-5801	3495	85	0	Wood	-9.5	-78.22	Pozorski & Pozorski 1992	Aligned mound, west side of site	NO	3	KRT
69	Pampa de las Llamas	UGa-4506	3490	75	100	Charcoal	-9.5	-78.22	Pozorski & Pozorski 1992	Midden immediately east of Huaca A. Unit 3, level 3 (18-32 cm depth)	NO	2	KRT
70	Pampa de las Llamas	UGa-5799	3465	55	0	Wood	-9.5	-78.22	Pozorski & Pozorski 1992	Elite domestic architecture, west side of site	NO	3	KRT
71	Pampa de las Llamas	UGa-4508	3425	75	0	Charcoal	-9.5	-78.22	Pozorski & Pozorski 1992	Midden, east side of site	NO	3	KRT
72	Pampa de las Llamas	UGa-5800	3345	55	0	Wood	-9.5	-78.22	Pozorski & Pozorski 1992	Aligned mound, west side of site	NO	3	KRT
73	Pampa de las Llamas	UGa-4509	3320	85	0	Charcoal	-9.5	-78.22	Pozorski & Pozorski 1992	Midden, west side of site	NO	3	KRT
74	Pampa de las Llamas	UGa-5611	3310	70	0	Charcoal	-9.5	-78.22	Pozorski & Pozorski 1992	Hearth, west side of site	SI	3	KRT
75	Pampa de las Llamas	UGa-5610	3270	50	0	Wood	-9.5	-78.22	Pozorski & Pozorski 1992	Domestic architecture, west side of site	NO	3	KRT
76	Pampa de las Llamas	UGa-5795	3245	55	0	Wood	-9.5	-78.22	Pozorski & Pozorski 1992	Aligned mound, east side of site	NO	3	KRT
77	Pampa de las Llamas	UGa-5609	3230	60		Charcoal	-9.5	-78.22	Pozorski & Pozorski 1992	midden below domestic architecture, east side of site	NO	2	KRT
78	Pampa de las Llamas	UGa-5797	3220	60		Wood	-9.5	-78.22	Pozorski & Pozorski 1992	aligned mound, east side of site	NO	2	KRT
79	Pampa de las Llamas	UGa-5630	3190	60		Charcoal	-9.5	-78.22	Pozorski & Pozorski 1992	fill of plaza in domestic architecture, west side of site	NO	2	KRT
80	Pampa de las Llamas	UGa-5794	3185	60		Wood	-9.5	-78.22	Pozorski & Pozorski 1992	Huaca A, 2nd construction phase	NO	2	KRT
81	Pampa de las Llamas	UGa-4511	3175	90		Charcoal	-9.5	-78.22	Pozorski & Pozorski 1992	midden, west side of site	NO	2	KRT
82	Pampa de las Llamas	UGa-4503	3165	75	0	Charcoal	-9.5	-78.22	Pozorski & Pozorski 1992	Midden, east side of site	NO	3	KRT
83	Pampa de las Llamas	UGa-5798	3160	85		Wood	-9.5	-78.22	Pozorski & Pozorski 1992	aligned enclosure immediately west of Huaca A	NO	2	KRT
84	Pampa de las Llamas	UGa-5873	3105	30		Wood	-9.5	-78.22	Pozorski & Pozorski 1992	Huaca A, 2nd construction phase	NO	2	KRT
85	Pampa de las Llamas	UGa-4504	3070	85	0	Charcoal	-9.5	-78.22	Pozorski & Pozorski 1992	Midden. east side of site	NO	3	KRT
86	Huaynuná	UGa-4522	4200	80	100	Charcoal	-9.35	-78.4	Pozorski & Pozorski 1990	Stratigraphic excavation L, level 6a.	NO	2	KRT
87	Huaynuná	UGa-4520	4040	65	100	Charcoal	-9.35	-78.4	Pozorski & Pozorski 1990	Stratigraphic excavation L, level 2b.	NO	2	KRT
88	Huaynuná	UGa-5619	3830	50	100	Wood	-9.35	-78.4	Pozorski & Pozorski 1990	Post within domestic architecture A	NO	2	KRT
89	Huaynuná	UGa-5612	3810	60	100	Charcoal	-9.35	-78.4	Pozorski & Pozorski 1990	Within ventilated hearth, Structure M	SI	2	KRT
90	Huaynuná	UGa-4521	3725	75	100	Charcoal	-9.35	-78.4	Pozorski & Pozorski 1990	Stratigraphic excavation L. Level 3c	NO	2	KRT
91	Huaynuná	UGa-5631	3690	60	100	Wood	-9.35	-78.4	Pozorski & Pozorski 1990	Within domestic architecture F	NO	2	KRT
92	Huaynuná	UGa-5617	3600	50	100	cane	-9.35	-78.4	Pozorski & Pozorski 1990	Within circular hillside structure. Platform.	NO	2	KRT
93	Huaynuná	UGa-5615	3580	90	100	Wood	-9.35	-78.4	Pozorski & Pozorski 1990	Post within remodeled terrace 2 floor, hillside	NO	2	KRT
94	Huaynuná	UGa-5614	3570	50	100	Charcoal	-9.35	-78.4	Pozorski & Pozorski 1990	Midden b hillside structure.	NO	2	KRT
95	Huaynuná	UGa-5618	3510	90	100	Wood	-9.35	-78.4	Pozorski & Pozorski 1990	Post on terrace 3, hillside structure	NO	2	KRT
96	Huaynuná	UGa-5632	3450	65	100	Wood	-9.35	-78.4	Pozorski & Pozorski 1990	Midden overlying hillside structure	NO	2	KRT
97	Taukachi - Konkan	UGa-7037	3530	50	?	?			Pozorski & Pozorski 1998	Dentro de un hoyo de poste, lado sur del atrio	NO	4	KRT
98	Taukachi - Konkan	UGa-7041	3380	70	?	?			Pozorski & Pozorski 1998	Dentro de un hoyo de poste cuarto en el lado sur del atrio	NO	4	KRT
99	Taukachi - Konkan	UGa-7040	3270	40	?	?			Pozorski & Pozorski 1998	Dentro de un hoyo de poste, lado sur del patio oeste	NO	4	KRT
100	Taukachi - Konkan	UGa-7042	3120	60	?	?			Pozorski & Pozorski 1998	Hoyo de poste, lado oeste del atrio	NO	4	KRT
101	Taukachi - Konkan	UGa-7038	3120	45	?	?			Pozorski & Pozorski 1998	Dentro de un fogón. Estructura circular al norte del patio oeste	SI	4	KRT
102	Taukachi - Konkan	UGa-7039	3005	35	?	?			Pozorski & Pozorski 1998	Dentro de una columna, cuarto en el lado sur del atrio	NO	4	KRT
103	Taukachi - Konkan	Beta-535191	3250	30	?	Wood			Pozorski & Pozorski 2020	Room 6, west entrance, north pilaster, step 3	NO	1	KRT
104	Taukachi - Konkan	Beta-427589	3220	30	?	Wood			Pozorski & Pozorski 2020	Room 13, east entrance, north pilaster of landing	NO	1	KRT
105	Taukachi - Konkan	Beta-427588	3210	30	?	Wood			Pozorski & Pozorski 2020	Room 13, east entrance, south pilaster of landing	NO	1	KRT
106	Taukachi - Konkan	Beta-427587	3200	30	?	Wood			Pozorski & Pozorski 2020	Room 13, east entrance, north pilaster	NO	1	KRT
107	Taukachi - Konkan	Beta-535190	3170	30	?	Wood			Pozorski & Pozorski 2020	Room 6, north entrance, west pilaster	NO	1	KRT
108	Taukachi - Konkan	Beta-535192	3190	30	?	Wood			Pozorski & Pozorski 2020	East room, measuring sticks along west wall in southwest corner	NO	1	KRT
109	Taukachi - Konkan	Beta-477229	3140	30	?	Charcoal			Pozorski & Pozorski 2020	West room, central hearth floor	SI	1	KRT
110	Taukachi - Konkan	Beta-477227	3240	30	?	Charcoal			Pozorski & Pozorski 2020	Square A, level 3	NO	1	KRT
111	Taukachi - Konkan	Beta- 477228	3220	30	?	Charcoal			Pozorski & Pozorski 2020	Square E, level 3	NO	1	KRT
112	Acshipucoto	PRI-14-108-71	4230	29	?	Charcoal			Muro 2018		SI	1	MT
113	Acshipucoto	D-AMS 021271	4154	30	?	Charcoal			Muro 2019		SI	1	MT
114	Acshipucoto	D-AMS 014375	4144	28	?	Charcoal			Muro 2020		SI	1	MT
115	Acshipucoto	D-AMS 014376	4149	27	?	Charcoal			Muro 2021		SI	1	MT
116	Acshipucoto	D-AMS 021270	4129	30	?	Charcoal			Muro 2022		SI	1	MT
117	Acshipucoto	Beta - 423709	4100	30	?	Charcoal			Muro 2023		SI	1	MT
118	Acshipucoto	Beta - 423708	4050	30	?	Charcoal			Muro 2024		SI	1	MT
119	Acshipucoto	D-AMS 021269	3976	32	?	Charcoal			Muro 2025		SI	1	MT
120	Hualcayán	D-AMS 015768	3649	38	-12.2	Charcoal	-9.09	-77.45	Bria 2017	Perocolto Phase 1. Associated with activities in Mito-Kotosh spaces during the Initial Formative Period.	SI	1	KRT
121	Hualcayán	D-AMS 008213	3078	21			-9.09	-77.45	Bria 2017			1
122	Hualcayán	D-AMS 008215	3291	24			-9.09	-77.45	Bria 2017			1
123	Hualcayán	D-AMS 008216	3887	23	-16.7	Charcoal	-9.09	-77.45	Bria 2017	Perocolto Phase 1. Context linked to the construction and use of Mito-Kotosh structures.	SI	1	KRT
124	Chavin	AA69446	2644	45	?	Charcoal	-9.5937	-77.1777	Contreras 2010	Wood charcoal from the hearth deposit in the Mito-style structure.	SI	1	MT
125	Chavin	AA69447	2712	42	?	Charcoal	-9.5937	-77.1777	Contreras 2010	Wood charcoal from the hearth deposit in the Mito-style structure.	SI	1	MT
126	Chavin	AA69448	2506	43	?	Charcoal	-9.5937	-77.1777	Contreras 2010	Wood charcoal from the upper deposits associated with janabarroid ceramics.	SI	1	MT
127	Chavin	AA69449	2567	42	?	Charcoal	-9.5937	-77.1777	Contreras 2010	Wood charcoal from the upper deposits associated with janabarroid ceramics.	SI	1	MT
128	Piruro	LV-498	3050	90	?	Charcoal	-9.38	-76.51	Girault 1981	Strate 2, profondeur de l'echantillón (-60 cm)		2
129	Piruro	LV-495	3480	80	?	Charcoal	-9.38	-76.51	Girault 1981	?		4
130	Piruro	LV-494	3480	85	?	Charcoal	-9.38	-76.51	Girault 1981	Strate 4, profondeur de l'echantillón (-200 cm)		3
131	Piruro	Gif-7099	2740	70	100	Charcoal	-9.38	-76.51	Bonnier 1988	Layer 8 cut CC		3	MT
132	Piruro	Gif-7100	3230	70	100	Charcoal	-9.38	-76.51	Bonnier 1988	Layer 9 cut DD		3	MT
133	Piruro	Gif-7101	3160	70	100	Charcoal	-9.38	-76.51	Bonnier 1988	Layer 9 cut DD		3	MT
134	Piruro	Gif-7102	3600	70	100	Charcoal	-9.38	-76.51	Bonnier 1988	Layer 20 cut AA		3	MT
135	Piruro	Gif-7103	3250	70	100	Charcoal	-9.38	-76.51	Bonnier 1988	Layer 21 cut BB		3	MT
136	Piruro	Gif-7266	3770	60	100	Charcoal	-9.38	-76.51	Bonnier et Rozember 1988	Hearth of Temple P1		2
137	Bahia Seca	UGa-6129	3355	60	?	Charcoal			Pozorski & Pozorski 1996	Initial Period. Domestic architecture, west side of site	NO	3	KRT
138	Bahia Seca	UGa-6023	3280	55	?	Totora			Pozorski & Pozorski 1996	Initial Period. Within circular ventilated hearth structure	SI	3	KRT
139	Bahia Seca	UGa-6025	3240	60	?	Wood			Pozorski & Pozorski 1996	Initial Period. Main mound, east side of site	NO	3	KRT
140	Bahia Seca	UGa-6022	3155	55	?	Cane			Pozorski & Pozorski 1996	Initial Period. Main mound, east side of site	NO	3	KRT
141	Shillacoto	TK-43	3200	80	100	Charcoal			Izumi 1966	Initial Period. From stratum containing many potsherds of Kotosh Wairajirca period	SI	3	MT

## Sheet: Model C
	Site	Lab	14C BP	Standard Deviation	Delta 13 Correction	Material	Latitude	Longitude	Reference	Context	KRT	CH	MT o KRT
1	Huaricanga	AA84560	4023	42	-22.8	Plant fiber	-10.5	-77.76	Piscitelli, 2014	Phase 01. Unit 9 H2-I2 C-Fl. 4. (Floor 18)	SI	1	KRT
2	Huaricanga	AA102184	4702	70	-20.2	Plant fiber	-10.5	-77.76	Piscitelli, 2014	Phase 01. Unit III A2 E-Fl. 1a. (Floor 31b)	SI	1	KRT
3	Huaricanga	AA102179	4403	72	-18.4	Plant fiber	-10.5	-77.76	Piscitelli, 2014	Phase 02. Unit III A3 D-Fl. 1 (Floor 23)	SI	1	KRT
4	Huaricanga	AA102180	3950	34	-12.01	Plant fiber	-10.5	-77.76	Piscitelli, 2014	Phase 02. Unit III n/a D-Fl. 3a (Floor 22a)	SI	1	KRT
5	Huaricanga	AA102181	3950	42	-26.2	Plant fiber	-10.5	-77.76	Piscitelli, 2014	Phase 02. Unit III n/a D-Fl. 2b (Floor 24b)	SI	1	KRT
6	Huaricanga	AA102182	3937	34	-12.2	Plant fiber	-10.5	-77.76	Piscitelli, 2014	Phase 02. Unit III n/a D-Fl. 3a (Floor 22a)	SI	1	KRT
7	Huaricanga	AA102185	4437	80	-20.2	Plant fiber	-10.5	-77.76	Piscitelli, 2014	Phase 02. Unit III A2 D-Fl. 1 (Floor 23)	SI	1	KRT
8	Huaricanga	AA84551	3926	43	-12.5	Plant fiber	-10.5	-77.76	Piscitelli, 2014	Phase 04. Unit 7 F7-F8 A-Fl. 1a (Floor 6a)	SI	1	KRT
9	Huaricanga	AA84552	3899	43	-12.5	Plant fiber	-10.5	-77.76	Piscitelli, 2014	Phase 04. Unit 7 n/a A-Fl. 1b (Floor 6b)	SI	1	KRT
10	La Galgada	TX3167	3820	60	100	Wood charbonized	-8.45	-78.15	Grieder & Bueno 1981	Fire pit in Floor 25, Sec D1, Sq D6	SI	2	MT
11	La Galgada	TK4449	3790	70	100	Charcoal	-8.45	-78.15	Grieder & Bueno 1981	Sec E12/I2, debris on Floor 20, interior of Preceramic period chamber in one of first buildings S of North Mound	SI	2	MT
12	La Galgada	TK4448	3650	60	100	Charcoal	-8.45	-78.15	Grieder & Bueno 1981	Sec H11/EG9, Floor 20, from firepit fill	SI	2	MT
13	La Galgada	TX-2463	3470	90	100	Charcoal	-8.45	-78.15	Grieder & Bueno 1981	From middden, base of massive wall, N gallery, Mound B	NO	2	MT
14	La Galgada	TX-2464	3440	80	100	Wood maguey	-8.45	-78.15	Grieder & Bueno 1981	From shaft wall leading to tomb built into temple after all floors had been constructed, S Gallery, Mound B, Phase 5	NO	2	MT
15	La Galgada	TX-3166	3660	80	100	Wood carbonized	-8.45	-78.15	Grieder & Bueno 1981	Fire pit in Floors 3, 5, 7, Sec C1, Sq J6	SI	2	MT
16	La Galgada	TX-3663	3540	50	100	Charcoal	-8.45	-78.15	Grieder & Bueno 1981	Sec G11/G8, pit in Floor 9, S wing of North Mound, 2 m below top of mound	NO	2	MT
17	La Galgada	TX-4446	3130	80	100	Charcoal	-8.45	-78.15	Grieder & Bueno 1981	Sec G12/H4, Floor 8, fire pit	SI	2	MT
18	La Galgada	TX-4447	3670	70	100	Charcoal	-8.45	-78.15	Grieder & Bueno 1981	Sec H11/EF10, Floor 30, from firepit fill in center of principal ritual chamber of North Temple	SI	2	MT
19	Caral	Beta-132593	3640	50	?	Plant fiber	-10.89	-79.52	Shady et al 2001	Construction fill of atrium on top of Piramide Mayor, Caral	SI	2	MT
20	Caral	ISGS-4724	3730	70	?	Plant fiber	-10.89	-79.52	Shady et al 2001	Construction fill of atrium on top of Piramide Mayor, Caral	SI	2	MT
21	Caral	Beta-134427	3740	90	?	Plant fiber	-10.89	-79.52	Shady et al 2001	Offering inside room on top of Piramide Mayor, Caral	SI	2	MT
22	Caral	ISGS-4738	3740	80	?	Plant fiber	-10.89	-79.52	Shady et al 2001	Floor construction center of stratified trash, rear of Sector N, Caral	NO	2	MT
23	Caral	ISGS-4740	3810	70	?	Plant fiber	-10.89	-79.52	Shady et al 2001	Upper level stratified trash, rear of Sector N, Caral	NO	2	MT
24	Caral	Beta-132589	3820	60	?	Plant fiber	-10.89	-79.52	Shady et al 2001	Upper level stratified trash, Sector A, Caral	NO	2	MT
25	Caral	ISGS-4710	3840	70	?	Plant fiber	-10.89	-79.52	Shady et al 2001	Wall construction around sunken circular plaza in front of Piramide Mayor, Caral	NO	2	MT
26	Caral	GS-4726	3900	70	?	Plant fiber	-10.89	-79.52	Shady et al 2001	Platform construction in front of Sector C, Caral	NO	2	MT
27	Caral	ISGS-4727	3960	110	?	Plant fiber	-10.89	-79.52	Shady et al 2001	Stratum under the platform in front of Sector C, Caral	NO	2	MT
28	Caral	ISGS-4733	3960	80	?	Plant fiber	-10.89	-79.52	Shady et al 2001	Lower level stratified trash, Sector A, Caral	NO	2	MT
29	Caral	ISGS-4734	3970	90	?	Plant fiber	-10.89	-79.52	Shady et al 2001	Lower floor on top of wall around sunken circular platform, Sector L, Caral	NO	2	MT
30	Caral	Beta-134429	3970	40	?	Plant fiber	-10.89	-79.52	Shady et al 2001	Lowest level (7) stratified trash, in rear of Sector N, Caral	NO	2	MT
31	Caral	ISGS-4729	3990	70	?	Plant fiber	-10.89	-79.52	Shady et al 2001	Floor contact residential architecture, Sector A, Caral	NO	2	MT
32	Caral	ISGS-4732	3990	70	?	Plant fiber	-10.89	-79.52	Shady et al 2001	Upper level stratified trash, Sector A, Caral	NO	2	MT
33	Caral	Beta-134428	4020	40	?	Plant fiber	-10.89	-79.52	Shady et al 2001	Upper level (3) stratified trash, rear of Sector N, Caral	NO	2	MT
34	Caral	ISGS-4736	4060	70	?	Plant fiber	-10.89	-79.52	Shady et al 2001	Lowest level stratified trash, rear of Sector N, Caral	NO	2	MT
35	Caral	ISGS-4711	4090	90	?	Plant fiber	-10.89	-79.52	Shady et al 2001	Stratum under sunken circular plaza in front of Piramide Mayor, Caral	NO	2	MT
36	Kotosh	TK-42	3900	900	100	Charcoal	-9.93	-76.28	Izumi & Terada 1972	Temple ER-26	SI	2	MT
37	Gramalote	Beta-321940	3080	40	100	Charcoal	-7.89	-72.79	Prieto 2018	Kotosh like structure. The date is based on a sample from a circular hearth filled with vegetal charcoal	SI	1	KRT
38	Gramalote	Beta-321943	3140	40	-26	Charcoal	-7.89	-72.79	Prieto 2018	Public Architectural Compound (PAC). Contemporary with the Kotosh like structure.	NO	1	KRT
39	Gramalote	Beta-321945	2850	80	100	Charcoal	-7.89	-72.79	Prieto 2018	Public Architectural Compound (PAC). Contemporary with the Kotosh like structure.	NO	1	KRT
40	El Paraiso	Beta-8704	3020	60	100	Charcoal	-11.953	-77.1183	Quilter, 1985	From midden, Unit I, Pit 2, Level G (30-40 cm)	SI	2	KRT
41	El Paraiso	JQ02	3420	20	?	Charred seed	-11.953	-77.1183	Caramanica et al, 2019	Unit I, Pit 2, Level J	SI	1	KRT
42	El Paraiso	JQ10	3455	20	?	Charred seed	-11.953	-77.1183	Caramanica et al, 2019	Unit I, Pit 2, Level G	SI	1	KRT
43	El Paraiso	I-13275	3550	100	100	Charcoal	-11.953	-77.1183	Quilter, 1985	From midden, Unit I, Pit 2, Level G (30-40 cm). Shicra bag 11.	SI	2	KRT
44	El Paraiso	I-13276	3560	100	100	Charcoal	-11.953	-77.1183	Quilter, 1985	From midden, Unit I, Pit 2, Level B (0-10 cm)	SI	2	KRT
45	Buena Vista	GX-32177	3790	80	?	Charcoal	-11.731	-76.9681	Benfer & Laura, 2019	Offering Chamber, Temple of the Fox, Level 400, carbonised twigs below level of rocks	SI	1	KRT
46	Buena Vista	GX-31276	3770	80	?	Charcoal	-11.731	-76.9681	Benfer & Laura, 2019	Offering Chamber, Temple of the Fox, Level 300, carbonized twigs below level of rocks	SI	1	KRT
47	Buena Vista	UGAMS- 2685	3600	30	?	Plant fragments	-11.731	-76.9681	Benfer & Laura, 2019	Solstice light chamber, plant fibers from mud plaster from fallen fragments of ceiling		1
48	Buena Vista	GX-31920	3660	90	?	Plant fragments	-11.731	-76.9681	Benfer & Laura, 2019	Temple of the Menacing Disk, plant fibers from mud plaster in the base of the sculpture		1
49	Buena Vista	UGAMS- 3128	3520	25	?	Charcoal	-11.731	-76.9681	Benfer & Laura, 2019	Temple of El Paraíso del Valle, carbonized twigs from a central hearth in Level 400	SI	1	KRT
50	Buena Vista	UGAMS- 3127	3450	25	?	Charcoal	-11.731	-76.9681	Benfer & Laura, 2019	Temple of El Paraíso del Valle, carbonized twigs from a central hearth in Level 300	SI	1	KRT
51	Buena Vista	UGAMS- 3126	3420	25	?	Charcoal	-11.731	-76.9681	Benfer & Laura, 2019	Temple of El Paraíso del Valle, carbonized twigs from floor, Level 200	SI	1	KRT
52	Buena Vista	UGAMS- 3129	3420	25	?	Charcoal	-11.731	-76.9681	Benfer & Laura, 2019	Temple of El Paraíso del Valle, carbonized twigs from between one floor and ultimate floor	SI	1	KRT
53	Pampa de las Llamas	UGa-5796	3745	85		Charcoal	-9.5	-78.22	Pozorski & Pozorski 1992	Domestic architecture, east side of site	NO	2	KRT
54	Pampa de las Llamas	UGa-5462	3515	70	100	Wood	-9.5	-78.22	Pozorski & Pozorski 1992	Huaca A, 2nd construction phase. From part of a wooden gate located at the NE entrance to Huaca A.	NO	2	KRT
55	Pampa de las Llamas	UGa-4506	3490	75	100	Charcoal	-9.5	-78.22	Pozorski & Pozorski 1992	Midden immediately east of Huaca A. Unit 3, level 3 (18-32 cm depth)	NO	2	KRT
56	Pampa de las Llamas	UGa-5609	3230	60		Charcoal	-9.5	-78.22	Pozorski & Pozorski 1992	midden below domestic architecture, east side of site	NO	2	KRT
57	Pampa de las Llamas	UGa-5797	3220	60		Wood	-9.5	-78.22	Pozorski & Pozorski 1992	aligned mound, east side of site	NO	2	KRT
58	Pampa de las Llamas	UGa-5630	3190	60		Charcoal	-9.5	-78.22	Pozorski & Pozorski 1992	fill of plaza in domestic architecture, west side of site	NO	2	KRT
59	Pampa de las Llamas	UGa-5794	3185	60		Wood	-9.5	-78.22	Pozorski & Pozorski 1992	Huaca A, 2nd construction phase	NO	2	KRT
60	Pampa de las Llamas	UGa-4511	3175	90		Charcoal	-9.5	-78.22	Pozorski & Pozorski 1992	midden, west side of site	NO	2	KRT
61	Pampa de las Llamas	UGa-5798	3160	85		Wood	-9.5	-78.22	Pozorski & Pozorski 1992	aligned enclosure immediately west of Huaca A	NO	2	KRT
62	Pampa de las Llamas	UGa-5873	3105	30		Wood	-9.5	-78.22	Pozorski & Pozorski 1992	Huaca A, 2nd construction phase	NO	2	KRT
63	Huaynuná	UGa-4522	4200	80	100	Charcoal	-9.35	-78.4	Pozorski & Pozorski 1990	Stratigraphic excavation L, level 6a.	NO	2	KRT
64	Huaynuná	UGa-5616	4130	230	100	Wood	-9.35	-78.4	Pozorski & Pozorski 1990	Post within bedrock, depression, hillside structure	NO	2	KRT
65	Huaynuná	UGa-4520	4040	65	100	Charcoal	-9.35	-78.4	Pozorski & Pozorski 1990	Stratigraphic excavation L, level 2b.	NO	2	KRT
66	Huaynuná	UGa-5619	3830	50	100	Wood	-9.35	-78.4	Pozorski & Pozorski 1990	Post within domestic architecture A	NO	2	KRT
67	Huaynuná	UGa-5612	3810	60	100	Charcoal	-9.35	-78.4	Pozorski & Pozorski 1990	Within ventilated hearth, Structure M	SI	2	KRT
68	Huaynuná	UGa-4521	3725	75	100	Charcoal	-9.35	-78.4	Pozorski & Pozorski 1990	Stratigraphic excavation L. Level 3c	NO	2	KRT
69	Huaynuná	UGa-5631	3690	60	100	Wood	-9.35	-78.4	Pozorski & Pozorski 1990	Within domestic architecture F	NO	2	KRT
70	Huaynuná	UGa-5617	3600	50	100	cane	-9.35	-78.4	Pozorski & Pozorski 1990	Within circular hillside structure. Platform.	NO	2	KRT
71	Huaynuná	UGa-5613	3600	100	100	Wood	-9.35	-78.4	Pozorski & Pozorski 1990	Post on terrace 3 , hillside structure.	NO	2	KRT
72	Huaynuná	UGa-5615	3580	90	100	Wood	-9.35	-78.4	Pozorski & Pozorski 1990	Post within remodeled terrace 2 floor, hillside	NO	2	KRT
73	Huaynuná	UGa-5614	3570	50	100	Charcoal	-9.35	-78.4	Pozorski & Pozorski 1990	Midden b hillside structure.	NO	2	KRT
74	Huaynuná	UGa-5618	3510	90	100	Wood	-9.35	-78.4	Pozorski & Pozorski 1990	Post on terrace 3, hillside structure	NO	2	KRT
75	Huaynuná	UGa-5632	3450	65	100	Wood	-9.35	-78.4	Pozorski & Pozorski 1990	Midden overlying hillside structure	NO	2	KRT
76	Taukachi - Konkan	Beta-535191	3250	30	?	Wood			Pozorski & Pozorski 2020	Room 6, west entrance, north pilaster, step 3	NO	1	KRT
77	Taukachi - Konkan	Beta-427589	3220	30	?	Wood			Pozorski & Pozorski 2020	Room 13, east entrance, north pilaster of landing	NO	1	KRT
78	Taukachi - Konkan	Beta-427588	3210	30	?	Wood			Pozorski & Pozorski 2020	Room 13, east entrance, south pilaster of landing	NO	1	KRT
79	Taukachi - Konkan	Beta-427587	3200	30	?	Wood			Pozorski & Pozorski 2020	Room 13, east entrance, north pilaster	NO	1	KRT
80	Taukachi - Konkan	Beta-535190	3170	30	?	Wood			Pozorski & Pozorski 2020	Room 6, north entrance, west pilaster	NO	1	KRT
81	Taukachi - Konkan	Beta-535192	3190	30	?	Wood			Pozorski & Pozorski 2020	East room, measuring sticks along west wall in southwest corner	NO	1	KRT
82	Taukachi - Konkan	Beta-477229	3140	30	?	Charcoal			Pozorski & Pozorski 2020	West room, central hearth floor	SI	1	KRT
83	Taukachi - Konkan	Beta-477227	3240	30	?	Charcoal			Pozorski & Pozorski 2020	Square A, level 3	NO	1	KRT
84	Taukachi - Konkan	Beta- 477228	3220	30	?	Charcoal			Pozorski & Pozorski 2020	Square E, level 3	NO	1	KRT
85	Acshipucoto	PRI-14-108-71	4230	29	?	Charcoal			Muro 2018		SI	1	MT
86	Acshipucoto	D-AMS 021271	4154	30	?	Charcoal			Muro 2019		SI	1	MT
87	Acshipucoto	D-AMS 014375	4144	28	?	Charcoal			Muro 2020		SI	1	MT
88	Acshipucoto	D-AMS 014376	4149	27	?	Charcoal			Muro 2021		SI	1	MT
89	Acshipucoto	D-AMS 021270	4129	30	?	Charcoal			Muro 2022		SI	1	MT
90	Acshipucoto	Beta - 423709	4100	30	?	Charcoal			Muro 2023		SI	1	MT
91	Acshipucoto	Beta - 423708	4050	30	?	Charcoal			Muro 2024		SI	1	MT
92	Acshipucoto	D-AMS 021269	3976	32	?	Charcoal			Muro 2025		SI	1	MT
93	Hualcayán	D-AMS 015768	3649	38	-12.2	Charcoal	-9.09	-77.45	Bria 2017	Perocolto Phase 1. Associated with activities in Mito-Kotosh spaces during the Initial Formative Period.	SI	1	KRT
94	Hualcayán	D-AMS 008213	3078	21			-9.09	-77.45	Bria 2017			1
95	Hualcayán	D-AMS 008215	3291	24			-9.09	-77.45	Bria 2017			1
96	Hualcayán	D-AMS 008216	3887	23	-16.7	Charcoal	-9.09	-77.45	Bria 2017	Perocolto Phase 1. Context linked to the construction and use of Mito-Kotosh structures.	SI	1	KRT
97	Chavin	AA69446	2644	45	?	Charcoal	-9.5937	-77.1777	Contreras 2010	Wood charcoal from the hearth deposit in the Mito-style structure.	SI	1	MT
98	Chavin	AA69447	2712	42	?	Charcoal	-9.5937	-77.1777	Contreras 2010	Wood charcoal from the hearth deposit in the Mito-style structure.	SI	1	MT
99	Chavin	AA69448	2506	43	?	Charcoal	-9.5937	-77.1777	Contreras 2010	Wood charcoal from the upper deposits associated with janabarroid ceramics.	SI	1	MT
100	Chavin	AA69449	2567	42	?	Charcoal	-9.5937	-77.1777	Contreras 2010	Wood charcoal from the upper deposits associated with janabarroid ceramics.	SI	1	MT
101	Piruro	LV-498	3050	90	?	Charcoal	-9.38	-76.51	Girault 1981	Strate 2, profondeur de l'echantillón (-60 cm)		2
102	Piruro	Gif-2302	3930	130	100	Charcoal	-9.38	-76.51	Girault 1981	Pit C.F.G.H., layer 3, deep 2 m, stone constructions and lithic artefacts		2	MT
103	Piruro	Gif-2304/5	4025	130	100	Charcoal	-9.38	-76.51	Girault 1981	Pit I.II.III.IV,layer 4, deep 2.7 m, stone constructions and lithic artefacts (-270 cm)		2	MT
104	Piruro	Gif-2304/7	4050	230	100	Charcoal	-9.38	-76.51	Girault 1981	Pit C.D.E.F., layer 4, deep 2.25 m, stone constructions and lithic artefacts (-225 cm)		2	MT
105	Piruro	Gif-2305	3880	130	100	Charcoal	-9.38	-76.51	Girault 1981	Pit G.H.I.J.K., layer 3, deep 1.6 m, stone constructions and lithic artefacts		2	MT
106	Piruro	Gif-7266	3770	60	100	Charcoal	-9.38	-76.51	Bonnier et Rozember 1988	Hearth of Temple P1		2

## Sheet: Model D
	Site	Lab	14C BP	Standard Deviation	Delta 13 Correction	Material	Latitude	Longitude	Reference	Context	KRT	CH	MT o KRT
1	Huaricanga	AA84560	4023	42	-22.8	Plant fiber	-10.5	-77.76	Piscitelli, 2014	Phase 01. Unit 9 H2-I2 C-Fl. 4. (Floor 18)	SI	1	KRT
2	Huaricanga	AA102184	4702	70	-20.2	Plant fiber	-10.5	-77.76	Piscitelli, 2014	Phase 01. Unit III A2 E-Fl. 1a. (Floor 31b)	SI	1	KRT
3	Huaricanga	AA102179	4403	72	-18.4	Plant fiber	-10.5	-77.76	Piscitelli, 2014	Phase 02. Unit III A3 D-Fl. 1 (Floor 23)	SI	1	KRT
4	Huaricanga	AA102180	3950	34	-12.01	Plant fiber	-10.5	-77.76	Piscitelli, 2014	Phase 02. Unit III n/a D-Fl. 3a (Floor 22a)	SI	1	KRT
5	Huaricanga	AA102181	3950	42	-26.2	Plant fiber	-10.5	-77.76	Piscitelli, 2014	Phase 02. Unit III n/a D-Fl. 2b (Floor 24b)	SI	1	KRT
6	Huaricanga	AA102182	3937	34	-12.2	Plant fiber	-10.5	-77.76	Piscitelli, 2014	Phase 02. Unit III n/a D-Fl. 3a (Floor 22a)	SI	1	KRT
7	Huaricanga	AA102185	4437	80	-20.2	Plant fiber	-10.5	-77.76	Piscitelli, 2014	Phase 02. Unit III A2 D-Fl. 1 (Floor 23)	SI	1	KRT
8	Huaricanga	AA84551	3926	43	-12.5	Plant fiber	-10.5	-77.76	Piscitelli, 2014	Phase 04. Unit 7 F7-F8 A-Fl. 1a (Floor 6a)	SI	1	KRT
9	Huaricanga	AA84552	3899	43	-12.5	Plant fiber	-10.5	-77.76	Piscitelli, 2014	Phase 04. Unit 7 n/a A-Fl. 1b (Floor 6b)	SI	1	KRT
10	La Galgada	TX3167	3820	60	100	Wood charbonized	-8.45	-78.15	Grieder & Bueno 1981	Fire pit in Floor 25, Sec D1, Sq D6	SI	2	MT
11	La Galgada	TK4449	3790	70	100	Charcoal	-8.45	-78.15	Grieder & Bueno 1981	Sec E12/I2, debris on Floor 20, interior of Preceramic period chamber in one of first buildings S of North Mound	SI	2	MT
12	La Galgada	TK4448	3650	60	100	Charcoal	-8.45	-78.15	Grieder & Bueno 1981	Sec H11/EG9, Floor 20, from firepit fill	SI	2	MT
13	La Galgada	TX-2463	3470	90	100	Charcoal	-8.45	-78.15	Grieder & Bueno 1981	From middden, base of massive wall, N gallery, Mound B	NO	2	MT
14	La Galgada	TX-2464	3440	80	100	Wood maguey	-8.45	-78.15	Grieder & Bueno 1981	From shaft wall leading to tomb built into temple after all floors had been constructed, S Gallery, Mound B, Phase 5	NO	2	MT
15	La Galgada	TX-3166	3660	80	100	Wood carbonized	-8.45	-78.15	Grieder & Bueno 1981	Fire pit in Floors 3, 5, 7, Sec C1, Sq J6	SI	2	MT
16	La Galgada	TX-3663	3540	50	100	Charcoal	-8.45	-78.15	Grieder & Bueno 1981	Sec G11/G8, pit in Floor 9, S wing of North Mound, 2 m below top of mound	NO	2	MT
17	La Galgada	TX-4446	3130	80	100	Charcoal	-8.45	-78.15	Grieder & Bueno 1981	Sec G12/H4, Floor 8, fire pit	SI	2	MT
18	La Galgada	TX-4447	3670	70	100	Charcoal	-8.45	-78.15	Grieder & Bueno 1981	Sec H11/EF10, Floor 30, from firepit fill in center of principal ritual chamber of North Temple	SI	2	MT
19	Caral	Beta-132593	3640	50	?	Plant fiber	-10.89	-79.52	Shady et al 2001	Construction fill of atrium on top of Piramide Mayor, Caral	SI	2	MT
20	Caral	ISGS-4724	3730	70	?	Plant fiber	-10.89	-79.52	Shady et al 2001	Construction fill of atrium on top of Piramide Mayor, Caral	SI	2	MT
21	Caral	Beta-134427	3740	90	?	Plant fiber	-10.89	-79.52	Shady et al 2001	Offering inside room on top of Piramide Mayor, Caral	SI	2	MT
22	Caral	ISGS-4738	3740	80	?	Plant fiber	-10.89	-79.52	Shady et al 2001	Floor construction center of stratified trash, rear of Sector N, Caral	NO	2	MT
23	Caral	ISGS-4740	3810	70	?	Plant fiber	-10.89	-79.52	Shady et al 2001	Upper level stratified trash, rear of Sector N, Caral	NO	2	MT
24	Caral	Beta-132589	3820	60	?	Plant fiber	-10.89	-79.52	Shady et al 2001	Upper level stratified trash, Sector A, Caral	NO	2	MT
25	Caral	ISGS-4710	3840	70	?	Plant fiber	-10.89	-79.52	Shady et al 2001	Wall construction around sunken circular plaza in front of Piramide Mayor, Caral	NO	2	MT
26	Caral	GS-4726	3900	70	?	Plant fiber	-10.89	-79.52	Shady et al 2001	Platform construction in front of Sector C, Caral	NO	2	MT
27	Caral	ISGS-4733	3960	80	?	Plant fiber	-10.89	-79.52	Shady et al 2001	Lower level stratified trash, Sector A, Caral	NO	2	MT
28	Caral	ISGS-4734	3970	90	?	Plant fiber	-10.89	-79.52	Shady et al 2001	Lower floor on top of wall around sunken circular platform, Sector L, Caral	NO	2	MT
29	Caral	Beta-134429	3970	40	?	Plant fiber	-10.89	-79.52	Shady et al 2001	Lowest level (7) stratified trash, in rear of Sector N, Caral	NO	2	MT
30	Caral	ISGS-4729	3990	70	?	Plant fiber	-10.89	-79.52	Shady et al 2001	Floor contact residential architecture, Sector A, Caral	NO	2	MT
31	Caral	ISGS-4732	3990	70	?	Plant fiber	-10.89	-79.52	Shady et al 2001	Upper level stratified trash, Sector A, Caral	NO	2	MT
32	Caral	Beta-134428	4020	40	?	Plant fiber	-10.89	-79.52	Shady et al 2001	Upper level (3) stratified trash, rear of Sector N, Caral	NO	2	MT
33	Caral	ISGS-4736	4060	70	?	Plant fiber	-10.89	-79.52	Shady et al 2001	Lowest level stratified trash, rear of Sector N, Caral	NO	2	MT
34	Caral	ISGS-4711	4090	90	?	Plant fiber	-10.89	-79.52	Shady et al 2001	Stratum under sunken circular plaza in front of Piramide Mayor, Caral	NO	2	MT
35	Gramalote	Beta-321940	3080	40	100	Charcoal	-7.89	-72.79	Prieto 2018	Kotosh like structure. The date is based on a sample from a circular hearth filled with vegetal charcoal	SI	1	KRT
36	Gramalote	Beta-321943	3140	40	-26	Charcoal	-7.89	-72.79	Prieto 2018	Public Architectural Compound (PAC). Contemporary with the Kotosh like structure.	NO	1	KRT
37	Gramalote	Beta-321945	2850	80	100	Charcoal	-7.89	-72.79	Prieto 2018	Public Architectural Compound (PAC). Contemporary with the Kotosh like structure.	NO	1	KRT
38	El Paraiso	Beta-8704	3020	60	100	Charcoal	-11.953	-77.1183	Quilter, 1985	From midden, Unit I, Pit 2, Level G (30-40 cm)	SI	2	KRT
39	El Paraiso	JQ02	3420	20	?	Charred seed	-11.953	-77.1183	Caramanica et al, 2019	Unit I, Pit 2, Level J	SI	1	KRT
40	El Paraiso	JQ10	3455	20	?	Charred seed	-11.953	-77.1183	Caramanica et al, 2019	Unit I, Pit 2, Level G	SI	1	KRT
41	Buena Vista	GX-32177	3790	80	?	Charcoal	-11.731	-76.9681	Benfer & Laura, 2019	Offering Chamber, Temple of the Fox, Level 400, carbonised twigs below level of rocks	SI	1	KRT
42	Buena Vista	GX-31276	3770	80	?	Charcoal	-11.731	-76.9681	Benfer & Laura, 2019	Offering Chamber, Temple of the Fox, Level 300, carbonized twigs below level of rocks	SI	1	KRT
43	Buena Vista	UGAMS- 2685	3600	30	?	Plant fragments	-11.731	-76.9681	Benfer & Laura, 2019	Solstice light chamber, plant fibers from mud plaster from fallen fragments of ceiling		1
44	Buena Vista	GX-31920	3660	90	?	Plant fragments	-11.731	-76.9681	Benfer & Laura, 2019	Temple of the Menacing Disk, plant fibers from mud plaster in the base of the sculpture		1
45	Buena Vista	UGAMS- 3128	3520	25	?	Charcoal	-11.731	-76.9681	Benfer & Laura, 2019	Temple of El Paraíso del Valle, carbonized twigs from a central hearth in Level 400	SI	1	KRT
46	Buena Vista	UGAMS- 3127	3450	25	?	Charcoal	-11.731	-76.9681	Benfer & Laura, 2019	Temple of El Paraíso del Valle, carbonized twigs from a central hearth in Level 300	SI	1	KRT
47	Buena Vista	UGAMS- 3126	3420	25	?	Charcoal	-11.731	-76.9681	Benfer & Laura, 2019	Temple of El Paraíso del Valle, carbonized twigs from floor, Level 200	SI	1	KRT
48	Buena Vista	UGAMS- 3129	3420	25	?	Charcoal	-11.731	-76.9681	Benfer & Laura, 2019	Temple of El Paraíso del Valle, carbonized twigs from between one floor and ultimate floor	SI	1	KRT
49	Pampa de las Llamas	UGa-5796	3745	85		Charcoal	-9.5	-78.22	Pozorski & Pozorski 1992	Domestic architecture, east side of site	NO	2	KRT
50	Pampa de las Llamas	UGa-5462	3515	70	100	Wood	-9.5	-78.22	Pozorski & Pozorski 1992	Huaca A, 2nd construction phase. From part of a wooden gate located at the NE entrance to Huaca A.	NO	2	KRT
51	Pampa de las Llamas	UGa-4506	3490	75	100	Charcoal	-9.5	-78.22	Pozorski & Pozorski 1992	Midden immediately east of Huaca A. Unit 3, level 3 (18-32 cm depth)	NO	2	KRT
52	Pampa de las Llamas	UGa-5609	3230	60		Charcoal	-9.5	-78.22	Pozorski & Pozorski 1992	midden below domestic architecture, east side of site	NO	2	KRT
53	Pampa de las Llamas	UGa-5797	3220	60		Wood	-9.5	-78.22	Pozorski & Pozorski 1992	aligned mound, east side of site	NO	2	KRT
54	Pampa de las Llamas	UGa-5630	3190	60		Charcoal	-9.5	-78.22	Pozorski & Pozorski 1992	fill of plaza in domestic architecture, west side of site	NO	2	KRT
55	Pampa de las Llamas	UGa-5794	3185	60		Wood	-9.5	-78.22	Pozorski & Pozorski 1992	Huaca A, 2nd construction phase	NO	2	KRT
56	Pampa de las Llamas	UGa-4511	3175	90		Charcoal	-9.5	-78.22	Pozorski & Pozorski 1992	midden, west side of site	NO	2	KRT
57	Pampa de las Llamas	UGa-5798	3160	85		Wood	-9.5	-78.22	Pozorski & Pozorski 1992	aligned enclosure immediately west of Huaca A	NO	2	KRT
58	Pampa de las Llamas	UGa-5873	3105	30		Wood	-9.5	-78.22	Pozorski & Pozorski 1992	Huaca A, 2nd construction phase	NO	2	KRT
59	Huaynuná	UGa-4522	4200	80	100	Charcoal	-9.35	-78.4	Pozorski & Pozorski 1990	Stratigraphic excavation L, level 6a.	NO	2	KRT
60	Huaynuná	UGa-4520	4040	65	100	Charcoal	-9.35	-78.4	Pozorski & Pozorski 1990	Stratigraphic excavation L, level 2b.	NO	2	KRT
61	Huaynuná	UGa-5619	3830	50	100	Wood	-9.35	-78.4	Pozorski & Pozorski 1990	Post within domestic architecture A	NO	2	KRT
62	Huaynuná	UGa-5612	3810	60	100	Charcoal	-9.35	-78.4	Pozorski & Pozorski 1990	Within ventilated hearth, Structure M	SI	2	KRT
63	Huaynuná	UGa-4521	3725	75	100	Charcoal	-9.35	-78.4	Pozorski & Pozorski 1990	Stratigraphic excavation L. Level 3c	NO	2	KRT
64	Huaynuná	UGa-5631	3690	60	100	Wood	-9.35	-78.4	Pozorski & Pozorski 1990	Within domestic architecture F	NO	2	KRT
65	Huaynuná	UGa-5617	3600	50	100	cane	-9.35	-78.4	Pozorski & Pozorski 1990	Within circular hillside structure. Platform.	NO	2	KRT
66	Huaynuná	UGa-5615	3580	90	100	Wood	-9.35	-78.4	Pozorski & Pozorski 1990	Post within remodeled terrace 2 floor, hillside	NO	2	KRT
67	Huaynuná	UGa-5614	3570	50	100	Charcoal	-9.35	-78.4	Pozorski & Pozorski 1990	Midden b hillside structure.	NO	2	KRT
68	Huaynuná	UGa-5618	3510	90	100	Wood	-9.35	-78.4	Pozorski & Pozorski 1990	Post on terrace 3, hillside structure	NO	2	KRT
69	Huaynuná	UGa-5632	3450	65	100	Wood	-9.35	-78.4	Pozorski & Pozorski 1990	Midden overlying hillside structure	NO	2	KRT
70	Taukachi - Konkan	Beta-535191	3250	30	?	Wood			Pozorski & Pozorski 2020	Room 6, west entrance, north pilaster, step 3	NO	1	KRT
71	Taukachi - Konkan	Beta-427589	3220	30	?	Wood			Pozorski & Pozorski 2020	Room 13, east entrance, north pilaster of landing	NO	1	KRT
72	Taukachi - Konkan	Beta-427588	3210	30	?	Wood			Pozorski & Pozorski 2020	Room 13, east entrance, south pilaster of landing	NO	1	KRT
73	Taukachi - Konkan	Beta-427587	3200	30	?	Wood			Pozorski & Pozorski 2020	Room 13, east entrance, north pilaster	NO	1	KRT
74	Taukachi - Konkan	Beta-535190	3170	30	?	Wood			Pozorski & Pozorski 2020	Room 6, north entrance, west pilaster	NO	1	KRT
75	Taukachi - Konkan	Beta-535192	3190	30	?	Wood			Pozorski & Pozorski 2020	East room, measuring sticks along west wall in southwest corner	NO	1	KRT
76	Taukachi - Konkan	Beta-477229	3140	30	?	Charcoal			Pozorski & Pozorski 2020	West room, central hearth floor	SI	1	KRT
77	Taukachi - Konkan	Beta-477227	3240	30	?	Charcoal			Pozorski & Pozorski 2020	Square A, level 3	NO	1	KRT
78	Taukachi - Konkan	Beta- 477228	3220	30	?	Charcoal			Pozorski & Pozorski 2020	Square E, level 3	NO	1	KRT
79	Acshipucoto	PRI-14-108-71	4230	29	?	Charcoal			Muro 2018		SI	1	MT
80	Acshipucoto	D-AMS 021271	4154	30	?	Charcoal			Muro 2019		SI	1	MT
81	Acshipucoto	D-AMS 014375	4144	28	?	Charcoal			Muro 2020		SI	1	MT
82	Acshipucoto	D-AMS 014376	4149	27	?	Charcoal			Muro 2021		SI	1	MT
83	Acshipucoto	D-AMS 021270	4129	30	?	Charcoal			Muro 2022		SI	1	MT
84	Acshipucoto	Beta - 423709	4100	30	?	Charcoal			Muro 2023		SI	1	MT
85	Acshipucoto	Beta - 423708	4050	30	?	Charcoal			Muro 2024		SI	1	MT
86	Acshipucoto	D-AMS 021269	3976	32	?	Charcoal			Muro 2025		SI	1	MT
87	Hualcayán	D-AMS 015768	3649	38	-12.2	Charcoal	-9.09	-77.45	Bria 2017	Perocolto Phase 1. Associated with activities in Mito-Kotosh spaces during the Initial Formative Period.	SI	1	KRT
88	Hualcayán	D-AMS 008213	3078	21			-9.09	-77.45	Bria 2017			1
89	Hualcayán	D-AMS 008215	3291	24			-9.09	-77.45	Bria 2017			1
90	Hualcayán	D-AMS 008216	3887	23	-16.7	Charcoal	-9.09	-77.45	Bria 2017	Perocolto Phase 1. Context linked to the construction and use of Mito-Kotosh structures.	SI	1	KRT
91	Chavin	AA69446	2644	45	?	Charcoal	-9.5937	-77.1777	Contreras 2010	Wood charcoal from the hearth deposit in the Mito-style structure.	SI	1	MT
92	Chavin	AA69447	2712	42	?	Charcoal	-9.5937	-77.1777	Contreras 2010	Wood charcoal from the hearth deposit in the Mito-style structure.	SI	1	MT
93	Chavin	AA69448	2506	43	?	Charcoal	-9.5937	-77.1777	Contreras 2010	Wood charcoal from the upper deposits associated with janabarroid ceramics.	SI	1	MT
94	Chavin	AA69449	2567	42	?	Charcoal	-9.5937	-77.1777	Contreras 2010	Wood charcoal from the upper deposits associated with janabarroid ceramics.	SI	1	MT
95	Piruro	LV-498	3050	90	?	Charcoal	-9.38	-76.51	Girault 1981	Strate 2, profondeur de l'echantillón (-60 cm)		2
96	Piruro	Gif-7266	3770	60	100	Charcoal	-9.38	-76.51	Bonnier et Rozember 1988	Hearth of Temple P1		2
