# Supplementary material for: Time, Ritual, and Bayesian Reasoning: Charting the Andean Kotosh Religious Tradition
Source: Research Square preprint supplement (doi:10.21203/rs.3.rs-6896121/v1), 2025-07-18
Supplement: Supplementary file 4 [file e6ccfb69d80314fbdd1fa064.xlsx]

## Sheet: Model A
		Results of order command . Cells show probability that events in columns occurred prior to events in corresponding row
Order	Start Kotosh Religious Tradition	Start Huaricanga	AA102184	AA102185	AA102179	AA84560	AA102181	AA102180	AA10282	AA84551	AA84552	End Huaricanga	Start Huaricoto	PUCP-XX1	II11142	I-11152	Tx-3580	Tx-3581	Tx-3582	Tx-3583	I-11151	End Huaricoto	Start Huaynuna	UGa-4522	UGa-5616	UGa-4520	UGa-5619	UGa-5612	UGa-4521	UGa-5631	UGa-5617	UGa-5613	UGa-5615	UGa-5614	UGa-5618	UGa-5632	End Huaynuna	Start Piruro	LV-498	LV-495	Gif-2302	Gif-2304/5	Gif-2304/7	Gif-2305	LV-494	Gif-7099	Gif-7100	Gif-7101	Gif-7102
Start Kotosh Religious Tradition	0	1	1	1	1	1	1	1	1	1	1	1	1	1	1	1	1	1	1	1	1	1	1	1	1	1	1	1	1	1	1	1	1	1	1	1	1	1	1	1	1	1	1	1	1	1	1	1	1
Start Huaricanga	0	0	1	1	1	1	1	1	1	1	1	1	0.5879	0.9964	1	1	0.9146	0.8774	1	1	1	1	0.997	1	0.9999	1	1	1	1	1	1	1	1	1	1	1	1	0.9929	1	1	1	1	0.9999	1	1	1	1	1	1
AA102184	0	0	0	0.9116	0.9404	1	1	1	1	1	1	1	0.3926	0.9919	1	1	0.8212	0.7556	1	1	1	1	0.9933	1	0.9998	1	1	1	1	1	1	1	1	1	1	1	1	0.986	1	1	1	1	0.9998	1	1	1	1	1	1
AA102185	0	0	0.08845	0	0.5833	1	1	1	1	1	1	1	0.10542	0.9406	0.9997	0.9999	0.4536	0.3741	1	1	1	1	0.9596	0.9991	0.9975	0.9999	1	1	1	1	1	1	1	1	1	1	1	0.9429	1	1	0.9999	0.9998	0.9976	1	1	1	1	1	1
AA102179	0	0	0.05962	0.4167	0	0.9999	1	1	1	1	1	1	0.07801	0.9248	0.9996	0.9999	0.3841	0.30932	1	1	1	1	0.9482	0.9985	0.9966	0.9999	1	1	1	1	1	1	1	1	1	1	1	0.9309	1	1	0.9999	0.9997	0.9969	1	1	1	1	1	1
AA84560	0	0	0	4.5e-05	8.9e-05	0	0.8432	0.8504	0.9185	0.933	0.9772	1	1.1e-05	0.08988	0.6434	0.8235	0.002862	0.001058	1	1	1	1	0.06445	0.17243	0.5835	0.4489	0.9973	0.9973	0.9995	1	1	0.9999	1	1	1	1	1	0.25147	1	1	0.8469	0.6939	0.7461	0.9074	1	1	1	1	1
AA102181	0	0	0	1e-06	0	0.15679	0	0.4904	0.5987	0.6474	0.7408	1	0	0.024623	0.4394	0.6468	0.000462	0.000155	1	1	1	1	0.008475	0.03822	0.4133	0.1643	0.9186	0.9366	0.9869	0.9989	1	0.9978	0.9995	1	1	1	1	0.11288	1	1	0.6801	0.4879	0.599	0.7726	1	1	1	1	0.9999
AA102180	0	0	0	0	0	0.14958	0.5096	0	0.6147	0.6641	0.7608	1	0	0.02389	0.4437	0.654	0.000415	0.000141	1	1	1	1	0.007502	0.03532	0.4161	0.16006	0.9283	0.9441	0.9886	0.9991	1	0.9981	0.9996	1	1	1	1	0.11307	1	1	0.6868	0.4925	0.6032	0.7794	1	1	1	1	0.9999
AA10282	0	0	0	0	0	0.08146	0.4013	0.3853	0	0.5591	0.6652	1	0	0.016043	0.3895	0.5995	0.000274	7.4e-05	1	1	1	1	0.003949	0.019054	0.3744	0.10313	0.8953	0.9187	0.9833	0.9987	1	0.9972	0.9994	1	1	1	1	0.08502	1	1	0.6357	0.4367	0.5621	0.7355	1	1	1	1	0.9999
AA84551	0	0	0	0	0	0.06695	0.3526	0.3359	0.4409	0	0.6041	1	0	0.014049	0.3634	0.569	0.000231	6.7e-05	1	1	1	1	0.003303	0.015916	0.3561	0.0887	0.8668	0.8968	0.978	0.9979	1	0.9963	0.9991	1	0.9999	1	1	0.0745	1	1	0.6066	0.4096	0.5409	0.7088	1	1	1	1	0.9999
AA84552	0	0	0	0	0	0.022811	0.25922	0.23916	0.3348	0.3959	0	1	0	0.008465	0.31287	0.5141	0.000124	3.5e-05	1	1	1	1	0.000998	0.005351	0.3187	0.04911	0.8203	0.8608	0.9689	0.9965	1	0.9947	0.9987	1	0.9999	1	1	0.05211	1	1	0.5542	0.3575	0.5005	0.6615	1	1	1	1	0.9998
End Huaricanga	0	0	0	0	0	0	0	0	0	0	0	0	0	0.001479	0.11177	0.22405	1.9e-05	7e-06	0.9998	0.9999	0.9999	1	3e-06	0.000211	0.15711	0.005902	0.3876	0.4699	0.7407	0.8384	0.9309	0.8943	0.9203	0.9469	0.9522	0.9714	0.9836	0.007902	0.9978	0.9712	0.26004	0.13509	0.27908	0.3505	0.9704	0.9995	0.9944	0.9963	0.9235
Start Huaricoto	0	0.4121	0.6074	0.8946	0.922	1	1	1	1	1	1	1	0	1	1	1	1	1	1	1	1	1	0.9935	0.9999	0.9997	1	1	1	1	1	1	1	1	1	1	1	1	0.9875	1	1	1	1	0.9997	1	1	1	1	1	1
PUCP-XX1	0	0.003565	0.008059	0.05944	0.07519	0.9101	0.9754	0.9761	0.984	0.986	0.9915	0.9985	0	0	0.8907	0.9517	0.07077	0.04618	1	1	1	1	0.5369	0.7373	0.8725	0.8824	0.9973	0.9978	0.9995	0.9999	1	0.9999	1	1	1	1	1	0.6426	1	1	0.9629	0.9188	0.9207	0.9782	1	1	1	1	1
II11142	0	2e-06	4e-06	0.000256	0.000378	0.3566	0.5606	0.5563	0.6105	0.6366	0.6871	0.8882	0	0.10928	0	0.6548	0.004871	0.001953	1	1	1	1	0.10609	0.19376	0.486	0.3402	0.841	0.8696	0.9561	0.9839	0.9982	0.9899	0.9952	0.9992	0.9988	0.9999	1	0.21551	1	0.9998	0.6837	0.5415	0.6275	0.7558	0.9997	1	1	1	0.9966
I-11152	0	0	0	6.5e-05	0.000109	0.17655	0.3532	0.346	0.4005	0.431	0.4859	0.776	0	0.04826	0.3452	0	0.001969	0.000768	1	1	1	1	0.04241	0.08409	0.3511	0.17374	0.7013	0.7488	0.9012	0.9537	0.9925	0.9738	0.9853	0.9966	0.9956	0.9996	1	0.11388	1	0.999	0.5333	0.3826	0.4989	0.6191	0.9987	1	1	1	0.9883
Tx-3580	0	0.08536	0.17875	0.5464	0.6159	0.9971	0.9995	0.9996	0.9997	0.9998	0.9999	1	0	0.9292	0.9951	0.998	0	0.4151	1	1	1	1	0.944	0.9878	0.9926	0.9959	1	1	1	1	1	1	1	1	1	1	1	0.9358	1	1	0.9986	0.9967	0.9948	0.9993	1	1	1	1	1
Tx-3581	0	0.12264	0.24444	0.6259	0.6907	0.9989	0.9998	0.9999	0.9999	0.9999	1	1	0	0.9538	0.998	0.9992	0.5849	0	1	1	1	1	0.9633	0.995	0.9963	0.9984	1	1	1	1	1	1	1	1	1	1	1	0.9527	1	1	0.9995	0.9986	0.9972	0.9997	1	1	1	1	1
Tx-3582	0	0	0	0	0	0	0	0	0	0	0	0.000161	0	0	0	0	0	0	0	0.742	0.7169	1	0	0	0	0	0	0	0	0	0	0	0	0	0	0	0.000193	0	0.001447	0	0	0	0	0	0	0.05004	7e-06	6.8e-05	0
Tx-3583	0	0	0	0	0	0	0	0	0	0	0	8.2e-05	0	0	0	0	0	0	0.25795	0	0.4728	1	0	0	0	0	0	0	0	0	0	0	0	0	0	0	7.1e-05	0	0	0	0	0	0	0	0	6.1e-05	0	0	0
I-11151	0	0	0	0	0	0	0	0	0	0	0	8.8e-05	0	0	0	0	0	0	0.28311	0.5272	0	1	0	0	0	0	0	0	0	0	0	0	0	0	0	0	8.2e-05	0	1e-06	0	0	0	0	0	0	0.000332	0	0	0
End Huaricoto	0	0	0	0	0	0	0	0	0	0	0	2.9e-05	0	0	0	0	0	0	0	0	0	0	0	0	0	0	0	0	0	0	0	0	0	0	0	0	2.3e-05	0	0	0	0	0	0	0	0	9e-06	0	0	0
Start Huaynuna	0	0.003033	0.006686	0.04042	0.05178	0.9355	0.9915	0.9925	0.9961	0.9967	0.999	1	0.00646	0.4631	0.8939	0.9576	0.05603	0.03674	1	1	1	1	0	1	1	1	1	1	1	1	1	1	1	1	1	1	1	0.6265	1	1	0.9697	0.9259	0.9234	0.9837	1	1	1	1	1
UGa-4522	0	2e-06	6e-06	0.000943	0.001459	0.8276	0.9618	0.9647	0.9809	0.9841	0.9946	0.9998	8.5e-05	0.26269	0.8062	0.9159	0.012244	0.005014	1	1	1	1	0	0	0.8015	0.7976	0.9994	0.9995	0.9999	1	1	1	1	1	1	1	1	0.4631	1	1	0.9336	0.8506	0.8612	0.9625	1	1	1	1	1
UGa-5616	0	7.1e-05	0.000195	0.002485	0.003431	0.4165	0.5867	0.5839	0.6256	0.6439	0.6813	0.8429	0.000258	0.12749	0.514	0.6489	0.007437	0.003689	1	1	1	1	0	0.19849	0	0.3869	0.7991	0.8248	0.9139	0.9465	0.9819	0.9684	0.9777	0.9883	0.9897	0.9968	1	0.24212	1	0.9959	0.6752	0.5528	0.6258	0.7368	0.9954	1	1	1	0.9787
UGa-4520	0	0	0	8.1e-05	0.000121	0.5511	0.8357	0.8399	0.8969	0.9113	0.9509	0.9941	1.2e-05	0.11759	0.6598	0.8263	0.004128	0.00157	1	1	1	1	0	0.20238	0.6131	0	0.9869	0.9894	0.9977	0.9998	1	0.9996	0.9999	1	1	1	1	0.28426	1	1	0.8489	0.7093	0.757	0.9049	1	1	1	1	1
UGa-5619	0	0	0	0	0	0.002708	0.08143	0.07167	0.10471	0.13319	0.17972	0.6124	0	0.002726	0.15895	0.29866	3.2e-05	1e-05	1	1	1	1	0	0.000552	0.20088	0.013089	0	0.5874	0.8596	0.9529	0.9976	0.9704	0.9872	0.9993	0.9975	1	1	0.01685	1	0.9997	0.3388	0.18812	0.3447	0.441	0.9995	1	1	1	0.9928
UGa-5612	0	0	0	0	0	0.002664	0.06345	0.05585	0.08126	0.10316	0.13922	0.5301	0	0.002181	0.1304	0.25124	2.6e-05	1e-05	1	1	1	1	0	0.000547	0.17518	0.010613	0.4126	0	0.7975	0.9081	0.9906	0.9496	0.9737	0.9966	0.9934	0.9998	1	0.013128	1	0.9989	0.28876	0.1555	0.30548	0.3838	0.9984	1	1	1	0.9808
UGa-4521	0	0	0	0	0	0.000508	0.013137	0.011357	0.016672	0.021985	0.031097	0.25927	0	0.000543	0.04394	0.09882	5e-06	1e-06	1	1	1	1	0	0.000111	0.08608	0.002288	0.14045	0.20254	0	0.6378	0.8992	0.8113	0.8662	0.9468	0.9486	0.9934	1	0.002969	1	0.9857	0.1235	0.05448	0.16699	0.18476	0.9825	1	1	1	0.8709
UGa-5631	0	0	0	0	0	2.4e-05	0.001111	0.000863	0.001313	0.002137	0.003523	0.1616	0	9.1e-05	0.016111	0.04627	1e-06	1e-06	1	1	1	1	0	4e-06	0.05353	0.000227	0.04707	0.09192	0.3622	0	0.8479	0.7399	0.8097	0.9197	0.9245	0.9911	1	0.000348	1	0.9791	0.0647	0.021944	0.11456	0.10953	0.9745	1	1	1	0.8119
UGa-5617	0	0	0	0	0	0	0	0	0	2e-06	8e-06	0.06905	0	4e-06	0.001822	0.007495	0	0	1	1	1	1	0	0	0.018138	0	0.002378	0.009404	0.10082	0.15208	0	0.4624	0.5405	0.6546	0.7479	0.9238	1	2e-06	1	0.8977	0.01346	0.00301	0.04769	0.02845	0.8878	1	0.9999	1	0.5058
UGa-5613	0	0	0	0	0	0.000106	0.002236	0.001923	0.002778	0.003671	0.005306	0.10574	0	0.000101	0.0101	0.02619	1e-06	0	1	1	1	1	0	2.6e-05	0.03164	0.000406	0.02957	0.05039	0.18874	0.26013	0.5376	0	0.5641	0.6464	0.7279	0.8718	1	0.000513	1	0.861	0.03627	0.013349	0.07082	0.06107	0.8545	1	0.9994	1	0.541
UGa-5615	0	0	0	0	0	1.5e-05	0.0005	0.000414	0.000608	0.000863	0.001344	0.07974	0	2.9e-05	0.004844	0.014679	0	0	1	1	1	1	0	4e-06	0.022301	9.4e-05	0.012844	0.02627	0.1338	0.19032	0.4595	0.4359	0	0.5785	0.6784	0.8418	1	0.000135	1	0.8323	0.022011	0.006821	0.05384	0.0401	0.8254	1	0.9993	1	0.472
UGa-5614	0	0	0	0	0	0	0	0	0	0	1e-06	0.0531	0	0	0.000771	0.003422	0	0	1	1	1	1	0	0	0.01171	0	0.000749	0.003398	0.05322	0.08032	0.3454	0.3536	0.4215	0	0.6374	0.8463	1	1e-06	1	0.8274	0.007022	0.001374	0.03398	0.016099	0.8177	1	0.9998	1	0.378
UGa-5618	0	0	0	0	0	1e-06	3.9e-05	3.3e-05	4.9e-05	8.1e-05	0.000126	0.04778	0	6e-06	0.001226	0.004394	0	0	1	1	1	1	0	0	0.010267	9e-06	0.00255	0.006605	0.05143	0.07553	0.25214	0.27208	0.3216	0.3626	0	0.6941	1	1.5e-05	1	0.7066	0.007635	0.001876	0.029446	0.015723	0.701	1	0.9977	0.9998	0.29014
UGa-5632	0	0	0	0	0	0	0	0	0	0	0	0.028641	0	0	6.2e-05	0.000379	0	0	1	1	1	1	0	0	0.003174	0	2.9e-05	0.000176	0.00657	0.008861	0.07625	0.12824	0.15822	0.15374	0.30586	0	1	0	1	0.5655	0.001186	0.000158	0.014111	0.003364	0.5627	1	0.9957	0.9997	0.13561
End Huaynuna	0	0	0	0	0	0	0	0	0	0	0	0.016361	0	0	3e-06	4.2e-05	0	0	0.9998	0.9999	0.9999	1	0	0	0	0	0	0	0	0	0	0	0	0	0	0	0	0	0.9872	0.28094	0.000219	1.8e-05	0.005583	0.000711	0.2868	0.999	0.9171	0.965	0.03622
Start Piruro	0	0.007136	0.014	0.05713	0.06912	0.7485	0.8871	0.8869	0.915	0.9255	0.9479	0.9921	0.012541	0.3574	0.7845	0.8861	0.06419	0.04729	1	1	1	1	0.3735	0.5369	0.7579	0.7157	0.9832	0.9869	0.997	0.9997	1	0.9995	0.9999	1	1	1	1	0	1	1	1	1	1	1	1	1	1	1	1
LV-498	0	0	0	0	0	0	0	0	0	0	0	0.002157	0	0	0	0	0	0	0.9986	1	1	1	0	0	0	0	0	0	0	0	0	4e-06	3e-06	2e-06	1.9e-05	4.1e-05	0.012769	0	0	0.000211	0	0	1.4e-05	0	0.000253	0.9825	0.04792	0.17247	2e-06
LV-495	0	0	0	0	0	0	2e-06	1e-06	1e-06	2e-06	3e-06	0.028786	0	1e-06	0.000235	0.000996	0	0	1	1	1	1	0	0	0.004149	1e-06	0.000317	0.001116	0.014335	0.020931	0.10226	0.13903	0.16767	0.17256	0.29337	0.4345	0.7191	0	0.9998	0	0.002094	0.0004	0.014666	0.004969	0.5	1	0.985	0.9981	0.13918
Gif-2302	0	0	1e-06	5.3e-05	7.7e-05	0.15308	0.3199	0.31316	0.3643	0.3934	0.4458	0.74	5e-06	0.03712	0.3163	0.4667	0.001351	0.000541	1	1	1	1	0.030297	0.06645	0.3248	0.15106	0.6612	0.7112	0.8765	0.9353	0.9865	0.9637	0.978	0.993	0.9924	0.9988	0.9998	0	1	0.9979	0	0.3409	0.4675	0.5888	0.9974	1	1	1	0.981
Gif-2304/5	0	1e-06	5e-06	0.000247	0.000336	0.30609	0.5121	0.5075	0.5633	0.5904	0.6425	0.8649	2.5e-05	0.08118	0.4585	0.6174	0.003298	0.001384	1	1	1	1	0.07408	0.14941	0.4472	0.29072	0.8119	0.8445	0.9455	0.9781	0.997	0.9867	0.9932	0.9986	0.9981	0.9998	1	0	1	0.9996	0.6591	0	0.6032	0.736	0.9995	1	1	1	0.995
Gif-2304/7	0	7.7e-05	0.000212	0.002363	0.003076	0.25393	0.401	0.3968	0.4379	0.4591	0.4995	0.7209	0.000256	0.07928	0.3725	0.5011	0.005212	0.002778	1	1	1	1	0.0766	0.13877	0.3742	0.24297	0.6553	0.6945	0.833	0.8854	0.9523	0.9292	0.9462	0.966	0.9706	0.9859	0.9944	0	1	0.9853	0.5325	0.3968	0	0.6041	0.9845	1	0.9996	0.9999	0.947
Gif-2305	0	0	0	2.1e-05	3.3e-05	0.09262	0.22738	0.22063	0.26453	0.29123	0.3385	0.6495	3e-06	0.021782	0.24419	0.3809	0.000721	0.000266	1	1	1	1	0.016268	0.03755	0.26315	0.09513	0.559	0.6162	0.8152	0.8905	0.9716	0.9389	0.9599	0.9839	0.9843	0.9966	0.9993	0	1	0.995	0.4112	0.26399	0.3959	0	0.9942	1	1	1	0.9635
LV-494	0	0	0	0	0	0	2e-06	2e-06	6e-06	6e-06	1.3e-05	0.029628	0	1e-06	0.00033	0.001319	0	0	1	1	1	1	0	0	0.004566	1e-06	0.000502	0.001623	0.017549	0.025515	0.1122	0.14546	0.17456	0.18226	0.29899	0.4373	0.7132	0	0.9997	0.5	0.002567	0.000531	0.015455	0.005831	0	1	0.9827	0.9976	0.1467
Gif-7099	0	0	0	0	0	0	0	0	0	0	0	0.000537	0	0	0	0	0	0	0.95	0.9999	0.9997	1	0	0	0	0	0	0	0	0	0	0	0	0	0	0	0.000956	0	0.01746	0	0	0	0	0	0	0	4.7e-05	0.000523	0
Gif-7100	0	0	0	0	0	0	0	0	0	0	0	0.005575	0	0	0	0	0	0	1	1	1	1	0	0	1.3e-05	0	0	0	3e-06	5e-06	8.7e-05	0.000561	0.000661	0.000241	0.002332	0.004312	0.08293	0	0.9521	0.014953	3e-06	0	0.000379	9e-06	0.017279	1	0	0.7809	0.000363
Gif-7101	0	0	0	0	0	0	0	0	0	0	0	0.003662	0	0	0	0	0	0	0.9999	1	1	1	0	0	1e-06	0	0	0	0	0	2e-06	3.5e-05	4e-05	8e-06	0.000191	0.000341	0.03501	0	0.8275	0.001873	0	0	7.3e-05	1e-06	0.002398	0.9995	0.21914	0	1.7e-05
Gif-7102	0	0	0	0	0	1e-06	6.2e-05	5.6e-05	7.2e-05	0.000138	0.00025	0.07647	0	1.3e-05	0.003355	0.011686	0	0	1	1	1	1	0	0	0.021344	1.4e-05	0.007183	0.019158	0.12911	0.18809	0.4942	0.459	0.528	0.622	0.7099	0.8644	0.9638	0	1	0.8608	0.019033	0.005043	0.05297	0.03655	0.8533	1	0.9996	1	0
Gif-7103	0	0	0	0	0	0	0	0	0	0	0	0.00627	0	0	0	1e-06	0	0	1	1	1	1	0	0	2.6e-05	0	0	0	8e-06	1e-05	0.000186	0.001087	0.001201	0.000513	0.004099	0.007932	0.10506	0	0.9691	0.023743	3e-06	1e-06	0.000524	1.8e-05	0.026951	1	0.5838	0.8395	0.000734
Gif-7104	0	0.000121	0.000299	0.002568	0.00328	0.16521	0.26384	0.26049	0.28861	0.30418	0.3327	0.525	0.000324	0.05449	0.25255	0.3469	0.004312	0.002533	1	1	1	1	0.0529	0.09277	0.26209	0.15935	0.4575	0.4931	0.6339	0.6911	0.7963	0.771	0.7966	0.8266	0.8472	0.8874	0.9322	0	0.9962	0.893	0.3664	0.26289	0.353	0.426	0.8918	0.9998	0.9825	0.9911	0.7934
Gif-7266	0	0	0	0	0	0.000652	0.022604	0.019627	0.028544	0.03815	0.05441	0.366	0	0.000902	0.07203	0.1547	1.1e-05	3e-06	1	1	1	1	1.3e-05	0.000156	0.12096	0.003817	0.23953	0.3243	0.6616	0.8037	0.9702	0.9007	0.9397	0.9878	0.9821	0.9992	1	0	1	0.9965	0.18532	0.0862	0.22381	0.26602	0.9952	1	1	1	0.9494
End Piruro	0	0	0	0	0	0	0	0	0	0	0	0.00035	0	0	0	0	0	0	0.7844	0.917	0.9092	0.9784	0	0	0	0	0	0	0	0	0	0	0	0	0	0	0.00051	0	0	0	0	0	0	0	0	0	0	0	0
Start Acshicupoto	0	0.001697	0.004089	0.04446	0.06074	0.9887	0.9999	1	1	1	1	1	0.004848	0.6793	0.969	0.9887	0.07447	0.04468	1	1	1	1	0.7468	0.9421	0.9651	0.9856	1	1	1	1	1	1	1	1	1	1	1	0.783	1	1	0.9941	0.9837	0.9753	0.997	1	1	1	1	1
PRI-14-108-71	0	0	0	0.001165	0.002036	0.9738	0.9997	1	1	1	1	1	0.000195	0.5107	0.9281	0.9733	0.027917	0.011775	1	1	1	1	0.5773	0.8484	0.9247	0.9608	1	1	1	1	1	1	1	1	1	1	1	0.6815	1	1	0.985	0.9596	0.951	0.9925	1	1	1	1	1
D-AMS 021271	0	0	0	0.000553	0.000962	0.9582	0.9994	0.9999	1	0.9999	1	1	8.9e-05	0.3936	0.891	0.9591	0.019122	0.007844	1	1	1	1	0.4386	0.7239	0.8758	0.9226	1	1	1	1	1	1	1	1	1	1	1	0.5972	1	1	0.9737	0.9309	0.9242	0.9868	1	1	1	1	1
D-AMS 014375	0	0	0	0.000518	0.000904	0.9545	0.9993	0.9998	0.9999	0.9999	1	1	9.1e-05	0.3776	0.8852	0.9567	0.018011	0.00742	1	1	1	1	0.4184	0.7011	0.8669	0.9141	1	1	1	1	1	1	1	1	1	1	1	0.5843	1	1	0.9715	0.9257	0.9193	0.9856	1	1	1	1	1
D-AMS 014376	0	0	0	0.00053	0.000907	0.9579	0.9994	0.9999	1	0.9999	1	1	8.6e-05	0.388	0.8895	0.9585	0.018736	0.007709	1	1	1	1	0.4321	0.7175	0.8731	0.921	1	1	1	1	1	1	1	1	1	1	1	0.5935	1	1	0.9733	0.9294	0.9227	0.9865	1	1	1	1	1
D-AMS 021270	0	0	0	0.000446	0.00076	0.9421	0.9985	0.9993	0.9997	0.9996	0.9999	1	8.3e-05	0.3464	0.8708	0.9507	0.016237	0.006644	1	1	1	1	0.3771	0.6502	0.846	0.8914	1	1	1	1	1	1	1	1	1	1	1	0.5557	1	1	0.9658	0.9123	0.9079	0.9825	1	1	1	1	1
Beta - 423709	0	0	0	0.000298	0.000519	0.8996	0.9927	0.9944	0.9972	0.9975	0.9993	1	5.4e-05	0.27355	0.8331	0.9337	0.011961	0.004762	1	1	1	1	0.28247	0.5269	0.7931	0.8255	1	1	1	1	1	1	1	1	1	1	1	0.486	1	1	0.95	0.8766	0.8788	0.9735	1	1	1	1	1
Beta - 423708	0	0	0	6.3e-05	0.000105	0.6857	0.9299	0.9354	0.9665	0.9723	0.9925	1	1.2e-05	0.12476	0.7158	0.871	0.003975	0.001479	1	1	1	1	0.0998	0.25431	0.6519	0.597	0.9997	0.9995	0.9999	1	1	1	1	1	1	1	1	0.3173	1	1	0.8917	0.765	0.7946	0.9379	1	1	1	1	1
D-AMS 021269	0	0	0	2e-06	2e-06	0.482	0.846	0.8528	0.92	0.9347	0.9783	0.9996	0	0.06209	0.6281	0.8172	0.001305	0.000416	1	1	1	1	0.030516	0.12107	0.5619	0.4188	0.9979	0.9977	0.9996	1	1	0.9999	1	1	1	1	1	0.22273	1	1	0.8418	0.6806	0.7353	0.9049	1	1	1	1	1
End Acshicupoto	0	0	0	0	1e-06	0.24008	0.6286	0.6265	0.7344	0.7701	0.8498	0.9725	0	0.0348	0.5032	0.7077	0.000702	0.000213	1	1	1	1	0.011518	0.06021	0.4618	0.2353	0.9488	0.958	0.9874	0.9956	0.9987	0.9967	0.9981	0.9991	0.9991	0.9996	0.9998	0.14657	1	0.9996	0.7377	0.5539	0.6453	0.8205	0.9995	1	0.9999	1	0.9984
Start Shillacoto	0	0.016428	0.02601	0.05586	0.06117	0.16881	0.19655	0.19554	0.203	0.20691	0.2146	0.28112	0.021619	0.116	0.19048	0.21904	0.0531	0.0459	1	1	1	1	0.1187	0.1419	0.19475	0.166	0.2497	0.2614	0.31441	0.3375	0.4	0.3954	0.4114	0.4263	0.4577	0.5014	0.6129	0.13581	0.9827	0.5242	0.22683	0.19811	0.22759	0.24507	0.5254	1	0.8542	0.9348	0.4045
TK-43	0	0	0	0	0	0	0	0	0	0	0	0.004839	0	0	0	0	0	0	1	1	1	1	0	0	1.4e-05	0	0	0	5e-06	3e-06	8.6e-05	0.000532	0.000559	0.000258	0.001984	0.003588	0.06619	0	0.8992	0.011184	2e-06	0	0.000288	9e-06	0.01283	0.9996	0.3869	0.665	0.00033
End Shillacoto	0	0	0	0	0	0	0	0	0	0	0	0.001765	0	0	0	0	0	0	0.8583	0.9118	0.9074	0.9646	0	0	2e-06	0	0	0	0	0	1.2e-05	7.6e-05	8e-05	3.1e-05	0.000268	0.000483	0.015911	0	0.3652	0.001622	0	0	4.3e-05	2e-06	0.001952	0.6954	0.08206	0.18169	4.2e-05
Start Hualcayan	0	0.017236	0.029316	0.07665	0.08691	0.5181	0.719	0.7141	0.7706	0.796	0.8443	0.9772	0.024675	0.26069	0.6485	0.786	0.07635	0.06265	1	1	1	1	0.26282	0.3628	0.6266	0.5044	0.9494	0.9606	0.9915	0.9991	1	0.9986	0.9997	1	1	1	1	0.369	1	1	0.8089	0.6875	0.7476	0.8645	1	1	1	1	1
D-AMS 008213	0	0	0	0	0	0	0	0	0	0	0	0.002571	0	0	0	0	0	0	0.9999	1	1	1	0	0	0	0	0	0	0	0	0	0	0	0	0	0	0.014737	0	0.6859	1e-06	0	0	8e-06	0	3e-06	0.9994	0.03755	0.22718	0
D-AMS 008215	0	0	0	0	0	0	0	0	0	0	0	0.006778	0	0	0	0	0	0	1	1	1	1	0	0	9e-06	0	0	0	0	0	0	0.000175	0.000142	0	0.001176	0.001877	0.10909	0	0.9955	0.016293	0	0	0.000484	2e-06	0.020495	1	0.7504	0.9556	3.4e-05
D-AMS 015768	0	0	0	0	0	0	1e-06	0	1e-06	4e-06	2.5e-05	0.10037	0	6e-06	0.004529	0.017393	0	0	1	1	1	1	0	0	0.031529	2e-06	0.00708	0.026204	0.20964	0.31316	0.7433	0.6323	0.7157	0.8597	0.88	0.986	0.9995	1e-05	1	0.9658	0.028771	0.007178	0.07476	0.05621	0.9586	1	1	1	0.7059
D-AMS 008216	0	0	0	0	0	0.004353	0.1757	0.15528	0.22727	0.2827	0.3718	0.8605	0	0.005256	0.26109	0.4519	6.6e-05	1.8e-05	1	1	1	1	8.2e-05	0.001045	0.28205	0.026539	0.7586	0.8134	0.9581	0.995	1	0.9929	0.9982	1	0.9998	1	1	0.03437	1	1	0.4943	0.30352	0.4578	0.6054	1	1	1	1	0.9997
End Hualcayan	0	0	0	0	0	0	0	0	0	0	0	0.001188	0	0	0	0	0	0	0.9088	0.9503	0.9473	0.9822	0	0	0	0	0	0	0	0	0	0	0	0	0	0	0.004757	0	0.24686	0	0	0	1e-06	0	0	0.7469	0.006492	0.04573	0
Start Caral	0	2e-06	7e-06	0.000389	0.000604	0.9008	0.9943	0.996	0.998	0.998	0.9996	1	3.6e-05	0.23931	0.8243	0.9307	0.009545	0.003885	1	1	1	1	0.24039	0.4947	0.7812	0.8206	1	1	1	1	1	1	1	1	1	1	1	0.4634	1	1	0.9483	0.8708	0.873	0.9729	1	1	1	1	1
Beta-132593	0	0	0	0	0	0	3.6e-05	1.8e-05	3e-05	0.000135	0.00034	0.15443	0	3.1e-05	0.011979	0.04034	1e-06	0	1	1	1	1	0	0	0.05306	2e-05	0.026497	0.07455	0.3903	0.5554	0.9083	0.7839	0.8533	0.9603	0.9507	0.9973	1	6.5e-05	1	0.9892	0.06011	0.017438	0.11585	0.10741	0.9857	1	1	1	0.8642
ISGS-4724	0	0	0	0	0	0.000475	0.015264	0.013208	0.019256	0.025859	0.03712	0.31153	0	0.000639	0.055	0.12411	6e-06	1e-06	1	1	1	1	1.5e-05	0.000115	0.10428	0.002616	0.18074	0.26077	0.6098	0.7648	0.9657	0.8835	0.9291	0.9869	0.9794	0.9993	1	0.003546	1	0.9961	0.15417	0.06891	0.19896	0.22771	0.9945	1	1	1	0.9402
Beta-134427	0	0	0	0	0	0.003301	0.04034	0.03618	0.05128	0.06415	0.08545	0.3922	0	0.001559	0.08661	0.17405	1.8e-05	6e-06	1	1	1	1	0.000141	0.000805	0.13177	0.007714	0.26804	0.3467	0.6672	0.804	0.9703	0.9015	0.9402	0.9882	0.9822	0.9993	1	0.008652	1	0.9965	0.20639	0.10409	0.23886	0.28559	0.9952	1	1	1	0.9498
ISGS-4738	0	0	0	0	0	0.001593	0.029461	0.025901	0.0375	0.04815	0.0658	0.3658	0	0.00112	0.07484	0.15665	1.2e-05	3e-06	1	1	1	1	6.2e-05	0.000376	0.1224	0.005243	0.2386	0.3193	0.6522	0.7954	0.9703	0.8976	0.9383	0.9884	0.9819	0.9993	1	0.006418	1	0.9965	0.18831	0.0913	0.22545	0.26678	0.9952	1	1	1	0.9484
ISGS-4740	0	0	0	0	0	0.005286	0.07721	0.06917	0.09821	0.12222	0.16152	0.5498	0	0.002744	0.14126	0.2659	3.5e-05	1.1e-05	1	1	1	1	0.000219	0.001275	0.18354	0.014116	0.433	0.5177	0.8057	0.9133	0.9919	0.9525	0.9755	0.9972	0.994	0.9999	1	0.016053	1	0.9991	0.30367	0.16728	0.3164	0.3992	0.9986	1	1	1	0.9828
Beta-132589	0	0	0	0	0	0.003689	0.07845	0.06988	0.10031	0.12648	0.1689	0.5799	0	0.002654	0.14928	0.28122	3.3e-05	1e-05	1	1	1	1	0.000129	0.000851	0.19171	0.013159	0.465	0.5516	0.8344	0.9357	0.9955	0.9626	0.9823	0.9985	0.9961	0.9999	1	0.01608	1	0.9994	0.3205	0.17683	0.3303	0.4195	0.9992	1	1	1	0.9889
ISGS-4710	0	0	0	0	0	0.012234	0.11965	0.10876	0.15166	0.18339	0.23647	0.6457	0	0.004403	0.18444	0.3298	7.1e-05	2.2e-05	1	1	1	1	0.000587	0.002958	0.21926	0.023842	0.5384	0.6156	0.8619	0.9479	0.9962	0.9691	0.9855	0.9988	0.9968	0.9999	1	0.024738	1	0.9995	0.3692	0.21532	0.3663	0.4694	0.9993	1	1	1	0.9908
GS-4726	0	0	0	0	1e-06	0.05712	0.25264	0.23956	0.3092	0.3524	0.4264	0.8091	0	0.011333	0.2858	0.4641	0.000218	7e-05	1	1	1	1	0.003322	0.01456	0.29861	0.06992	0.7215	0.7762	0.9347	0.9832	0.9994	0.9873	0.9952	0.9998	0.9992	1	1	0.05521	1	0.9999	0.5032	0.3259	0.4661	0.6044	0.9999	1	1	1	0.9978
ISGS-4727	0	0	0	6e-06	9e-06	0.20574	0.4386	0.4322	0.4987	0.5313	0.5934	0.8538	0	0.03541	0.3961	0.5708	0.000928	0.000309	1	1	1	1	0.021776	0.06677	0.3867	0.19615	0.7925	0.8302	0.9447	0.9814	0.9986	0.988	0.9947	0.9995	0.9988	1	1	0.1185	1	0.9998	0.6044	0.4389	0.5494	0.6912	0.9998	1	1	1	0.9968
ISGS-4733	0	0	0	2e-06	5e-06	0.20077	0.4737	0.4665	0.5456	0.5828	0.654	0.9062	0	0.03229	0.4209	0.6092	0.000742	0.00026	1	1	1	1	0.016583	0.05859	0.4037	0.1941	0.8513	0.8818	0.9682	0.9931	0.9998	0.9941	0.998	0.9999	0.9997	1	1	0.11989	1	1	0.6423	0.4665	0.5761	0.7314	0.9999	1	1	1	0.9992
ISGS-4734	0	0	0	2e-06	7e-06	0.22928	0.4955	0.4898	0.5645	0.5988	0.6651	0.9027	0	0.03792	0.4343	0.6183	0.00092	0.000317	1	1	1	1	0.022003	0.07115	0.4157	0.21762	0.8506	0.88	0.9663	0.9917	0.9997	0.9935	0.9976	0.9999	0.9996	1	1	0.1309	1	1	0.6513	0.4792	0.5843	0.7372	0.9999	1	1	1	0.9989
Beta-134429	0	0	0	0	0	0.25272	0.6356	0.6348	0.7376	0.7721	0.8496	0.9828	0	0.03567	0.5091	0.7147	0.000688	0.000217	1	1	1	1	0.013043	0.0616	0.4664	0.24317	0.957	0.9663	0.993	0.9994	1	0.9988	0.9997	1	1	1	1	0.1499	1	1	0.7441	0.5593	0.6503	0.8271	1	1	1	1	1
ISGS-4729	0	0	0	4e-06	6e-06	0.30462	0.6246	0.6226	0.7049	0.7356	0.8016	0.9608	1e-06	0.04725	0.5109	0.7028	0.001103	0.000386	1	1	1	1	0.026229	0.09008	0.474	0.28253	0.9284	0.9438	0.9868	0.9981	1	0.9977	0.9994	1	0.9999	1	1	0.16458	1	1	0.7327	0.5596	0.6478	0.8124	1	1	1	1	0.9998
ISGS-4732	0	0	0	4e-06	4e-06	0.30375	0.6235	0.6218	0.7037	0.7347	0.8005	0.9606	0	0.04708	0.5103	0.7022	0.001118	0.000378	1	1	1	1	0.026037	0.08963	0.4733	0.28171	0.9278	0.9433	0.9865	0.998	1	0.9976	0.9994	1	0.9999	1	1	0.16422	1	1	0.732	0.5592	0.647	0.8116	1	1	1	1	0.9998
Beta-134428	0	0	0	2e-06	3e-06	0.4385	0.8195	0.8274	0.9063	0.9232	0.974	0.9993	0	0.06115	0.6143	0.8061	0.001356	0.000447	1	1	1	1	0.030498	0.11958	0.5519	0.3922	0.9969	0.997	0.9995	1	1	0.9999	1	1	1	1	1	0.21567	1	1	0.8316	0.6662	0.7263	0.8975	1	1	1	1	1
ISGS-4736	0	0	0	2.2e-05	2.7e-05	0.5347	0.8373	0.8417	0.9007	0.9152	0.9552	0.9949	3e-06	0.08991	0.6474	0.8211	0.002518	0.00092	1	1	1	1	0.06471	0.18676	0.5898	0.4754	0.9885	0.9906	0.998	0.9998	1	0.9996	0.9999	1	1	1	1	0.25827	1	1	0.845	0.6979	0.7479	0.9035	1	1	1	1	1
ISGS-4711	0	0	0	2.3e-05	3.6e-05	0.5446	0.8251	0.8284	0.883	0.898	0.9366	0.9896	3e-06	0.09785	0.646	0.8157	0.002845	0.001075	1	1	1	1	0.07506	0.20304	0.5929	0.4865	0.98	0.984	0.9963	0.9995	1	0.9993	0.9998	1	1	1	1	0.26561	1	1	0.8397	0.6963	0.7465	0.8976	1	1	1	1	1
Beta-184980	0	0	0	0	0	2.5e-05	0.000919	0.000729	0.001147	0.001772	0.003113	0.17868	0	8.9e-05	0.017974	0.05314	1e-06	0	1	1	1	1	0	4e-06	0.06098	0.000193	0.04958	0.10501	0.4311	0.5948	0.9168	0.8015	0.8668	0.9631	0.955	0.9973	0.9999	0.00029	1	0.99	0.07474	0.024621	0.12939	0.12657	0.9867	1	1	1	0.8768
Beta-184982	0	0	0	0	0	0.004338	0.03772	0.03426	0.04741	0.05829	0.07695	0.357	0	0.001552	0.07715	0.15599	2.7e-05	8e-06	1	1	1	1	0.000234	0.001095	0.12094	0.00801	0.23334	0.30593	0.622	0.7614	0.9574	0.8802	0.924	0.9818	0.9759	0.9987	1	0.008326	1	0.9949	0.18562	0.09337	0.22102	0.26017	0.9932	1	1	1	0.9332
Beta-184984	0	0	0	0	0	5.9e-05	0.002674	0.002162	0.00328	0.005065	0.008282	0.22423	0	0.000179	0.028509	0.0759	2e-06	0	1	1	1	1	1e-06	1.8e-05	0.07623	0.000521	0.08964	0.1599	0.5142	0.6831	0.9491	0.8461	0.9026	0.9802	0.9704	0.9989	1	0.000808	1	0.9942	0.10146	0.03753	0.15522	0.16365	0.9919	1	1	1	0.915
Beta-184979	0	0	0	0	0	0.004003	0.06563	0.05845	0.08348	0.10474	0.13967	0.5162	0	0.002321	0.12769	0.24514	3.2e-05	7e-06	1	1	1	1	0.000149	0.00095	0.1718	0.011603	0.3977	0.483	0.7835	0.8985	0.9898	0.9456	0.9711	0.9965	0.9927	0.9998	1	0.013537	1	0.9988	0.28207	0.15205	0.3003	0.3752	0.9983	1	1	1	0.9791
Beta-184981	0	0	0	0	0	0.009441	0.10467	0.09447	0.13227	0.1622	0.21037	0.6151	0	0.003765	0.16961	0.3089	5.3e-05	1.5e-05	1	1	1	1	0.000442	0.002273	0.20748	0.02008	0.5045	0.5839	0.8448	0.9378	0.995	0.9643	0.9827	0.9984	0.996	0.9999	1	0.021475	1	0.9994	0.3472	0.19908	0.3496	0.4466	0.9991	1	1	1	0.9886
Beta-184977	0	0	0	4e-06	7e-06	0.30403	0.6235	0.6218	0.7036	0.7346	0.8006	0.9603	1e-06	0.04712	0.5104	0.7019	0.001098	0.000384	1	1	1	1	0.026041	0.08971	0.4736	0.28193	0.9283	0.9434	0.9866	0.9981	1	0.9977	0.9994	1	0.9999	1	1	0.16397	1	1	0.7319	0.5588	0.6474	0.8116	1	1	1	1	0.9998
Beta-184983	0	0	0	1.6e-05	2.1e-05	0.4528	0.7586	0.7609	0.8273	0.8482	0.8973	0.9815	0	0.07597	0.5978	0.7774	0.002024	0.000741	1	1	1	1	0.05264	0.15409	0.5484	0.4073	0.9654	0.9725	0.9937	0.9991	1	0.9989	0.9997	1	1	1	1	0.22523	1	1	0.8032	0.6474	0.7114	0.8696	1	1	1	1	0.9999
Beta-184985	0	0	0	1.4e-05	2.9e-05	0.5348	0.8379	0.8422	0.9012	0.9156	0.9553	0.995	1e-06	0.0902	0.647	0.8213	0.002508	0.00091	1	1	1	1	0.0647	0.18619	0.59	0.4759	0.9884	0.9906	0.998	0.9998	1	0.9997	0.9999	1	1	1	1	0.25876	1	1	0.8452	0.6977	0.7476	0.9039	1	1	1	1	1
Beta-184973	0	0	0	4.2e-05	6.3e-05	0.7209	0.9353	0.9398	0.9681	0.9735	0.9918	0.9998	4e-06	0.14057	0.7331	0.88	0.004466	0.001649	1	1	1	1	0.1199	0.29931	0.6743	0.6378	0.9993	0.9992	0.9999	1	1	1	1	1	1	1	1	0.3419	1	1	0.9005	0.7824	0.8077	0.943	1	1	1	1	1
End Caral	0	0	0	0	0	0	0	0	0	4e-06	1.5e-05	0.10116	0	8e-06	0.004586	0.01754	0	0	1	1	1	1	0	0	0.0321	1e-06	0.006598	0.025412	0.21694	0.3262	0.7663	0.6448	0.7288	0.8725	0.8852	0.9832	0.9984	4e-06	1	0.9664	0.029434	0.007149	0.07642	0.05761	0.9596	1	1	1	0.7226
Start Kotosh	0	0.011506	0.019598	0.05222	0.05941	0.3602	0.4926	0.4887	0.5258	0.5459	0.583	0.7919	0.016563	0.1819	0.4678	0.5885	0.05216	0.04275	1	1	1	1	0.18367	0.25354	0.4704	0.3504	0.7335	0.7697	0.8963	0.9432	0.9886	0.9688	0.981	0.9945	0.9937	0.9993	0.9999	0.25591	1	0.9984	0.6144	0.5	0.5856	0.6799	0.998	1	1	1	0.9834
TK-109	0	0	0	0	0	4.6e-05	0.000519	0.000425	0.000628	0.000826	0.001164	0.0408	0	2.7e-05	0.002256	0.006035	1e-06	0	1	1	1	1	3e-06	1e-05	0.009196	0.000118	0.006292	0.010989	0.04899	0.06831	0.17808	0.19038	0.2214	0.24232	0.3299	0.4418	0.6531	0.00011	0.9921	0.4855	0.008937	0.003031	0.023944	0.015872	0.4851	0.9999	0.9275	0.9718	0.19921
TK-110	0	0	0	0	0	0	1e-06	0	1e-06	2e-06	5e-06	0.03176	0	0	0.00029	0.001302	0	0	1	1	1	1	0	0	0.005006	0	0.000385	0.001369	0.018222	0.026828	0.12637	0.16398	0.19757	0.20782	0.3373	0.4914	0.7654	0	0.9999	0.5501	0.002674	0.000523	0.016863	0.006143	0.5487	1	0.9895	0.9988	0.16583
GaK-766a	0	0	0	0	0	7.7e-05	0.0019	0.001654	0.002439	0.003294	0.004809	0.11053	0	0.000101	0.010571	0.027909	1e-06	0	1	1	1	1	1e-06	1.9e-05	0.03346	0.00035	0.031023	0.05399	0.20509	0.28253	0.5693	0.5229	0.5869	0.6732	0.7415	0.8682	0.9582	0.000443	1	0.8689	0.03897	0.014036	0.07461	0.06541	0.8631	1	0.9992	0.9999	0.5676
GaK-766b	0	0	0	4e-06	7e-06	0.04027	0.13294	0.12672	0.15902	0.18117	0.2197	0.5485	2e-06	0.009223	0.17039	0.28943	0.000252	9.7e-05	1	1	1	1	0.005351	0.014141	0.20123	0.04516	0.4435	0.5101	0.7545	0.8502	0.9651	0.9197	0.9479	0.9825	0.9813	0.9977	0.9998	0.03328	1	0.9951	0.3228	0.19618	0.3281	0.4082	0.9939	1	1	1	0.9523
TK-42	0	0.000462	0.000982	0.004562	0.005497	0.06696	0.1047	0.10296	0.11433	0.12146	0.13449	0.2743	0.000858	0.028402	0.11003	0.15793	0.004825	0.003566	0.9993	0.9998	0.9998	1	0.028012	0.04264	0.12593	0.06554	0.20953	0.23778	0.3677	0.425	0.5738	0.5495	0.5856	0.6264	0.6709	0.7439	0.8369	0.04597	0.9803	0.7576	0.17299	0.12128	0.18549	0.21005	0.7557	0.9966	0.9428	0.9637	0.5752
End Kotosh	0	0	0	0	0	0	0	0	0	0	0	0.010878	0	0	2.9e-05	0.000132	0	0	0.9771	0.9874	0.9866	0.9955	0	0	0.000836	0	3e-05	0.000123	0.002102	0.003029	0.018296	0.029777	0.03622	0.03359	0.0703	0.11082	0.26909	0	0.8043	0.14983	0.000338	5.3e-05	0.003652	0.000887	0.15328	0.9367	0.5896	0.697	0.028325
Start La Galgada	0	0.002445	0.005171	0.026728	0.03349	0.8681	0.9744	0.9761	0.9875	0.9896	0.997	1	0.004881	0.3463	0.8396	0.9322	0.03797	0.024935	1	1	1	1	0.3631	0.5816	0.8076	0.8161	0.9998	0.9998	1	1	1	1	1	1	1	1	1	0.5271	1	1	0.9473	0.8793	0.8849	0.9708	1	1	1	1	1
TX4450	0	0	0	0	0	0.024508	0.11991	0.11243	0.14728	0.17248	0.21454	0.556	0	0.005788	0.16399	0.28668	0.000116	3.8e-05	1	1	1	1	0.001978	0.007037	0.19659	0.03216	0.4489	0.5172	0.7655	0.8615	0.9695	0.9254	0.9524	0.9844	0.983	0.9978	0.9997	0.026838	1	0.9955	0.3209	0.19025	0.3265	0.409	0.9945	1	1	1	0.9575
TX3167	0	0	0	0	0	0.003542	0.07682	0.06801	0.09815	0.12382	0.16566	0.5709	0	0.002614	0.14602	0.27582	2.7e-05	1e-05	1	1	1	1	0.000135	0.000831	0.18887	0.012757	0.4566	0.5419	0.8239	0.9259	0.9932	0.9581	0.9791	0.9977	0.9949	0.9999	1	0.01581	1	0.9992	0.31495	0.17353	0.3255	0.4128	0.9988	1	1	1	0.9854
TK4449	0	0	0	0	0	0.002626	0.05125	0.04519	0.06542	0.08241	0.11127	0.4584	0	0.0018	0.1073	0.21087	1.9e-05	6e-06	1	1	1	1	0.000105	0.000602	0.15243	0.00877	0.3384	0.421	0.726	0.8482	0.9762	0.9211	0.9528	0.99	0.9859	0.9993	1	0.010698	1	0.9971	0.24556	0.12887	0.27022	0.3327	0.9961	1	1	1	0.9608
TK4448	0	0	0	0	0	2e-06	0.000144	0.000119	0.000177	0.000324	0.000635	0.11276	0	2.7e-05	0.007289	0.023919	0	0	1	1	1	1	0	0	0.03555	4.2e-05	0.017427	0.04262	0.23759	0.3424	0.7207	0.6293	0.7061	0.8285	0.8614	0.9687	0.9953	6e-05	1	0.9522	0.03678	0.010646	0.08172	0.06703	0.9454	1	1	1	0.6945
UGa4583	0	0	0	0	0	3e-06	9.7e-05	7.6e-05	0.000117	0.000199	0.000324	0.07197	0	1.2e-05	0.003192	0.010833	0	0	1	1	1	1	0	1e-06	0.019565	2.2e-05	0.007116	0.017951	0.11662	0.16948	0.4494	0.4251	0.4899	0.5729	0.6695	0.827	0.9487	3.4e-05	1	0.8311	0.017433	0.004714	0.04904	0.03356	0.8238	1	0.9993	1	0.461
TX-2463	0	0	0	0	0	0	5e-06	5e-06	6e-06	1.3e-05	1.9e-05	0.028629	0	0	0.000322	0.001335	0	0	1	1	1	1	0	0	0.004375	0	0.000588	0.001703	0.017156	0.024877	0.10562	0.13655	0.16364	0.17032	0.28041	0.4105	0.685	3e-06	0.9996	0.4742	0.002523	0.000568	0.014708	0.00568	0.4743	1	0.9774	0.9967	0.1378
TX-2464	0	0	0	0	0	0	0	0	0	0	0	0.021751	0	0	7.1e-05	0.000347	0	0	1	1	1	1	0	0	0.002189	0	7.1e-05	0.000287	0.005496	0.007714	0.05096	0.08368	0.10192	0.0964	0.19485	0.30462	0.599	0	0.9995	0.3788	0.000865	0.000155	0.009373	0.002279	0.3824	1	0.9682	0.9954	0.08055
TX-3166	0	0	0	0	0	9e-05	0.002588	0.002216	0.00325	0.004488	0.006723	0.14467	0	0.000116	0.01551	0.04104	1e-06	0	1	1	1	1	3e-06	1.8e-05	0.04636	0.000452	0.04645	0.08112	0.29303	0.4006	0.7267	0.6472	0.7163	0.8191	0.8542	0.9517	0.9891	0.000623	1	0.9413	0.05632	0.020602	0.09912	0.09264	0.9356	1	0.9999	1	0.7066
TX-3663	0	0	0	0	0	0	0	0	0	0	0	0.03889	0	0	0.000241	0.001315	0	0	1	1	1	1	0	0	0.006615	0	0.000166	0.000879	0.021971	0.03246	0.18867	0.23345	0.28234	0.3113	0.4723	0.6722	0.9044	0	1	0.7048	0.003035	0.000511	0.022285	0.007641	0.6976	1	0.9992	1	0.2391
TX-3664	0	0	0	0.00011	0.000203	0.7038	0.9238	0.9283	0.9627	0.9691	0.9909	0.9999	2.1e-05	0.16639	0.7361	0.879	0.006203	0.002447	1	1	1	1	0.15356	0.3339	0.6841	0.6371	0.9994	0.9993	0.9999	1	1	1	1	1	1	1	1	0.3588	1	1	0.8994	0.785	0.8109	0.9415	1	1	1	1	1
TX-4446	0	0	0	0	0	0	0	0	0	0	0	0.004794	0	0	0	0	0	0	1	1	1	1	0	0	1.4e-05	0	0	0	4e-06	4e-06	8.9e-05	0.000539	0.000601	0.000264	0.001969	0.003705	0.0632	0	0.89	0.01098	1e-06	0	0.000262	7e-06	0.012492	0.9996	0.3553	0.633	0.000359
TX-4447	0	0	0	0	0	3.7e-05	0.001497	0.001233	0.001896	0.002783	0.004237	0.1454	0	8.9e-05	0.014214	0.03982	0	0	1	1	1	1	1e-06	1e-05	0.04719	0.00028	0.0417	0.07815	0.30932	0.4272	0.7739	0.6808	0.752	0.8621	0.8849	0.9729	0.9954	0.000401	1	0.9603	0.05574	0.01924	0.10174	0.09475	0.9545	1	1	1	0.7461
TX-5606	0	0	0	4e-06	6e-06	0.006435	0.017248	0.016496	0.020185	0.022562	0.02684	0.09014	0	0.001513	0.021712	0.03751	5.8e-05	2.2e-05	0.9999	1	1	1	0.001098	0.002569	0.030182	0.006818	0.05341	0.06452	0.12216	0.14875	0.23726	0.23452	0.25787	0.27779	0.3277	0.3968	0.5499	0.00469	0.9682	0.4282	0.04327	0.025089	0.05441	0.05786	0.429	0.9992	0.8266	0.9099	0.24618
End La Galgada	0	0	0	0	0	0	0	0	0	0	0	0.003165	0	0	0	0	0	0	0.9946	0.9983	0.9981	0.9995	0	0	4e-06	0	0	0	1e-06	0	1.2e-05	0.000111	0.000135	3.3e-05	0.000442	0.0009	0.031072	0	0.6651	0.003421	0	0	0.000105	1e-06	0.004024	0.9689	0.16822	0.3626	6.5e-05
Start Pampa de las Llamas	0	0.11105	0.22056	0.6116	0.6882	1	1	1	1	1	1	1	0.17775	0.9595	0.9999	1	0.5565	0.4797	1	1	1	1	0.9735	0.9997	0.9986	1	1	1	1	1	1	1	1	1	1	1	1	0.9582	1	1	1	0.9999	0.9985	1	1	1	1	1	1
UGa-4510	0	0.03757	0.1047	0.4617	0.5508	1	1	1	1	1	1	1	0.08741	0.936	0.9998	1	0.42	0.3421	1	1	1	1	0.9566	0.9992	0.9974	1	1	1	1	1	1	1	1	1	1	1	1	0.9388	1	1	1	0.9998	0.9974	1	1	1	1	1	1
UGa-5796	0	0	0	0	0	0.002171	0.030376	0.027064	0.0386	0.04857	0.0654	0.3318	0	0.001157	0.06896	0.1411	1.7e-05	3e-06	1	1	1	1	0.000125	0.00058	0.11056	0.005632	0.21469	0.28184	0.5721	0.7001	0.9165	0.8413	0.8883	0.9546	0.9559	0.9929	0.9989	0.00662	1	0.9872	0.1689	0.08363	0.20444	0.23782	0.9845	1	1	1	0.8939
UGa-4505	0	0	0	0	0	0.000691	0.017183	0.014929	0.02192	0.028556	0.03974	0.28599	0	0.000688	0.05169	0.11311	8e-06	3e-06	1	1	1	1	2e-05	0.000168	0.09484	0.002929	0.16583	0.23205	0.5351	0.6726	0.9147	0.8301	0.8822	0.9559	0.9556	0.9944	0.9994	0.003724	1	0.988	0.1397	0.0641	0.18151	0.20453	0.9852	1	1	1	0.8883
UGa-5461	0	0	0	0	0	0	1e-06	1e-06	1e-06	3e-06	2e-06	0.03683	0	1e-06	0.000396	0.001737	0	0	1	1	1	1	0	0	0.00644	0	0.000539	0.002009	0.025808	0.0382	0.17108	0.20726	0.24775	0.2698	0.4095	0.5819	0.8374	0	1	0.6303	0.003647	0.000719	0.020875	0.008401	0.6264	1	0.9962	0.9997	0.21244
UGa-5462	0	0	0	0	0	0	1e-06	0	1e-06	2e-06	4e-06	0.03553	0	1e-06	0.000342	0.001553	0	0	1	1	1	1	0	0	0.005929	0	0.000467	0.001722	0.022872	0.0335	0.15736	0.19481	0.23453	0.25204	0.3925	0.5628	0.8255	0	1	0.6143	0.003205	0.000623	0.019777	0.007545	0.6111	1	0.9957	0.9996	0.19916
UGa-5801	0	0	0	0	0	0	6e-06	5e-06	6e-06	9e-06	2.4e-05	0.03357	0	1e-06	0.000468	0.001868	0	0	1	1	1	1	0	0	0.005783	0	0.000808	0.002473	0.024175	0.03554	0.14268	0.1736	0.20737	0.22143	0.3432	0.4904	0.7552	2e-06	0.9998	0.5472	0.003544	0.000793	0.018462	0.007777	0.5458	1	0.9872	0.9984	0.1775
UGa-4506	0	0	0	0	0	0	0	0	1e-06	2e-06	5e-06	0.03021	0	0	0.000221	0.001009	0	0	1	1	1	1	0	0	0.004372	0	0.00029	0.001062	0.015135	0.02183	0.11118	0.1504	0.18161	0.1874	0.317	0.468	0.7536	1e-06	0.9999	0.5323	0.002205	0.000429	0.015587	0.005254	0.5311	1	0.99	0.9989	0.15079
UGa-5799	0	0	0	0	0	0	0	0	0	0	0	0.023179	0	0	2.6e-05	0.000174	0	0	1	1	1	1	0	0	0.00217	0	3e-06	3.1e-05	0.002985	0.00361	0.04385	0.09179	0.11241	0.09885	0.22784	0.3671	0.7029	0	0.9999	0.4536	0.000607	6.6e-05	0.010238	0.001868	0.4552	1	0.9911	0.9993	0.08546
UGa-4508	0	0	0	0	0	0	0	0	0	0	0	0.019047	0	0	2.8e-05	0.000189	0	0	1	1	1	1	0	0	0.001563	0	1.6e-05	9.3e-05	0.002839	0.003789	0.03254	0.06287	0.07661	0.06823	0.15481	0.24904	0.5438	0	0.9993	0.3267	0.000485	6.2e-05	0.007373	0.001403	0.3317	1	0.9599	0.994	0.05906
UGa-4507	0	0	0	0	0	5.3e-05	0.000492	0.000446	0.000641	0.000797	0.001082	0.029147	0	2.2e-05	0.001706	0.004136	0	0	1	1	1	1	4e-06	1.4e-05	0.005831	0.0001	0.004672	0.007616	0.03003	0.04136	0.10641	0.11827	0.13735	0.14723	0.2114	0.2909	0.4961	0.000109	0.9856	0.3369	0.005802	0.00218	0.015493	0.01022	0.3393	1	0.8597	0.9435	0.12267
UGa-5800	0	0	0	0	0	0	0	0	0	0	0	0.010106	0	0	1e-06	4e-06	0	0	1	1	1	1	0	0	0.000162	0	0	0	8.5e-05	7.2e-05	0.001619	0.00713	0.008478	0.004501	0.023966	0.04468	0.24933	0	0.9976	0.09679	3.1e-05	0	0.00187	0.000116	0.10488	1	0.8721	0.9778	0.005309
UGa-4509	0	0	0	0	0	0	0	0	0	0	0	0.010255	0	0	2e-06	1.7e-05	0	0	1	1	1	1	0	0	0.000293	0	1e-06	7e-06	0.000331	0.000397	0.004974	0.013236	0.015931	0.011896	0.03714	0.06443	0.25071	0	0.9906	0.10965	8.3e-05	7e-06	0.002238	0.000246	0.11575	1	0.7991	0.9416	0.011321
UGa-5611	0	0	0	0	0	0	0	0	0	0	0	0.008906	0	0	0	4e-06	0	0	1	1	1	1	0	0	0.000142	0	0	0	7.6e-05	7.2e-05	0.001574	0.005826	0.006837	0.004068	0.018684	0.03406	0.19971	0	0.9922	0.07246	2.8e-05	1e-06	0.001425	9.8e-05	0.07851	1	0.7845	0.9437	0.004502
UGa-5610	0	0	0	0	0	0	0	0	0	0	0	0.006476	0	0	0	0	0	0	1	1	1	1	0	0	1.3e-05	0	0	0	1e-06	1e-06	1.9e-05	0.000464	0.000488	7e-05	0.002305	0.004208	0.10502	0	0.987	0.01908	3e-06	0	0.000501	9e-06	0.022825	1	0.6603	0.9028	0.000215
UGa-5795	0	0	0	0	0	0	0	0	0	0	0	0.005739	0	0	0	0	0	0	1	1	1	1	0	0	9e-06	0	0	0	1e-06	0	9e-06	0.00027	0.000281	3.9e-05	0.001395	0.0025	0.08323	0	0.9751	0.012114	1e-06	0	0.000333	3e-06	0.014573	1	0.5534	0.8405	0.00013
UGa-5609	0	0	0	0	0	0	0	0	0	0	0	0.005371	0	0	0	0	0	0	1	1	1	1	0	0	8e-06	0	0	0	1e-06	0	1.3e-05	0.000247	0.000254	5e-05	0.001172	0.002143	0.07385	0	0.9631	0.009962	1e-06	0	0.000283	3e-06	0.011971	1	0.4929	0.795	0.00011
UGa-5797	0	0	0	0	0	0	0	0	0	0	0	0.005129	0	0	0	0	0	0	1	1	1	1	0	0	5e-06	0	0	0	1e-06	0	1.2e-05	0.000159	0.000177	2.9e-05	0.000821	0.001464	0.06569	0	0.9544	0.007491	0	0	0.000227	4e-06	0.009256	1	0.4494	0.7628	7.6e-05
UGa-5630	0	0	0	0	0	0	0	0	0	0	0	0.004348	0	0	0	0	0	0	1	1	1	1	0	0	2e-06	0	0	0	0	0	1e-06	5e-05	4.9e-05	4e-06	0.000281	0.000467	0.04668	0	0.918	0.002879	0	0	0.00012	1e-06	0.003655	0.9999	0.3242	0.6542	1.5e-05
UGa-5794	0	0	0	0	0	0	0	0	0	0	0	0.004277	0	0	0	0	0	0	1	1	1	1	0	0	1e-06	0	0	0	0	0	2e-06	3.5e-05	3.7e-05	3e-06	0.000214	0.000373	0.04418	0	0.9103	0.002432	0	0	0.000112	0	0.003183	0.9999	0.30599	0.6351	1.1e-05
UGa-4511	0	0	0	0	0	0	0	0	0	0	0	0.004544	0	0	0	0	0	0	1	1	1	1	0	0	1.4e-05	0	0	0	5e-06	5e-06	0.00012	0.00054	0.000628	0.000308	0.001861	0.003478	0.05776	0	0.8699	0.00964	3e-06	0	0.000251	1.2e-05	0.010959	0.9996	0.3245	0.5965	0.000394
UGa-4503	0	0	0	0	0	0	0	0	0	0	0	0.00402	0	0	0	0	0	0	1	1	1	1	0	0	3e-06	0	0	0	1e-06	0	8e-06	9e-05	9.1e-05	2.4e-05	0.000426	0.000747	0.04157	0	0.8611	0.003348	0	0	0.000118	1e-06	0.004014	0.9997	0.26107	0.5534	5e-05
UGa-5798	0	0	0	0	0	0	0	0	0	0	0	0.00404	0	0	0	0	0	0	1	1	1	1	0	0	5e-06	0	0	0	2e-06	1e-06	4e-05	0.000219	0.000235	9.1e-05	0.000854	0.001506	0.04513	0	0.8481	0.005126	0	0	0.000141	2e-06	0.00609	0.9995	0.26703	0.5433	0.00014
UGa-5873	0	0	0	0	0	0	0	0	0	0	0	0.002787	0	0	0	0	0	0	0.9999	1	1	1	0	0	0	0	0	0	0	0	0	0	0	0	0	0	0.01786	0	0.746	6e-06	0	0	1.2e-05	0	1.5e-05	0.9996	0.05726	0.29244	0
UGa-4504	0	0	0	0	0	0	0	0	0	0	0	0.002837	0	0	0	0	0	0	0.9998	1	1	1	0	0	0	0	0	0	0	0	0	7e-06	8e-06	2e-06	4.1e-05	6.8e-05	0.020562	0	0.7087	0.00043	0	0	2.8e-05	0	0.000534	0.998	0.09524	0.31207	9e-06
End Pampa de las Llamas	0	0	0	0	0	0	0	0	0	0	0	0.001633	0	0	0	0	0	0	0.9962	0.9994	0.9993	0.9999	0	0	0	0	0	0	0	0	0	0	0	0	0	0	0.007034	0	0.3786	0	0	0	1e-06	0	1e-06	0.962	0.008857	0.0668	0
Start Buena Vista	0	0.000489	0.000891	0.003041	0.003626	0.06729	0.13859	0.13382	0.15676	0.17383	0.20311	0.5114	0.000782	0.02405	0.17092	0.27733	0.003517	0.002567	1	1	1	1	0.021874	0.0369	0.20555	0.06875	0.4032	0.4752	0.7462	0.8571	0.9778	0.9266	0.956	0.9909	0.9872	0.9994	1	0.04855	1	0.9975	0.31014	0.19461	0.3236	0.3914	0.9964	1	1	1	0.9634
PI-1845	0	0	0	0	0	0	0	0	0	0	0	0.018401	0	0	1e-05	8.2e-05	0	0	1	1	1	1	0	0	0.001251	0	1e-06	1.9e-05	0.00137	0.001584	0.022675	0.05402	0.06639	0.05361	0.14204	0.23757	0.5558	0	0.9996	0.3253	0.00031	3.6e-05	0.006804	0.001016	0.3307	1	0.9733	0.9967	0.04885
UGAMS- 3129	0	0	0	0	0	0	0	0	0	0	0	0.016992	0	0	2e-06	3.3e-05	0	0	1	1	1	1	0	0	0.000789	0	0	0	0.000509	0.000445	0.010393	0.03483	0.04219	0.027687	0.10284	0.18455	0.5349	0	0.9999	0.291	0.000162	1.3e-05	0.005543	0.000605	0.29973	1	0.9884	0.9993	0.028987
UGAMS- 3127	0	0	0	0	0	0	0	0	0	0	0	0.021922	0	0	6e-06	7e-05	0	0	1	1	1	1	0	0	0.001647	0	0	1e-06	0.001257	0.001135	0.026494	0.07457	0.09144	0.07031	0.19867	0.3351	0.7051	0	1	0.4372	0.000362	3.4e-05	0.008935	0.001312	0.44	1	0.9958	0.9998	0.06596
UGAMS- 3128	0	0	0	0	0	0	0	0	0	0	0	0.029656	0	0	2.7e-05	0.000218	0	0	1	1	1	1	0	0	0.003361	0	0	1.1e-05	0.004088	0.004632	0.07229	0.14713	0.18143	0.16717	0.3542	0.5573	0.8796	0	1	0.623	0.000893	9.5e-05	0.014558	0.00284	0.6177	1	0.9993	1	0.13902
GX-30695	0	0	0	0	0	0	0	0	1e-06	1e-06	5e-06	0.06634	0	2e-06	0.001504	0.006586	0	0	1	1	1	1	0	0	0.016982	0	0.001912	0.007864	0.09208	0.13896	0.4809	0.4473	0.5243	0.6357	0.7314	0.9065	0.982	3e-06	1	0.888	0.012143	0.002638	0.04524	0.025941	0.8778	1	0.9999	1	0.489
GX-31276	0	0	0	0	0	0.000317	0.007076	0.006025	0.008819	0.012442	0.018434	0.22482	0	0.000328	0.03311	0.07937	3e-06	1e-06	1	1	1	1	1.2e-05	7.9e-05	0.07451	0.001319	0.10664	0.16423	0.4552	0.5939	0.8868	0.79	0.8506	0.9412	0.9422	0.9928	0.9993	0.001744	1	0.9841	0.10212	0.04231	0.14889	0.15787	0.9804	1	1	1	0.855
GX-32177	0	0	0	0	0	0.000476	0.010035	0.008591	0.012484	0.01716	0.024843	0.24851	0	0.000467	0.03969	0.09192	7e-06	2e-06	1	1	1	1	2.2e-05	0.00012	0.08235	0.001848	0.12829	0.19022	0.4899	0.6294	0.904	0.8106	0.8671	0.9519	0.9505	0.9947	0.9995	0.002379	1	0.9871	0.1165	0.05006	0.16171	0.17608	0.9839	1	1	1	0.8733
End Buena Vista	0	0	0	0	0	0	0	0	0	0	0	0.009387	0	0	0	4e-06	0	0	0.9982	0.9992	0.9991	0.9997	0	0	0.000117	0	0	0	3.5e-05	3.6e-05	0.000792	0.00538	0.006104	0.002353	0.019758	0.03838	0.23197	0	0.9504	0.09053	1.7e-05	1e-06	0.001743	8.3e-05	0.09767	0.993	0.7728	0.8864	0.003638
Start El Paraiso	0	5.5e-05	0.000102	0.000346	0.000408	0.007464	0.014879	0.01428	0.016954	0.018767	0.022196	0.12712	8.9e-05	0.002729	0.022369	0.04218	0.0004	0.000296	1	1	1	1	0.002489	0.004115	0.04223	0.007589	0.05356	0.0734	0.20098	0.26504	0.5365	0.5085	0.5735	0.6528	0.7418	0.8887	0.9784	0.005304	1	0.8829	0.05265	0.026711	0.08406	0.07775	0.8756	1	0.9999	1	0.5465
Beta-8704	0	0	0	0	0	0	0	0	0	0	0	0.002355	0	0	0	0	0	0	0.9997	1	1	1	0	0	0	0	0	0	0	0	0	0	0	0	0	0	0.013276	0	0.6059	4e-06	0	0	8e-06	0	1.1e-05	0.9957	0.03563	0.19347	0
P-1209	0	0	0	0	0	0	0	0	0	0	0	0.002623	0	0	0	0	0	0	0.9998	1	1	1	0	0	0	0	0	0	0	0	0	0	1e-06	0	0	2e-06	0.016164	0	0.6757	2.5e-05	0	0	1.3e-05	0	4.1e-05	0.9982	0.05625	0.2519	0
JQ02	0	0	0	0	0	0	0	0	0	0	0	0.015216	0	0	1e-06	1.3e-05	0	0	1	1	1	1	0	0	0.000482	0	0	0	0.000215	0.000185	0.004401	0.020748	0.024504	0.012282	0.06836	0.12949	0.4742	0	0.9999	0.23832	8.3e-05	9e-06	0.004206	0.00032	0.2491	1	0.9857	0.9991	0.015479
P-1210	0	0	0	0	0	0	0	0	0	0	0	0.011796	0	0	1e-06	1e-05	0	0	1	1	1	1	0	0	0.000312	0	0	0	0.000186	0.000175	0.00379	0.013484	0.016171	0.010111	0.04167	0.07524	0.31445	0	0.9984	0.14037	6e-05	5e-06	0.002709	0.000223	0.14839	1	0.9058	0.9848	0.010844
P-1214	0	0	0	0	0	0	0	0	0	0	0	0.019532	0	0	9e-06	7.6e-05	0	0	1	1	1	1	0	0	0.001384	0	0	6e-06	0.001438	0.001563	0.024822	0.06104	0.07462	0.06038	0.15969	0.26631	0.5989	0	0.9998	0.3576	0.000362	3.6e-05	0.00747	0.001104	0.3626	1	0.9809	0.998	0.05496
JQ10	0	0	0	0	0	0	0	0	0	0	0	0.021694	0	0	6e-06	7e-05	0	0	1	1	1	1	0	0	0.001622	0	0	1e-06	0.001128	0.001062	0.024085	0.07077	0.08671	0.06506	0.19107	0.3256	0.7033	0	1	0.4316	0.000344	2.9e-05	0.008749	0.001212	0.4357	1	0.9963	0.9998	0.06229
I-13276	0	0	0	0	0	0	9e-06	1e-05	1.3e-05	1.8e-05	3.9e-05	0.03481	0	2e-06	0.000515	0.001963	0	0	1	1	1	1	0	0	0.006102	4e-06	0.000899	0.002653	0.025919	0.03795	0.15427	0.18505	0.22078	0.2387	0.3641	0.5175	0.7831	3e-06	0.9999	0.5741	0.003798	0.000844	0.019446	0.008222	0.5721	1	0.9905	0.9988	0.18998
I-13275	0	0	0	0	0	0	1e-05	1e-05	1.3e-05	1.8e-05	2.9e-05	0.03349	0	1e-06	0.000438	0.001749	0	0	1	1	1	1	0	0	0.00568	2e-06	0.000744	0.002195	0.022909	0.03368	0.14247	0.17451	0.20863	0.22349	0.3475	0.4983	0.7684	2e-06	0.9998	0.557	0.003329	0.000738	0.018272	0.007396	0.5551	1	0.9888	0.9985	0.17816
I-1676	0	0	0	0	0	1.8e-05	0.000172	0.000143	0.000222	0.000298	0.00042	0.03445	0	8e-06	0.001109	0.003237	0	0	1	1	1	1	1e-06	4e-06	0.006645	3.6e-05	0.002805	0.005329	0.03163	0.04497	0.14748	0.16914	0.19951	0.21559	0.3176	0.4438	0.6915	4.6e-05	0.9986	0.499	0.005265	0.001542	0.01925	0.010168	0.4985	1	0.9645	0.9913	0.1746
End El Paraiso	0	0	0	0	0	0	0	0	0	0	0	0.001584	0	0	0	0	0	0	0.9898	0.997	0.9967	0.9992	0	0	0	0	0	0	0	0	0	0	0	0	0	0	0.006808	0	0.3522	0	0	0	2e-06	0	0	0.9328	0.009773	0.06744	0
Start Bahia Seca	0	0.000218	0.000371	0.000938	0.001042	0.005504	0.007645	0.007554	0.008157	0.008555	0.009228	0.03028	0.000295	0.002955	0.007947	0.011074	0.000919	0.00075	1	1	1	1	0.002955	0.004019	0.009779	0.005427	0.013676	0.01573	0.02736	0.03269	0.05781	0.06443	0.07203	0.07333	0.10737	0.14758	0.3514	0.004019	0.9979	0.19751	0.012206	0.008634	0.016489	0.0151	0.20313	1	0.8886	0.9805	0.06522
UGa-6129	0	0	0	0	0	0	0	0	0	0	0	0.007792	0	0	0	2e-06	0	0	1	1	1	1	0	0	5.1e-05	0	0	0	1.7e-05	1.8e-05	0.000346	0.002035	0.002352	0.000928	0.007664	0.014658	0.1527	0	0.9944	0.04233	7e-06	1e-06	0.000894	3.3e-05	0.04748	1	0.7682	0.9511	0.001331
UGa-6023	0	0	0	0	0	0	0	0	0	0	0	0.006334	0	0	0	0	0	0	1	1	1	1	0	0	1.3e-05	0	0	0	1e-06	0	8e-06	0.000319	0.000311	3.5e-05	0.00166	0.002952	0.0975	0	0.9879	0.015447	0	0	0.000423	3e-06	0.018645	1	0.6523	0.9058	0.000136
UGa-6025	0	0	0	0	0	0	0	0	0	0	0	0.005598	0	0	0	0	0	0	1	1	1	1	0	0	7e-06	0	0	0	0	0	4e-06	0.000155	0.000132	1.2e-05	0.000768	0.001394	0.07606	0	0.9771	0.008714	0	0	0.00028	3e-06	0.010635	1	0.5467	0.8459	5.8e-05
UGa-6022	0	0	0	0	0	0	0	0	0	0	0	0.004378	0	0	0	0	0	0	1	1	1	1	0	0	1e-06	0	0	0	0	0	0	1.7e-05	1.2e-05	0	0.000104	0.000157	0.0451	0	0.9311	0.001556	0	0	0.000101	0	0.00209	0.9999	0.3356	0.6805	4e-06
End Bahia Seca	0	0	0	0	0	0	0	0	0	0	0	0.003243	0	0	0	0	0	0	0.9916	0.996	0.9957	0.9986	0	0	0	0	0	0	0	0	0	4e-06	4e-06	0	2.7e-05	3.9e-05	0.027327	0	0.7486	0.000493	0	0	4.7e-05	0	0.000718	0.9701	0.16883	0.4289	1e-06
Start Taukachi-Konkan	0	0	0	0	0	4e-06	8e-06	8e-06	1e-05	1.2e-05	1.6e-05	0.017427	0	1e-06	4.4e-05	0.000162	0	0	1	1	1	1	1e-06	1e-06	0.001197	5e-06	7.6e-05	0.000179	0.002358	0.003045	0.022869	0.04742	0.05777	0.04731	0.12217	0.20273	0.5137	1e-06	0.9996	0.29125	0.000414	7.5e-05	0.006259	0.001167	0.29724	1	0.9644	0.9955	0.04339
UGa-7037	0	0	0	0	0	0	0	0	0	0	0	0.014158	0	0	4e-06	2e-05	0	0	1	1	1	1	0	0	0.000532	0	0	1e-06	0.000386	0.000374	0.006659	0.023389	0.028248	0.017172	0.07042	0.12644	0.4249	0	0.9993	0.21292	0.000119	1.1e-05	0.003994	0.000399	0.22157	1	0.95	0.9935	0.019462
UGa-7040	0	0	0	0	0	0	0	0	0	0	0	0.006239	0	0	0	0	0	0	1	1	1	1	0	0	6e-06	0	0	0	0	0	1e-06	0.000171	0.000165	3e-06	0.001027	0.001672	0.09213	0	0.9884	0.012483	0	0	0.000367	3e-06	0.015385	1	0.6521	0.9083	4.6e-05
UGa-7041	0	0	0	0	0	0	0	0	0	0	0	0.009549	0	0	0	3e-06	0	0	1	1	1	1	0	0	0.000125	0	0	0	4.1e-05	3.4e-05	0.0008	0.004945	0.005785	0.002297	0.018153	0.03482	0.22911	0	0.9968	0.0834	1.8e-05	1e-06	0.00161	6.6e-05	0.09127	1	0.854	0.9723	0.003467
UGa-7042	0	0	0	0	0	0	0	0	0	0	0	0.003394	0	0	0	0	0	0	1	1	1	1	0	0	0	0	0	0	0	0	0	2e-06	1e-06	0	1.5e-05	2e-05	0.026603	0	0.8357	0.000231	0	0	3.1e-05	0	0.000337	0.9998	0.14511	0.4454	0
UGa-7038	0	0	0	0	0	0	0	0	0	0	0	0.003272	0	0	0	0	0	0	1	1	1	1	0	0	0	0	0	0	0	0	0	0	1e-06	0	4e-06	2e-06	0.024404	0	0.8298	5.8e-05	0	0	2.2e-05	0	0.000122	0.9998	0.11782	0.416	0
UGa-7039	0	0	0	0	0	0	0	0	0	0	0	0.002616	0	0	0	0	0	0	0.9999	1	1	1	0	0	0	0	0	0	0	0	0	0	0	0	0	0	0.015092	0	0.6974	1e-06	0	0	8e-06	0	3e-06	0.9992	0.04027	0.24083	0
Beta-535191	0	0	0	0	0	0	0	0	0	0	0	0.005425	0	0	0	0	0	0	1	1	1	1	0	0	4e-06	0	0	0	0	0	0	4.7e-05	3.8e-05	0	0.000326	0.000468	0.06811	0	0.9816	0.00483	0	0	0.000207	1e-06	0.006407	1	0.5406	0.8599	9e-06
Beta-427589	0	0	0	0	0	0	0	0	0	0	0	0.004593	0	0	0	0	0	0	1	1	1	1	0	0	1e-06	0	0	0	0	0	0	8e-06	6e-06	0	4.6e-05	5.9e-05	0.04741	0	0.9648	0.000923	0	0	0.000101	0	0.001387	1	0.3824	0.7582	0
Beta-427588	0	0	0	0	0	0	0	0	0	0	0	0.00446	0	0	0	0	0	0	1	1	1	1	0	0	0	0	0	0	0	0	0	3e-06	3e-06	0	3.1e-05	2.8e-05	0.0442	0	0.9601	0.000562	0	0	7.8e-05	0	0.000893	1	0.3502	0.7329	1e-06
Beta-427587	0	0	0	0	0	0	0	0	0	0	0	0.004353	0	0	0	0	0	0	1	1	1	1	0	0	0	0	0	0	0	0	0	2e-06	2e-06	0	2e-05	1.5e-05	0.04189	0	0.9555	0.000391	0	0	6.9e-05	0	0.000635	1	0.3238	0.71	0
Beta-535190	0	0	0	0	0	0	0	0	0	0	0	0.004016	0	0	0	0	0	0	1	1	1	1	0	0	0	0	0	0	0	0	0	1e-06	1e-06	0	9e-06	4e-06	0.03592	0	0.9334	0.000204	0	0	4.5e-05	0	0.000356	1	0.2462	0.6259	0
Beta-535192	0	0	0	0	0	0	0	0	0	0	0	0.004244	0	0	0	0	0	0	1	1	1	1	0	0	0	0	0	0	0	0	0	1e-06	1e-06	0	1.3e-05	7e-06	0.04	0	0.9501	0.000296	0	0	5.7e-05	0	0.000521	1	0.29998	0.6866	0
Beta-477229	0	0	0	0	0	0	0	0	0	0	0	0.003509	0	0	0	0	0	0	1	1	1	1	0	0	0	0	0	0	0	0	0	0	0	0	4e-06	0	0.027723	0	0.8771	7.3e-05	0	0	2.7e-05	0	0.00013	0.9999	0.14457	0.4825	0
Beta-477227	0	0	0	0	0	0	0	0	0	0	0	0.005073	0	0	0	0	0	0	1	1	1	1	0	0	1e-06	0	0	0	0	0	0	2.6e-05	1.8e-05	0	0.000192	0.000263	0.05902	0	0.9756	0.002822	0	0	0.000157	1e-06	0.003872	1	0.4783	0.823	3e-06
Beta- 477228	0	0	0	0	0	0	0	0	0	0	0	0.004603	0	0	0	0	0	0	1	1	1	1	0	0	0	0	0	0	0	0	0	8e-06	5e-06	0	4.8e-05	5.1e-05	0.04741	0	0.9647	0.000893	0	0	8.6e-05	0	0.001379	1	0.3818	0.7582	0
End Taukachi-Konkan	0	0	0	0	0	0	0	0	0	0	0	0.002274	0	0	0	0	0	0	0.9997	1	1	1	0	0	0	0	0	0	0	0	0	0	0	0	0	0	0.011595	0	0.586	0	0	0	5e-06	0	2e-06	0.9961	0.02614	0.1659	0
Start Huacaloma	0	0.004991	0.007993	0.017682	0.019433	0.05991	0.07177	0.07133	0.07468	0.07649	0.07981	0.11434	0.006641	0.03926	0.06995	0.08281	0.016802	0.014434	0.9998	1	1	1	0.04007	0.04889	0.07244	0.05879	0.09634	0.10207	0.12878	0.14063	0.17472	0.17284	0.18176	0.18944	0.2079	0.23348	0.31006	0.04718	0.8193	0.2476	0.08635	0.07336	0.08794	0.09501	0.24868	0.9964	0.4955	0.6279	0.17764
TK341a	0	0	0	0	0	0	0	0	0	0	0	0.002107	0	0	0	0	0	0	0.9992	1	1	1	0	0	0	0	0	0	0	0	0	0	0	0	2e-06	3e-06	0.011704	0	0.5152	3.7e-05	0	0	8e-06	0	5.5e-05	0.9865	0.03639	0.15927	0
TK409	0	0	0	0	0	0	0	0	0	0	0	0.000964	0	0	0	0	0	0	0.9833	1	0.9999	1	0	0	0	0	0	0	0	0	0	0	0	0	0	0	0.00304	0	0.13881	0	0	0	0	0	0	0.7891	0.00243	0.017157	0
End Huacaloma	0	0	0	0	0	0	0	0	0	0	0	0.000526	0	0	0	0	0	0	0.7672	0.8688	0.8614	0.9521	0	0	0	0	0	0	0	0	0	0	0	0	0	0	0.001286	0	0.05087	0	0	0	0	0	0	0.4164	0.000554	0.004715	0
Start Gramalote	0	0.002243	0.003598	0.00821	0.009065	0.030076	0.0366	0.03645	0.03819	0.03922	0.04113	0.06502	0.003015	0.01917	0.0359	0.04332	0.007812	0.006702	1	1	1	1	0.01954	0.02414	0.0377	0.029466	0.05089	0.05448	0.07165	0.0792	0.1032	0.10313	0.10935	0.11457	0.12997	0.15063	0.23453	0.023467	0.9235	0.16482	0.04545	0.0378	0.04727	0.05057	0.16618	0.9999	0.4936	0.7138	0.10609
Beta-321940	0	0	0	0	0	0	0	0	0	0	0	0.002604	0	0	0	0	0	0	0.9999	1	1	1	0	0	0	0	0	0	0	0	0	0	0	0	0	0	0.015597	0	0.6918	3e-06	0	0	7e-06	0	9e-06	0.9993	0.04469	0.2434	0
Beta-321943	0	0	0	0	0	0	0	0	0	0	0	0.003131	0	0	0	0	0	0	0.9999	1	1	1	0	0	0	0	0	0	0	0	0	0	0	0	2e-06	1e-06	0.022441	0	0.7952	4e-05	0	0	2.1e-05	0	9.4e-05	0.9997	0.10322	0.3786	0
End Gramalote	0	0	0	0	0	0	0	0	0	0	0	0.001624	0	0	0	0	0	0	0.9448	0.9693	0.9676	0.9887	0	0	0	0	0	0	0	0	0	0	0	0	0	0	0.007702	0	0.3777	0	0	0	3e-06	0	2e-06	0.848	0.014755	0.09302	0
Start Chavin	0	3e-05	5e-05	0.000111	0.000128	0.000443	0.000545	0.000544	0.000576	0.000599	0.000621	0.001457	3.9e-05	0.000268	0.000544	0.000676	0.0001	9.4e-05	0.9127	1	0.9994	1	0.000273	0.000346	0.000572	0.000434	0.000802	0.000868	0.001186	0.001332	0.001811	0.001831	0.001961	0.002055	0.002399	0.002829	0.004993	0.000336	0.028518	0.003088	0.000707	0.00057	0.000766	0.000803	0.003144	0.308	0.00847	0.012403	0.001887
AA69448	0	0	0	0	0	0	0	0	0	0	0	0.000162	0	0	0	0	0	0	0.577	0.862	0.837	0.9829	0	0	0	0	0	0	0	0	0	0	0	0	0	0	0.000147	0	0	0	0	0	0	0	0	0.000392	0	0	0
AA69449	0	0	0	0	0	0	0	0	0	0	0	0.000195	0	0	0	0	0	0	0.6667	0.9319	0.9153	0.9907	0	0	0	0	0	0	0	0	0	0	0	0	0	0	0.000179	0	0	0	0	0	0	0	0	0.001709	0	0	0
AA69446	0	0	0	0	0	0	0	0	0	0	0	0.000251	0	0	0	0	0	0	0.8094	0.9972	0.9935	0.9997	0	0	0	0	0	0	0	0	0	0	0	0	0	0	0.000266	0	2.1e-05	0	0	0	0	0	0	0.037	0	0	0
AA69447	0	0	0	0	0	0	0	0	0	0	0	0.000291	0	0	0	0	0	0	0.8589	0.9999	0.9986	1	0	0	0	0	0	0	0	0	0	0	0	0	0	0	0.000314	0	9.7e-05	0	0	0	0	0	0	0.09231	0	0	0
End Chavin	0	0	0	0	0	0	0	0	0	0	0	0.000119	0	0	0	0	0	0	0.4183	0.6753	0.6481	0.9104	0	0	0	0	0	0	0	0	0	0	0	0	0	0	0.000103	0	0	0	0	0	0	0	0	0.000138	0	0	0
End Kotosh Religious Tradition	0	0	0	0	0	0	0	0	0	0	0	0	0	0	0	0	0	0	0	0	0	0	0	0	0	0	0	0	0	0	0	0	0	0	0	0	0	0	0	0	0	0	0	0	0	0	0	0	0
		Huaricanga
[truncated: 157 more columns]

## Sheet: Model B
		Results of order command . Cells show probability that events in columns occurred prior to events in corresponding row
Order	Start Kotosh Religious Tradition	Start Huaricanga	AA102184	AA102185	AA102179	AA84560	AA102181	AA102180	AA10282	AA84551	AA84552	End Huaricanga	Start Huaricoto	Tx-3583	End Huaricoto	Start Huaynuna	UGa-4522	UGa-4520	UGa-5619	UGa-5612	UGa-4521	UGa-5631	UGa-5617	UGa-5614	UGa-5615	UGa-5618	UGa-5632	End Huaynuna	Start Piruro	Gif-7668	Gif-7669	Gif-7670	Gif-7986	Gif-7988	Gif-7989	End Piruro	Start Acshicupoto	PRI-14-108-71	D-AMS 021271	D-AMS 014375	D-AMS 014376	D-AMS 021270	Beta - 423709	Beta - 423708	D-AMS 021269	End Acshicupoto	Start Shillacoto	TK-43	End Shillacoto
Start Kotosh Religious Tradition	0	1	1	1	1	1	1	1	1	1	1	1	1	1	1	1	1	1	1	1	1	1	1	1	1	1	1	1	1	1	1	1	1	1	1	1	1	1	1	1	1	1	1	1	1	1	1	1	1
Start Huaricanga	0	0	1	1	1	1	1	1	1	1	1	1	0.997	1	1	0.9944	1	1	1	1	1	1	1	1	1	1	1	1	0.9295	1	1	1	1	0.9983	1	1	0.9972	1	1	1	1	1	1	1	1	1	0.9891	1	1
AA102184	0	0	0	0.8746	0.9157	1	1	1	1	1	1	1	0.9949	1	1	0.988	1	1	1	1	1	1	1	1	1	1	1	1	0.8687	1	1	1	1	0.9954	1	1	0.993	1	1	1	1	1	1	1	1	1	0.9814	1	1
AA102185	0	0	0.12537	0	0.5778	0.9999	1	1	1	1	1	1	0.9893	1	1	0.9509	0.9989	0.9999	1	1	1	1	1	1	1	1	1	1	0.6749	1	1	1	1	0.9441	1	1	0.9483	0.9985	0.9993	0.9993	0.9993	0.9994	0.9996	0.9999	1	1	0.9609	1	1
AA102179	0	0	0.08427	0.4222	0	0.9999	1	1	1	1	1	1	0.9882	1	1	0.94	0.9983	0.9998	1	1	1	1	1	1	1	1	1	1	0.6315	1	1	1	1	0.9268	1	1	0.9338	0.9977	0.9989	0.999	0.9989	0.9991	0.9994	0.9999	1	1	0.9566	1	1
AA84560	0	0	0	5.9e-05	9.4e-05	0	0.8416	0.8496	0.9184	0.9321	0.9766	1	0.9622	1	1	0.06824	0.17757	0.4524	0.9974	0.9974	0.9995	1	1	1	1	1	1	1	0.013552	1	1	1	1	0.04759	1	1	0.011336	0.026384	0.04187	0.04542	0.0422	0.05788	0.1008	0.31412	0.5165	0.7577	0.8544	1	1
AA102181	0	0	0	0	1e-06	0.15843	0	0.4916	0.6001	0.6466	0.7399	1	0.9557	1	1	0.009673	0.04089	0.16735	0.9198	0.9379	0.987	0.9989	1	1	0.9995	1	1	1	0.001155	1	1	1	1	0.006209	0.9994	1	0.000104	0.000246	0.000532	0.000665	0.000521	0.001451	0.007286	0.07035	0.1542	0.3729	0.827	1	1
AA102180	0	0	0	0	0	0.15045	0.5084	0	0.6149	0.6626	0.7591	1	0.9559	1	1	0.008496	0.03763	0.16253	0.929	0.9449	0.9888	0.9991	1	1	0.9996	1	1	1	0.000946	1	1	1	1	0.005438	0.9995	1	4e-06	1.1e-05	0.000114	0.00015	8.6e-05	0.000672	0.005547	0.06459	0.14699	0.373	0.8279	1	1
AA10282	0	0	0	0	0	0.08164	0.3999	0.3851	0	0.5575	0.6627	1	0.9542	1	1	0.004552	0.020441	0.10459	0.8963	0.92	0.9835	0.9987	1	1	0.9994	0.9999	1	1	0.000541	1	1	1	1	0.002954	0.9993	1	0	1e-06	4.5e-05	6.3e-05	3.1e-05	0.000306	0.002742	0.03321	0.07996	0.26534	0.8206	1	1
AA84551	0	0	0	0	0	0.06789	0.3534	0.3374	0.4425	0	0.6032	1	0.9533	1	1	0.003767	0.01703	0.09018	0.8695	0.8993	0.9783	0.9979	1	1	0.9991	0.9999	1	1	0.000481	1	1	1	1	0.002532	0.9988	1	1.8e-05	3e-05	0.000106	0.000133	9.7e-05	0.000373	0.002543	0.027762	0.06612	0.23141	0.8167	1	1
AA84552	0	0	0	0	0	0.023372	0.26014	0.24093	0.3373	0.3968	0	1	0.9515	1	1	0.001228	0.005864	0.05049	0.8249	0.8645	0.9699	0.9965	1	1	0.9987	0.9999	1	1	0.000149	1	1	1	1	0.000822	0.9978	1	0	3e-06	1.6e-05	1.9e-05	1.3e-05	8.9e-05	0.000694	0.007902	0.022256	0.1521	0.8094	1	1
End Huaricanga	0	0	0	0	0	0	0	0	0	0	0	0	0.9386	1	1	2.1e-05	0.000263	0.0067	0.4188	0.5031	0.7707	0.8661	0.9473	0.9606	0.9375	0.9648	0.9804	0.9897	4e-06	0.9831	0.9975	0.9949	0.9964	2.7e-05	0.8798	0.9989	0	0	0	0	0	0	0	0	0.000455	0.03038	0.7506	0.997	0.9989
Start Huaricoto	0	0.003019	0.005137	0.010698	0.011831	0.03777	0.04434	0.04414	0.04581	0.04672	0.04846	0.06137	0	1	1	0.02556	0.031313	0.03713	0.05652	0.05915	0.07045	0.07541	0.08781	0.09262	0.08976	0.0983	0.10619	0.12722	0.01544	0.11021	0.17039	0.14306	0.15513	0.023558	0.07667	0.27548	0.020287	0.0244	0.027094	0.027534	0.027215	0.028376	0.030378	0.03557	0.03857	0.04254	0.1024	0.16628	0.3282
Tx-3583	0	0	0	0	0	0	0	0	0	0	0	4.5e-05	0	0	1	0	0	0	0	0	0	0	0	0	0	0	0	0.000201	0	0	0	0	0	0	0	0.027194	0	0	0	0	0	0	0	0	0	0	0	0	0.06782
End Huaricoto	0	0	0	0	0	0	0	0	0	0	0	2.3e-05	0	0	0	0	0	0	0	0	0	0	0	0	0	0	0	9.8e-05	0	0	0	0	0	0	0	0.0149	0	0	0	0	0	0	0	0	0	0	0	0	0.03924
Start Huaynuna	0	0.005557	0.011974	0.04914	0.06004	0.9318	0.9903	0.9915	0.9954	0.9962	0.9988	1	0.9744	1	1	0	1	1	1	1	1	1	1	1	1	1	1	1	0.18691	1	1	1	1	0.4137	1	1	0.25566	0.4192	0.5541	0.5739	0.5611	0.6149	0.7091	0.8936	0.966	0.9872	0.9036	1	1
UGa-4522	0	3e-06	1.8e-05	0.001132	0.001665	0.8224	0.9591	0.9624	0.9796	0.983	0.9941	0.9997	0.9687	1	1	0	0	0.7952	0.9994	0.9994	0.9999	1	1	1	1	1	1	1	0.06589	1	1	1	1	0.20487	1	1	0.06002	0.15233	0.27367	0.29594	0.28044	0.3466	0.4679	0.7379	0.8722	0.9354	0.8808	1	1
UGa-4520	0	0	0	0.0001	0.000151	0.5476	0.8327	0.8375	0.8954	0.9098	0.9495	0.9933	0.9629	1	1	0	0.20481	0	0.987	0.9895	0.9978	0.9998	1	1	0.9999	1	1	1	0.020338	1	1	1	1	0.072	0.9999	1	0.014702	0.03938	0.07682	0.08489	0.0786	0.10785	0.17283	0.3988	0.5755	0.7608	0.857	1	1
UGa-5619	0	0	0	0	0	0.002626	0.08018	0.07097	0.10371	0.13046	0.17507	0.5812	0.9435	1	1	0	0.000633	0.01299	0	0.588	0.8595	0.9528	0.9975	0.9993	0.9873	0.9975	1	1	1.2e-05	1	1	1	1	7e-05	0.9633	1	0	0	0	1e-06	0	2e-06	2.2e-05	0.000325	0.002195	0.05154	0.7738	1	1
UGa-5612	0	0	0	0	0	0.00261	0.06207	0.05507	0.08001	0.10066	0.13546	0.4969	0.9409	1	1	0	0.00061	0.010476	0.412	0	0.7967	0.9079	0.9906	0.9966	0.9738	0.9934	0.9998	1	1.7e-05	0.9999	1	1	1	8e-05	0.9236	1	0	0	1e-06	1e-06	1e-06	8e-06	4e-05	0.000522	0.002265	0.04206	0.7617	1	1
UGa-4521	0	0	0	0	0	0.00048	0.01296	0.011158	0.016483	0.021668	0.030095	0.22932	0.9296	1	1	0	0.000126	0.002214	0.14049	0.20326	0	0.6376	0.8991	0.947	0.8673	0.9492	0.9936	1	3e-06	0.9956	1	1	1	1.7e-05	0.6711	1	0	0	0	0	0	1e-06	1e-05	9.3e-05	0.000417	0.012696	0.7086	1	1
UGa-5631	0	0	0	0	0	2.5e-05	0.001106	0.000887	0.001327	0.002069	0.003458	0.13386	0.9246	1	1	0	7e-06	0.000232	0.04717	0.09214	0.3624	0	0.8476	0.9196	0.8111	0.9257	0.9915	1	0	0.9942	1	1	1	1e-06	0.5412	1	0	0	0	0	0	0	0	0	1.6e-05	0.004568	0.6853	1	1
UGa-5617	0	0	0	0	0	0	1e-06	0	0	2e-06	6e-06	0.05267	0.9122	1	1	0	0	0	0.002462	0.0094	0.10085	0.15243	0	0.6547	0.5442	0.7515	0.9262	1	0	0.9444	1	0.9996	1	0	0.1804	1	0	0	0	0	0	0	0	0	0	0.001291	0.6215	0.9999	1
UGa-5614	0	0	0	0	0	0	0	0	0	0	2e-06	0.03935	0.9074	1	1	0	0	0	0.000741	0.003368	0.05304	0.08039	0.3453	0	0.4249	0.6424	0.8508	1	0	0.8835	1	0.9987	0.9999	0	0.09912	1	0	0	0	0	0	0	0	0	0	0.000893	0.5949	0.9997	1
UGa-5615	0	0	0	0	0	1.3e-05	0.000468	0.000411	0.000606	0.000863	0.00128	0.06246	0.9102	1	1	0	4e-06	8.7e-05	0.012741	0.026167	0.13274	0.18893	0.4558	0.5751	0	0.6794	0.8436	1	0	0.8712	1	0.9967	0.9995	0	0.21288	1	0	0	0	0	0	0	0	2e-06	1.3e-05	0.001835	0.609	0.9993	0.9999
UGa-5618	0	0	0	0	0	0	4e-05	3e-05	5.4e-05	7.9e-05	0.000121	0.03522	0.9017	1	1	0	0	8e-06	0.002508	0.00662	0.05082	0.07427	0.24848	0.3576	0.3206	0	0.6943	1	0	0.7456	0.9998	0.9891	0.9979	0	0.08763	1	0	0	0	0	0	0	0	0	1e-06	0.000857	0.5606	0.9977	0.9997
UGa-5632	0	0	0	0	0	0	0	0	0	0	0	0.019616	0.8938	1	1	0	0	0	3.1e-05	0.000171	0.006355	0.008538	0.07384	0.14921	0.15638	0.30573	0	1	0	0.5961	0.9997	0.9792	0.996	0	0.012456	1	0	0	0	0	0	0	0	0	0	0.000381	0.5142	0.9958	0.9994
End Huaynuna	0	0	0	0	0	0	0	0	0	0	0	0.010293	0.8728	0.9998	0.9999	0	0	0	0	0	0	0	0	0	0	0	0	0	0	0.2616	0.9361	0.7961	0.8825	0	0.001177	0.9801	0	0	0	0	0	0	0	0	0	0.000185	0.3841	0.9074	0.974
Start Piruro	0	0.07051	0.13129	0.3251	0.3685	0.9864	0.9988	0.9991	0.9995	0.9995	0.9999	1	0.9846	1	1	0.8131	0.9341	0.9797	1	1	1	1	1	1	1	1	1	1	0	1	1	1	1	1	1	1	0.6945	0.8261	0.8871	0.8936	0.89	0.9058	0.9323	0.9809	0.9958	0.9984	0.9427	1	1
Gif-7668	0	0	0	0	0	0	0	0	0	0	0	0.016897	0.8898	1	1	0	0	0	1.7e-05	9.5e-05	0.004419	0.005791	0.05559	0.11652	0.12879	0.25443	0.4039	0.7384	0	0	0.9993	0.9645	0.9926	0	0.008334	1	0	0	0	0	0	0	0	0	0	0.000329	0.4892	0.9926	0.999
Gif-7669	0	0	0	0	0	0	0	0	0	0	0	0.002499	0.8296	1	1	0	0	0	0	0	0	0	0	2e-06	3e-05	0.000183	0.00033	0.06394	0	0.00067	0	0.07013	0.21577	0	0	1	0	0	0	0	0	0	0	0	0	3.7e-05	0.08591	0.4194	0.8557
Gif-7670	0	0	0	0	0	0	0	0	0	0	0	0.005108	0.8569	1	1	0	0	0	0	0	1.7e-05	1.7e-05	0.000445	0.001319	0.003309	0.010881	0.020784	0.20392	0	0.0355	0.9299	0	0.7453	0	4.2e-05	1	0	0	0	0	0	0	0	0	0	8.2e-05	0.25037	0.8304	0.9696
Gif-7986	0	0	0	0	0	0	0	0	0	0	0	0.003618	0.8449	1	1	0	0	0	0	0	1e-06	2e-06	3.4e-05	7.6e-05	0.000457	0.002121	0.003971	0.1175	0	0.007425	0.7842	0.25473	0	0	3e-06	1	0	0	0	0	0	0	0	0	0	5.5e-05	0.16424	0.6603	0.931
Gif-7988	0	0.001661	0.004596	0.05594	0.07318	0.9524	0.9938	0.9946	0.997	0.9975	0.9992	1	0.9764	1	1	0.5863	0.7951	0.928	0.9999	0.9999	1	1	1	1	1	1	1	1	0	1	1	1	1	0	1	1	0.3629	0.5384	0.6617	0.6789	0.6681	0.713	0.7894	0.9302	0.9796	0.9901	0.9115	1	1
Gif-7989	0	0	0	0	0	1.1e-05	0.000639	0.000513	0.00072	0.001225	0.002156	0.12019	0.9233	1	1	0	5e-06	0.000144	0.0367	0.07639	0.3289	0.4588	0.8196	0.9009	0.7871	0.9124	0.9875	0.9988	0	0.9917	1	1	1	0	0	1	0	0	0	0	0	0	0	0	1e-05	0.003809	0.6786	1	1
End Piruro	0	0	0	0	0	0	0	0	0	0	0	0.001103	0.7245	0.9728	0.9851	0	0	0	0	0	0	0	0	0	1e-06	1e-06	6e-06	0.019912	0	0	0	0	0	0	0	0	0	0	0	0	0	0	0	0	0	1.5e-05	0.016768	0.09493	0.5433
Start Acshicupoto	0	0.002848	0.007008	0.05165	0.06623	0.9887	0.9999	1	1	1	1	1	0.9797	1	1	0.7443	0.94	0.9853	1	1	1	1	1	1	1	1	1	1	0.30549	1	1	1	1	0.6371	1	1	0	1	1	1	1	1	1	1	1	1	0.9245	1	1
PRI-14-108-71	0	0	0	0.001503	0.002347	0.9736	0.9998	1	1	1	1	1	0.9756	1	1	0.5808	0.8477	0.9606	1	1	1	1	1	1	1	1	1	1	0.17392	1	1	1	1	0.4616	1	1	0	0	0.7353	0.757	0.7449	0.7919	0.8618	0.9728	0.9989	1	0.9084	1	1
D-AMS 021271	0	0	0	0.000714	0.001087	0.9581	0.9995	0.9999	1	0.9999	1	1	0.9729	1	1	0.4459	0.7263	0.9232	1	1	1	1	1	1	1	1	1	1	0.11286	1	1	1	1	0.3383	1	1	0	0.26474	0	0.5336	0.5126	0.5982	0.7328	0.9431	0.9976	1	0.8977	1	1
D-AMS 014375	0	0	0	0.000661	0.000996	0.9546	0.9993	0.9999	0.9999	0.9999	1	1	0.9725	1	1	0.4261	0.7041	0.9151	1	1	1	1	1	1	1	1	1	1	0.10643	1	1	1	1	0.3211	1	1	0	0.24299	0.4664	0	0.4781	0.5667	0.7086	0.9356	0.9972	1	0.8962	1	1
D-AMS 014376	0	0	0	0.00069	0.001051	0.9578	0.9995	0.9999	1	0.9999	1	1	0.9728	1	1	0.4389	0.7196	0.9214	1	1	1	1	1	1	1	1	1	1	0.11003	1	1	1	1	0.3319	1	1	0	0.25511	0.4874	0.5219	0	0.588	0.7263	0.9423	0.9977	1	0.8971	1	1
D-AMS 021270	0	0	0	0.000581	0.000881	0.9421	0.9985	0.9993	0.9997	0.9996	0.9999	1	0.9716	1	1	0.3851	0.6534	0.8922	1	1	1	1	1	1	1	1	1	1	0.09421	1	1	1	1	0.28701	1	1	0	0.20812	0.4018	0.4333	0.412	0	0.6489	0.9094	0.9944	1	0.8926	1	1
Beta - 423709	0	0	0	0.000371	0.000588	0.8992	0.9927	0.9945	0.9973	0.9975	0.9993	1	0.9696	1	1	0.29088	0.5321	0.8272	1	1	1	1	1	1	1	1	1	1	0.06769	1	1	1	1	0.21062	1	1	0	0.13819	0.26723	0.29143	0.27368	0.3511	0	0.826	0.9766	1	0.8844	1	1
Beta - 423708	0	0	0	6.7e-05	0.00013	0.6859	0.9297	0.9354	0.9668	0.9722	0.9921	1	0.9644	1	1	0.1064	0.26208	0.6012	0.9997	0.9995	0.9999	1	1	1	1	1	1	1	0.019059	1	1	1	1	0.06984	1	1	0	0.027244	0.05694	0.06442	0.05774	0.09057	0.17401	0	0.7861	1	0.8636	1	1
D-AMS 021269	0	0	0	5e-06	6e-06	0.4835	0.8458	0.853	0.92	0.9339	0.9777	0.9995	0.9614	1	1	0.03403	0.12776	0.4245	0.9978	0.9977	0.9996	1	1	1	1	1	1	1	0.004174	1	1	1	1	0.020368	1	1	0	0.001118	0.002377	0.002835	0.002324	0.005623	0.02343	0.2139	0	1	0.8512	1	1
End Acshicupoto	0	0	0	1e-06	4e-06	0.24235	0.6271	0.627	0.7347	0.7686	0.8479	0.9696	0.9575	1	1	0.012804	0.0646	0.23924	0.9485	0.9579	0.9873	0.9954	0.9987	0.9991	0.9982	0.9991	0.9996	0.9998	0.001629	0.9997	1	0.9999	0.9999	0.009869	0.9962	1	0	0	0	0	0	0	0	0	0	0	0.8346	0.9999	1
Start Shillacoto	0	0.010931	0.01861	0.03913	0.04336	0.1456	0.17297	0.17211	0.17941	0.18326	0.19063	0.24945	0.8976	1	1	0.09643	0.11918	0.14298	0.22622	0.23826	0.29138	0.3147	0.3785	0.4051	0.391	0.4394	0.4858	0.6159	0.05733	0.5108	0.9141	0.7496	0.8358	0.0885	0.3214	0.9832	0.07552	0.09158	0.10231	0.10383	0.10289	0.10735	0.11557	0.13638	0.14882	0.16542	0	1	1
TK-43	0	0	0	0	0	0	0	0	0	0	0	0.002999	0.8337	1	1	0	0	0	0	0	3e-06	5e-06	9.5e-05	0.00026	0.000664	0.002288	0.004243	0.09259	0	0.007379	0.5806	0.16962	0.3397	0	8e-06	0.9051	0	0	0	0	0	0	0	0	0	5.2e-05	0	0	1
End Shillacoto	0	0	0	0	0	0	0	0	0	0	0	0.001101	0.6718	0.9322	0.9608	0	0	0	0	0	0	1e-06	9e-06	3.3e-05	8.3e-05	0.000324	0.000564	0.025981	0	0.001046	0.14426	0.030441	0.06901	0	0	0.4567	0	0	0	0	0	0	0	0	0	2.3e-05	0	0	0
Start Hualcayan	0	0.03475	0.06575	0.19132	0.22334	0.9925	0.9999	1	1	1	1	1	0.9829	1	1	0.8134	0.9611	0.9905	1	1	1	1	1	1	1	1	1	1	0.4251	1	1	1	1	0.7382	1	1	0.65	0.8643	0.9327	0.9366	0.9345	0.9429	0.9586	0.9913	0.9997	0.9999	0.9366	1	1
D-AMS 015768	0	0	0	0.002079	0.003372	0.981	0.9998	1	1	1	1	1	0.9772	1	1	0.6531	0.8947	0.9736	1	1	1	1	1	1	1	1	1	1	0.21848	1	1	1	1	0.5268	1	1	0.3244	0.6307	0.8067	0.8207	0.8134	0.8423	0.8903	0.9776	0.9993	0.9997	0.9147	1	1
D-AMS 008216	0	0	0	0.001168	0.00178	0.9718	0.9997	0.9999	1	0.9999	1	1	0.9751	1	1	0.5586	0.8236	0.9535	1	1	1	1	1	1	1	1	1	1	0.16543	1	1	1	1	0.4379	1	1	0.2041	0.4691	0.6725	0.6955	0.682	0.7364	0.8225	0.9639	0.9986	0.9995	0.9067	1	1
End Hualcayan	0	0	0	0.000486	0.000733	0.7143	0.8107	0.8104	0.8267	0.8335	0.8472	0.8972	0.9579	0.9984	0.9991	0.30111	0.5017	0.6829	0.885	0.8932	0.9217	0.9327	0.9487	0.9531	0.9487	0.9564	0.9623	0.9704	0.07576	0.9643	0.9818	0.9763	0.979	0.22716	0.9348	0.9883	0.07074	0.1932	0.3308	0.3515	0.3381	0.3931	0.4861	0.6699	0.7473	0.7917	0.8428	0.9808	0.9891
Start Caral	0	1.1e-05	3.1e-05	0.000828	0.001202	0.909	0.9953	0.9967	0.9984	0.9984	0.9996	1	0.9693	1	1	0.27112	0.5246	0.8351	1	1	1	1	1	1	1	1	1	1	0.05487	1	1	1	1	0.19023	1	1	0.03318	0.10032	0.23621	0.26533	0.24396	0.3348	0.502	0.8409	0.9788	0.994	0.8832	1	1
Beta-132593	0	0	0	0	0	0	3.7e-05	1.9e-05	3.2e-05	0.000119	0.000311	0.1259	0.926	1	1	0	0	2e-05	0.026763	0.07576	0.391	0.5562	0.9072	0.9596	0.8543	0.9513	0.9973	1	0	0.9984	1	1	1	0	0.6027	1	0	0	0	0	0	0	0	0	0	0.003613	0.6928	1	1
ISGS-4724	0	0	0	0	0	0.000484	0.014803	0.012768	0.018934	0.024891	0.03543	0.27782	0.9335	1	1	1.7e-05	0.000148	0.00257	0.18034	0.26092	0.6101	0.7653	0.9658	0.9867	0.9295	0.9794	0.9993	1	4e-06	0.9996	1	1	1	1.7e-05	0.7968	1	0	0	0	0	0	0	6e-06	5.7e-05	0.000396	0.015145	0.7278	1	1
Beta-134427	0	0	0	0	0	0.003296	0.03965	0.03571	0.05035	0.06253	0.08291	0.3601	0.936	1	1	0.00018	0.000862	0.007752	0.26806	0.3471	0.6672	0.8046	0.97	0.9882	0.9406	0.9824	0.9993	1	2.1e-05	0.9996	1	1	1	0.00012	0.8305	1	0	2e-06	9e-06	1.2e-05	1.1e-05	2.6e-05	0.000129	0.001116	0.003024	0.029737	0.7391	1	1
ISGS-4738	0	0	0	0	0	0.001538	0.028868	0.025514	0.03693	0.04675	0.06374	0.3321	0.9352	1	1	6.8e-05	0.000409	0.00519	0.23827	0.3195	0.6523	0.7959	0.9703	0.9883	0.9385	0.9821	0.9993	1	1.3e-05	0.9996	1	1	1	5.9e-05	0.8234	1	0	0	1e-06	2e-06	2e-06	5e-06	4e-05	0.000424	0.001405	0.023113	0.7358	1	1
ISGS-4740	0	0	0	0	0	0.005286	0.07577	0.06841	0.09696	0.11953	0.15773	0.5183	0.9416	1	1	0.000258	0.001353	0.014164	0.4328	0.5176	0.8054	0.9139	0.992	0.9973	0.9757	0.9941	0.9999	1	3.3e-05	0.9999	1	1	1	0.00018	0.9287	1	0	1e-06	9e-06	1e-05	8e-06	2.5e-05	0.000165	0.001622	0.004793	0.05039	0.7643	1	1
Beta-132589	0	0	0	0	0	0.003693	0.07631	0.06833	0.09886	0.12346	0.16413	0.5475	0.9425	1	1	0.000172	0.000993	0.013342	0.4638	0.5513	0.8338	0.9356	0.9956	0.9986	0.9825	0.9962	0.9999	1	2.2e-05	1	1	1	1	0.000129	0.9482	1	0	0	2e-06	2e-06	0	8e-06	7.2e-05	0.00086	0.003201	0.05023	0.769	1	1
ISGS-4710	0	0	0	0	0	0.01234	0.11765	0.10773	0.14983	0.18013	0.23163	0.6181	0.9443	1	1	0.000683	0.003187	0.024201	0.5377	0.6158	0.8617	0.9482	0.9962	0.9988	0.9855	0.9968	0.9999	1	7.8e-05	1	1	1	1	0.000455	0.9582	1	1e-06	4e-06	2.5e-05	3.6e-05	2.5e-05	9.7e-05	0.000489	0.004591	0.011612	0.07576	0.7775	1	1
GS-4726	0	0	0	0	0	0.05782	0.24988	0.23821	0.30697	0.3484	0.4207	0.7893	0.9495	1	1	0.00377	0.015503	0.07102	0.721	0.7764	0.9346	0.983	0.9994	0.9998	0.9952	0.9992	1	1	0.000476	1	1	1	1	0.002494	0.9873	1	2.1e-05	7.2e-05	0.00039	0.000546	0.000414	0.001047	0.00378	0.026668	0.05648	0.17312	0.8003	1	1
ISGS-4733	0	0	0	3e-06	9e-06	0.20401	0.4737	0.4673	0.5455	0.5809	0.6506	0.8956	0.9546	1	1	0.019343	0.06319	0.19875	0.8518	0.8825	0.9683	0.9932	0.9998	0.9999	0.998	0.9997	1	1	0.002618	1	1	1	1	0.012464	0.995	1	0.000402	0.001428	0.005807	0.007184	0.00598	0.011644	0.02791	0.11692	0.20854	0.3823	0.8219	1	1
ISGS-4734	0	0	0	6e-06	1.3e-05	0.23323	0.497	0.4916	0.5652	0.598	0.6633	0.893	0.955	1	1	0.025214	0.07657	0.22331	0.8513	0.881	0.9664	0.9917	0.9997	0.9999	0.9976	0.9996	1	1	0.003613	1	1	1	1	0.016323	0.9938	1	0.000697	0.002561	0.009554	0.011609	0.009938	0.01789	0.03942	0.1421	0.24108	0.4103	0.8236	1	1
Beta-134429	0	0	0	0	1e-06	0.25314	0.633	0.633	0.7352	0.7691	0.8461	0.9801	0.9578	1	1	0.014999	0.06512	0.24565	0.957	0.966	0.993	0.9994	1	1	0.9997	1	1	1	0.001795	1	1	1	1	0.009763	0.9997	1	1.2e-05	3.4e-05	0.000517	0.000709	0.000472	0.002113	0.011845	0.11559	0.2464	0.5105	0.836	1	1
ISGS-4729	0	0	0	8e-06	7e-06	0.30856	0.6249	0.6236	0.7046	0.7343	0.7991	0.9558	0.9578	1	1	0.029955	0.09682	0.28896	0.9283	0.9438	0.9866	0.9981	1	1	0.9994	0.9999	1	1	0.004089	1	1	1	1	0.01927	0.9987	1	0.000636	0.002246	0.009223	0.011351	0.00955	0.018625	0.0445	0.181	0.3167	0.5277	0.8358	1	1
ISGS-4732	0	0	0	7e-06	9e-06	0.30855	0.6247	0.6237	0.7047	0.7346	0.7996	0.9557	0.9578	1	1	0.029986	0.09666	0.28902	0.9285	0.9438	0.9866	0.998	1	1	0.9994	0.9999	1	1	0.004059	1	1	1	1	0.019149	0.9987	1	0.000645	0.002285	0.00932	0.01131	0.009492	0.018726	0.04453	0.18093	0.3171	0.5281	0.8359	1	1
Beta-134428	0	0	0	4e-06	3e-06	0.441	0.8193	0.8277	0.9067	0.9224	0.9734	0.9992	0.9611	1	1	0.03474	0.12701	0.3982	0.9971	0.997	0.9994	1	1	1	1	1	1	1	0.004297	1	1	1	1	0.02223	1	1	0.000233	0.000801	0.005753	0.007405	0.005723	0.014737	0.0451	0.24169	0.4469	0.722	0.8499	1	1
ISGS-4736	0	0	0	2.5e-05	4.1e-05	0.5447	0.8406	0.8458	0.9029	0.9165	0.9555	0.9943	0.9624	1	1	0.07484	0.20113	0.4884	0.9887	0.9909	0.998	0.9998	1	1	0.9999	1	1	1	0.011104	1	1	1	1	0.04808	0.9999	1	0.002503	0.009614	0.03561	0.04262	0.03664	0.06431	0.13091	0.38	0.5795	0.7699	0.8551	1	1
ISGS-4711	0	0	0	4.2e-05	5.9e-05	0.5577	0.8298	0.8334	0.8856	0.8999	0.9372	0.9884	0.9625	1	1	0.08686	0.21988	0.5017	0.9804	0.9845	0.9965	0.9995	1	1	0.9998	1	1	1	0.013438	1	1	1	1	0.05647	0.9997	1	0.003512	0.013939	0.04764	0.05629	0.04927	0.08188	0.15593	0.407	0.5964	0.7649	0.8552	1	1
Beta-184980	0	0	0	0	0	1.8e-05	0.000893	0.000728	0.001121	0.001785	0.002966	0.14896	0.9273	1	1	0	9e-06	0.000189	0.05024	0.10658	0.4315	0.5957	0.9157	0.9625	0.8668	0.9553	0.9972	0.9999	0	0.9983	1	1	1	0	0.6391	1	0	0	0	0	0	0	0	0	1.2e-05	0.004847	0.6986	1	1
Beta-184984	0	0	0	0	0	5.7e-05	0.002568	0.002099	0.003214	0.004816	0.007933	0.19155	0.9301	1	1	1e-06	1.9e-05	0.000551	0.0899	0.16067	0.5148	0.6844	0.949	0.98	0.9032	0.9707	0.9988	1	0	0.9993	1	1	1	2e-06	0.7233	1	0	0	0	0	0	0	0	1e-06	4.3e-05	0.007085	0.7119	1	1
Beta-184979	0	0	0	0	0	0.004029	0.06441	0.05771	0.08243	0.10226	0.13598	0.4844	0.9405	1	1	0.000213	0.001051	0.011691	0.3978	0.4837	0.784	0.8993	0.99	0.9965	0.9715	0.9929	0.9998	1	2.8e-05	0.9999	1	1	1	0.000137	0.9162	1	0	0	4e-06	5e-06	2e-06	1.9e-05	0.000118	0.001154	0.003606	0.04369	0.7599	1	1
Beta-184981	0	0	0	0	0	0.00939	0.10243	0.09329	0.13066	0.15827	0.20553	0.5857	0.9434	1	1	0.000524	0.002391	0.020346	0.5038	0.5844	0.8446	0.9379	0.9951	0.9983	0.9827	0.9961	0.9999	1	6.3e-05	1	1	1	1	0.000326	0.9499	1	1e-06	3e-06	1.8e-05	2.6e-05	1.8e-05	6.6e-05	0.000349	0.003302	0.008785	0.06661	0.7732	1	1
Beta-184977	0	0	0	6e-06	1.2e-05	0.30813	0.6251	0.6238	0.7047	0.7347	0.7996	0.9558	0.9578	1	1	0.030158	0.09664	0.28828	0.9286	0.944	0.9867	0.9981	1	1	0.9994	0.9999	1	1	0.00412	1	1	1	1	0.019262	0.9987	1	0.000624	0.002202	0.009297	0.011264	0.00941	0.018521	0.04461	0.18092	0.3165	0.5276	0.8358	1	1
Beta-184983	0	0	0	2.4e-05	3.4e-05	0.4609	0.7614	0.7638	0.8292	0.8485	0.8966	0.9795	0.9608	1	1	0.06053	0.1663	0.4184	0.9661	0.973	0.9937	0.9991	1	1	0.9997	1	1	1	0.00904	1	1	1	1	0.03927	0.9994	1	0.00206	0.007981	0.028406	0.03405	0.029327	0.05124	0.10408	0.31213	0.4869	0.6818	0.8482	1	1
Beta-184985	0	0	0	2.7e-05	4e-05	0.5451	0.8411	0.8463	0.9031	0.9169	0.9559	0.9943	0.9624	1	1	0.07482	0.20153	0.4893	0.9889	0.9909	0.998	0.9998	1	1	0.9999	1	1	1	0.011102	1	1	1	1	0.04815	0.9999	1	0.00256	0.009685	0.03558	0.04273	0.03678	0.06467	0.13128	0.3804	0.5798	0.7702	0.8552	1	1
Beta-184973	0	0	0	6.8e-05	0.000107	0.7355	0.9398	0.9442	0.9707	0.9753	0.9922	0.9998	0.9654	1	1	0.13832	0.3233	0.6565	0.9994	0.9993	0.9999	1	1	1	1	1	1	1	0.022109	1	1	1	1	0.09023	1	1	0.00599	0.024767	0.08557	0.10082	0.08854	0.14412	0.26171	0.5949	0.8033	0.9052	0.8676	1	1
End Caral	0	0	0	0	0	0	2e-06	1e-06	0	2e-06	8e-06	0.07916	0.9196	1	1	0	0	1e-06	0.006799	0.026228	0.21874	0.3288	0.7637	0.8695	0.7292	0.8858	0.9824	0.9982	0	0.9885	1	0.9999	1	0	0.3732	1	0	0	0	0	0	0	0	0	0	0.002005	0.6609	1	1
Start Kotosh	0	0.016098	0.027558	0.0582	0.06456	0.22572	0.27104	0.26953	0.28192	0.28846	0.30098	0.4046	0.932	1	1	0.14711	0.18317	0.22162	0.3641	0.3863	0.489	0.5344	0.6667	0.7207	0.6867	0.7735	0.8518	0.9416	0.08676	0.8791	0.9997	0.9914	0.9979	0.13475	0.5476	1	0.11405	0.13891	0.15603	0.15857	0.15684	0.16393	0.17739	0.21071	0.23076	0.25842	0.7056	0.998	0.9997
TK-110	0	0	0	0	0	0	0	0	1e-06	1e-06	2e-06	0.018884	0.8895	1	1	0	0	0	0.000216	0.00083	0.011618	0.016918	0.08825	0.15312	0.15366	0.27675	0.4164	0.7169	0	0.4989	0.9976	0.9425	0.9833	0	0.02129	0.9999	0	0	0	0	0	0	0	0	0	0.000388	0.4844	0.9864	0.9979
End Kotosh	0	0	0	0	0	0	0	0	0	0	0	0.005843	0.7565	0.9563	0.9746	0	0	0	2.4e-05	0.000113	0.001784	0.002449	0.014842	0.027489	0.030374	0.06003	0.09552	0.2402	0	0.12357	0.5331	0.3836	0.4603	0	0.003223	0.6988	0	0	0	0	0	0	0	0	0	0.00012	0.19567	0.5054	0.7177
Start La Galgada	0	0.006286	0.01304	0.04618	0.05527	0.8929	0.9803	0.9819	0.9904	0.9922	0.9975	1	0.9727	1	1	0.4255	0.6411	0.8488	0.9999	0.9998	1	1	1	1	1	1	1	1	0.15673	1	1	1	1	0.3486	1	1	0.20562	0.3346	0.4558	0.475	0.4621	0.5177	0.6183	0.8332	0.93	0.9723	0.8967	1	1
TX3167	0	0	0	0	0	0.003474	0.07465	0.06675	0.09643	0.12003	0.16048	0.5382	0.942	1	1	0.000146	0.000936	0.012922	0.4543	0.5407	0.8231	0.9256	0.9932	0.9976	0.979	0.9949	0.9999	1	2.1e-05	0.9999	1	1	1	0.00012	0.939	1	0	0	2e-06	2e-06	2e-06	1e-05	6.7e-05	0.000777	0.003052	0.04878	0.7673	1	1
TK4449	0	0	0	0	0	0.002711	0.05044	0.04499	0.06443	0.08067	0.10845	0.4264	0.9382	1	1	0.000125	0.000716	0.008931	0.3388	0.4214	0.7261	0.8482	0.9764	0.99	0.9533	0.9861	0.9993	1	1.6e-05	0.9996	1	1	1	8.3e-05	0.8696	1	0	0	2e-06	4e-06	2e-06	8e-06	5.8e-05	0.000683	0.002401	0.03517	0.7496	1	1
TK4448	0	0	0	0	0	2e-06	0.000139	0.000103	0.00015	0.00031	0.000576	0.08962	0.9193	1	1	0	2e-06	3.4e-05	0.017249	0.0427	0.2372	0.3415	0.719	0.8281	0.7075	0.8634	0.9698	0.9956	0	0.9793	1	0.9999	1	0	0.38	1	0	0	0	0	0	0	0	0	2e-06	0.002557	0.6587	1	1
UGa4583	0	0	0	0	0	2e-06	9.6e-05	8.1e-05	0.000113	0.000188	0.000312	0.05587	0.9099	1	1	0	1e-06	1.9e-05	0.006988	0.017878	0.11644	0.17032	0.4504	0.5745	0.4949	0.6755	0.834	0.9534	0	0.8744	1	0.9971	0.9996	0	0.19412	1	0	0	0	0	0	0	0	0	2e-06	0.001474	0.6073	0.9994	0.9999
TX-2463	0	0	0	0	0	0	5e-06	3e-06	7e-06	8e-06	1.7e-05	0.020362	0.8895	1	1	0	0	2e-06	0.000595	0.001709	0.01722	0.024925	0.10632	0.17205	0.16734	0.28869	0.4234	0.709	0	0.4999	0.9964	0.9319	0.9784	0	0.030281	0.9999	0	0	0	0	0	0	0	0	0	0.000454	0.4828	0.983	0.9973
TX-2464	0	0	0	0	0	0	0	0	0	0	0	0.01492	0.8843	1	1	0	0	0	7.6e-05	0.000306	0.005479	0.007672	0.05109	0.0972	0.1046	0.20238	0.3179	0.6295	0	0.3959	0.9952	0.9056	0.9695	0	0.010138	0.9998	0	0	0	0	0	0	0	0	0	0.000289	0.4498	0.9766	0.9963
TX-3166	0	0	0	0	0	9.2e-05	0.002617	0.002192	0.003259	0.004405	0.0065	0.12058	0.9207	1	1	6e-06	2.7e-05	0.000441	0.04664	0.08123	0.29258	0.4008	0.7269	0.8193	0.7185	0.8561	0.9537	0.99	0	0.9665	1	0.9995	0.9999	2e-06	0.4355	1	0	0	0	0	0	0	1e-06	1.1e-05	6e-05	0.004698	0.6642	0.9999	1
TX-3663	0	0	0	0	0	0	0	0	0	0	0	0.028065	0.9011	1	1	0	0	0	0.00017	0.000871	0.022141	0.03278	0.19011	0.3149	0.28822	0.4826	0.686	0.9139	0	0.7637	1	0.9959	0.9996	0	0.04216	1	0	0	0	0	0	0	0	0	0	0.000597	0.5593	0.9992	0.9999
TX-3664	0	0	0	0.000198	0.000291	0.7363	0.9341	0.9387	0.9681	0.9736	0.9921	0.9999	0.9663	1	1	0.18372	0.3742	0.6718	0.9995	0.9994	0.9999	1	1	1	1	1	1	1	0.03795	1	1	1	1	0.12947	1	1	0.02719	0.07628	0.15457	0.1709	0.15842	0.213	0.3235	0.6144	0.7878	0.893	0.8711	1	1
TX-4446	0	0	0	0	0	0	0	0	0	0	0	0.002826	0.8305	1	1	0	0	0	0	0	5e-06	2e-06	8e-05	0.00024	0.000609	0.002056	0.003955	0.08433	0	0.006618	0.5197	0.1423	0.28903	0	8e-06	0.8853	0	0	0	0	0	0	0	0	0	4.4e-05	0.10718	0.4511	0.8516
TX-4447	0	0	0	0	0	3.9e-05	0.00142	0.001198	0.001822	0.00261	0.004032	0.11992	0.9221	1	1	1e-06	1.2e-05	0.000281	0.04138	0.07806	0.3092	0.4272	0.7741	0.8632	0.7544	0.887	0.9745	0.9958	0	0.9821	1	0.9998	1	1e-06	0.4658	1	0	0	0	0	0	0	0	1e-06	2.9e-05	0.004126	0.672	1	1
End La Galgada	0	0	0	0	0	0	0	0	0	0	0	0.001797	0.7902	0.9966	0.9983	0	0	0	0	0	0	0	1.2e-05	3.5e-05	0.000131	0.000514	0.000999	0.04382	0	0.001754	0.25347	0.05491	0.12179	0	0	0.6773	0	0	0	0	0	0	0	0	0	2.9e-05	0.04975	0.22873	0.6897
Start Pampa de las Llamas	0	0	0	0	0	0.000109	0.000819	0.00067	0.000963	0.001398	0.002209	0.0996	0.9208	1	1	1.4e-05	3e-05	0.000214	0.025525	0.05279	0.25872	0.3693	0.7619	0.8646	0.7377	0.8856	0.981	0.9982	2e-06	0.9875	1	0.9999	1	9e-06	0.4097	1	2e-06	4e-06	8e-06	1e-05	8e-06	1.2e-05	2e-05	5.9e-05	0.000116	0.003241	0.6659	1	1
UGa-5796	0	0	0	0	0	1e-06	2.5e-05	2e-05	3.5e-05	6.8e-05	0.000124	0.06013	0.9137	1	1	0	0	1.3e-05	0.005392	0.015492	0.12893	0.19345	0.558	0.6999	0.5819	0.774	0.925	0.9849	0	0.9465	1	0.9994	1	0	0.22471	1	0	0	0	0	0	0	0	0	1e-06	0.001517	0.6291	0.9999	1
UGa-4505	0	0	0	0	0	0	2.4e-05	1.4e-05	2.4e-05	4.8e-05	0.000101	0.06113	0.9144	1	1	0	0	4e-06	0.005313	0.015712	0.13403	0.20184	0.5793	0.7217	0.5984	0.7907	0.9378	0.989	0	0.9562	1	0.9996	1	0	0.23407	1	0	0	0	0	0	0	0	0	0	0.001578	0.6331	0.9999	1
UGa-5461	0	0	0	0	0	0	0	0	0	0	0	0.023323	0.8964	1	1	0	0	0	8.9e-05	0.000508	0.014678	0.021443	0.1344	0.23146	0.22103	0.3855	0.566	0.8404	0	0.6518	0.9997	0.9837	0.9969	0	0.028282	1	0	0	0	0	0	0	0	0	0	0.000501	0.5298	0.9966	0.9995
UGa-5462	0	0	0	0	0	0	0	0	0	0	0	0.022656	0.8957	1	1	0	0	0	8.6e-05	0.000414	0.013326	0.019389	0.12502	0.21839	0.21064	0.3717	0.5489	0.8307	0	0.6365	0.9997	0.9819	0.9965	0	0.025638	1	0	0	0	0	0	0	0	0	0	0.00047	0.5254	0.9962	0.9995
UGa-5801	0	0	0	0	0	0	0	0	0	0	1e-06	0.020435	0.8919	1	1	0	0	0	9.8e-05	0.000482	0.012034	0.017826	0.10677	0.1839	0.17921	0.3177	0.4717	0.7606	0	0.5543	0.9983	0.956	0.9878	0	0.023152	1	0	0	0	0	0	0	0	0	0	0.000418	0.5005	0.9898	0.9985
UGa-4506	0	0	0	0	0	0	0	0	0	0	0	0.019397	0.8918	1	1	0	0	0	4.8e-05	0.000274	0.008992	0.01281	0.09033	0.16441	0.16609	0.30435	0.4615	0.7652	0	0.5499	0.9989	0.9634	0.9911	0	0.017272	1	0	0	0	0	0	0	0	0	0	0.000401	0.5006	0.9918	0.9988
UGa-5799	0	0	0	0	0	0	0	0	0	0	0	0.015923	0.889	1	1	0	0	0	2e-06	1.7e-05	0.002679	0.00311	0.04238	0.09716	0.11393	0.23341	0.3787	0.7267	0	0.4782	0.9994	0.965	0.9932	0	0.00494	1	0	0	0	0	0	0	0	0	0	0.000302	0.4844	0.9927	0.999
UGa-4508	0	0	0	0	0	0	0	0	0	0	0	0.012786	0.8812	1	1	0	0	0	4e-06	2.5e-05	0.002134	0.002739	0.029816	0.06494	0.07615	0.15806	0.2577	0.5758	0	0.3324	0.9938	0.8828	0.9609	0	0.004103	0.9998	0	0	0	0	0	0	0	0	0	0.000232	0.4288	0.9704	0.9954
UGa-5800	0	0	0	0	0	0	0	0	0	0	0	0.006629	0.8651	1	1	0	0	0	0	0	7.7e-05	7.2e-05	0.001686	0.004522	0.009126	0.026823	0.05	0.29383	0	0.08052	0.9755	0.674	0.8679	0	0.000149	0.999	0	0	0	0	0	0	0	0	0	0.000108	0.31226	0.9089	0.9849
UGa-4509	0	0	0	0	0	0	0	0	0	0	0	0.006658	0.8621	1	1	0	0	0	0	1e-06	0.000299	0.000331	0.004922	0.011851	0.016791	0.04021	0.07001	0.291	0	0.10068	0.9271	0.5934	0.7853	0	0.000517	0.993	0	0	0	0	0	0	0	0	0	0.000111	0.29084	0.8529	0.9723
UGa-5611	0	0	0	0	0	0	0	0	0	0	0	0.005714	0.8593	1	1	0	0	0	0	0	8.4e-05	7.3e-05	0.001596	0.004102	0.007422	0.020774	0.03804	0.24101	0	0.05985	0.9292	0.5475	0.7677	0	0.000137	0.9944	0	0	0	0	0	0	0	0	0	9.4e-05	0.26905	0.8431	0.9714
UGa-5610	0	0	0	0	0	0	0	0	0	0	0	0.004098	0.8502	1	1	0	0	0	0	0	3e-06	1e-06	1.9e-05	6.8e-05	0.000573	0.002821	0.005207	0.14183	0	0.010295	0.875	0.3501	0.625	0	2e-06	0.9902	0	0	0	0	0	0	0	0	0	6.6e-05	0.19958	0.7537	0.9539
UGa-5795	0	0	0	0	0	0	0	0	0	0	0	0.003586	0.845	1	1	0	0	0	0	0	0	1e-06	1.4e-05	4.2e-05	0.000337	0.001752	0.003174	0.11596	0	0.006207	0.7899	0.25289	0.5055	0	1e-06	0.9789	0	0	0	0	0	0	0	0	0	5.3e-05	0.16464	0.6677	0.9341
UGa-5609	0	0	0	0	0	0	0	0	0	0	0	0.003378	0.8423	1	1	0	0	0	0	0	0	0	1.5e-05	4.2e-05	0.000309	0.001477	0.002699	0.10487	0	0.005245	0.7341	0.21085	0.4428	0	2e-06	0.9682	0	0	0	0	0	0	0	0	0	5.3e-05	0.14793	0.6183	0.9208
UGa-5797	0	0	0	0	0	0	0	0	0	0	0	0.003163	0.8401	1	1	0	0	0	0	0	0	0	1e-05	2.7e-05	0.000198	0.001034	0.00193	0.09555	0	0.003812	0.6951	0.1769	0.3971	0	0	0.961	0	0	0	0	0	0	0	0	0	5e-05	0.13503	0.582	0.9114
UGa-5630	0	0	0	0	0	0	0	0	0	0	0	0.002713	0.8339	1	1	0	0	0	0	0	0	0	0	7e-06	6.6e-05	0.000356	0.000641	0.07324	0	0.00129	0.5725	0.09906	0.27384	0	0	0.9323	0	0	0	0	0	0	0	0	0	4.2e-05	0.1012	0.4769	0.8804
UGa-5794	0	0	0	0	0	0	0	0	0	0	0	0.002646	0.8328	1	1	0	0	0	0	0	0	0	1e-06	2e-06	4.5e-05	0.000316	0.000495	0.07028	0	0.001021	0.5511	0.089	0.25621	0	0	0.9264	0	0	0	0	0	0	0	0	0	4.4e-05	0.09642	0.4604	0.875
UGa-4511	0	0	0	0	0	0	0	0	0	0	0	0.002989	0.8339	1	1	0	0	0	0	0	7e-06	5e-06	0.000133	0.000343	0.000743	0.002411	0.004521	0.08973	0	0.007576	0.5602	0.15332	0.31352	0	9e-06	0.9107	0	0	0	0	0	0	0	0	0	4.6e-05	0.11519	0.4835	0.8709
UGa-4503	0	0	0	0	0	0	0	0	0	0	0	0.002595	0.8302	1	1	0	0	0	0	0	1e-06	0	1.1e-05	2.7e-05	0.000134	0.000577	0.001042	0.06905	0	0.001929	0.4965	0.09195	0.23575	0	1e-06	0.8991	0	0	0	0	0	0	0	0	0	4.2e-05	0.09117	0.423	0.8552
UGa-5798	0	0	0	0	0	0	0	0	0	0	0	0.002702	0.8303	1	1	0	0	0	0	0	2e-06	2e-06	4.3e-05	0.000115	0.000336	0.001139	0.002105	0.07454	0	0.003741	0.5007	0.1102	0.25312	0	6e-06	0.8948	0	0	0	0	0	0	0	0	0	4e-05	0.0963	0.431	0.8543
UGa-5873	0	0	0	0	0	0	0	0	0	0	0	0.001793	0.8153	1	1	0	0	0	0	0	0	0	0	0	0	0	0	0.03561	0	0	0.18001	0.00254	0.025042	0	0	0.7893	0	0	0	0	0	0	0	0	0	3e-05	0.033	0.18528	0.7644
UGa-4504	0	0	0	0	0	0	0	0	0	0	0	0.002018	0.8181	1	1	0	0	0	0	0	0	0	2e-06	4e-06	1.9e-05	9e-05	0.000162	0.04363	0	0.000308	0.27879	0.025567	0.09053	0	0	0.8103	0	0	0	0	0	0	0	0	0	3.2e-05	0.04856	0.25533	0.7837
End Pampa de las Llamas	0	0	0	0	0	0	0	0	0	0	0	0.001349	0.7974	1	1	0	0	0	0	0	0	0	0	0	0	0	0	0.022913	0	0	0.07243	0.00027	0.006314	0	0	0.6374	0	0	0	0	0	0	0	0	0	2.2e-05	0.014349	0.0907	0.6624
Start Buena Vista	0	0.000176	0.000343	0.001085	0.001307	0.04015	0.09481	0.09098	0.10987	0.12383	0.14822	0.4338	0.939	1	1	0.011081	0.020306	0.04227	0.3485	0.4253	0.7198	0.842	0.9772	0.9912	0.9527	0.9863	0.9995	1	0.003663	0.9997	1	1	1	0.008686	0.8637	1	0.004348	0.007084	0.010224	0.01082	0.010402	0.012304	0.016415	0.029635	0.04087	0.07989	0.7524	1	1
GX-32177	0	0	0	0	0	0.000293	0.006906	0.005908	0.008658	0.011856	0.01756	0.19905	0.9285	1	1	1.1e-05	0.000104	0.001283	0.10963	0.16965	0.4673	0.6089	0.8987	0.9498	0.8614	0.9488	0.9948	0.9996	1e-06	0.9967	1	1	1	8e-06	0.6462	1	0	0	0	0	1e-06	2e-06	1e-05	6.6e-05	0.000266	0.009221	0.7036	1	1
GX-31276	0	0	0	0	0	0.000204	0.004938	0.004141	0.006223	0.00865	0.012905	0.17976	0.9273	1	1	9e-06	6.3e-05	0.000962	0.09201	0.14733	0.4359	0.5755	0.8818	0.9391	0.845	0.9406	0.993	0.9994	2e-06	0.9954	1	1	1	8e-06	0.6135	1	0	0	0	0	0	0	6e-06	3.4e-05	0.000163	0.007741	0.6978	1	1
UGAMS- 2685	0	0	0	0	0	0	0	0	0	0	0	0.04583	0.9119	1	1	0	0	0	0.000408	0.00254	0.06758	0.10498	0.4805	0.6627	0.5355	0.7642	0.9518	0.9962	0	0.9682	1	0.9999	1	0	0.13236	1	0	0	0	0	0	0	0	0	0	0.001075	0.6205	1	1
GX-31920	0	0	0	0	0	1.4e-05	0.00063	0.000507	0.00078	0.001166	0.001929	0.0917	0.9175	1	1	1e-06	5e-06	0.000123	0.024749	0.05026	0.22752	0.3204	0.6542	0.7598	0.6573	0.8124	0.9282	0.9828	0	0.9472	1	0.9991	0.9999	0	0.3539	1	0	0	0	0	0	0	0	2e-06	1.2e-05	0.002888	0.6477	0.9998	1
UGAMS- 3128	0	0	0	0	0	0	0	0	0	0	0	0.020812	0.897	1	1	0	0	0	0	8e-06	0.004174	0.004714	0.07411	0.17046	0.18792	0.3668	0.5756	0.892	0	0.6856	1	0.9961	0.9998	0	0.007732	1	0	0	0	0	0	0	0	0	0	0.000408	0.5362	0.9992	0.9999
UGAMS- 3127	0	0	0	0	0	0	0	0	0	0	0	0.01507	0.8891	1	1	0	0	0	0	0	0.001316	0.001174	0.027223	0.07178	0.09526	0.20984	0.3549	0.7339	0	0.4652	0.9999	0.9808	0.9976	0	0.002247	1	0	0	0	0	0	0	0	0	0	0.000285	0.4869	0.9963	0.9996
UGAMS- 3126	0	0	0	0	0	0	0	0	0	0	0	0.011574	0.8825	1	1	0	0	0	0	0	0.000511	0.000454	0.010742	0.028699	0.04547	0.11297	0.20381	0.5823	0	0.29279	0.9997	0.9518	0.9927	0	0.000878	1	0	0	0	0	0	0	0	0	0	0.000197	0.4426	0.9909	0.9989
UGAMS- 3129	0	0	0	0	0	0	0	0	0	0	0	0.011575	0.8825	1	1	0	0	0	0	0	0.000515	0.000482	0.010719	0.028769	0.04545	0.11299	0.20384	0.582	0	0.29307	0.9997	0.9521	0.9927	0	0.000893	1	0	0	0	0	0	0	0	0	0	0.000199	0.4427	0.9909	0.9988
End Buena Vista	0	0	0	0	0	0	0	0	0	0	0	0.006648	0.8631	0.9998	0.9999	0	0	0	0	0	4.2e-05	3.1e-05	0.000762	0.002222	0.007318	0.025012	0.0493	0.30979	0	0.08571	0.9255	0.6987	0.8441	0	7.2e-05	0.9788	0	0	0	0	0	0	0	0	0	0.000109	0.31511	0.8791	0.9688
Start El Paraiso	0	0.000424	0.000785	0.001995	0.002252	0.017377	0.025911	0.025572	0.028193	0.02993	0.03286	0.09172	0.9073	1	1	0.00822	0.011719	0.017105	0.0547	0.06564	0.13243	0.16466	0.3287	0.4267	0.395	0.5556	0.7181	0.9178	0.003832	0.7859	1	0.9965	0.9997	0.007027	0.17821	1	0.005064	0.006918	0.008512	0.008776	0.008634	0.009342	0.010895	0.015023	0.01787	0.024344	0.5893	0.9993	0.9999
P-1209	0	0	0	0	0	0	0	0	0	0	0	0.001688	0.8083	1	1	0	0	0	0	0	0	0	0	0	4e-06	2.2e-05	2.4e-05	0.03356	0	4.1e-05	0.18441	0.01042	0.04796	0	0	0.7329	0	0	0	0	0	0	0	0	0	2.5e-05	0.03266	0.17915	0.7289
P-1210	0	0	0	0	0	0	0	0	0	0	0	0.007478	0.8687	1	1	0	0	0	0	0	0.000141	0.000128	0.002792	0.007594	0.01408	0.03965	0.07359	0.3475	0	0.11515	0.9832	0.7423	0.9027	0	0.00024	0.9994	0	0	0	0	0	0	0	0	0	0.00012	0.34	0.9313	0.9889
JQ02	0	0	0	0	0	0	0	0	0	0	0	0.009917	0.8793	1	1	0	0	0	0	0	0.000169	0.000145	0.003282	0.00954	0.022834	0.06922	0.1345	0.5102	0	0.2138	0.9995	0.9357	0.9899	0	0.000263	1	0	0	0	0	0	0	0	0	0	0.000171	0.4209	0.9877	0.9984
P-1214	0	0	0	0	0	0	0	0	0	0	0	0.01208	0.8822	1	1	0	0	0	0	3e-06	0.000959	0.00103	0.017851	0.044	0.06002	0.13587	0.23366	0.5878	0	0.3189	0.9979	0.9227	0.9808	0	0.001789	1	0	0	0	0	0	0	0	0	0	0.000221	0.438	0.9829	0.9975
JQ10	0	0	0	0	0	0	0	0	0	0	0	0.013753	0.8873	1	1	0	0	0	0	0	0.000888	0.000779	0.018465	0.04966	0.07306	0.17027	0.29843	0.6934	0	0.408	0.9999	0.9783	0.9973	0	0.001492	1	0	0	0	0	0	0	0	0	0	0.00025	0.475	0.9959	0.9995
End El Paraiso	0	0	0	0	0	0	0	0	0	0	0	0.00109	0.7516	0.9894	0.9944	0	0	0	0	0	0	0	0	0	1e-06	9e-06	1e-05	0.01836	0	1.4e-05	0.07021	0.003114	0.015327	0	0	0.5101	0	0	0	0	0	0	0	0	0	1.5e-05	0.012946	0.07507	0.5601
Start Bahia Seca	0	0.000178	0.000331	0.000752	0.000867	0.005201	0.007265	0.007181	0.007781	0.008166	0.00885	0.024954	0.8719	1	1	0.002685	0.003712	0.005087	0.013319	0.01528	0.027126	0.03239	0.05824	0.07436	0.07358	0.1121	0.15571	0.3915	0.001316	0.19212	0.9789	0.7191	0.8857	0.002336	0.03457	0.9992	0.001785	0.002349	0.002829	0.002891	0.00286	0.00306	0.00347	0.004606	0.005348	0.006844	0.356	0.9214	0.987
UGa-6129	0	0	0	0	0	0	0	0	0	0	0	0.004966	0.8566	1	1	0	0	0	0	0	1.8e-05	1.6e-05	0.000344	0.000951	0.002635	0.009101	0.017327	0.19455	0	0.030089	0.9423	0.4837	0.7496	0	3.2e-05	0.997	0	0	0	0	0	0	0	0	0	7.6e-05	0.24644	0.8363	0.9713
UGa-6023	0	0	0	0	0	0	0	0	0	0	0	0.003973	0.8494	1	1	0	0	0	0	0	0	0	8e-06	3.4e-05	0.000406	0.002097	0.003763	0.13369	0	0.007547	0.8798	0.3257	0.6155	0	0	0.9912	0	0	0	0	0	0	0	0	0	6.1e-05	0.19343	0.7497	0.9535
UGa-6025	0	0	0	0	0	0	0	0	0	0	0	0.003463	0.8443	1	1	0	0	0	0	0	0	1e-06	3e-06	1.2e-05	0.000175	0.001048	0.001897	0.10809	0	0.003762	0.7947	0.22687	0.4935	0	0	0.9801	0	0	0	0	0	0	0	0	0	4.9e-05	0.1582	0.6634	0.9334
UGa-6022	0	0	0	0	0	0	0	0	0	0	0	0.002644	0.8332	1	1	0	0	0	0	0	0	0	0	0	1.4e-05	0.00014	0.000212	0.06947	0	0.00043	0.5776	0.08197	0.26669	0	0	0.9323	0	0	0	0	0	0	0	0	0	3.9e-05	0.09731	0.475	0.8793
End Bahia Seca	0	0	0	0	0	0	0	0	0	0	0	0.001886	0.8038	0.9964	0.9981	0	0	0	0	0	0	0	0	0	2e-06	4e-05	5.5e-05	0.04426	0	0.000125	0.3171	0.031534	0.11869	0	0	0.7714	0	0	0	0	0	0	0	0	0	3e-05	0.05325	0.27468	0.7537
Start Taukachi-Konkan	0	0	0	0	0	0	0	0	0	0	0	0.004303	0.8536	1	1	0	0	0	0	0	5e-06	1e-06	4.9e-05	0.000115	0.000588	0.002816	0.005189	0.15297	0	0.009858	0.9481	0.4096	0.7215	0	3e-06	0.9981	0	0	0	0	0	0	0	0	0	6.3e-05	0.22274	0.8215	0.9696
UGa-7041	0	0	0	0	0	0	0	0	0	0	0	0.003594	0.847	1	1	0	0	0	0	0	0	0	1e-06	7e-06	0.000144	0.00088	0.00144	0.11412	0	0.003072	0.8684	0.25714	0.5683	0	0	0.9904	0	0	0	0	0	0	0	0	0	5.4e-05	0.1741	0.7226	0.9481
UGa-7037	0	0	0	0	0	0	0	0	0	0	0	0.00361	0.847	1	1	0	0	0	0	0	0	0	2e-06	5e-06	0.000135	0.000888	0.001479	0.11419	0	0.003064	0.8689	0.25734	0.5693	0	0	0.9905	0	0	0	0	0	0	0	0	0	5.2e-05	0.1743	0.7232	0.9481
UGa-7040	0	0	0	0	0	0	0	0	0	0	0	0.003309	0.8435	1	1	0	0	0	0	0	0	0	0	0	4.7e-05	0.00032	0.000492	0.09709	0	0.001055	0.8173	0.18329	0.4818	0	0	0.9857	0	0	0	0	0	0	0	0	0	4.8e-05	0.14963	0.6658	0.9359
UGa-7042	0	0	0	0	0	0	0	0	0	0	0	0.00215	0.8244	1	1	0	0	0	0	0	0	0	0	0	1e-06	1.1e-05	1e-05	0.04874	0	1.7e-05	0.3495	0.021958	0.10585	0	0	0.8718	0	0	0	0	0	0	0	0	0	3.3e-05	0.05766	0.30733	0.8249
UGa-7038	0	0	0	0	0	0	0	0	0	0	0	0.002083	0.8229	1	1	0	0	0	0	0	0	0	0	0	0	4e-06	3e-06	0.04523	0	3e-06	0.30494	0.01381	0.07746	0	0	0.8606	0	0	0	0	0	0	0	0	0	3.3e-05	0.05099	0.27553	0.8146
UGa-7039	0	0	0	0	0	0	0	0	0	0	0	0.001702	0.8134	1	1	0	0	0	0	0	0	0	0	0	0	0	0	0.03249	0	0	0.13917	0.000636	0.013025	0	0	0.7683	0	0	0	0	0	0	0	0	0	2.6e-05	0.027873	0.15847	0.7497
Beta-535191	0	0	0	0	0	0	0	0	0	0	0	0.003085	0.8413	1	1	0	0	0	0	0	0	0	0	0	1.7e-05	0.000151	0.000211	0.0869	0	0.000445	0.7783	0.13664	0.4211	0	0	0.9825	0	0	0	0	0	0	0	0	0	4.6e-05	0.13344	0.6248	0.9272
Beta-427589	0	0	0	0	0	0	0	0	0	0	0	0.002754	0.8366	1	1	0	0	0	0	0	0	0	0	0	4e-06	3.9e-05	3.7e-05	0.07146	0	5.9e-05	0.6577	0.0735	0.29265	0	0	0.9677	0	0	0	0	0	0	0	0	0	4.1e-05	0.10361	0.5253	0.9043
Beta-427588	0	0	0	0	0	0	0	0	0	0	0	0.002694	0.8355	1	1	0	0	0	0	0	0	0	0	0	2e-06	2.7e-05	2.4e-05	0.06825	0	3e-05	0.6257	0.06237	0.26357	0	0	0.9626	0	0	0	0	0	0	0	0	0	3.9e-05	0.09733	0.5008	0.8981
Beta-427587	0	0	0	0	0	0	0	0	0	0	0	0.002615	0.8346	1	1	0	0	0	0	0	0	0	0	0	2e-06	2e-05	1.3e-05	0.06569	0	1.8e-05	0.5949	0.054	0.23932	0	0	0.9573	0	0	0	0	0	0	0	0	0	4e-05	0.09207	0.4782	0.8921
Beta-535190	0	0	0	0	0	0	0	0	0	0	0	0.00242	0.831	1	1	0	0	0	0	0	0	0	0	0	1e-06	1.2e-05	7e-06	0.05831	0	6e-06	0.4916	0.03465	0.16964	0	0	0.9329	0	0	0	0	0	0	0	0	0	3.6e-05	0.07659	0.4054	0.8695
Beta-535192	0	0	0	0	0	0	0	0	0	0	0	0.002561	0.8335	1	1	0	0	0	0	0	0	0	0	0	1e-06	1.3e-05	9e-06	0.06332	0	8e-06	0.5645	0.04731	0.21693	0	0	0.951	0	0	0	0	0	0	0	0	0	4e-05	0.08693	0.4565	0.8858
Beta-477229	0	0	0	0	0	0	0	0	0	0	0	0.002159	0.8253	1	1	0	0	0	0	0	0	0	0	0	0	6e-06	2e-06	0.04815	0	2e-06	0.3415	0.015036	0.0868	0	0	0.8849	0	0	0	0	0	0	0	0	0	3.5e-05	0.05608	0.30131	0.8312
Beta-477227	0	0	0	0	0	0	0	0	0	0	0	0.002969	0.8396	1	1	0	0	0	0	0	0	0	0	0	8e-06	0.000108	0.000125	0.08077	0	0.000241	0.7349	0.11005	0.3711	0	0	0.9777	0	0	0	0	0	0	0	0	0	4.7e-05	0.12173	0.5881	0.9189
Beta- 477228	0	0	0	0	0	0	0	0	0	0	0	0.002744	0.8366	1	1	0	0	0	0	0	0	0	0	0	5e-06	4.4e-05	3.7e-05	0.07144	0	6.7e-05	0.6568	0.0735	0.29232	0	0	0.9674	0	0	0	0	0	0	0	0	0	4.3e-05	0.10368	0.525	0.904
End Taukachi-Konkan	0	0	0	0	0	0	0	0	0	0	0	0.001566	0.8083	1	1	0	0	0	0	0	0	0	0	0	0	0	0	0.028626	0	0	0.11088	0.000424	0.009772	0	0	0.7225	0	0	0	0	0	0	0	0	0	2.5e-05	0.022116	0.13255	0.7198
Start Huacaloma	0	0.008947	0.015278	0.03213	0.03561	0.11834	0.14031	0.13966	0.14544	0.14844	0.15442	0.20084	0.8756	1	1	0.07868	0.09706	0.11627	0.18258	0.19205	0.23341	0.2514	0.2994	0.319	0.30815	0.3436	0.3772	0.4762	0.04709	0.3942	0.7291	0.5617	0.6346	0.07232	0.25638	0.9155	0.06195	0.07484	0.08363	0.0848	0.08398	0.08756	0.09436	0.11115	0.12092	0.13412	0.3884	0.7006	0.907
TK341a	0	0	0	0	0	0	0	0	0	0	0	0.001456	0.7977	1	1	0	0	0	0	0	0	0	0	0	1e-06	1.2e-05	9e-06	0.027157	0	2.2e-05	0.12857	0.006496	0.030866	0	0	0.6551	0	0	0	0	0	0	0	0	0	2.3e-05	0.023001	0.13008	0.6743
End Huacaloma	0	0	0	0	0	0	0	0	0	0	0	0.000613	0.6212	0.9144	0.9507	0	0	0	0	0	0	0	0	0	0	2e-06	1e-06	0.008752	0	2e-06	0.021985	0.000733	0.003955	0	0	0.30179	0	0	0	0	0	0	0	0	0	7e-06	0.004231	0.025506	0.3753
Start Gramalote	0	0.000204	0.000354	0.000805	0.000881	0.004135	0.005409	0.005348	0.005707	0.005921	0.006312	0.013102	0.8325	1	1	0.002373	0.003138	0.004054	0.008549	0.00939	0.013913	0.015847	0.023258	0.027075	0.026155	0.03393	0.04233	0.11891	0.001276	0.04817	0.4564	0.1547	0.25483	0.002125	0.016574	0.8754	0.001707	0.002164	0.002504	0.002555	0.002531	0.002688	0.002985	0.003763	0.004264	0.005089	0.11671	0.4132	0.8428
Beta-321940	0	0	0	0	0	0	0	0	0	0	0	0.001528	0.8059	1	1	0	0	0	0	0	0	0	0	0	0	0	0	0.027553	0	0	0.10639	0.00072	0.010845	0	0	0.7029	0	0	0	0	0	0	0	0	0	2.4e-05	0.020419	0.12444	0.707
Beta-321943	0	0	0	0	0	0	0	0	0	0	0	0.001743	0.8131	1	1	0	0	0	0	0	0	0	0	0	0	0	1e-06	0.03475	0	2e-06	0.18811	0.005518	0.03653	0	0	0.7679	0	0	0	0	0	0	0	0	0	2.8e-05	0.03251	0.18625	0.7519
Beta-321945	0	0	0	0	0	0	0	0	0	0	0	0.001534	0.806	1	1	0	0	0	0	0	0	0	0	0	0	0	0	0.027599	0	0	0.10642	0.000706	0.010775	0	0	0.7032	0	0	0	0	0	0	0	0	0	2.6e-05	0.020494	0.12434	0.7071
End Gramalote	0	0	0	0	0	0	0	0	0	0	0	0.001104	0.7675	0.9934	0.9965	0	0	0	0	0	0	0	0	0	0	0	0	0.017242	0	0	0.04121	0.000123	0.003326	0	0	0.5308	0	0	0	0	0	0	0	0	0	1.8e-05	0.008369	0.05585	0.5812
Start Chavin	0	1e-05	2e-05	4.9e-05	4.9e-05	0.000219	0.000302	0.000293	0.000316	0.000326	0.000346	0.000799	0.569	1	1	0.00013	0.000172	0.00022	0.000458	0.000512	0.000739	0.000834	0.001148	0.001303	0.001232	0.001531	0.001828	0.004612	7.4e-05	0.001993	0.007201	0.004089	0.005285	0.000119	0.000868	0.12524	9.9e-05	0.000119	0.000138	0.00014	0.000144	0.00015	0.000168	0.000205	0.000228	0.000276	0.002681	0.007025	0.21997
AA69448	0	0	0	0	0	0	0	0	0	0	0	7.6e-05	0.31606	0.8327	0.9406	0	0	0	0	0	0	0	0	0	0	0	0	0.000395	0	0	0	0	0	0	0	0.04699	0	0	0	0	0	0	0	0	0	1e-06	0	0	0.10982
AA69449	0	0	0	0	0	0	0	0	0	0	0	8.9e-05	0.377	0.9249	0.9714	0	0	0	0	0	0	0	0	0	0	0	0	0.00049	0	0	0	0	0	0	0	0.05503	0	0	0	0	0	0	0	0	0	1e-06	0	0	0.12446
AA69446	0	0	0	0	0	0	0	0	0	0	0	0.000115	0.4671	0.9964	0.9989	0	0	0	0	0	0	0	0	0	0	0	0	0.000683	0	0	0	0	0	0	0	0.07142	0	0	0	0	0	0	0	0	0	1e-06	0	0	0.15273
AA69447	0	0	0	0	0	0	0	0	0	0	0	0.000134	0.5082	0.9999	1	0	0	0	0	0	0	0	0	0	0	0	0	0.000834	0	0	0	0	0	0	0	0.08223	0	0	0	0	0	0	0	0	0	1e-06	0	0	0.16971
End Chavin	0	0	0	0	0	0	0	0	0	0	0	5.8e-05	0.22049	0.6111	0.8037	0	0	0	0	0	0	0	0	0	0	0	0	0.000269	0	0	0	0	0	0	0	0.03455	0	0	0	0	0	0	0	0	0	1e-06	0	0	0.08434
End Kotosh Religious Tradition	0	0	0	0	0	0	0	0	0	0	0	0	0	0	0	0	0	0	0	0	0	0	0	0	0	0	0	0	0	0	0	0	0	0	0	0	0	0	0	0	0	0	0	0	0	0	0	0	0
[truncated: 125 more columns]

## Sheet: Model C
		Results of order command . Cells show probability that events in columns occurred prior to events in corresponding row
Order	Start Kotosh Religious Tradition	Start Huaricanga	AA102184	AA102185	AA102179	AA84560	AA102181	AA102180	AA10282	AA84551	AA84552	End Huaricanga	Start Huaynuna	UGa-4522	UGa-5616	UGa-4520	UGa-5619	UGa-5612	UGa-4521	UGa-5631	UGa-5617	UGa-5613	UGa-5615	UGa-5614	UGa-5618	UGa-5632	End Huaynuna	Start Piruro	Gif-2302	Gif-2303	Gif-2304	Gif-2305	Gif-2306	Gif-7668	Gif-7669	Gif-7670	Gif-7986	Gif-7987	Gif-7988	Gif-7989	Gif-7990	End Piruro	Start Acshicupoto	PRI-14-108-71	D-AMS 021271	D-AMS 014375	D-AMS 014376	D-AMS 021270	Beta - 423709
Start Kotosh Religious Tradition	0	1	1	1	1	1	1	1	1	1	1	1	1	1	1	1	1	1	1	1	1	1	1	1	1	1	1	1	1	1	1	1	1	1	1	1	1	1	1	1	1	1	1	1	1	1	1	1	1
Start Huaricanga	0	0	1	1	1	1	1	1	1	1	1	1	0.9961	1	0.9999	1	1	1	1	1	1	1	1	1	1	1	1	0.9781	1	1	0.9997	1	1	1	1	1	1	1	0.9995	1	1	1	0.9976	1	1	1	1	1	1
AA102184	0	0	0	0.889	0.925	1	1	1	1	1	1	1	0.9915	1	0.9998	1	1	1	1	1	1	1	1	1	1	1	1	0.9545	1	1	0.9993	1	1	1	1	1	1	1	0.9984	1	1	1	0.994	1	1	1	1	1	1
AA102185	0	0	0.11103	0	0.5791	0.9999	1	1	1	1	1	1	0.9578	0.999	0.9975	0.9999	1	1	1	1	1	1	1	1	1	1	1	0.8293	0.9999	0.9992	0.9934	0.9999	0.9999	1	1	1	1	1	0.9707	1	1	1	0.9511	0.9986	0.9993	0.9994	0.9994	0.9995	0.9996
AA102179	0	0	0.07503	0.4209	0	0.9999	1	1	1	1	1	1	0.9474	0.9986	0.9967	0.9999	1	1	1	1	1	1	1	1	1	1	1	0.7953	0.9998	0.9989	0.9914	0.9999	0.9998	1	1	1	1	1	0.9603	1	1	1	0.9358	0.9978	0.999	0.9991	0.9991	0.9992	0.9994
AA84560	0	0	0	5.6e-05	9.5e-05	0	0.8427	0.8497	0.9178	0.9322	0.9767	1	0.06537	0.17428	0.5858	0.4499	0.9974	0.9974	0.9995	1	1	0.9999	1	1	1	1	1	0.018282	0.7595	0.5153	0.568	0.8572	0.8023	1	1	1	1	0.9976	0.05924	1	1	1	0.011073	0.02605	0.04178	0.04535	0.04219	0.05776	0.10051
AA102181	0	0	0	1e-06	1e-06	0.15734	0	0.4908	0.5994	0.6463	0.7406	1	0.008629	0.03878	0.4159	0.16556	0.92	0.9378	0.9869	0.9989	1	0.9978	0.9995	1	1	1	1	0.001025	0.5851	0.3246	0.4282	0.7129	0.6385	1	1	1	1	0.9757	0.007525	0.9993	1	1	0.000108	0.000241	0.000535	0.000635	0.000513	0.001416	0.007149
AA102180	0	0	0	0	0	0.15028	0.5092	0	0.6137	0.6625	0.7596	1	0.007854	0.03617	0.4183	0.16125	0.9293	0.9448	0.9887	0.9991	1	0.9981	0.9996	1	1	1	1	0.000853	0.5911	0.3269	0.4307	0.719	0.6443	1	1	1	1	0.9782	0.006818	0.9995	1	1	8e-06	1.4e-05	0.00012	0.000164	9.9e-05	0.000682	0.005506
AA10282	0	0	0	0	0	0.08219	0.4006	0.3863	0	0.5575	0.6644	1	0.00417	0.019551	0.3774	0.10467	0.8969	0.9198	0.9834	0.9987	1	0.9972	0.9994	1	0.9999	1	1	0.000412	0.5413	0.282	0.3965	0.674	0.5957	1	1	1	1	0.9695	0.003564	0.9992	1	1	1e-06	2e-06	3.9e-05	6e-05	3e-05	0.000348	0.002796
AA84551	0	0	0	0	0	0.06781	0.3537	0.3375	0.4425	0	0.6045	1	0.003459	0.01656	0.3591	0.08975	0.8694	0.8986	0.9782	0.9979	1	0.9964	0.9991	1	0.9999	1	1	0.000388	0.5151	0.26276	0.3803	0.6486	0.5697	1	1	1	1	0.9625	0.003013	0.9987	1	1	1.1e-05	2.7e-05	9.9e-05	0.00012	9.3e-05	0.000374	0.002518
AA84552	0	0	0	0	0	0.023267	0.25939	0.24043	0.3356	0.3955	0	1	0.001107	0.005678	0.3217	0.05017	0.8236	0.8633	0.9693	0.9965	1	0.9949	0.9986	1	0.9999	1	1	9.4e-05	0.4657	0.22256	0.348	0.6015	0.521	1	1	1	1	0.95	0.000926	0.9977	1	1	2e-06	2e-06	1.5e-05	2.1e-05	1.1e-05	8.8e-05	0.000685
End Huaricanga	0	0	0	0	0	0	0	0	0	0	0	0	1.2e-05	0.00024	0.16428	0.006407	0.4088	0.4911	0.7599	0.8562	0.9417	0.907	0.9309	0.9558	0.9601	0.977	0.9872	0	0.22193	0.08351	0.19579	0.3254	0.26137	0.9805	0.9967	0.9939	0.9956	0.7496	1.4e-05	0.8698	0.9894	0.9981	0	0	0	0	0	0	0
Start Huaynuna	0	0.00386	0.0085	0.04215	0.05258	0.9346	0.9914	0.9921	0.9958	0.9965	0.9989	1	0	1	1	1	1	1	1	1	1	1	1	1	1	1	1	0.26008	0.9371	0.8452	0.831	0.9672	0.951	1	1	1	1	0.9998	0.4857	1	1	1	0.25051	0.4186	0.557	0.5778	0.5642	0.6189	0.7136
UGa-4522	0	3e-06	1.3e-05	0.001001	0.001447	0.8257	0.9612	0.9638	0.9804	0.9834	0.9943	0.9998	0	0	0.803	0.7962	0.9994	0.9994	0.9999	1	1	1	1	1	1	1	1	0.09788	0.8782	0.7213	0.7236	0.9331	0.9029	1	1	1	1	0.9993	0.25734	1	1	1	0.0579	0.14992	0.27337	0.29609	0.27999	0.347	0.4703
UGa-5616	0	7.9e-05	0.000237	0.002496	0.003305	0.4142	0.5841	0.5817	0.6226	0.6409	0.6783	0.8357	0	0.19702	0	0.3855	0.7981	0.8238	0.9132	0.9461	0.9818	0.9681	0.9774	0.9882	0.9896	0.9968	1	0.04799	0.6104	0.4332	0.4917	0.6961	0.6461	0.9975	1	0.9999	1	0.9102	0.11803	0.9515	0.9991	1	0.03397	0.07396	0.1227	0.13153	0.12508	0.15241	0.20484
UGa-4520	0	0	0	9.6e-05	0.000141	0.5501	0.8344	0.8387	0.8953	0.9103	0.9498	0.9936	0	0.2038	0.6145	0	0.987	0.9894	0.9977	0.9998	1	0.9996	0.9999	1	1	1	1	0.029221	0.7684	0.5422	0.5881	0.8587	0.8075	1	1	1	1	0.995	0.09217	0.9999	1	1	0.014306	0.03894	0.07709	0.08541	0.07867	0.10836	0.17361
UGa-5619	0	0	0	0	0	0.00264	0.07997	0.0707	0.10312	0.13056	0.17643	0.5912	0	0.000611	0.20193	0.013034	0	0.5868	0.8587	0.9526	0.9976	0.9705	0.9871	0.9992	0.9974	1	1	4e-06	0.2783	0.11187	0.23435	0.3948	0.3233	1	1	1	1	0.8389	7.1e-05	0.9629	1	1	0	0	1e-06	0	0	3e-06	1.9e-05
UGa-5612	0	0	0	0	0	0.002646	0.06225	0.05522	0.08017	0.10142	0.13673	0.5089	0	0.000554	0.17615	0.010589	0.4132	0	0.7971	0.9083	0.9907	0.9498	0.9738	0.9966	0.9933	0.9998	1	5e-06	0.2372	0.0923	0.20784	0.3438	0.27787	0.9999	1	1	1	0.7862	9.4e-05	0.9239	0.9999	1	0	0	1e-06	1e-06	0	6e-06	4.1e-05
UGa-4521	0	0	0	0	0	0.000473	0.013121	0.011344	0.01663	0.02179	0.030738	0.24009	0	0.000118	0.08681	0.002287	0.1413	0.20287	0	0.6374	0.8994	0.8109	0.8663	0.9467	0.9485	0.9936	1	1e-06	0.10096	0.03204	0.11304	0.16478	0.12365	0.9956	1	1	1	0.5341	1.9e-05	0.6711	0.998	1	0	0	0	0	1e-06	2e-06	8e-06
UGa-5631	0	0	0	0	0	2.5e-05	0.001073	0.000857	0.001296	0.002056	0.003493	0.1438	0	6e-06	0.0539	0.000222	0.0474	0.09172	0.3626	0	0.8479	0.7397	0.8097	0.9194	0.9245	0.9911	1	0	0.05212	0.012504	0.07711	0.09681	0.06765	0.9943	1	1	1	0.4189	1e-06	0.54	0.9973	1	0	0	0	0	0	0	0
UGa-5617	0	0	0	0	0	0	0	0	0	3e-06	8e-06	0.05831	0	0	0.018195	1e-06	0.002416	0.009282	0.10061	0.15209	0	0.4626	0.5412	0.6544	0.748	0.9239	1	0	0.010942	0.001637	0.03192	0.024972	0.015358	0.9454	1	0.9995	1	0.1689	0	0.17975	0.9819	1	0	0	0	0	0	0	0
UGa-5613	0	0	0	0	0	0.000121	0.002163	0.001912	0.002795	0.003619	0.005145	0.09304	0	2.4e-05	0.03191	0.000387	0.029491	0.05016	0.18913	0.26031	0.5374	0	0.5638	0.646	0.7279	0.8721	1	0	0.029548	0.007569	0.04755	0.054	0.03786	0.898	1	0.9974	0.9996	0.24098	3e-06	0.28651	0.9666	1	0	0	0	1e-06	0	2e-06	2e-06
UGa-5615	0	0	0	0	0	1.7e-05	0.0005	0.000423	0.000627	0.000895	0.001356	0.06913	0	4e-06	0.022622	9.2e-05	0.012911	0.026169	0.13367	0.19029	0.4588	0.4362	0	0.5774	0.6776	0.8422	1	0	0.017744	0.003957	0.03612	0.03581	0.023841	0.8756	1	0.9971	0.9996	0.18647	0	0.21391	0.9595	1	0	0	0	0	0	0	0
UGa-5614	0	0	0	0	0	0	0	0	0	0	0	0.04423	0	0	0.011753	0	0.0008	0.003411	0.0533	0.08057	0.3456	0.354	0.4226	0	0.6377	0.8465	1	0	0.005688	0.000777	0.022739	0.014125	0.00843	0.8858	1	0.9987	0.9999	0.10975	0	0.0994	0.9641	1	0	0	0	0	0	0	0
UGa-5618	0	0	0	0	0	2e-06	4.7e-05	3.8e-05	5.6e-05	8e-05	0.000137	0.0399	0	0	0.010399	7e-06	0.002624	0.006696	0.05149	0.07553	0.25196	0.27215	0.3224	0.3623	0	0.6941	1	0	0.006258	0.001055	0.019744	0.014	0.008717	0.7554	0.9998	0.9906	0.9982	0.09217	0	0.089	0.9179	1	0	0	0	0	0	0	0
UGa-5632	0	0	0	0	0	0	0	0	0	0	0	0.02303	0	0	0.00321	0	3.6e-05	0.000177	0.006446	0.008876	0.07611	0.12789	0.15776	0.15354	0.30593	0	1	0	0.000949	8.6e-05	0.009381	0.002931	0.001539	0.6125	0.9997	0.982	0.9966	0.03017	0	0.013243	0.8667	1	0	0	0	0	0	0	0
End Huaynuna	0	0	0	0	0	0	0	0	0	0	0	0.01279	0	0	0	0	0	0	0	0	0	0	0	0	0	0	0	0	0.00018	1.1e-05	0.003715	0.000631	0.000295	0.28781	0.9537	0.8365	0.9127	0.007564	0	0.001316	0.6464	0.9809	0	0	0	0	0	0	0
Start Piruro	0	0.021907	0.04546	0.1707	0.20473	0.9817	0.999	0.9991	0.9996	0.9996	0.9999	1	0.7399	0.9021	0.952	0.9708	1	1	1	1	1	1	1	1	1	1	1	0	1	1	1	1	1	1	1	1	1	1	1	1	1	1	0.5571	0.7351	0.8282	0.8386	0.8324	0.8579	0.8998
Gif-2302	0	2e-06	4e-06	0.000147	0.000223	0.24046	0.4149	0.4089	0.4587	0.4849	0.5343	0.7781	0.06289	0.12182	0.3896	0.23163	0.7217	0.7628	0.899	0.9479	0.9891	0.9705	0.9823	0.9943	0.9937	0.9991	0.9998	0	0	0.31126	0.3968	0.6017	0.5414	0.9993	1	1	1	0.8917	0.04688	0.9545	0.9997	1	0.015398	0.03744	0.06066	0.06469	0.06179	0.07472	0.10096
Gif-2303	0	9e-06	2.1e-05	0.000759	0.001071	0.4847	0.6754	0.6731	0.718	0.7372	0.7774	0.9165	0.15483	0.27867	0.5668	0.4578	0.8881	0.9077	0.968	0.9875	0.9984	0.9924	0.996	0.9992	0.9989	0.9999	1	0	0.6887	0	0.5528	0.7746	0.7252	0.9999	1	1	1	0.9619	0.11876	0.9897	1	1	0.04205	0.09916	0.15783	0.16768	0.16079	0.19074	0.24899
Gif-2304	0	0.000277	0.000741	0.006639	0.00858	0.432	0.5718	0.5693	0.6035	0.6197	0.652	0.8042	0.169	0.2764	0.5083	0.4119	0.7656	0.7922	0.887	0.9229	0.9681	0.9525	0.9639	0.9773	0.9803	0.9906	0.9963	0	0.6032	0.4472	0	0.6803	0.6349	0.9927	0.9999	0.9993	0.9998	0.8861	0.13311	0.929	0.9971	1	0.06596	0.12417	0.17927	0.18819	0.18219	0.20762	0.25597
Gif-2305	0	1e-06	1e-06	5.8e-05	8.7e-05	0.14275	0.28712	0.28101	0.326	0.3514	0.3985	0.6746	0.03283	0.06693	0.30391	0.14129	0.6052	0.6562	0.8352	0.9032	0.975	0.946	0.9642	0.9859	0.986	0.9971	0.9994	0	0.3983	0.22538	0.3197	0	0.439	0.998	1	1	1	0.8316	0.024123	0.9138	0.9992	1	0.007452	0.018421	0.030215	0.03233	0.030783	0.03782	0.05263
Gif-2306	0	0	1e-06	9.6e-05	0.000161	0.19768	0.3615	0.3557	0.4043	0.4303	0.479	0.7386	0.04901	0.09708	0.3539	0.19246	0.6767	0.7221	0.8763	0.9324	0.9846	0.9621	0.9762	0.9916	0.9913	0.9985	0.9997	0	0.4586	0.27482	0.3651	0.561	0	0.999	1	1	1	0.8699	0.03643	0.9407	0.9996	1	0.011656	0.028567	0.04632	0.04959	0.04727	0.05748	0.07889
Gif-7668	0	0	0	0	0	0	0	0	0	0	0	0.019458	0	0	0.002482	0	1.3e-05	8e-05	0.004412	0.005692	0.05458	0.10199	0.1244	0.11418	0.24455	0.3875	0.7122	0	0.000651	5.2e-05	0.007259	0.002038	0.001039	0	0.9991	0.9637	0.992	0.021342	0	0.008374	0.8131	1	0	0	0	0	0	0	0
Gif-7669	0	0	0	0	0	0	0	0	0	0	0	0.003257	0	0	2e-06	0	0	0	0	0	1e-06	3.4e-05	4.1e-05	5e-06	0.000205	0.000343	0.04635	0	0	0	6.1e-05	1e-06	0	0.000922	0	0.08237	0.23433	8e-06	0	0	0.05629	1	0	0	0	0	0	0	0
Gif-7670	0	0	0	0	0	0	0	0	0	0	0	0.006052	0	0	6.8e-05	0	0	0	2.5e-05	2.3e-05	0.000462	0.002555	0.002911	0.001266	0.009435	0.018007	0.16348	0	7e-06	1e-06	0.000652	4.5e-05	1.9e-05	0.03626	0.9176	0	0.7398	0.000438	0	4.2e-05	0.30876	1	0	0	0	0	0	0	0
Gif-7986	0	0	0	0	0	0	0	0	0	0	0	0.004385	0	0	1.4e-05	0	0	0	2e-06	1e-06	3.4e-05	0.000402	0.000409	9.5e-05	0.001776	0.00337	0.08731	0	2e-06	0	0.00025	4e-06	4e-06	0.007957	0.7657	0.26019	0	6.5e-05	0	3e-06	0.15897	1	0	0	0	0	0	0	0
Gif-7987	0	0	0	0	0	0.00244	0.024301	0.021758	0.03047	0.03753	0.05005	0.25043	0.000158	0.000662	0.08982	0.00499	0.16105	0.21383	0.4659	0.5811	0.8311	0.759	0.8135	0.8902	0.9078	0.9698	0.9924	0	0.10834	0.03815	0.1139	0.16836	0.13009	0.9787	1	0.9996	0.9999	0	0.000135	0.6117	0.9926	1	1.5e-05	3.3e-05	5.8e-05	6e-05	5.9e-05	9.4e-05	0.000196
Gif-7988	0	0.000525	0.001578	0.029339	0.03966	0.9408	0.9925	0.9932	0.9964	0.997	0.9991	1	0.5143	0.7427	0.882	0.9078	0.9999	0.9999	1	1	1	1	1	1	1	1	1	0	0.9531	0.8812	0.8669	0.9759	0.9636	1	1	1	1	0.9999	0	1	1	1	0.26542	0.4349	0.5767	0.5969	0.5834	0.6393	0.7343
Gif-7989	0	0	0	0	0	1.3e-05	0.000668	0.000514	0.000808	0.001318	0.002338	0.1302	0	3e-06	0.04855	0.000141	0.03711	0.07615	0.3289	0.46	0.8202	0.7135	0.7861	0.9006	0.911	0.9868	0.9987	0	0.0455	0.010317	0.07097	0.08616	0.05928	0.9916	1	1	1	0.3883	0	0	0.9965	1	0	0	0	0	0	0	0
Gif-7990	0	0	0	0	0	0	0	0	0	0	0	0.010625	0	0	0.000901	0	3.9e-05	0.000119	0.00197	0.002667	0.018128	0.03341	0.0405	0.03594	0.08207	0.13333	0.3536	0	0.000272	3.3e-05	0.002902	0.000758	0.000422	0.1869	0.9437	0.6912	0.841	0.007423	0	0.003542	0	1	0	0	0	0	0	0	0
End Piruro	0	0	0	0	0	0	0	0	0	0	0	0.001928	0	0	0	0	0	0	0	0	0	1e-06	0	0	7e-06	9e-06	0.019058	0	0	0	0	0	0	0	0	0	0	0	0	0	0	0	0	0	0	0	0	0	0
Start Acshicupoto	0	0.002403	0.005966	0.04895	0.06425	0.9889	0.9999	1	1	1	1	1	0.7495	0.9421	0.966	0.9857	1	1	1	1	1	1	1	1	1	1	1	0.4429	0.9846	0.9579	0.934	0.9925	0.9883	1	1	1	1	1	0.7346	1	1	1	0	1	1	1	1	1	1
PRI-14-108-71	0	0	0	0.001433	0.002201	0.974	0.9998	1	1	1	1	1	0.5814	0.8501	0.926	0.9611	1	1	1	1	1	1	1	1	1	1	1	0.26486	0.9626	0.9008	0.8758	0.9816	0.9714	1	1	1	1	1	0.5651	1	1	1	0	0	0.7359	0.7575	0.7447	0.7925	0.8621
D-AMS 021271	0	0	0	0.000663	0.000979	0.9582	0.9995	0.9999	1	0.9999	1	1	0.443	0.7266	0.8773	0.9229	1	1	1	1	1	1	1	1	1	1	1	0.17177	0.9393	0.8422	0.8207	0.9698	0.9537	1	1	1	1	0.9999	0.4233	1	1	1	0	0.2641	0	0.533	0.5116	0.5976	0.7327
D-AMS 014375	0	0	0	0.000626	0.000931	0.9546	0.9994	0.9998	0.9999	0.9999	1	1	0.4222	0.7039	0.8685	0.9146	1	1	1	1	1	1	1	1	1	1	1	0.16138	0.9353	0.8323	0.8118	0.9677	0.9504	1	1	1	1	0.9999	0.4031	1	1	1	0	0.24252	0.467	0	0.4782	0.567	0.709
D-AMS 014376	0	0	0	0.000642	0.000945	0.9578	0.9995	0.9999	1	0.9999	1	1	0.4358	0.72	0.8749	0.9213	1	1	1	1	1	1	1	1	1	1	1	0.16764	0.9382	0.8392	0.8178	0.9692	0.9527	1	1	1	1	0.9999	0.4166	1	1	1	0	0.25532	0.4884	0.5218	0	0.5887	0.7268
D-AMS 021270	0	0	0	0.000537	0.000821	0.9422	0.9986	0.9993	0.9997	0.9996	0.9999	1	0.3811	0.653	0.8476	0.8916	1	1	1	1	1	1	1	1	1	1	1	0.14212	0.9253	0.8093	0.7924	0.9622	0.9425	1	1	1	1	0.9999	0.3607	1	1	1	0	0.20751	0.4024	0.433	0.4113	0	0.6489
Beta - 423709	0	0	0	0.000362	0.000576	0.8995	0.9929	0.9945	0.9972	0.9975	0.9993	1	0.28638	0.5297	0.7952	0.8264	1	1	1	1	1	1	1	1	1	1	1	0.10021	0.899	0.751	0.744	0.9474	0.9211	1	1	1	1	0.9998	0.26566	1	1	1	0	0.13791	0.2673	0.291	0.27319	0.3511	0
Beta - 423708	0	0	0	7.7e-05	0.000112	0.6852	0.9296	0.9353	0.9661	0.9717	0.9921	1	0.10105	0.25591	0.6543	0.5982	0.9997	0.9995	0.9999	1	1	1	1	1	1	1	1	0.025594	0.8144	0.5938	0.6224	0.8954	0.8505	1	1	1	1	0.999	0.08882	1	1	1	0	0.026876	0.05636	0.06423	0.05722	0.08993	0.17294
D-AMS 021269	0	0	0	2e-06	5e-06	0.4825	0.8453	0.8528	0.9195	0.9339	0.9779	0.9996	0.031168	0.12246	0.5643	0.4205	0.9979	0.9977	0.9996	1	1	0.9999	1	1	1	1	1	0.003896	0.7494	0.4915	0.549	0.8519	0.7942	1	1	1	1	0.9977	0.025275	1	1	1	0	0.000885	0.002054	0.002488	0.002025	0.005288	0.022792
End Acshicupoto	0	0	0	1e-06	1e-06	0.23985	0.6264	0.6255	0.7329	0.7677	0.848	0.9704	0.011332	0.06104	0.4633	0.23606	0.9481	0.9575	0.987	0.9955	0.9987	0.9965	0.9981	0.9991	0.9991	0.9996	0.9998	0.001407	0.6414	0.3776	0.4671	0.7608	0.6921	0.9996	0.9999	0.9999	0.9999	0.9807	0.011986	0.9962	0.9998	1	0	0	0	0	0	0	0
Start Hualcayan	0	0.03479	0.06439	0.19472	0.22786	0.9925	0.9999	1	1	1	1	1	0.8214	0.9633	0.9771	0.9907	1	1	1	1	1	1	1	1	1	1	1	0.5715	0.99	0.9729	0.9549	0.9951	0.9925	1	1	1	1	1	0.8159	1	1	1	0.6553	0.8671	0.9344	0.9381	0.9364	0.9445	0.9598
D-AMS 015768	0	0	0	0.002039	0.003263	0.9811	0.9998	1	1	1	1	1	0.6565	0.8973	0.9456	0.9736	1	1	1	1	1	1	1	1	1	1	1	0.3312	0.9737	0.9296	0.9032	0.9871	0.98	1	1	1	1	1	0.635	1	1	1	0.3255	0.6322	0.8083	0.8219	0.8149	0.8439	0.8913
D-AMS 008216	0	0	0	0.001118	0.001665	0.9717	0.9997	1	1	0.9999	1	1	0.5581	0.8242	0.9166	0.9531	1	1	1	1	1	1	1	1	1	1	1	0.25113	0.9586	0.8906	0.8657	0.9795	0.9685	1	1	1	1	1	0.5377	1	1	1	0.20345	0.4689	0.6726	0.6956	0.6819	0.7366	0.8229
End Hualcayan	0	0	0	0.000466	0.00065	0.7101	0.8067	0.8062	0.8229	0.8298	0.8439	0.896	0.29689	0.4977	0.6944	0.6775	0.8826	0.8906	0.92	0.9313	0.9476	0.9434	0.9475	0.9523	0.9554	0.9616	0.9693	0.11338	0.7751	0.6492	0.6584	0.8253	0.7969	0.964	0.9817	0.9765	0.9792	0.9202	0.2831	0.9332	0.972	0.9859	0.06986	0.1929	0.3298	0.3504	0.3368	0.3912	0.4831
Start Caral	0	1.6e-05	4.3e-05	0.000662	0.000894	0.8113	0.9734	0.9766	0.9878	0.9895	0.9971	1	0.16498	0.3685	0.7192	0.718	0.9999	0.9998	1	1	1	1	1	1	1	1	1	0.04418	0.8568	0.666	0.6757	0.9228	0.8868	1	1	1	1	0.9995	0.1474	1	1	1	0.016302	0.04654	0.11917	0.1364	0.1228	0.18291	0.30775
Beta-132593	0	0	0	0	0	4e-06	0.000207	8.7e-05	0.000172	0.000573	0.001421	0.16788	0	1e-06	0.06537	7.7e-05	0.05288	0.1154	0.4667	0.6401	0.934	0.8242	0.8853	0.9716	0.9631	0.998	1	0	0.06491	0.014746	0.09195	0.12079	0.08405	0.9989	1	1	1	0.5094	0	0.6828	0.9991	1	0	0	0	0	0	0	0
ISGS-4724	0	0	0	0	0	0.000601	0.018821	0.016147	0.023681	0.031357	0.04508	0.3254	2.4e-05	0.000173	0.11692	0.00319	0.21712	0.30338	0.6586	0.8104	0.9759	0.9048	0.9442	0.9907	0.9844	0.9995	1	1e-06	0.14363	0.04704	0.14741	0.22754	0.17399	0.9997	1	1	1	0.6679	1.9e-05	0.8381	0.9997	1	0	0	0	0	0	1e-06	7e-06
Beta-134427	0	0	0	0	0	0.00356	0.04633	0.04153	0.05858	0.07296	0.09753	0.4096	0.000173	0.000904	0.14544	0.008825	0.30699	0.3897	0.7116	0.844	0.9791	0.9196	0.9532	0.9916	0.9867	0.9995	1	1.7e-05	0.18853	0.07041	0.17573	0.28135	0.22295	0.9997	1	1	1	0.714	0.000153	0.8665	0.9997	1	0	1e-06	7e-06	9e-06	6e-06	2.5e-05	0.000127
ISGS-4738	0	0	0	0	0	0.001717	0.03409	0.030141	0.04325	0.05514	0.07575	0.3807	6.8e-05	0.000438	0.13506	0.006046	0.27571	0.3611	0.6972	0.8362	0.9791	0.9163	0.9517	0.9918	0.9865	0.9995	1	5e-06	0.1722	0.06148	0.1657	0.26271	0.20548	0.9997	1	1	1	0.7007	5.3e-05	0.8606	0.9997	1	0	0	2e-06	2e-06	2e-06	8e-06	3.9e-05
ISGS-4740	0	0	0	0	0	0.005205	0.07947	0.07116	0.10143	0.12552	0.16657	0.5474	0.000235	0.001311	0.19011	0.014513	0.4526	0.5372	0.8221	0.9271	0.9943	0.9589	0.9797	0.9981	0.9953	0.9999	1	2.3e-05	0.25943	0.10428	0.22187	0.3696	0.30138	1	1	1	1	0.8086	0.000193	0.9408	0.9999	1	0	0	3e-06	6e-06	2e-06	2.2e-05	0.000145
Beta-132589	0	0	0	0	0	0.003635	0.07994	0.071	0.10207	0.12812	0.17127	0.5711	0.000143	0.000903	0.19662	0.013607	0.4778	0.5643	0.8439	0.9436	0.9968	0.9662	0.9845	0.999	0.9968	1	1	1.1e-05	0.26979	0.10827	0.22868	0.3831	0.31333	1	1	1	1	0.8264	0.000124	0.9552	1	1	0	0	1e-06	1e-06	1e-06	9e-06	6.7e-05
ISGS-4710	0	0	0	0	0	0.01171	0.1201	0.10963	0.15255	0.18423	0.23839	0.6389	0.000535	0.002855	0.22346	0.023886	0.55	0.6266	0.8704	0.9548	0.9973	0.9721	0.9875	0.9991	0.9974	1	1	4.9e-05	0.31072	0.13298	0.25419	0.4292	0.357	1	1	1	1	0.8527	0.000519	0.9638	1	1	1e-06	1e-06	1.7e-05	2.6e-05	1.8e-05	7.4e-05	0.000397
GS-4726	0	0	0	0	0	0.0518	0.24549	0.23296	0.3026	0.3453	0.4198	0.7977	0.002882	0.013048	0.29826	0.06626	0.7233	0.7771	0.9358	0.9843	0.9995	0.9878	0.9956	0.9999	0.9992	1	1	0.000326	0.4214	0.20403	0.3237	0.5481	0.472	1	1	1	1	0.9167	0.002577	0.9882	1	1	1.1e-05	3.3e-05	0.000221	0.000285	0.000221	0.000682	0.002826
ISGS-4727	0	0	0	3e-06	5e-06	0.16873	0.406	0.3997	0.469	0.5031	0.569	0.8407	0.015301	0.05126	0.3702	0.16546	0.7857	0.8248	0.9446	0.9828	0.9989	0.9884	0.9951	0.9996	0.999	1	1	0.002729	0.5064	0.2832	0.3838	0.6246	0.5549	1	1	1	1	0.9316	0.013581	0.9865	1	1	0.000459	0.001605	0.005563	0.006751	0.005769	0.01058	0.024185
ISGS-4733	0	0	0	4e-06	4e-06	0.17119	0.4456	0.4387	0.5206	0.5583	0.6328	0.895	0.012776	0.04808	0.3914	0.17054	0.8451	0.8764	0.9672	0.9932	0.9998	0.994	0.998	1	0.9997	1	1	0.001931	0.5417	0.30228	0.4041	0.6634	0.5918	1	1	1	1	0.9535	0.011331	0.9951	1	1	0.000226	0.000721	0.003072	0.003746	0.003096	0.006452	0.017372
ISGS-4734	0	0	0	3e-06	5e-06	0.19182	0.4631	0.4568	0.5347	0.5709	0.6416	0.8911	0.015895	0.05626	0.3996	0.18728	0.8428	0.8739	0.965	0.9919	0.9997	0.9934	0.9977	0.9999	0.9996	1	1	0.002606	0.5485	0.31179	0.4103	0.6683	0.5979	1	1	1	1	0.9523	0.014103	0.9939	1	1	0.000367	0.001263	0.004834	0.005882	0.004996	0.009749	0.023853
Beta-134429	0	0	0	0	0	0.23407	0.6191	0.6187	0.7241	0.759	0.8401	0.9799	0.012062	0.05735	0.4609	0.23002	0.9548	0.9643	0.9926	0.9994	1	0.9987	0.9997	1	1	1	1	0.001351	0.6406	0.3752	0.4658	0.7624	0.6924	1	1	1	1	0.9853	0.010913	0.9996	1	1	6e-06	1.6e-05	0.00033	0.000473	0.000298	0.001605	0.010036
ISGS-4729	0	0	0	3e-06	6e-06	0.26191	0.591	0.5888	0.6762	0.7091	0.7805	0.9536	0.019648	0.07401	0.4572	0.24903	0.9217	0.9383	0.9853	0.9979	1	0.9975	0.9993	1	0.9999	1	1	0.003063	0.6241	0.3725	0.4608	0.742	0.6737	1	1	1	1	0.9764	0.017416	0.9986	1	1	0.000306	0.001062	0.004752	0.005832	0.004879	0.010267	0.028064
ISGS-4732	0	0	0	3e-06	4e-06	0.26086	0.5908	0.5887	0.6764	0.7093	0.7809	0.9536	0.019704	0.07386	0.4567	0.2483	0.9219	0.9384	0.9853	0.9979	1	0.9975	0.9993	1	0.9999	1	1	0.003034	0.6242	0.3719	0.4606	0.742	0.6736	1	1	1	1	0.9763	0.017465	0.9986	1	1	0.000326	0.00109	0.004758	0.005893	0.00489	0.010269	0.028064
Beta-134428	0	0	0	1e-06	3e-06	0.3976	0.7987	0.8071	0.8945	0.9127	0.97	0.999	0.025139	0.10589	0.5399	0.3618	0.9966	0.9965	0.9994	1	1	0.9999	1	1	1	1	1	0.003206	0.727	0.4631	0.5304	0.8355	0.7738	1	1	1	1	0.997	0.022746	1	1	1	0.000144	0.000407	0.003248	0.004179	0.00315	0.008991	0.031453
ISGS-4736	0	0	0	1.2e-05	1.8e-05	0.45	0.793	0.7984	0.8717	0.89	0.9408	0.9926	0.04545	0.14442	0.5568	0.4061	0.9849	0.9877	0.9973	0.9998	1	0.9995	0.9999	1	1	1	1	0.008288	0.7321	0.4824	0.543	0.8351	0.7768	1	1	1	1	0.9941	0.04036	0.9998	1	1	0.001246	0.00452	0.017922	0.021627	0.018334	0.03447	0.07749
ISGS-4711	0	0	0	1.7e-05	2.7e-05	0.4461	0.7691	0.7731	0.8432	0.8628	0.9135	0.9846	0.05063	0.15111	0.5516	0.4043	0.973	0.9784	0.9951	0.9993	1	0.9991	0.9998	1	1	1	1	0.010011	0.7218	0.4774	0.5389	0.824	0.7658	1	1	1	1	0.9908	0.04495	0.9995	1	1	0.001788	0.006617	0.023647	0.028271	0.024185	0.04283	0.08954
End Caral	0	0	0	0	0	0	3.1e-05	4e-06	1.6e-05	0.000101	0.00031	0.11748	0	0	0.04534	1.6e-05	0.021898	0.05873	0.3189	0.4573	0.8327	0.7172	0.7908	0.9078	0.9135	0.9847	0.9975	0	0.03945	0.007883	0.06715	0.07822	0.05235	0.9899	1	0.9998	0.9999	0.3825	0	0.5009	0.9959	1	0	0	0	0	0	0	0
Start Kotosh	0	0.06776	0.10958	0.21598	0.23493	0.5484	0.6014	0.6002	0.6131	0.6197	0.6323	0.7041	0.4205	0.4847	0.5793	0.5404	0.682	0.6955	0.7496	0.7722	0.8162	0.8077	0.8185	0.8303	0.842	0.8624	0.8921	0.3362	0.6172	0.5522	0.5749	0.6511	0.6307	0.8712	0.9439	0.9215	0.9333	0.7544	0.4193	0.7773	0.9037	0.9608	0.3602	0.4117	0.4429	0.4471	0.4442	0.4561	0.4776
TK-42	0	0.008554	0.016816	0.05286	0.06045	0.26707	0.3197	0.3182	0.3318	0.3389	0.3525	0.4424	0.16742	0.21322	0.30858	0.26114	0.4118	0.429	0.5024	0.5332	0.6011	0.5896	0.6065	0.6244	0.6459	0.6805	0.7378	0.11581	0.345	0.2785	0.30902	0.382	0.3598	0.6971	0.8476	0.7975	0.8237	0.5109	0.16534	0.5407	0.7616	0.8884	0.12382	0.15623	0.17903	0.18212	0.17993	0.18912	0.20645
End Kotosh	0	0.002152	0.004445	0.016552	0.019127	0.1074	0.13478	0.13381	0.14105	0.14499	0.15253	0.20885	0.0618	0.08183	0.13315	0.10475	0.18744	0.19816	0.24618	0.26666	0.3167	0.31019	0.3224	0.3354	0.3545	0.3835	0.4405	0.04077	0.15168	0.11573	0.13517	0.17262	0.16006	0.399	0.5653	0.5027	0.534	0.25334	0.06108	0.27194	0.4652	0.6338	0.04299	0.05622	0.06606	0.06746	0.06652	0.07077	0.0785
Start La Galgada	0	0.000652	0.001246	0.004025	0.004815	0.11748	0.24671	0.23928	0.28175	0.30925	0.3595	0.7109	0.03473	0.06151	0.3022	0.11994	0.6382	0.704	0.904	0.9705	0.9988	0.9804	0.992	0.9996	0.9985	1	1	0.016651	0.4003	0.21643	0.3243	0.5133	0.4446	1	1	1	1	0.8862	0.03333	0.9774	1	1	0.015065	0.023904	0.03368	0.03545	0.03416	0.03982	0.05166
TX3167	0	0	0	0	0	0.000779	0.023597	0.020055	0.029597	0.04045	0.05878	0.3864	2.7e-05	0.000185	0.13547	0.004259	0.28335	0.3758	0.7224	0.8611	0.9848	0.9275	0.96	0.9945	0.9893	0.9997	1	4e-06	0.17282	0.05925	0.16741	0.26698	0.20753	0.9999	1	1	1	0.7198	1.9e-05	0.8829	0.9998	1	0	0	0	0	0	1e-06	6e-06
TK4449	0	0	0	0	0	0.000536	0.015754	0.013221	0.019591	0.026792	0.03934	0.31379	1.6e-05	0.000134	0.11192	0.002785	0.20879	0.29138	0.633	0.7795	0.9633	0.8885	0.931	0.9845	0.9787	0.9989	1	1e-06	0.13698	0.04455	0.14208	0.21828	0.16676	0.9993	1	1	1	0.6464	2.1e-05	0.8077	0.9995	1	0	0	0	0	0	3e-06	7e-06
TK4448	0	0	0	0	0	1e-06	6e-05	3.5e-05	5.8e-05	0.000153	0.000351	0.09537	0	0	0.03484	1.7e-05	0.015309	0.03951	0.23172	0.3356	0.717	0.6248	0.7027	0.8258	0.8595	0.9681	0.9951	0	0.0283	0.005553	0.05365	0.05741	0.03798	0.979	1	0.9998	1	0.29963	0	0.3738	0.9923	1	0	0	0	0	0	0	0
TX-2463	0	0	0	0	0	0	2e-06	1e-06	3e-06	5e-06	8e-06	0.023317	0	0	0.004341	1e-06	0.000513	0.001615	0.017007	0.024836	0.10559	0.137	0.16411	0.17094	0.28118	0.4118	0.6856	0	0.001955	0.000309	0.009851	0.004986	0.002962	0.5021	0.9955	0.9328	0.9779	0.03866	0	0.030242	0.7868	0.9997	0	0	0	0	0	0	0
TX-2464	0	0	0	0	0	0	0	0	0	0	0	0.017446	0	0	0.00225	0	7.1e-05	0.000278	0.005559	0.007879	0.05123	0.08484	0.10249	0.09712	0.19566	0.30631	0.5995	0	0.000722	8e-05	0.006283	0.00208	0.001142	0.3987	0.9937	0.9062	0.9683	0.019452	0	0.010205	0.7299	0.9995	0	0	0	0	0	0	0
TX-3166	0	0	0	0	0	2.1e-05	0.000861	0.000674	0.001027	0.001625	0.002724	0.11613	0	6e-06	0.04235	0.000171	0.03433	0.06649	0.27471	0.3818	0.7173	0.6368	0.7072	0.8128	0.8489	0.9499	0.9887	0	0.0391	0.009246	0.06195	0.07358	0.05094	0.9652	1	0.9995	0.9999	0.3327	1e-06	0.4171	0.9883	1	0	0	0	0	0	0	0
TX-3663	0	0	0	0	0	0	0	0	0	0	0	0.03182	0	0	0.006692	0	0.000189	0.000854	0.021847	0.03252	0.1883	0.23396	0.28274	0.31108	0.4725	0.673	0.9046	0	0.0025	0.000291	0.01479	0.00685	0.003757	0.7632	1	0.9958	0.9996	0.06046	0	0.04216	0.9265	1	0	0	0	0	0	0	0
TX-4446	0	0	0	0	0	0	0	0	0	0	0	0.003711	0	0	2.7e-05	0	0	0	8e-06	5e-06	0.000191	0.000819	0.000905	0.000489	0.002938	0.005406	0.06926	0	3e-06	0	0.000208	1e-05	5e-06	0.010497	0.5059	0.16793	0.31116	0.000156	0	1.5e-05	0.1089	0.8028	0	0	0	0	0	0	0
TX-4447	0	0	0	0	0	1.3e-05	0.000506	0.000383	0.000587	0.000995	0.001867	0.11958	0	1e-06	0.04412	0.000109	0.03245	0.06688	0.29496	0.413	0.7676	0.6727	0.7454	0.8581	0.882	0.9724	0.9953	0	0.04039	0.009137	0.06494	0.07699	0.05286	0.9818	1	0.9998	1	0.355	0	0.4509	0.9933	1	0	0	0	0	0	0	0
End La Galgada	0	0	0	0	0	0	0	0	0	0	0	0.002467	0	0	7e-06	0	0	0	2e-06	0	3.4e-05	0.00022	0.000226	9.6e-05	0.000894	0.001635	0.03573	0	1e-06	0	8.6e-05	3e-06	1e-06	0.003546	0.26351	0.07579	0.14855	4.2e-05	0	2e-06	0.04949	0.5502	0	0	0	0	0	0	0
Start Pampa de las Llamas	0	5.3e-05	0.000101	0.00033	0.00039	0.011062	0.025288	0.024032	0.02881	0.0327	0.03949	0.18874	0.003062	0.005576	0.07209	0.011695	0.10734	0.14537	0.3577	0.461	0.7514	0.6802	0.7422	0.8328	0.8651	0.9531	0.9906	0.001446	0.0812	0.03172	0.09277	0.12665	0.0969	0.9689	1	0.9996	1	0.4044	0.003044	0.4919	0.9897	1	0.001291	0.002084	0.003013	0.00319	0.00306	0.003593	0.004714
UGa-5796	0	0	0	0	0	3.9e-05	0.000929	0.000743	0.001087	0.001571	0.002422	0.08827	0	8e-06	0.03053	0.000173	0.022129	0.04113	0.18533	0.26115	0.5814	0.5265	0.5956	0.6952	0.7609	0.8926	0.97	0	0.026008	0.006027	0.04657	0.05024	0.03405	0.9236	1	0.9988	0.9999	0.24442	3e-06	0.29108	0.9756	1	0	0	0	0	0	0	0
UGa-5462	0	0	0	0	0	0	0	0	0	0	0	0.025553	0	0	0.004681	0	0.000137	0.000607	0.014179	0.020471	0.12134	0.16595	0.20106	0.20922	0.3515	0.5193	0.8037	0	0.001669	0.000171	0.010981	0.004589	0.00255	0.6226	0.9995	0.9803	0.9959	0.04123	0	0.026981	0.8678	1	0	0	0	0	0	0	0
UGa-4506	0	0	0	0	0	0	0	0	0	0	1e-06	0.022104	0	0	0.003479	0	8.7e-05	0.000398	0.009423	0.013703	0.08727	0.12988	0.15755	0.15816	0.28666	0.4347	0.7332	0	0.001154	0.000117	0.008914	0.003332	0.001805	0.5386	0.9985	0.9614	0.99	0.030797	0	0.018025	0.8233	0.9999	0	0	0	0	0	0	0
UGa-5609	0	0	0	0	0	0	0	0	0	0	0	0.004049	0	0	1e-05	0	0	0	1e-06	0	1.3e-05	0.00025	0.000255	4.6e-05	0.001211	0.00218	0.0739	0	1e-06	0	0.000181	2e-06	1e-06	0.005257	0.6821	0.20604	0.4224	3.8e-05	0	2e-06	0.12837	0.925	0	0	0	0	0	0	0
UGa-5797	0	0	0	0	0	0	0	0	0	0	0	0.003848	0	0	7e-06	0	0	0	0	0	1.2e-05	0.000179	0.000169	1.9e-05	0.000845	0.001538	0.06599	0	0	0	0.000144	2e-06	0	0.003725	0.6382	0.17125	0.3755	2.2e-05	0	0	0.10835	0.9084	0	0	0	0	0	0	0
UGa-5630	0	0	0	0	0	0	0	0	0	0	0	0.003257	0	0	2e-06	0	0	0	0	0	3e-06	4.7e-05	5.6e-05	5e-06	0.000271	0.000488	0.04757	0	0	0	7.3e-05	0	0	0.001241	0.5005	0.09281	0.24948	7e-06	0	0	0.06328	0.8456	0	0	0	0	0	0	0
UGa-5794	0	0	0	0	0	0	0	0	0	0	0	0.003181	0	0	2e-06	0	0	0	0	0	1e-06	4.5e-05	3.7e-05	3e-06	0.000211	0.000382	0.04506	0	0	0	6.3e-05	0	0	0.001041	0.4772	0.08367	0.2318	7e-06	0	0	0.05765	0.8319	0	0	0	0	0	0	0
UGa-4511	0	0	0	0	0	0	0	0	0	0	0	0.003425	0	0	1.5e-05	0	0	0	7e-06	9e-06	0.000117	0.000528	0.000612	0.000318	0.001915	0.003562	0.06006	0	1e-06	0	0.000165	8e-06	4e-06	0.007017	0.4799	0.14113	0.28035	8.6e-05	0	1.2e-05	0.09154	0.7931	0	0	0	0	0	0	0
UGa-5798	0	0	0	0	0	0	0	0	0	0	0	0.003105	0	0	9e-06	0	0	0	1e-06	1e-06	3.5e-05	0.000221	0.000247	0.000111	0.00089	0.001672	0.04771	0	1e-06	0	9.4e-05	4e-06	2e-06	0.003518	0.4158	0.09952	0.22162	3.4e-05	0	3e-06	0.06572	0.76	0	0	0	0	0	0	0
UGa-5873	0	0	0	0	0	0	0	0	0	0	0	0.002091	0	0	0	0	0	0	0	0	0	0	0	0	0	0	0.019035	0	0	0	4e-06	0	0	0	0.11077	0.0019	0.016319	0	0	0	0.004411	0.5641	0	0	0	0	0	0	0
End Pampa de las Llamas	0	0	0	0	0	0	0	0	0	0	0	0.001391	0	0	0	0	0	0	0	0	0	0	0	0	0	0	0.009485	0	0	0	0	0	0	0	0.028641	0.000138	0.002623	0	0	0	0.000972	0.30811	0	0	0	0	0	0	0
Start Buena Vista	0	0.000482	0.000923	0.002879	0.00329	0.06591	0.13516	0.13077	0.15344	0.16897	0.19803	0.4886	0.020906	0.03595	0.20362	0.06745	0.3991	0.4696	0.742	0.8526	0.9765	0.9241	0.9542	0.9903	0.9864	0.9994	1	0.010486	0.26088	0.13034	0.22869	0.3529	0.29574	0.9996	1	1	1	0.7447	0.02026	0.8726	0.9997	1	0.009629	0.014792	0.020475	0.021442	0.020775	0.023929	0.030432
PI-1845	0	0	0	0	0	0	0	0	0	0	0	0.014432	0	0	0.001298	0	4e-06	1.6e-05	0.001409	0.00167	0.022748	0.05474	0.0667	0.05429	0.14311	0.23917	0.557	0	0.000275	2e-05	0.00457	0.00091	0.000436	0.3366	0.9957	0.9128	0.9745	0.010391	0	0.00256	0.7127	0.9998	0	0	0	0	0	0	0
UGAMS- 3129	0	0	0	0	0	0	0	0	0	0	0	0.013253	0	0	0.000825	0	0	0	0.000546	0.000457	0.010646	0.03549	0.04311	0.028742	0.10402	0.18652	0.5354	0	0.000141	8e-06	0.003646	0.000523	0.00025	0.29112	0.9995	0.9487	0.9917	0.006262	0	0.00092	0.7275	1	0	0	0	0	0	0	0
UGAMS- 3127	0	0	0	0	0	0	0	0	0	0	0	0.017397	0	0	0.001708	0	0	0	0.001255	0.001117	0.026397	0.07473	0.09122	0.07078	0.19921	0.3363	0.705	0	0.000323	2e-05	0.005939	0.00113	0.000564	0.4657	0.9999	0.9802	0.9974	0.013615	0	0.002238	0.8213	1	0	0	0	0	0	0	0
UGAMS- 3128	0	0	0	0	0	0	0	0	0	0	0	0.023808	0	0	0.00344	0	0	8e-06	0.004204	0.004638	0.0722	0.14827	0.1823	0.16775	0.3551	0.5585	0.8806	0	0.000742	4.9e-05	0.009711	0.002523	0.001256	0.6864	1	0.996	0.9997	0.028871	0	0.007741	0.9063	1	0	0	0	0	0	0	0
GX-30695	0	0	0	0	0	0	0	0	0	0	4e-06	0.05595	0	0	0.017109	1e-06	0.001937	0.007729	0.092	0.13958	0.4805	0.4483	0.525	0.6358	0.732	0.9069	0.9823	0	0.009729	0.001433	0.030285	0.02298	0.014065	0.937	1	0.9994	1	0.15906	0	0.16653	0.9792	1	0	0	0	0	0	0	0
GX-31276	0	0	0	0	0	0.000295	0.007019	0.005942	0.008713	0.011844	0.017694	0.20368	8e-06	7.5e-05	0.07429	0.001284	0.10606	0.16254	0.4524	0.591	0.8849	0.7878	0.8487	0.9401	0.9413	0.9925	0.9993	2e-06	0.08255	0.024207	0.0999	0.13919	0.10269	0.9953	1	1	1	0.4946	1.4e-05	0.627	0.9978	1	0	0	0	1e-06	0	2e-06	7e-06
GX-32177	0	0	0	0	0	0.000476	0.009757	0.008346	0.012151	0.016328	0.023798	0.22659	1.8e-05	0.000121	0.08218	0.001834	0.12752	0.18807	0.4862	0.6263	0.9025	0.8079	0.8655	0.9508	0.9499	0.9944	0.9995	1e-06	0.09395	0.028778	0.10826	0.1553	0.11574	0.9965	1	1	1	0.5234	1.9e-05	0.6614	0.9983	1	0	0	0	1e-06	0	3e-06	1.1e-05
End Buena Vista	0	0	0	0	0	0	0	0	0	0	0	0.007115	0	0	0.000144	0	0	0	4.4e-05	3.8e-05	0.000894	0.005548	0.006425	0.002626	0.020362	0.03954	0.23427	0	2.3e-05	1e-06	0.001128	7.2e-05	3.2e-05	0.07738	0.856	0.6098	0.7594	0.000937	0	7e-05	0.401	0.9323	0	0	0	0	0	0	0
Start El Paraiso	0	0.001398	0.002514	0.006552	0.007492	0.05306	0.07885	0.07765	0.08539	0.09031	0.09938	0.22741	0.025658	0.03636	0.10741	0.05232	0.16219	0.19104	0.3442	0.4171	0.6528	0.6166	0.6719	0.7405	0.8026	0.9128	0.9811	0.015981	0.12353	0.07224	0.12307	0.16372	0.13841	0.9399	1	0.9993	1	0.3839	0.025103	0.4399	0.9811	1	0.016458	0.021986	0.026729	0.027487	0.026972	0.029232	0.03379
Beta-8704	0	0	0	0	0	0	0	0	0	0	0	0.001624	0	0	0	0	0	0	0	0	0	0	0	0	0	0	0.012363	0	0	0	2e-06	0	0	1e-06	0.05503	0.0014	0.009076	0	0	0	0.002429	0.384	0	0	0	0	0	0	0
JQ02	0	0	0	0	0	0	0	0	0	0	0	0.011823	0	0	0.000501	0	0	0	0.000223	0.000189	0.004534	0.020848	0.024514	0.012502	0.0684	0.13022	0.4728	0	7.3e-05	4e-06	0.002815	0.000299	0.000144	0.22676	0.9994	0.937	0.9896	0.003493	0	0.000394	0.6927	1	0	0	0	0	0	0	0
JQ10	0	0	0	0	0	0	0	0	0	0	0	0.017234	0	0	0.001648	0	0	0	0.001193	0.001052	0.024829	0.07201	0.08777	0.06616	0.19366	0.3288	0.7044	0	0.000298	1.3e-05	0.005836	0.001098	0.000519	0.4613	0.9999	0.9821	0.9978	0.012967	0	0.002073	0.8228	1	0	0	0	0	0	0	0
I-13275	0	0	0	0	0	1e-06	4.8e-05	3.9e-05	5.6e-05	8.2e-05	0.000137	0.03226	0	0	0.007646	4e-06	0.002009	0.004703	0.03641	0.05279	0.18362	0.20769	0.24535	0.26904	0.388	0.5389	0.7878	0	0.004436	0.000815	0.015062	0.010007	0.006192	0.6265	0.9983	0.9667	0.9904	0.06701	0	0.06233	0.8561	0.9999	0	0	0	0	0	0	0
I-13276	0	0	0	0	0	1e-06	6.2e-05	4.5e-05	6.9e-05	9.8e-05	0.000158	0.03431	0	0	0.00832	1.2e-05	0.002373	0.005634	0.04128	0.06002	0.20022	0.22189	0.26173	0.28852	0.4078	0.5602	0.8024	0	0.005144	0.000899	0.016171	0.011165	0.007158	0.6467	0.9985	0.971	0.9918	0.07352	0	0.07017	0.866	0.9999	0	0	0	0	0	0	0
End El Paraiso	0	0	0	0	0	0	0	0	0	0	0	0.000952	0	0	0	0	0	0	0	0	0	0	0	0	0	0	0.005598	0	0	0	1e-06	0	0	0	0.015185	0.000317	0.002138	0	0	0	0.000625	0.18569	0	0	0	0	0	0	0
Start Taukachi-Konkan	0	0	0	0	0	0	0	0	0	0	0	0.003627	0	0	1e-06	0	0	0	0	0	0	9e-06	9e-06	0	6.7e-05	7.5e-05	0.05306	0	0	0	6.2e-05	0	0	0.000193	0.7074	0.10199	0.361	1e-06	0	0	0.07378	0.9574	0	0	0	0	0	0	0
Beta-535191	0	0	0	0	0	0	0	0	0	0	0	0.003321	0	0	0	0	0	0	0	0	0	2e-06	0	0	2e-05	8e-06	0.04446	0	0	0	3.9e-05	0	0	2.3e-05	0.5816	0.06146	0.25723	0	0	0	0.05028	0.9253	0	0	0	0	0	0	0
Beta-427589	0	0	0	0	0	0	0	0	0	0	0	0.003263	0	0	0	0	0	0	0	0	0	0	0	0	1.5e-05	5e-06	0.04295	0	0	0	3.5e-05	0	0	1.1e-05	0.5583	0.05425	0.23826	0	0	0	0.04618	0.9186	0	0	0	0	0	0	0
Beta-427588	0	0	0	0	0	0	0	0	0	0	0	0.003245	0	0	0	0	0	0	0	0	0	1e-06	0	0	1.4e-05	4e-06	0.0426	0	0	0	3.6e-05	0	0	1.1e-05	0.5516	0.05264	0.2332	0	0	0	0.04512	0.9164	0	0	0	0	0	0	0
Beta-427587	0	0	0	0	0	0	0	0	0	0	0	0.003237	0	0	0	0	0	0	0	0	0	0	0	0	1.1e-05	4e-06	0.04224	0	0	0	3.6e-05	0	0	1e-05	0.5452	0.05131	0.22872	0	0	0	0.04426	0.9143	0	0	0	0	0	0	0
Beta-535190	0	0	0	0	0	0	0	0	0	0	0	0.003195	0	0	0	0	0	0	0	0	0	0	0	0	1.1e-05	4e-06	0.04135	0	0	0	3.4e-05	0	0	7e-06	0.5268	0.04797	0.21646	0	0	0	0.04189	0.9061	0	0	0	0	0	0	0
Beta-535192	0	0	0	0	0	0	0	0	0	0	0	0.003213	0	0	0	0	0	0	0	0	0	1e-06	0	0	1.3e-05	3e-06	0.04185	0	0	0	3.3e-05	0	0	8e-06	0.5393	0.05007	0.22451	0	0	0	0.04353	0.9117	0	0	0	0	0	0	0
Beta-477229	0	0	0	0	0	0	0	0	0	0	0	0.003161	0	0	0	0	0	0	0	0	0	0	0	0	9e-06	3e-06	0.04035	0	0	0	3.1e-05	0	0	7e-06	0.5067	0.04488	0.2044	0	0	0	0.03975	0.8957	0	0	0	0	0	0	0
Beta-477227	0	0	0	0	0	0	0	0	0	0	0	0.003299	0	0	0	0	0	0	0	0	0	2e-06	0	0	1.8e-05	6e-06	0.04395	0	0	0	3.7e-05	0	0	1.6e-05	0.5732	0.05885	0.25024	0	0	0	0.04881	0.9232	0	0	0	0	0	0	0
Beta- 477228	0	0	0	0	0	0	0	0	0	0	0	0.003264	0	0	0	0	0	0	0	0	0	1e-06	0	0	1.5e-05	4e-06	0.04294	0	0	0	3.6e-05	0	0	1e-05	0.5582	0.05422	0.23803	0	0	0	0.04615	0.9187	0	0	0	0	0	0	0
End Taukachi-Konkan	0	0	0	0	0	0	0	0	0	0	0	0.002914	0	0	0	0	0	0	0	0	0	0	0	0	4e-06	2e-06	0.03461	0	0	0	1.9e-05	0	0	3e-06	0.3891	0.025029	0.12945	0	0	0	0.025794	0.8417	0	0	0	0	0	0	0
Start Gramalote	0	0.001563	0.002671	0.005991	0.006684	0.025147	0.031178	0.030969	0.03258	0.03349	0.03532	0.05528	0.015742	0.019866	0.03243	0.0247	0.04444	0.04777	0.06371	0.07109	0.09381	0.09372	0.09972	0.10437	0.11928	0.1393	0.22206	0.011282	0.03632	0.027636	0.03385	0.04207	0.03853	0.15425	0.5821	0.3238	0.4308	0.06785	0.015533	0.07335	0.26211	0.8385	0.011896	0.014653	0.016634	0.016926	0.016694	0.017549	0.01917
Beta-321940	0	0	0	0	0	0	0	0	0	0	0	0.001876	0	0	0	0	0	0	0	0	0	0	0	0	0	0	0.015478	0	0	0	2e-06	0	0	0	0.07226	0.000844	0.008932	0	0	0	0.002644	0.4751	0	0	0	0	0	0	0
Beta-321943	0	0	0	0	0	0	0	0	0	0	0	0.002266	0	0	0	0	0	0	0	0	0	0	0	0	2e-06	0	0.022245	0	0	0	7e-06	0	0	1e-06	0.17325	0.007923	0.04405	0	0	0	0.009563	0.6118	0	0	0	0	0	0	0
End Gramalote	0	0	0	0	0	0	0	0	0	0	0	0.001169	0	0	0	0	0	0	0	0	0	0	0	0	0	0	0.007757	0	0	0	0	0	0	0	0.022508	0.000135	0.002162	0	0	0	0.000754	0.25038	0	0	0	0	0	0	0
Start Chavin	0	5e-06	7e-06	2.2e-05	2.2e-05	0.000115	0.000148	0.000144	0.000156	0.000161	0.00017	0.000504	6.6e-05	8.7e-05	0.000158	0.000113	0.000217	0.000239	0.000337	0.000394	0.000551	0.000545	0.0006	0.000633	0.000737	0.000886	0.001844	4.3e-05	0.000179	0.000123	0.000161	0.000215	0.000189	0.000976	0.003452	0.002058	0.002622	0.000373	6.5e-05	0.000411	0.001692	0.01994	4.8e-05	6.2e-05	7.1e-05	7.3e-05	7.1e-05	7.5e-05	8.3e-05
AA69448	0	0	0	0	0	0	0	0	0	0	0	6.8e-05	0	0	0	0	0	0	0	0	0	0	0	0	0	0	9.1e-05	0	0	0	0	0	0	0	0	0	0	0	0	0	0	0.003195	0	0	0	0	0	0	0
AA69449	0	0	0	0	0	0	0	0	0	0	0	7.7e-05	0	0	0	0	0	0	0	0	0	0	0	0	0	0	0.000111	0	0	0	0	0	0	0	0	0	0	0	0	0	0	0.00407	0	0	0	0	0	0	0
AA69446	0	0	0	0	0	0	0	0	0	0	0	0.000109	0	0	0	0	0	0	0	0	0	0	0	0	0	0	0.00016	0	0	0	0	0	0	0	0	0	0	0	0	0	0	0.006058	0	0	0	0	0	0	0
AA69447	0	0	0	0	0	0	0	0	0	0	0	0.000133	0	0	0	0	0	0	0	0	0	0	0	0	0	0	0.000198	0	0	0	0	0	0	0	0	0	0	0	0	0	0	0.007721	0	0	0	0	0	0	0
End Chavin	0	0	0	0	0	0	0	0	0	0	0	4.8e-05	0	0	0	0	0	0	0	0	0	0	0	0	0	0	5.9e-05	0	0	0	0	0	0	0	0	0	0	0	0	0	0	0.002136	0	0	0	0	0	0	0
End Kotosh Religious Tradition	0	0	0	0	0	0	0	0	0	0	0	0	0	0	0	0	0	0	0	0	0	0	0	0	0	0	0	0	0	0	0	0	0	0	0	0	0	0	0	0	0	0	0	0	0	0	0	0	0
[truncated: 90 more columns]

## Sheet: Model D
Order	Start Kotosh Religious Tradition	Start Huaricanga	AA102184	AA102185	AA102179	AA84560	AA102181	AA102180	AA10282	AA84551	AA84552	End Huaricanga	Start Huaynuna	UGa-4522	UGa-4520	UGa-5619	UGa-5612	UGa-4521	UGa-5631	UGa-5617	UGa-5615	UGa-5614	UGa-5618	UGa-5632	End Huaynuna	Start Piruro	LV-498	Gif-7266	End Piruro	Start Acshicupoto	PRI-14-108-71	D-AMS 021271	D-AMS 014375	D-AMS 014376	D-AMS 021270	Beta - 423709	Beta - 423708	D-AMS 021269	End Acshicupoto	Start Hualcayan	D-AMS 008213	D-AMS 008215	D-AMS 015768	D-AMS 008216	End Hualcayan	Start Caral	Beta-132593	ISGS-4724	Beta-134427
Start Kotosh Religious Tradition	0	1	1	1	1	1	1	1	1	1	1	1	1	1	1	1	1	1	1	1	1	1	1	1	1	1	1	1	1	1	1	1	1	1	1	1	1	1	1	1	1	1	1	1	1	1	1	1	1
Start Huaricanga	0	0	1	1	1	1	1	1	1	1	1	1	0.9942	1	1	1	1	1	1	1	1	1	1	1	1	0.9717	1	1	1	0.998	1	1	1	1	1	1	1	1	1	0.9857	1	1	1	1	1	1	1	1	1
AA102184	0	0	0	0.8724	0.9148	1	1	1	1	1	1	1	0.9879	1	1	1	1	1	1	1	1	1	1	1	1	0.9538	1	1	1	0.9951	1	1	1	1	1	1	1	1	1	0.9754	1	1	1	1	1	0.9999	1	1	1
AA102185	0	0	0.12757	0	0.5801	0.9999	1	1	1	1	1	1	0.9559	0.998	0.9997	1	1	1	1	1	1	1	1	1	1	0.9103	1	1	1	0.9699	0.9963	0.9981	0.9984	0.9982	0.9987	0.9994	0.9999	1	1	0.9468	1	1	1	1	1	0.9991	1	1	1
AA102179	0	0	0.08524	0.4199	0	0.9997	1	1	1	1	1	1	0.9459	0.9967	0.9996	1	1	1	1	1	1	1	1	1	1	0.9004	1	1	1	0.9592	0.9936	0.9968	0.9972	0.997	0.9978	0.9989	0.9999	1	1	0.9398	1	1	1	1	1	0.9987	1	1	1
AA84560	0	0	0	0.000138	0.000254	0	0.8664	0.8784	0.8984	0.9034	0.9275	1	0.07443	0.19553	0.5091	0.9868	0.9892	0.998	0.9999	1	0.9999	1	1	1	1	0.5914	1	0.9984	1	0.008491	0.014106	0.03553	0.04343	0.0373	0.06812	0.14404	0.28483	0.4475	0.6347	0.5597	1	1	1	0.9764	1	0.2449	1	0.9974	0.9908
AA102181	0	0	0	0	1e-06	0.13362	0	0.5006	0.5426	0.5747	0.6475	1	0.010881	0.03398	0.18871	0.923	0.9386	0.9881	0.9991	1	0.9996	1	1	1	1	0.4783	1	0.9893	1	4.5e-05	9.3e-05	0.001235	0.001804	0.001386	0.003784	0.010541	0.02527	0.09465	0.22492	0.355	1	1	1	0.8582	1	0.03503	0.9998	0.9837	0.9513
AA102180	0	0	0	0	1e-06	0.12161	0.4994	0	0.5433	0.5769	0.6522	1	0.009027	0.028482	0.18009	0.9281	0.9425	0.9891	0.9993	1	0.9996	1	1	1	1	0.4791	1	0.9905	1	1e-06	8e-06	0.000629	0.000932	0.000697	0.002059	0.005918	0.014932	0.08177	0.21209	0.3549	1	1	1	0.8673	1	0.026917	0.9999	0.9853	0.9539
AA10282	0	0	0	0	0	0.10161	0.4574	0.4567	0	0.5357	0.6144	1	0.006881	0.022566	0.16007	0.9166	0.9332	0.9872	0.9991	1	0.9995	1	1	1	1	0.4673	1	0.9883	1	0	3e-06	0.000258	0.000426	0.000284	0.000927	0.002633	0.007297	0.06367	0.18571	0.3335	1	1	1	0.8443	1	0.018882	0.9998	0.9826	0.9468
AA84551	0	0	0	0	0	0.09658	0.4253	0.4231	0.4643	0	0.5766	1	0.006884	0.022378	0.15166	0.8983	0.9198	0.9836	0.9985	1	0.9993	1	1	1	1	0.4556	1	0.984	1	1e-06	1e-05	0.000397	0.000567	0.000403	0.001241	0.003616	0.009393	0.06207	0.17621	0.31556	1	1	1	0.8117	1	0.019243	0.9995	0.9769	0.9372
AA84552	0	0	0	0	0	0.07252	0.3525	0.3478	0.3856	0.4234	0	1	0.004639	0.015956	0.12312	0.8639	0.8929	0.977	0.9971	1	0.999	1	0.9999	1	1	0.4309	1	0.9758	1	0	2e-06	0.000111	0.000135	0.000108	0.000375	0.000964	0.003037	0.04284	0.14155	0.27553	1	1	0.9999	0.7506	1	0.011722	0.9987	0.9665	0.9181
End Huaricanga	0	0	0	0	0	0	0	0	0	0	0	0	0.000233	0.0017	0.018413	0.5009	0.5771	0.8068	0.8858	0.9602	0.9498	0.9706	0.9715	0.9831	0.9912	0.24198	0.9986	0.771	0.9994	0	0	0	0	0	0	0	1.9e-05	0.001764	0.026493	0.06846	0.9985	0.996	0.9372	0.29271	0.9993	0.000194	0.86	0.7325	0.6503
Start Huaynuna	0	0.005766	0.012141	0.04409	0.0541	0.9256	0.9891	0.991	0.9931	0.9931	0.9954	0.9998	0	1	1	1	1	1	1	1	1	1	1	1	1	0.7456	1	0.9999	1	0.3437	0.4752	0.6035	0.6287	0.6147	0.673	0.7696	0.8822	0.9245	0.9615	0.7809	1	1	1	0.9987	1	0.8178	1	0.9999	0.9994
UGa-4522	0	7e-06	1.9e-05	0.002006	0.003347	0.8045	0.966	0.9715	0.9774	0.9776	0.984	0.9983	0	0	0.8201	0.9976	0.9981	0.9996	1	1	1	1	1	1	1	0.6797	1	0.9996	1	0.13014	0.21843	0.3424	0.3696	0.3536	0.4218	0.5409	0.6974	0.7888	0.8735	0.6963	1	1	1	0.9944	1	0.6192	1	0.9994	0.9977
UGa-4520	0	0	0	0.00027	0.000446	0.4909	0.8113	0.8199	0.8399	0.8483	0.8769	0.9816	0	0.1799	0	0.9735	0.9788	0.9958	0.9996	1	0.9998	1	1	1	1	0.5826	1	0.9958	1	0.018418	0.03393	0.07161	0.0823	0.07492	0.10963	0.18627	0.31435	0.4475	0.6039	0.5413	1	1	1	0.9509	1	0.27263	0.9999	0.9938	0.9825
UGa-5619	0	0	0	0	0	0.013225	0.07703	0.07191	0.08339	0.10174	0.13613	0.4991	0	0.002396	0.026472	0	0.5865	0.8449	0.9344	0.9961	0.9828	0.9989	0.9963	1	1	0.24877	1	0.8041	1	0	0	1e-06	4e-06	1e-06	5e-06	2.6e-05	0.000193	0.006953	0.03698	0.07649	1	1	0.9872	0.28288	1	0.001696	0.9107	0.7594	0.6707
UGa-5612	0	0	0	0	0	0.010801	0.06138	0.05753	0.06676	0.08021	0.10707	0.4229	0	0.00193	0.021204	0.4135	0	0.7799	0.8861	0.9898	0.9691	0.9966	0.9922	0.9998	1	0.21094	1	0.7241	1	0	1e-06	7e-06	9e-06	5e-06	2.2e-05	7.1e-05	0.000278	0.00575	0.030185	0.06017	1	1	0.9689	0.22012	1	0.001471	0.8376	0.6679	0.5856
UGa-4521	0	0	0	0	0	0.001986	0.01188	0.010852	0.012813	0.016357	0.022954	0.19316	0	0.000352	0.004155	0.15513	0.22011	0	0.6311	0.9057	0.8694	0.9499	0.9473	0.9892	1	0.08993	1	0.4081	1	0	0	1e-06	3e-06	3e-06	3e-06	1.5e-05	4.6e-05	0.000989	0.008617	0.012923	1	1	0.7974	0.05293	1	0.000258	0.5115	0.3374	0.28673
UGa-5631	0	0	0	0	0	7.9e-05	0.000893	0.000665	0.000911	0.001542	0.00287	0.11417	0	2.8e-05	0.000405	0.06559	0.11388	0.3689	0	0.8576	0.8169	0.9247	0.9239	0.9847	1	0.04571	1	0.26646	1	0	0	0	0	0	0	0	1e-06	5e-05	0.003217	0.001519	1	1	0.6976	0.008491	1	1.2e-05	0.3549	0.19787	0.16566
UGa-5617	0	0	0	0	0	0	0	0	0	5e-06	1.4e-05	0.03979	0	0	2e-06	0.003941	0.010219	0.09426	0.14237	0	0.5245	0.6405	0.709	0.8709	1	0.004752	1	0.0405	1	0	0	0	0	0	0	0	0	0	0.001032	4e-06	1	1	0.24484	4e-05	1	0	0.06105	0.022426	0.01978
UGa-5615	0	0	0	0	0	5.9e-05	0.000422	0.000383	0.000465	0.00067	0.001007	0.05023	0	1.1e-05	0.00018	0.017153	0.030896	0.1306	0.1831	0.4755	0	0.5872	0.662	0.8154	1	0.012749	1	0.07941	1	0	0	0	0	0	0	0	2e-06	2.4e-05	0.001413	0.000566	1	0.9996	0.27846	0.002722	1	8e-06	0.10825	0.05513	0.04664
UGa-5614	0	0	0	0	0	0	0	0	0	1e-06	2e-06	0.029439	0	0	1e-06	0.001119	0.003407	0.05008	0.07529	0.3595	0.4128	0	0.6024	0.7923	1	0.001848	1	0.016712	1	0	0	0	0	0	0	0	0	0	0.000746	1e-06	1	1	0.13161	8e-06	1	0	0.025526	0.008149	0.007348
UGa-5618	0	0	0	0	0	3e-06	2.3e-05	2.2e-05	1.8e-05	4.9e-05	9.8e-05	0.028512	0	1e-06	1.3e-05	0.003705	0.00784	0.05273	0.07609	0.29102	0.338	0.3976	0	0.6786	1	0.003526	0.9999	0.024903	1	0	0	0	0	0	0	0	0	0	0.000714	5.5e-05	1	0.9973	0.1234	0.000295	1	0	0.03521	0.01524	0.013291
UGa-5632	0	0	0	0	0	0	0	0	0	0	0	0.01688	0	0	0	5e-05	0.000211	0.010816	0.015278	0.12906	0.18456	0.20772	0.3214	0	1	0.000171	0.9998	0.001838	1	0	0	0	0	0	0	0	0	0	0.000424	0	1	0.9945	0.025528	0	1	0	0.002546	0.000609	0.000671
End Huaynuna	0	0	0	0	0	0	0	0	0	0	0	0.008847	0	0	0	0	0	0	0	0	0	0	0	0	0	6e-06	0.9714	0.000105	0.9914	0	0	0	0	0	0	0	0	0	0.000218	0	0.9733	0.8421	0.002459	0	0.9891	0	8.4e-05	8e-06	2.2e-05
Start Piruro	0	0.028311	0.04622	0.08967	0.09958	0.4086	0.5217	0.5209	0.5327	0.5444	0.5691	0.758	0.25442	0.3203	0.4174	0.7512	0.7891	0.9101	0.9543	0.9952	0.9873	0.9982	0.9965	0.9998	1	0	1	1	1	0.21406	0.24995	0.28037	0.28666	0.28284	0.29866	0.3265	0.3638	0.3968	0.4467	0.4264	1	1	0.9863	0.6587	1	0.3483	0.9356	0.8656	0.8256
LV-498	0	0	0	0	0	0	0	0	0	0	0	0.001398	0	0	0	0	0	0	0	1e-06	1.7e-05	5e-06	9.7e-05	0.000191	0.028576	0	0	0	1	0	0	0	0	0	0	0	0	0	5e-06	0	0.4176	0.016171	0	0	0.7699	0	0	0	0
Gif-7266	0	0	0	0	0	0.001557	0.010709	0.009465	0.011678	0.016025	0.02418	0.22898	9.6e-05	0.000444	0.004172	0.19587	0.27592	0.5919	0.7335	0.9595	0.9206	0.9833	0.9751	0.9982	0.9999	0	1	0	1	0	0	1e-06	1e-06	0	0	1e-06	2.3e-05	0.000693	0.009232	0.013768	1	1	0.8927	0.06218	1	0.000184	0.6221	0.4213	0.3573
End Piruro	0	0	0	0	0	0	0	0	0	0	0	0.000566	0	0	0	0	0	0	0	0	0	0	1.2e-05	2.3e-05	0.00856	0	0	0	0	0	0	0	0	0	0	0	0	0	0	0	0.09024	0.002179	0	0	0.3686	0	0	0	0
Start Acshicupoto	0	0.002012	0.004933	0.030127	0.04078	0.9915	1	1	1	1	1	1	0.6563	0.8699	0.9816	1	1	1	1	1	1	1	1	1	1	0.7859	1	1	1	0	1	1	1	1	1	1	1	1	1	0.8358	1	1	1	1	1	0.9615	1	1	1
PRI-14-108-71	0	0	0	0.003738	0.006441	0.9859	0.9999	1	1	1	1	1	0.5248	0.7816	0.9661	1	1	1	1	1	1	1	1	1	1	0.75	1	1	1	0	0	0.7435	0.7789	0.7607	0.8286	0.9146	0.985	0.9967	1	0.797	1	1	1	1	1	0.9234	1	1	1
D-AMS 021271	0	0	0	0.001939	0.003229	0.9645	0.9988	0.9994	0.9997	0.9996	0.9999	1	0.3965	0.6576	0.9284	1	1	1	1	1	1	1	1	1	1	0.7196	1	1	1	0	0.25652	0	0.5462	0.5201	0.6241	0.7794	0.9431	0.9836	1	0.7582	1	1	1	1	1	0.8345	1	1	1
D-AMS 014375	0	0	0	0.001596	0.002815	0.9566	0.9982	0.9991	0.9996	0.9994	0.9999	1	0.3713	0.6304	0.9177	1	1	1	1	1	1	1	1	1	1	0.7133	1	1	1	0	0.2211	0.4538	0	0.4734	0.5806	0.7465	0.9296	0.9781	1	0.7502	1	1	1	1	1	0.8113	1	1	1
D-AMS 014376	0	0	0	0.001791	0.003008	0.9627	0.9986	0.9993	0.9997	0.9996	0.9999	1	0.3853	0.6464	0.9251	1	1	1	1	1	1	1	1	1	1	0.7172	1	1	1	0	0.23927	0.4799	0.5266	0	0.6067	0.7679	0.94	0.9829	1	0.755	1	1	1	1	1	0.826	1	1	1
D-AMS 021270	0	0	0	0.001299	0.002233	0.9319	0.9962	0.9979	0.9991	0.9988	0.9996	1	0.327	0.5782	0.8904	1	1	1	1	1	1	1	1	1	1	0.7013	1	1	1	0	0.17141	0.3759	0.4194	0.3933	0	0.6751	0.8866	0.957	1	0.7337	1	1	1	1	1	0.757	1	1	0.9999
Beta - 423709	0	0	0	0.000619	0.001074	0.856	0.9895	0.9941	0.9974	0.9964	0.999	1	0.23045	0.4591	0.8137	1	0.9999	1	1	1	1	1	1	1	1	0.6735	1	1	1	0	0.08542	0.22061	0.2535	0.23208	0.3249	0	0.7566	0.8856	1	0.6943	1	1	1	1	1	0.6155	1	1	0.9998
Beta - 423708	0	0	0	8.2e-05	0.000113	0.7152	0.9747	0.9851	0.9927	0.9906	0.997	1	0.11777	0.30262	0.6856	0.9998	0.9997	1	1	1	1	1	1	1	1	0.6362	1	1	1	0	0.015049	0.0569	0.07045	0.05996	0.11338	0.24341	0	0.7203	1	0.6398	1	1	1	0.9998	1	0.399	1	1	0.9995
D-AMS 021269	0	0	0	2e-06	1.5e-05	0.5525	0.9053	0.9182	0.9363	0.9379	0.9572	0.9982	0.07551	0.21123	0.5525	0.993	0.9943	0.999	1	1	1	1	1	1	1	0.6032	1	0.9993	1	0	0.003259	0.016392	0.021879	0.017124	0.04303	0.11439	0.2797	0	1	0.5818	1	1	1	0.9888	1	0.27004	1	0.9987	0.9947
End Acshicupoto	0	0	0	1e-06	6e-06	0.3653	0.7751	0.7879	0.8143	0.8238	0.8585	0.9735	0.03847	0.12647	0.3961	0.963	0.9698	0.9914	0.9968	0.999	0.9986	0.9993	0.9993	0.9996	0.9998	0.5533	1	0.9908	1	0	0	0	0	0	0	0	0	0	0	0.497	1	0.9999	0.9984	0.9393	1	0.14525	0.9962	0.9878	0.9749
Start Hualcayan	0	0.014281	0.024578	0.05321	0.06024	0.4403	0.645	0.6451	0.6665	0.6844	0.7245	0.9315	0.2191	0.30373	0.4587	0.9235	0.9398	0.9871	0.9985	1	0.9994	1	0.9999	1	1	0.5736	1	0.9862	1	0.1642	0.203	0.24183	0.24979	0.24499	0.26625	0.30569	0.3602	0.4182	0.503	0	1	1	1	1	1	0.3408	0.9994	0.9812	0.9542
D-AMS 008213	0	0	0	0	0	0	0	0	0	0	0	0.001512	0	0	0	0	0	0	0	0	0	0	0	0	0.026723	0	0.5824	0	0.9098	0	0	0	0	0	0	0	0	0	0	0	0	6e-06	0	0	1	0	0	0	0
D-AMS 008215	0	0	0	0	0	0	0	0	0	0	0	0.004033	0	0	0	0	0	0	0	0	0.000409	3e-06	0.002707	0.00551	0.15792	0	0.9838	0	0.9978	0	0	0	0	0	0	0	0	0	8.3e-05	0	1	0	0	0	1	0	0	0	0
D-AMS 015768	0	0	0	0	0	0	1e-06	0	2e-06	1e-05	5.6e-05	0.06278	0	0	1e-05	0.012779	0.031126	0.20258	0.30244	0.7552	0.7215	0.8684	0.8766	0.9745	0.9975	0.013746	1	0.10735	1	0	0	0	0	0	0	0	0	0	0.001616	0	1	1	0	9.2e-05	1	0	0.15814	0.06421	0.05523
D-AMS 008216	0	0	0	0	0	0.023579	0.14175	0.13266	0.15568	0.18831	0.24941	0.7073	0.001326	0.005597	0.04914	0.7171	0.7799	0.9471	0.9915	1	0.9973	1	0.9997	1	1	0.3413	1	0.9378	1	0	0	0	0	0	0	1e-06	0.000187	0.011209	0.06069	0	1	1	0.9999	0	1	0.002621	0.9958	0.9188	0.8379
End Hualcayan	0	0	0	0	0	0	0	0	0	0	0	0.000742	0	0	0	0	0	0	0	0	0	0	0	0	0.010939	0	0.23011	0	0.6314	0	0	0	0	0	0	0	0	0	0	0	0	0	0	0	0	0	0	0	0
Start Caral	0	3.5e-05	9.7e-05	0.000885	0.001285	0.7551	0.965	0.9731	0.9811	0.9808	0.9883	0.9998	0.18224	0.3808	0.7274	0.9983	0.9985	0.9997	1	1	1	1	1	1	1	0.6517	1	0.9998	1	0.03846	0.07665	0.16549	0.18875	0.17403	0.24301	0.3845	0.601	0.73	0.8547	0.6592	1	1	1	0.9974	1	0	1	1	1
Beta-132593	0	0	0	0	0	2e-06	0.000168	8.4e-05	0.000156	0.000486	0.001303	0.13999	0	5e-06	0.000142	0.08931	0.16237	0.4885	0.6451	0.9389	0.8917	0.9745	0.9648	0.9975	0.9999	0.06441	1	0.3779	1	0	0	0	0	0	0	0	0	1e-06	0.003789	0.00062	1	1	0.8419	0.004228	1	0	0	0.24221	0.19425
ISGS-4724	0	0	0	0	0	0.002559	0.016281	0.014651	0.017397	0.023067	0.03345	0.2675	0.000144	0.000645	0.006154	0.24057	0.3321	0.6626	0.8021	0.9776	0.9449	0.9919	0.9848	0.9994	1	0.13435	1	0.5787	1	0	0	1e-06	1e-06	1e-06	2e-06	6e-06	4.6e-05	0.001297	0.0122	0.018813	1	1	0.9358	0.08123	1	0	0.7578	0	0.4194
Beta-134427	0	0	0	0	0	0.009183	0.04872	0.04614	0.05317	0.06281	0.08191	0.3497	0.000602	0.002253	0.017473	0.3293	0.4144	0.7133	0.8343	0.9802	0.9534	0.9927	0.9867	0.9993	1	0.17442	1	0.6427	1	0	1e-06	2.3e-05	1.9e-05	2.7e-05	6.7e-05	0.000181	0.000513	0.005262	0.02515	0.04583	1	1	0.9448	0.16206	1	0	0.8058	0.5806	0
ISGS-4738	0	0	0	0	0	0.006001	0.03362	0.031332	0.03647	0.04484	0.06085	0.3192	0.000377	0.001486	0.012081	0.29701	0.3859	0.6984	0.8264	0.9803	0.9513	0.9929	0.9865	0.9994	1	0.15932	1	0.6234	1	0	0	5e-06	8e-06	3e-06	1.6e-05	5.4e-05	0.000179	0.003208	0.019121	0.03405	1	1	0.9435	0.12963	1	0	0.7936	0.5557	0.4741
ISGS-4740	0	0	0	0	0	0.016115	0.08613	0.08186	0.09371	0.11008	0.14193	0.4754	0.000996	0.003857	0.030247	0.4687	0.554	0.818	0.914	0.9936	0.9772	0.9981	0.9947	0.9999	1	0.23742	1	0.7699	1	0	1e-06	3e-05	3.7e-05	2.3e-05	7.7e-05	0.000208	0.000682	0.008872	0.04039	0.07929	1	1	0.9799	0.27192	1	0	0.905	0.7271	0.6403
Beta-132589	0	0	0	0	0	0.014855	0.08258	0.07811	0.09014	0.10768	0.14101	0.492	0.000933	0.003553	0.029194	0.4895	0.5756	0.8374	0.93	0.9957	0.9815	0.9988	0.9959	0.9999	1	0.24572	1	0.7948	1	0	0	9e-06	1.3e-05	9e-06	2.7e-05	8.7e-05	0.000345	0.007972	0.03893	0.07879	1	1	0.9861	0.28009	1	0	0.9239	0.7532	0.6639
ISGS-4710	0	0	0	0	0	0.028008	0.13874	0.13382	0.15098	0.17317	0.21496	0.5789	0.001782	0.006491	0.04897	0.5738	0.6483	0.8702	0.946	0.9967	0.9859	0.9991	0.9968	0.9999	1	0.2865	1	0.8379	1	0	0	7.1e-05	0.000109	7.1e-05	0.000209	0.000613	0.001704	0.016187	0.06147	0.12004	1	1	0.9892	0.3816	1	0	0.9432	0.8046	0.7238
GS-4726	0	0	0	0	1e-06	0.06761	0.27768	0.27297	0.30164	0.3301	0.3887	0.7604	0.005174	0.016935	0.10271	0.7528	0.8016	0.9415	0.9827	0.9993	0.9953	0.9998	0.9992	1	1	0.3775	1	0.9293	1	1.1e-05	4.1e-05	0.000539	0.00074	0.000592	0.001623	0.00431	0.010275	0.04459	0.12336	0.21653	1	1	0.9977	0.5996	1	0	0.9842	0.9115	0.8486
ISGS-4733	0	0	0	2e-06	5e-06	0.15009	0.4379	0.4383	0.4696	0.4957	0.5538	0.8639	0.015231	0.0462	0.18836	0.8511	0.8814	0.9689	0.9928	0.9998	0.9979	0.9999	0.9997	1	1	0.4449	1	0.9643	1	0.000283	0.00081	0.004218	0.005571	0.004445	0.009863	0.0233	0.05013	0.11616	0.22971	0.31286	1	1	0.9992	0.747	1	0	0.9939	0.9532	0.9086
ISGS-4734	0	0	0	5e-06	1e-05	0.16762	0.4517	0.4518	0.4819	0.5068	0.5617	0.8591	0.018202	0.0541	0.20323	0.8463	0.8773	0.9666	0.991	0.9996	0.9974	0.9999	0.9996	1	1	0.4468	1	0.9605	1	0.000614	0.001563	0.006498	0.008044	0.00681	0.013573	0.030764	0.06343	0.13337	0.24795	0.3193	1	1	0.9988	0.7444	1	0	0.992	0.9491	0.9049
Beta-134429	0	0	0	0	1e-06	0.15371	0.5294	0.5322	0.5719	0.6003	0.6673	0.9544	0.012517	0.03997	0.20611	0.929	0.9431	0.989	0.9992	1	0.9996	1	1	1	1	0.4864	1	0.99	1	4e-06	5.3e-05	0.001486	0.002148	0.00157	0.004876	0.013455	0.03289	0.11232	0.24955	0.3695	1	1	1	0.869	1	0	0.9998	0.9848	0.9545
ISGS-4729	0	0	0	2e-06	1e-05	0.21108	0.5479	0.5508	0.5839	0.607	0.6629	0.9241	0.022473	0.06775	0.24991	0.9085	0.9271	0.9837	0.9975	1	0.9992	1	0.9999	1	1	0.487	1	0.9829	1	0.000416	0.001214	0.006679	0.008739	0.007073	0.015685	0.03765	0.07973	0.17015	0.30649	0.3777	1	1	0.9999	0.8365	1	0	0.9985	0.9758	0.9432
ISGS-4732	0	0	0	3e-06	9e-06	0.21146	0.5485	0.5513	0.5837	0.6072	0.6634	0.9244	0.022529	0.06797	0.24971	0.9087	0.9272	0.9838	0.9976	1	0.9992	1	0.9999	1	1	0.4871	1	0.9828	1	0.000411	0.00123	0.006659	0.008851	0.00714	0.015797	0.03741	0.07994	0.16965	0.30647	0.3773	1	1	0.9999	0.8367	1	0	0.9986	0.9758	0.9434
Beta-134428	0	0	0	1e-06	8e-06	0.3689	0.7869	0.7993	0.8257	0.8353	0.8715	0.989	0.03932	0.12292	0.3978	0.9763	0.9806	0.9966	0.9998	1	0.9999	1	1	1	1	0.5598	1	0.9971	1	0.000151	0.000723	0.009145	0.012896	0.009766	0.026078	0.06997	0.15742	0.31424	0.5044	0.5039	1	1	1	0.957	1	0	1	0.9953	0.9841
ISGS-4736	0	0	0	2.3e-05	5.1e-05	0.3968	0.7671	0.7769	0.8012	0.8123	0.8477	0.9775	0.05214	0.14682	0.4185	0.9663	0.9729	0.9946	0.9995	1	0.9998	1	1	1	1	0.5585	1	0.9949	1	0.002615	0.006906	0.024999	0.031214	0.026526	0.04927	0.10357	0.20314	0.3447	0.5179	0.5014	1	1	1	0.9389	1	0	0.9998	0.9921	0.9782
ISGS-4711	0	0	0	3.7e-05	7e-05	0.395	0.7434	0.7517	0.7759	0.7876	0.8235	0.9669	0.05664	0.15223	0.4146	0.9559	0.9651	0.9924	0.999	1	0.9996	1	1	1	1	0.5523	1	0.9924	1	0.004567	0.01092	0.03296	0.0398	0.03505	0.05909	0.1149	0.21345	0.3464	0.5093	0.4912	1	1	1	0.9214	1	0	0.9993	0.9885	0.9719
End Caral	0	0	0	0	0	0	9e-06	2e-06	4e-06	5.7e-05	0.000202	0.09049	0	0	2.6e-05	0.03812	0.07927	0.3266	0.459	0.8404	0.7979	0.9116	0.9124	0.9784	0.9966	0.03174	1	0.21886	1	0	0	0	0	0	0	0	0	0	0.002362	5.8e-05	1	0.9998	0.6707	0.000684	1	0	0	0	0
Start La Galgada	0	0.000652	0.001162	0.002889	0.00337	0.06267	0.12658	0.12398	0.13319	0.14563	0.16956	0.4453	0.021374	0.03496	0.07197	0.4287	0.508	0.7733	0.8779	0.9889	0.9674	0.9964	0.9915	0.9998	1	0.23321	1	0.7153	1	0.012862	0.017138	0.022537	0.023765	0.023012	0.026342	0.03265	0.04245	0.05557	0.0862	0.10456	1	1	0.9661	0.26571	1	0.03961	0.8217	0.6584	0.5858
TK4449	0	0	0	0	0	0.000976	0.006859	0.005992	0.007397	0.0104	0.015673	0.18636	4.1e-05	0.000271	0.002632	0.1458	0.21546	0.5208	0.6651	0.9402	0.8965	0.9739	0.9654	0.9967	0.9997	0.08681	1	0.4197	1	0	0	0	0	0	0	1e-06	1.1e-05	0.000454	0.006913	0.008826	1	1	0.8491	0.04094	1	9.1e-05	0.533	0.3402	0.28748
TK4448	0	0	0	0	0	2e-06	2.6e-05	2e-05	4.2e-05	9.2e-05	0.000202	0.06529	0	2e-06	2.8e-05	0.019302	0.04077	0.20834	0.30158	0.7028	0.6847	0.8104	0.834	0.9397	0.9906	0.017188	1	0.12203	1	0	0	0	0	0	0	0	0	0	0.001696	9.3e-05	1	1	0.475	0.000743	1	0	0.17305	0.07891	0.06691
TX-2463	0	0	0	0	0	0	1e-06	1e-06	0	1e-06	4e-06	0.016803	0	0	1e-06	0.000647	0.001649	0.018773	0.027033	0.13962	0.18286	0.20491	0.29384	0.4233	0.7116	0.000773	0.9988	0.006571	0.9998	0	0	0	0	0	0	0	0	0	0.000418	1e-06	1	0.9625	0.04506	1.5e-05	1	0	0.009723	0.003553	0.003148
TX-2464	0	0	0	0	0	0	0	0	0	0	1e-06	0.012617	0	0	0	0.000112	0.000326	0.007825	0.011013	0.07935	0.11815	0.12453	0.20612	0.3181	0.6259	0.000189	0.9984	0.001828	0.9998	0	0	0	0	0	0	0	0	0	0.000311	1e-06	1	0.9449	0.017921	1e-06	1	0	0.002546	0.000768	0.000733
TX-3166	0	0	0	0	0	4e-05	0.000407	0.000314	0.000394	0.0007	0.001173	0.07643	2e-06	1.5e-05	0.000191	0.03284	0.0603	0.23813	0.3336	0.6944	0.6797	0.7907	0.8187	0.9201	0.9841	0.024592	1	0.15548	1	0	0	0	0	0	0	0	2e-06	1.8e-05	0.00208	0.000672	1	1	0.495	0.003654	1	6e-06	0.21172	0.10849	0.09165
TX-3663	0	0	0	0	0	0	0	0	0	0	0	0.021986	0	0	0	0.000191	0.000827	0.02409	0.03532	0.23328	0.30133	0.3511	0.4721	0.659	0.9107	0.000558	1	0.005541	1	0	0	0	0	0	0	0	0	0	0.000566	0	1	0.9999	0.05989	1e-06	1	0	0.00834	0.00211	0.002237
TX-4446	0	0	0	0	0	0	0	0	0	0	0	0.003035	0	0	0	0	0	1.7e-05	4.1e-05	0.000381	0.001296	0.000748	0.004102	0.007788	0.10523	0	0.8463	1e-06	0.9697	0	0	0	0	0	0	0	0	0	4.5e-05	0	0.8601	0.22589	4.7e-05	0	0.9664	0	1e-06	1e-06	0
TX-4447	0	0	0	0	0	1.1e-05	0.00022	0.000151	0.000204	0.000402	0.00086	0.08043	1e-06	8e-06	0.000109	0.03335	0.06404	0.26079	0.3675	0.7486	0.723	0.8407	0.8581	0.9488	0.9915	0.02626	1	0.16967	1	0	0	0	0	0	0	0	0	2e-06	0.002132	0.000451	1	1	0.5473	0.002782	1	0	0.23218	0.11751	0.09859
End La Galgada	0	0	0	0	0	0	0	0	0	0	0	0.002093	0	0	0	0	0	3e-06	6e-06	9.4e-05	0.000455	0.000209	0.001466	0.002971	0.06064	0	0.6348	0	0.8785	0	0	0	0	0	0	0	0	0	2.7e-05	0	0.5964	0.1112	9e-06	0	0.8313	0	0	1e-06	0
Start Pampa de las Llamas	0	0.000178	0.00034	0.000901	0.001022	0.017591	0.03552	0.03458	0.03716	0.04104	0.04768	0.17732	0.006351	0.010153	0.020486	0.14158	0.18214	0.3815	0.4775	0.7674	0.7543	0.8421	0.8643	0.9428	0.9917	0.08144	1	0.3063	1	0.003986	0.005247	0.006781	0.007128	0.006899	0.007839	0.00957	0.012166	0.015605	0.025586	0.029482	1	1	0.6156	0.07604	1	0.011452	0.3752	0.25783	0.22628
UGa-5796	0	0	0	0	0	0.000178	0.001101	0.001028	0.001279	0.001716	0.002689	0.07031	1e-05	5.5e-05	0.000459	0.03224	0.05394	0.19827	0.27494	0.5993	0.6008	0.6988	0.7462	0.8648	0.9696	0.021978	1	0.12931	1	0	0	0	0	0	0	0	4e-06	7.6e-05	0.002198	0.001449	1	1	0.4064	0.006782	1	2.1e-05	0.17459	0.09319	0.07926
UGa-5462	0	0	0	0	0	0	0	0	0	1e-06	1e-06	0.018172	0	0	1e-06	0.000213	0.000752	0.017103	0.024918	0.1624	0.22011	0.2473	0.3595	0.5228	0.8185	0.000442	0.9998	0.004236	1	0	0	0	0	0	0	0	0	0	0.000485	0	1	0.9943	0.0418	4e-06	1	0	0.006291	0.001831	0.001779
UGa-4506	0	0	0	0	0	0	0	0	0	0	0	0.015938	0	0	0	0.000143	0.000492	0.012479	0.017997	0.12497	0.17729	0.19437	0.29798	0.4436	0.7528	0.000304	0.9994	0.002911	0.9999	0	0	0	0	0	0	0	0	0	0.000419	0	1	0.9832	0.029894	2e-06	1	0	0.004291	0.00124	0.001167
UGa-5797	0	0	0	0	0	0	0	0	0	0	0	0.002963	0	0	0	0	0	1e-06	0	3e-06	0.000208	1.9e-05	0.001166	0.002263	0.09369	0	0.9012	0	0.9838	0	0	0	0	0	0	0	0	0	4.5e-05	0	0.9333	0.19363	0	0	0.9876	0	0	0	0
UGa-5630	0	0	0	0	0	0	0	0	0	0	0	0.002494	0	0	0	0	0	0	0	0	6.3e-05	4e-06	0.000443	0.000852	0.06839	0	0.8414	0	0.9725	0	0	0	0	0	0	0	0	0	2.8e-05	0	0.868	0.09904	0	0	0.9741	0	0	0	0
UGa-5794	0	0	0	0	0	0	0	0	0	0	0	0.002426	0	0	0	0	0	0	0	1e-06	4.6e-05	5e-06	0.00038	0.000683	0.06542	0	0.8308	0	0.9704	0	0	0	0	0	0	0	0	0	2.1e-05	0	0.8563	0.08751	0	0	0.9718	0	0	0	0
UGa-4511	0	0	0	0	0	0	0	0	0	0	0	0.002611	0	0	0	0	0	8e-06	7e-06	0.000107	0.000484	0.000203	0.001694	0.003452	0.0788	0	0.809	1e-06	0.9629	0	0	0	0	0	0	0	0	0	2.9e-05	0	0.8156	0.145	9e-06	0	0.9574	0	0	0	0
UGa-5798	0	0	0	0	0	0	0	0	0	0	0	0.002366	0	0	0	0	0	1e-06	3e-06	3.4e-05	0.000213	5.9e-05	0.0009	0.001849	0.06601	0	0.7834	1e-06	0.9577	0	0	0	0	0	0	0	0	0	2.2e-05	0	0.7864	0.10182	4e-06	0	0.9504	0	0	0	0
UGa-5873	0	0	0	0	0	0	0	0	0	0	0	0.001719	0	0	0	0	0	0	0	0	0	0	1e-06	0	0.03256	0	0.6697	0	0.9379	0	0	0	0	0	0	0	0	0	0	0	0.6492	0.000232	0	0	0.9274	0	0	0	0
End Pampa de las Llamas	0	0	0	0	0	0	0	0	0	0	0	0.001051	0	0	0	0	0	0	0	0	0	0	0	0	0.016133	0	0.3638	0	0.787	0	0	0	0	0	0	0	0	0	0	0	0.22035	2e-06	0	0	0.6792	0	0	0	0
Start Buena Vista	0	0.000191	0.000352	0.000952	0.001153	0.028883	0.06749	0.06533	0.0713	0.08002	0.09663	0.328	0.008596	0.015024	0.03542	0.30031	0.3743	0.6525	0.7723	0.9571	0.9272	0.9786	0.9739	0.9951	0.9996	0.16505	1	0.5777	1	0.004645	0.006358	0.008686	0.009122	0.008879	0.010387	0.013187	0.01763	0.024809	0.04477	0.058	1	1	0.9004	0.16352	1	0.016652	0.6826	0.5122	0.4487
PI-1845	0	0	0	0	0	0	0	0	0	0	0	0.010154	0	0	0	2e-06	1.7e-05	0.002547	0.003382	0.03457	0.06609	0.05984	0.13323	0.22689	0.569	2e-05	0.9989	0.000287	0.9999	0	0	0	0	0	0	0	0	0	0.000244	0	1	0.9628	0.005119	0	1	0	0.000325	5.6e-05	8.7e-05
UGAMS- 3129	0	0	0	0	0	0	0	0	0	0	0	0.008825	0	0	0	0	1e-06	0.00034	0.000358	0.00556	0.030054	0.013513	0.08257	0.16751	0.555	1e-06	0.9997	1.7e-05	1	0	0	0	0	0	0	0	0	0	0.000211	0	1	0.9956	0.000399	0	1	0	1.6e-05	2e-06	1e-06
UGAMS- 3126	0	0	0	0	0	0	0	0	0	0	0	0.008799	0	0	0	0	1e-06	0.000364	0.000341	0.005738	0.030355	0.013641	0.083	0.16774	0.5548	0	0.9997	1.2e-05	1	0	0	0	0	0	0	0	0	0	0.000219	0	1	0.9957	0.00044	0	1	0	2e-05	2e-06	4e-06
UGAMS- 3127	0	0	0	0	0	0	0	0	0	0	0	0.010705	0	0	0	0	2e-06	0.001478	0.001873	0.023386	0.06355	0.04568	0.143	0.2643	0.658	1e-05	0.9999	0.000109	1	0	0	0	0	0	0	0	0	0	0.000266	0	1	0.9995	0.002451	0	1	0	9.5e-05	7e-06	2.2e-05
UGAMS- 3128	0	0	0	0	0	0	0	0	0	0	0	0.018592	0	0	0	0	2.3e-05	0.011337	0.015303	0.16283	0.24423	0.27028	0.412	0.6098	0.9045	0.000105	1	0.001094	1	0	0	0	0	0	0	0	0	0	0.000488	0	1	1	0.022044	0	1	0	0.001064	0.000141	0.000253
GX-30695	0	0	0	0	0	0	0	1e-06	0	3e-06	6e-06	0.03639	0	0	1e-06	0.002356	0.007033	0.08049	0.12288	0.4657	0.4954	0.6046	0.6785	0.8391	0.9712	0.003572	1	0.031589	1	0	0	0	0	0	0	0	0	0	0.000931	0	1	1	0.21479	1.5e-05	1	0	0.0483	0.016159	0.014572
GX-31276	0	0	0	0	0	0.000455	0.00321	0.00274	0.00344	0.004935	0.00759	0.13097	2.6e-05	0.000126	0.001255	0.08467	0.13474	0.3893	0.518	0.8565	0.8179	0.9186	0.9194	0.9779	0.9967	0.05418	1	0.28955	1	0	0	0	1e-06	2e-06	3e-06	6e-06	1.3e-05	0.000202	0.004286	0.00416	1	1	0.7088	0.019929	1	4.6e-05	0.3779	0.22187	0.18752
GX-32177	0	0	0	0	0	0.000652	0.004591	0.004004	0.004861	0.006772	0.010333	0.14352	4.8e-05	0.000211	0.001717	0.09931	0.15188	0.4161	0.5469	0.8735	0.8338	0.9297	0.9286	0.9821	0.9975	0.06188	1	0.3169	1	0	0	1e-06	2e-06	1e-06	2e-06	6e-06	1.9e-05	0.000311	0.005108	0.005705	1	1	0.7369	0.02602	1	6e-05	0.4082	0.24693	0.20857
End Buena Vista	0	0	0	0	0	0	0	0	0	0	0	0.005234	0	0	0	0	0	6e-06	4e-06	0.000132	0.003583	0.00046	0.014829	0.03203	0.26642	0	0.9632	0	0.9901	0	0	0	0	0	0	0	0	0	0.00011	0	0.9686	0.7229	2e-06	0	0.9882	0	0	0	0
Start El Paraiso	0	0.003563	0.005916	0.011931	0.013327	0.06617	0.08885	0.08852	0.09109	0.09392	0.09937	0.17199	0.03832	0.04971	0.06826	0.14976	0.16585	0.24765	0.28528	0.456	0.4867	0.5277	0.6044	0.7292	0.9161	0.09621	1	0.21551	1	0.030969	0.03697	0.04226	0.04349	0.04279	0.04549	0.05068	0.05725	0.06379	0.07467	0.07185	1	1	0.3405	0.11967	1	0.05473	0.24183	0.19711	0.18345
Beta-8704	0	0	0	0	0	0	0	0	0	0	0	0.001245	0	0	0	0	0	0	0	0	0	0	1e-06	1e-06	0.020677	0	0.4326	0	0.8285	0	0	0	0	0	0	0	0	0	2e-06	0	0.3175	0.000686	0	0	0.7338	0	0	0	0
JQ02	0	0	0	0	0	0	0	0	0	0	0	0.008275	0	0	0	0	0	0.000123	0.000112	0.002482	0.021786	0.007287	0.06547	0.13633	0.5162	0	0.9996	2e-06	1	0	0	0	0	0	0	0	0	0	0.000202	0	1	0.9928	9.8e-05	0	1	0	2e-06	1e-06	2e-06
JQ10	0	0	0	0	0	0	0	0	0	0	0	0.010006	0	0	0	0	2e-06	0.000833	0.000988	0.013837	0.05035	0.029531	0.12326	0.23657	0.6371	3e-06	0.9999	4.8e-05	1	0	0	0	0	0	0	0	0	0	0.000254	0	1	0.9995	0.001256	0	1	0	4.1e-05	6e-06	7e-06
End El Paraiso	0	0	0	0	0	0	0	0	0	0	0	0.000689	0	0	0	0	0	0	0	0	0	0	0	1e-06	0.009449	0	0.18565	0	0.5789	0	0	0	0	0	0	0	0	0	0	0	0.10119	0.000138	0	0	0.4383	0	0	0	0
Start Taukachi-Konkan	0	0	0	0	0	0	0	0	0	0	0	0.002881	0	0	0	0	0	0	0	0	1.4e-05	0	0.000147	0.000213	0.08082	0	0.9519	0	0.9933	0	0	0	0	0	0	0	0	0	4e-05	0	1	0.09859	0	0	1	0	0	0	0
Beta-535191	0	0	0	0	0	0	0	0	0	0	0	0.002664	0	0	0	0	0	0	0	0	1e-06	0	4.2e-05	4.1e-05	0.06919	0	0.9378	0	0.9913	0	0	0	0	0	0	0	0	0	3.2e-05	0	0.9998	0.03778	0	0	1	0	0	0	0
Beta-427589	0	0	0	0	0	0	0	0	0	0	0	0.002614	0	0	0	0	0	0	0	0	1e-06	0	2.9e-05	2.9e-05	0.06686	0	0.933	0	0.9906	0	0	0	0	0	0	0	0	0	3.2e-05	0	0.9993	0.028938	0	0	0.9999	0	0	0	0
Beta-427588	0	0	0	0	0	0	0	0	0	0	0	0.002585	0	0	0	0	0	0	0	0	0	0	2.8e-05	2.9e-05	0.06605	0	0.9309	0	0.9903	0	0	0	0	0	0	0	0	0	2.9e-05	0	0.9989	0.02589	0	0	0.9999	0	0	0	0
Beta-427587	0	0	0	0	0	0	0	0	0	0	0	0.002565	0	0	0	0	0	0	0	0	1e-06	0	3e-05	2e-05	0.06498	0	0.9285	0	0.99	0	0	0	0	0	0	0	0	0	2.6e-05	0	0.9984	0.02312	0	0	0.9999	0	0	0	0
Beta-535190	0	0	0	0	0	0	0	0	0	0	0	0.002512	0	0	0	0	0	0	0	0	0	0	2.1e-05	1.2e-05	0.06199	0	0.9197	0	0.9888	0	0	0	0	0	0	0	0	0	2.4e-05	0	0.9957	0.014917	0	0	0.9996	0	0	0	0
Beta-535192	0	0	0	0	0	0	0	0	0	0	0	0.00254	0	0	0	0	0	0	0	0	0	0	2.6e-05	1.5e-05	0.06394	0	0.9258	0	0.9896	0	0	0	0	0	0	0	0	0	2.6e-05	0	0.9977	0.020045	0	0	0.9998	0	0	0	0
Beta-477229	0	0	0	0	0	0	0	0	0	0	0	0.002453	0	0	0	0	0	0	0	0	0	0	1.6e-05	9e-06	0.05971	0	0.9117	0	0.9877	0	0	0	0	0	0	0	0	0	2.2e-05	0	0.9924	0.010064	0	0	0.9993	0	0	0	0
Beta-477227	0	0	0	0	0	0	0	0	0	0	0	0.002643	0	0	0	0	0	0	0	0	0	0	3.9e-05	3.4e-05	0.06847	0	0.9364	0	0.9911	0	0	0	0	0	0	0	0	0	3.1e-05	0	0.9997	0.03525	0	0	1	0	0	0	0
Beta- 477228	0	0	0	0	0	0	0	0	0	0	0	0.002607	0	0	0	0	0	0	0	0	0	0	3.1e-05	2.6e-05	0.06689	0	0.933	0	0.9906	0	0	0	0	0	0	0	0	0	3e-05	0	0.9993	0.029264	0	0	0.9999	0	0	0	0
End Taukachi-Konkan	0	0	0	0	0	0	0	0	0	0	0	0.002315	0	0	0	0	0	0	0	0	0	0	7e-06	3e-06	0.054	0	0.8842	0	0.9835	0	0	0	0	0	0	0	0	0	1.6e-05	0	0.9731	0.003985	0	0	0.9968	0	0	0	0
Start Gramalote	0	0.000256	0.00043	0.000867	0.000931	0.003824	0.004898	0.004876	0.004993	0.005148	0.005396	0.010874	0.002349	0.002992	0.003874	0.007648	0.008343	0.011726	0.013409	0.020324	0.021939	0.02322	0.027676	0.03427	0.10231	0.005092	0.7987	0.01051	0.9657	0.001988	0.002321	0.002613	0.002674	0.002636	0.002779	0.003065	0.003403	0.003701	0.004237	0.00401	0.8182	0.12998	0.015702	0.006315	0.9671	0.003249	0.011582	0.009699	0.009034
Beta-321940	0	0	0	0	0	0	0	0	0	0	0	0.001516	0	0	0	0	0	0	0	0	0	0	0	0	0.02706	0	0.588	0	0.9125	0	0	0	0	0	0	0	0	0	1e-06	0	0.5114	4.5e-05	0	0	0.8802	0	0	0	0
Beta-321943	0	0	0	0	0	0	0	0	0	0	0	0.001672	0	0	0	0	0	0	0	0	0	0	1e-06	1e-06	0.031212	0	0.6478	0	0.9321	0	0	0	0	0	0	0	0	0	1e-06	0	0.6084	0.001103	0	0	0.9161	0	0	0	0
Beta-321945	0	0	0	0	0	0	0	0	0	0	0	0.001537	0	0	0	0	0	0	0	0	0	0	0	0	0.027022	0	0.5883	0	0.9123	0	0	0	0	0	0	0	0	0	1e-06	0	0.5117	5.1e-05	0	0	0.8795	0	0	0	0
End Gramalote	0	0	0	0	0	0	0	0	0	0	0	0.001131	0	0	0	0	0	0	0	0	0	0	0	0	0.01727	0	0.3914	0	0.8003	0	0	0	0	0	0	0	0	0	1e-06	0	0.25344	1e-06	0	0	0.7034	0	0	0	0
Start Chavin	0	0	0	0	0	0.000115	0.000193	0.000199	0.000206	0.000209	0.000221	0.000619	2.4e-05	5.7e-05	0.000128	0.000366	0.000405	0.000564	0.000655	0.000923	0.000968	0.001042	0.001119	0.00133	0.003515	0.000207	0.011452	0.000508	0.25232	2e-06	6e-06	2.1e-05	2.1e-05	2.3e-05	3.2e-05	5.2e-05	8.1e-05	0.000114	0.000148	0.000145	0.0069	0.00283	0.000755	0.000287	0.13056	7.3e-05	0.000568	0.000477	0.000434
AA69448	0	0	0	0	0	0	0	0	0	0	0	7.8e-05	0	0	0	0	0	0	0	0	0	0	0	0	0.000471	0	0	0	0.11298	0	0	0	0	0	0	0	0	0	0	0	0	0	0	0	0.04942	0	0	0	0
AA69449	0	0	0	0	0	0	0	0	0	0	0	8.8e-05	0	0	0	0	0	0	0	0	0	0	0	0	0.000537	0	1e-06	0	0.12564	0	0	0	0	0	0	0	0	0	0	0	0	0	0	0	0.05544	0	0	0	0
AA69446	0	0	0	0	0	0	0	0	0	0	0	0.000122	0	0	0	0	0	0	0	0	0	0	0	0	0.000717	0	8e-06	0	0.15961	0	0	0	0	0	0	0	0	0	0	0	0	0	0	0	0.0724	0	0	0	0
AA69447	0	0	0	0	0	0	0	0	0	0	0	0.000148	0	0	0	0	0	0	0	0	0	0	0	0	0.000934	0	6e-05	0	0.19298	0	0	0	0	0	0	0	0	0	0	0	0	0	0	0	0.08989	0	0	0	0
End Chavin	0	0	0	0	0	0	0	0	0	0	0	5.3e-05	0	0	0	0	0	0	0	0	0	0	0	0	0.000307	0	0	0	0.07955	0	0	0	0	0	0	0	0	0	0	0	0	0	0	0	0.03397	0	0	0	0
End Kotosh Religious Tradition	0	0	0	0	0	0	0	0	0	0	0	0	0	0	0	0	0	0	0	0	0	0	0	0	0	0	0	0	0	0	0	0	0	0	0	0	0	0	0	0	0	0	0	0	0	0	0	0	0
[truncated: 73 more columns]

## Sheet: Model A (only boundaries)
Order	Start Huaricanga	End Huaricanga	Start Huaricoto	End Huaricoto	Start Huaynuna	End Huaynuna	Start Piruro	End Piruro	Start Acshicupoto	End Acshicupoto	Start Shillacoto	End Shillacoto	Start Hualcayan	End Hualcayan	Start Caral	End Caral	Start Kotosh	End Kotosh	Start La Galgada	End La Galgada	Start Pampa de las Llamas	End Pampa de las Llamas	Start Buena Vista	End Buena Vista	Start El Paraiso	End El Paraiso	Start Bahia Seca	End Bahia Seca	Start Taukachi-Konkan	End Taukachi-Konkan	Start Huacaloma	End Huacaloma	Start Gramalote	End Gramalote	Start Chavin	End Chavin
Start Huaricanga	0	1	0.5879	1	0.997	1	0.9929	1	0.9983	1	0.9836	1	0.9828	1	1	1	0.9885	1	0.9976	1	0.889	1	0.9995	1	0.9999	1	0.9998	1	1	1	0.995	1	0.9978	1	1	1
End Huaricanga	0	0	0	1	3e-06	0.9836	0.007902	0.9997	0	0.027459	0.7189	0.9982	0.022811	0.9988	0	0.8988	0.20806	0.9891	1.7e-05	0.9968	0	0.9984	0.4886	0.9906	0.8729	0.9984	0.9697	0.9968	0.9826	0.9977	0.8857	0.9995	0.935	0.9984	0.9985	0.9999
Start Huaricoto	0.4121	1	0	1	0.9935	1	0.9875	1	0.9952	1	0.9784	1	0.9753	1	1	1	0.9834	1	0.9951	1	0.8223	1	0.9992	1	0.9999	1	0.9997	1	1	1	0.9934	1	0.997	1	1	1
End Huaricoto	0	2.9e-05	0	0	0	2.3e-05	0	0.0216	0	0	0	0.03536	0	0.017758	0	0	0	0.004511	0	0.000486	0	0.000126	0	0.000277	0	0.00082	0	0.00137	0	1e-06	0	0.0479	0	0.011263	0	0.08955
Start Huaynuna	0.003033	1	0.00646	1	0	1	0.6265	1	0.25318	0.9885	0.8813	1	0.7372	1	0.7596	1	0.8163	1	0.6369	1	0.026525	1	0.9781	1	0.9975	1	0.997	1	1	1	0.9599	1	0.9805	1	0.9997	1
End Huaynuna	0	0.016361	0	1	0	0	0	0.9995	0	0.00023	0.3871	0.9841	0	0.9952	0	0.001634	6.1e-05	0.7309	0	0.9689	0	0.993	2.5e-05	0.768	0.021603	0.9932	0.6486	0.9727	0.4863	0.9884	0.6899	0.9987	0.7655	0.9923	0.995	0.9999
Start Piruro	0.007136	0.9921	0.012541	1	0.3735	1	0	1	0.21703	0.8534	0.8642	1	0.631	1	0.5366	1	0.7441	1	0.4729	1	0.04181	1	0.9514	1	0.9947	1	0.996	1	1	1	0.9528	1	0.9765	1	0.9997	1
End Piruro	0	0.00035	0	0.9784	0	0.00051	0	0	0	3e-06	1.9e-05	0.22875	0	0.17267	0	0	0	0.04352	0	0.016366	0	0.016392	0	0.004251	0	0.03362	0	0.018281	0	0.001113	0.001099	0.4197	1.3e-05	0.10327	0.387	0.8685
Start Acshicupoto	0.001697	1	0.004848	1	0.7468	1	0.783	1	0	1	0.9022	1	0.8223	1	0.9759	1	0.8769	1	0.8455	1	0.024353	1	0.9896	1	0.9988	1	0.9979	1	1	1	0.9678	1	0.9846	1	0.9998	1
End Acshicupoto	0	0.9725	0	1	0.011518	0.9998	0.14657	1	0	0	0.8113	1	0.3503	1	0.006758	0.9979	0.5491	0.9999	0.03658	1	0	1	0.8835	0.9999	0.9857	1	0.9928	1	0.9998	1	0.9315	1	0.9652	1	0.9995	1
Start Shillacoto	0.016428	0.28112	0.021619	1	0.1187	0.6129	0.13581	1	0.0978	0.18866	0	1	0.15557	0.9967	0.14162	0.3615	0.19574	0.7672	0.13199	0.9476	0.04794	0.9954	0.26225	0.7299	0.3872	0.9952	0.6596	0.9489	0.5943	0.9876	0.7414	0.9997	0.7831	0.9929	0.9962	1
End Shillacoto	0	0.001765	0	0.9646	0	0.015911	0	0.7713	0	2e-05	0	0	0	0.5476	0	2e-06	0	0.15986	0	0.2727	0	0.4291	0	0.05204	1.7e-05	0.4485	0.0122	0.23249	0.0038	0.3265	0.15124	0.7272	0.10059	0.4611	0.729	0.8807
Start Hualcayan	0.017236	0.9772	0.024675	1	0.26282	1	0.369	1	0.17774	0.6497	0.8444	1	0	1	0.3525	1	0.6547	1	0.3227	1	0.0623	1	0.9128	1	0.9905	1	0.9945	1	1	1	0.9445	1	0.972	1	0.9996	1
End Hualcayan	0	0.001188	0	0.9822	0	0.004757	0	0.8273	0	1.4e-05	0.003253	0.4524	0	0	0	0	0	0.12054	0	0.15638	0	0.3256	0	0.022466	0	0.3579	0	0.10608	0	0.15049	0.07442	0.7599	0.010435	0.3676	0.7851	0.9298
Start Caral	2e-06	1	3.6e-05	1	0.24039	1	0.4634	1	0.024052	0.9932	0.8584	1	0.6475	1	0	1	0.7531	1	0.4125	1	0.000122	1	0.9674	1	0.9963	1	0.9961	1	1	1	0.9512	1	0.9759	1	0.9997	1
End Caral	0	0.10116	0	1	0	0.9984	4e-06	1	0	0.002071	0.6385	1	0	1	0	0	0.026333	0.9949	0	1	0	1	0.05486	0.9999	0.6502	1	0.9603	1	0.995	1	0.8467	1	0.9124	1	0.9985	1
Start Kotosh	0.011506	0.7919	0.016563	1	0.18367	0.9999	0.25591	1	0.12313	0.4509	0.8043	1	0.3453	1	0.24691	0.9737	0	1	0.22594	1	0.04247	1	0.7523	1	0.957	1	0.99	1	0.9997	1	0.9264	1	0.9615	1	0.9994	1
End Kotosh	0	0.010878	0	0.9955	0	0.26909	0	0.9565	0	0.000126	0.23285	0.8401	0	0.8795	0	0.005073	0	0	0	0.7401	0	0.8389	0.000216	0.4392	0.021911	0.8452	0.3499	0.7277	0.24639	0.7936	0.4962	0.9408	0.5166	0.8455	0.9419	0.9821
Start La Galgada	0.002445	1	0.004881	1	0.3631	1	0.5271	1	0.15452	0.9634	0.868	1	0.6773	1	0.5875	1	0.7741	1	0	1	0.01815	1	0.9694	1	0.9966	1	0.9964	1	1	1	0.9547	1	0.9777	1	0.9997	1
End La Galgada	0	0.003165	0	0.9995	0	0.031072	0	0.9836	0	3.1e-05	0.05236	0.7273	0	0.8436	0	1.2e-05	0	0.25988	0	0	0	0.7702	0	0.09754	1.7e-05	0.7821	0.026212	0.4316	0.008172	0.6337	0.28819	0.959	0.20452	0.7607	0.9665	0.9973
Start Pampa de las Llamas	0.11105	1	0.17775	1	0.9735	1	0.9582	1	0.9756	1	0.9521	1	0.9377	1	0.9999	1	0.9575	1	0.9819	1	0	1	0.9976	1	0.9998	1	0.9992	1	1	1	0.9849	1	0.993	1	0.9999	1
End Pampa de las Llamas	0	0.001633	0	0.9999	0	0.007034	0	0.9836	0	1.7e-05	0.004571	0.5709	0	0.6744	0	0	0	0.16114	0	0.22976	0	0	0	0.03206	0	0.5372	0	0.15165	0	0.22369	0.1145	0.9317	0.013706	0.5077	0.9596	0.999
Start Buena Vista	0.000489	0.5114	0.000782	1	0.021874	1	0.04855	1	0.010407	0.11646	0.7378	1	0.08719	1	0.03256	0.9451	0.24769	0.9998	0.030628	1	0.002352	1	0	1	0.9086	1	0.983	1	0.9996	1	0.8968	1	0.9446	1	0.9991	1
End Buena Vista	0	0.009387	0	0.9997	0	0.23197	0	0.9957	0	0.000114	0.27009	0.948	0	0.9775	0	9.8e-05	0	0.5608	0	0.9025	0	0.9679	0	0	0.00117	0.9695	0.3992	0.9071	0.19818	0.9519	0.5954	0.9923	0.649	0.9671	0.9887	0.9987
Start El Paraiso	5.5e-05	0.12712	8.9e-05	1	0.002489	0.9784	0.005304	1	0.001182	0.014294	0.6128	1	0.009509	1	0.003729	0.3498	0.04298	0.9781	0.003449	1	0.00025	1	0.09135	0.9988	0	1	0.9429	1	0.9706	1	0.8318	1	0.9005	1	0.9982	1
End El Paraiso	0	0.001584	0	0.9992	0	0.006808	0	0.9664	0	1.8e-05	0.004831	0.5515	0	0.6421	0	0	0	0.15485	0	0.21788	0	0.4628	0	0.03052	0	0	0	0.14476	0	0.21695	0.10767	0.9053	0.016101	0.4835	0.9408	0.9952
Start Bahia Seca	0.000218	0.03028	0.000295	1	0.002955	0.3514	0.004019	1	0.002108	0.007232	0.3404	0.9878	0.005459	1	0.003921	0.03969	0.009997	0.6501	0.003605	0.9738	0.000762	1	0.016955	0.6008	0.05706	1	0	1	0.31464	1	0.6672	1	0.7435	1	0.9952	1
End Bahia Seca	0	0.003243	0	0.9986	0	0.027327	0	0.9817	0	3.5e-05	0.05106	0.7675	0	0.8939	0	0	0	0.27228	0	0.5684	0	0.8484	0	0.09293	0	0.8552	0	0	0.000922	0.758	0.3277	0.9663	0.24128	0.8366	0.9658	0.9941
Start Taukachi-Konkan	0	0.017427	0	1	1e-06	0.5137	1e-06	1	0	0.000232	0.4057	0.9962	5e-06	1	2e-06	0.005049	0.000253	0.7536	3e-06	0.9918	0	1	0.000351	0.8018	0.029375	1	0.6854	0.9991	0	1	0.7106	1	0.7958	1	0.9961	1
End Taukachi-Konkan	0	0.002274	0	1	0	0.011595	0	0.9989	0	2.6e-05	0.012381	0.6735	0	0.8495	0	0	0	0.20642	0	0.3663	0	0.7763	0	0.04812	0	0.7831	0	0.24198	0	0	0.20454	0.982	0.04851	0.7168	0.9807	1
Start Huacaloma	0.004991	0.11434	0.006641	1	0.04007	0.31006	0.04718	0.9989	0.0322	0.06849	0.25856	0.8488	0.0555	0.9256	0.04877	0.15326	0.07358	0.5038	0.04526	0.7118	0.015078	0.8855	0.10316	0.4046	0.16821	0.8923	0.3328	0.6723	0.2894	0.7955	0	1	0.4726	0.8756	0.989	1
End Huacaloma	0	0.000526	0	0.9521	0	0.001286	0	0.5803	0	7e-06	0.000315	0.27279	0	0.24013	0	0	0	0.05919	0	0.04099	0	0.06833	0	0.007675	0	0.09472	0	0.03371	0	0.017964	0	0	0.000773	0.15182	0.5081	0.8175
Start Gramalote	0.002243	0.06502	0.003015	1	0.01954	0.23453	0.023467	1	0.015427	0.03481	0.2169	0.8994	0.027971	0.9896	0.024054	0.08762	0.03848	0.4834	0.022276	0.7955	0.006973	0.9863	0.05535	0.351	0.09948	0.9839	0.25654	0.7587	0.2042	0.9515	0.5274	0.9992	0	1	0.9918	1
End Gramalote	0	0.001624	0	0.9887	0	0.007702	0	0.8967	0	1.8e-05	0.007083	0.5389	0	0.6324	0	0	0	0.15453	0	0.23926	0	0.4923	0	0.03294	0	0.5165	2.4e-05	0.16338	0	0.2832	0.12436	0.8482	0	0	0.8643	0.9571
Start Chavin	3e-05	0.001457	3.9e-05	1	0.000273	0.004993	0.000336	0.613	0.000218	0.000522	0.003829	0.27105	0.000406	0.21488	0.000348	0.001508	0.000592	0.05806	0.000328	0.03348	9.7e-05	0.04042	0.0009	0.011328	0.001757	0.05917	0.004841	0.03424	0.003944	0.019341	0.011011	0.4919	0.008203	0.13573	0	1
End Chavin	0	0.000119	0	0.9104	0	0.000103	0	0.13153	0	1e-06	0	0.11928	0	0.0702	0	0	0	0.017946	0	0.002731	0	0.000991	0	0.001252	0	0.004767	0	0.005874	0	9e-06	0	0.18253	0	0.0429	0	0

## Sheet: Model D (only bondaries)
Order	Start Huaricanga	End Huaricanga	Start Huaynuna	End Huaynuna	Start Piruro	End Piruro	Start Acshicupoto	End Acshicupoto	Start Hualcayan	End Hualcayan	Start Caral	End Caral	Start La Galgada	End La Galgada	Start Pampa de las Llamas	End Pampa de las Llamas	Start Buena Vista	End Buena Vista	Start El Paraiso	End El Paraiso	Start Taukachi-Konkan	End Taukachi-Konkan	Start Gramalote	End Gramalote	Start Chavin	End Chavin
Start Huaricanga	0	1	0.9942	1	0.9717	1	0.998	1	0.9857	1	1	1	0.9993	1	0.9998	1	0.9998	1	0.9964	1	1	1	0.9997	1	1	1
End Huaricanga	0	0	0.000233	0.9912	0.24198	0.9994	0	0.026493	0.06846	0.9993	0.000194	0.9095	0.5547	0.9979	0.8227	0.9989	0.672	0.9948	0.828	0.9993	0.9971	0.9977	0.9891	0.9989	0.9994	0.9999
Start Huaynuna	0.005766	0.9998	0	1	0.7456	1	0.3437	0.9615	0.7809	1	0.8178	1	0.9786	1	0.9936	1	0.9914	1	0.9617	1	1	1	0.9977	1	1	1
End Huaynuna	0	0.008847	0	0	6e-06	0.9914	0	0.000218	0	0.9891	0	0.003397	0	0.9394	0.008275	0.9839	0.000363	0.7336	0.08389	0.9906	0.9192	0.946	0.8977	0.9827	0.9965	0.9997
Start Piruro	0.028311	0.758	0.25442	1	0	1	0.21406	0.4467	0.4264	1	0.3483	0.9683	0.7668	1	0.9186	1	0.835	1	0.9038	1	1	1	0.9949	1	0.9998	1
End Piruro	0	0.000566	0	0.00856	0	0	0	0	0	0.3686	0	1e-06	0	0.12147	0	0.21304	0	0.009853	0	0.4211	0.006687	0.016508	0.03431	0.19967	0.7477	0.9204
Start Acshicupoto	0.002012	1	0.6563	1	0.7859	1	0	1	0.8358	1	0.9615	1	0.9871	1	0.996	1	0.9954	1	0.969	1	1	1	0.998	1	1	1
End Acshicupoto	0	0.9735	0.03847	0.9998	0.5533	1	0	0	0.497	1	0.14525	0.9976	0.9138	1	0.9744	1	0.9552	0.9999	0.9253	1	1	1	0.9958	1	0.9999	1
Start Hualcayan	0.014281	0.9315	0.2191	1	0.5736	1	0.1642	0.503	0	1	0.3408	0.9999	0.8954	1	0.9705	1	0.942	1	0.9281	1	1	1	0.996	1	0.9999	1
End Hualcayan	0	0.000742	0	0.010939	0	0.6314	0	0	0	0	0	0	0	0.16871	0	0.3208	0	0.011825	0	0.5617	0	0.003156	0.03293	0.2966	0.8694	0.966
Start Caral	3.5e-05	0.9998	0.18224	1	0.6517	1	0.03846	0.8547	0.6592	1	0	1	0.9604	1	0.9885	1	0.9833	1	0.9453	1	1	1	0.9968	1	0.9999	1
End Caral	0	0.09049	0	0.9966	0.03174	1	0	0.002362	5.8e-05	1	0	0	0.0861	0.9999	0.492	1	0.1874	0.9995	0.7004	1	1	1	0.986	1	0.9993	1
Start La Galgada	0.000652	0.4453	0.021374	1	0.23321	1	0.012862	0.0862	0.10456	1	0.03961	0.9139	0	1	0.8155	1	0.6278	1	0.8375	1	1	1	0.9918	1	0.9996	1
End La Galgada	0	0.002093	0	0.06064	0	0.8785	0	2.7e-05	0	0.8313	0	5.2e-05	0	0	1.5e-05	0.7486	0	0.09361	0.00053	0.8568	0.22226	0.3347	0.3791	0.729	0.9767	0.9966
Start Pampa de las Llamas	0.000178	0.17732	0.006351	0.9917	0.08144	1	0.003986	0.025586	0.029482	1	0.011452	0.508	0.18448	1	0	1	0.26945	1	0.6868	1	1	1	0.9856	1	0.9993	1
End Pampa de las Llamas	0	0.001051	0	0.016133	0	0.787	0	0	0	0.6792	0	0	0	0.25135	0	0	0	0.017647	0	0.7398	0	0.006146	0.05591	0.4625	0.9725	0.997
Start Buena Vista	0.000191	0.328	0.008596	0.9996	0.16505	1	0.004645	0.04477	0.058	1	0.016652	0.8126	0.3722	1	0.7306	1	0	1	0.8	1	1	1	0.9903	1	0.9995	1
End Buena Vista	0	0.005234	0	0.26642	0	0.9901	0	0.00011	0	0.9882	0	0.000484	0	0.9064	2.8e-05	0.9824	0	0	0.002365	0.9897	0.8812	0.9285	0.8616	0.9807	0.9961	0.9997
Start El Paraiso	0.003563	0.17199	0.03832	0.9161	0.09621	1	0.030969	0.07467	0.07185	1	0.05473	0.29956	0.1625	0.9995	0.31322	1	0.20004	0.9976	0	1	1	1	0.9778	1	0.999	1
End El Paraiso	0	0.000689	0	0.009449	0	0.5789	0	0	0	0.4383	0	0	0	0.14321	0	0.26024	0	0.010323	0	0	0.000872	0.006136	0.03143	0.24278	0.8417	0.9595
Start Taukachi-Konkan	0	0.002881	0	0.08082	0	0.9933	0	4e-05	0	1	0	7e-06	0	0.7777	0	1	0	0.11877	1e-06	0.9991	0	1	0.7751	1	0.9964	1
End Taukachi-Konkan	0	0.002315	0	0.054	0	0.9835	0	1.6e-05	0	0.9968	0	0	0	0.6653	0	0.9939	0	0.0715	0	0.9939	0	0	0.6176	0.9929	0.9957	1
Start Gramalote	0.000256	0.010874	0.002349	0.10231	0.005092	0.9657	0.001988	0.004237	0.00401	0.9671	0.003249	0.013954	0.008165	0.6209	0.014376	0.9441	0.009708	0.13845	0.022192	0.9686	0.22494	0.3824	0	1	0.9953	1
End Gramalote	0	0.001131	0	0.01727	0	0.8003	0	1e-06	0	0.7034	0	0	0	0.27103	0	0.5375	0	0.01927	0	0.7572	0	0.007095	0	0	0.9675	0.9947
Start Chavin	0	0.000619	2.4e-05	0.003515	0.000207	0.25232	2e-06	0.000148	0.000145	0.13056	7.3e-05	0.000673	0.000401	0.023265	0.00069	0.027532	0.000466	0.003895	0.000954	0.15826	0.003576	0.004311	0.004711	0.03253	0	1
End Chavin	0	5.3e-05	0	0.000307	0	0.07955	0	0	0	0.03397	0	0	0	0.003421	0	0.002962	0	0.000288	0	0.04052	0	0	0	0.005318	0	0
