# Supplementary material for: Time, Ritual, and Bayesian Reasoning: Charting the Andean Kotosh Religious Tradition
Source: Research Square preprint supplement (doi:10.21203/rs.3.rs-6896121/v1), 2025-07-18
Supplement: Supplementary file 5 [file fd2cfc20019c71f8b6534bdd.xlsx]

## Sheet: Model A
		m	from_95.4	to_95.4	c
1	Difference Huaricanga and Caral Start	-645	-976	-417	99.7
2	Difference Huaricanga and Kotosh Start	-885	-1442	-137	99.8
3	Difference Huaricanga and La Galgada Start	-623	-1016	-239	99.8
4	Difference Huaricanga and Huaricoto Start	-6	-335	324	99.9
5	Difference Huaricanga and Piruro Start	-653	-1120	-130	99.8
6	Difference Huaricanga and Chavin Start	-2362	-2759	-1984	99.7
7	Difference Huaricanga and Acshicupoto Start	-486	-844	-187	99.8
8	Difference Huaricanga and Hualcayan Start	-765	-1226	-55	99.9
9	Difference Huaricanga and Gramalote Start	-1841	-2270	-1385	99.5
10	Difference Caral and Kotosh Start	-228	-701	487	99.5
11	Difference Caral and La Galgada Start	24	-229	372	99.7
12	Difference Caral and Piruro Start	2	-368	486	99.6
13	Difference Caral and Huaricoto Start	648	342	1019	99.8
14	Difference Caral and Chavin Start	-1723	-1940	-1372	99.4
15	Difference Caral and Acshicupoto Start	162	-44	408	99.5
16	Difference Caral and Hualcayan Start	-116	-451	570	99.8
17	Difference Caral and Gramalote Start	-1199	-1448	-767	99.4
18	Difference Kotosh and La Galgada Start	261	-515	822	99.6
19	Difference Kotosh and Huaricoto Start	875	98	1458	99.8
20	Difference Kotosh and Piruro Start	232	-584	904	99.7
21	Difference Kotosh and Chavin Start	-1480	-2295	-934	99.5
22	Difference Kotosh and Acshicupoto Start	396	-346	907	99.6
23	Difference Kotosh and Hualcayan Start	133	-708	971	99.7
24	Difference Kotosh and Gramalote Start	-955	-1827	-357	99.4
25	Difference La Galgada and Huaricoto Start	618	191	1053	99.8
26	Difference La Galgada and Piruro Start	-29	-505	509	99.7
27	Difference La Galgada and Chavin Start	-1741	-2165	-1334	99.7
28	Difference La Galgada and Acshicupoto Start	138	-240	455	99.7
29	Difference La Galgada and Hualcayan Start	-142	-619	603	99.8
30	Difference La Galgada and Gramalote Start	-1220	-1683	-727	99.7
31	Difference Huaricoto and Piruro Start	-644	-1145	-90	99.9
32	Difference Huaricoto and Chavin Start	-2360	-2799	-1942	99.7
33	Difference Huaricoto and Acshicupoto Start	-482	-880	-122	99.9
34	Difference Huaricoto and Hualcayan Start	-751	-1247	-20	99.9
35	Difference Huaricoto and Gramalote Start	-1837	-2309	-1333	99.6
36	Difference Huaricanga and Huacaloma Start	-1819	-2419	-578	99.8
37	Difference Caral and Huacaloma Start	-1169	-1631	67	99.5
38	Difference Kotosh and Huacaloma Start	-917	-1910	398	99.5
39	Difference La Galgada and Huacaloma Start	-1196	-1807	93	99.7
40	Difference Huaricoto and Huacaloma Start	-1806	-2449	-559	99.8
41	Difference Gramalote and Huacaloma Start	19	-666	1446	99.4
42	Difference Huaricanga and El Paraiso Start	-1337	-1744	-936	99.8
43	Difference Caral and El Paraiso Start	-687	-944	-329	99.4
44	Difference Kotosh and El Paraiso Start	-451	-1236	127	99.5
45	Difference La Galgada and El Paraiso Start	-714	-1137	-290	99.7
46	Difference Huaricoto and El Paraiso Start	-1331	-1774	-884	99.8
47	Difference Gramalote and El Paraiso Start	506	-1	990	99.4
48	Difference Huaricanga and Buena Vista Start	-1108	-1516	-714	99.7
49	Difference Caral and Buena Vista Start	-457	-733	-106	99.3
50	Difference Kotosh and Buena Vista Start	-224	-1010	350	99.5
51	Difference La Galgada and Buena Vista Start	-484	-908	-64	99.6
52	Difference Huaricoto and Buena Vista Start	-1102	-1550	-664	99.8
53	Difference Gramalote and Buena Vista Start	736	225	1203	99.4
54	Difference Chavin and Huacaloma Start	542	-54	1926	99.3
55	Difference Huaricanga and Pampa de las Llamas Start	-136	-509	156	99.8
56	Difference Caral and Pampa de las Llamas Start	514	265	796	99.7
57	Difference Kotosh and Pampa de las Llamas Start	740	-11	1273	99.7
58	Difference La Galgada and Pampa de las Llamas Start	483	89	838	99.8
59	Difference Huaricoto and Pampa de las Llamas Start	-129	-536	215	99.8
60	Difference Gramalote and Pampa de las Llamas Start	1704	1239	2090	99.8
61	Difference Huaricanga and Caral End	-231	-481	152	99.5
62	Difference Huaricanga and Kotosh End	-666	-1485	-87	99.6
63	Difference Huaricanga and La Galgada End	-865	-1316	-393	99.6
64	Difference Huaricanga and Huaricoto End	-1805	-2208	-1334	99.9
65	Difference Huaricanga and Piruro End	-1379	-1802	-919	99.7
66	Difference Huaricanga and Chavin End	-1576	-1966	-1157	99.7
67	Difference Huaricanga and Acshicupoto End	253	-50	672	99.4
68	Difference Huaricanga and Hualcayan End	-1082	-1806	-591	99.8
69	Difference Huaricanga and Gramalote End	-975	-1476	-487	99.7
70	Difference Caral and Kotosh End	-444	-1184	-21	99.5
71	Difference Caral and La Galgada End	-640	-1006	-333	99.6
72	Difference Caral and Piruro End	-1153	-1506	-852	99.8
73	Difference Caral and Huaricoto End	-1590	-1905	-1245	99.8
74	Difference Caral and Chavin End	-1348	-1655	-1120	99.6
75	Difference Caral and Acshicupoto End	487	258	680	99
76	Difference Caral and Hualcayan End	-855	-1483	-533	99.8
77	Difference Caral and Gramalote End	-740	-1153	-498	99.5
78	Difference Kotosh and La Galgada End	-194	-764	609	99.6
79	Difference Kotosh and Huaricoto End	-1125	-1675	-352	99.9
80	Difference Kotosh and Piruro End	-706	-1253	76	99.7
81	Difference Kotosh and Chavin End	-908	-1429	-139	99.7
82	Difference Kotosh and Acshicupoto End	925	465	1681	99.4
83	Difference Kotosh and Hualcayan End	-424	-1223	408	99.8
84	Difference Kotosh and Gramalote End	-309	-899	533	99.6
85	Difference La Galgada and Huaricoto End	-939	-1365	-476	99.9
86	Difference La Galgada and Piruro End	-512	-950	-65	99.8
87	Difference La Galgada and Chavin End	-711	-1115	-298	99.8
88	Difference La Galgada and Acshicupoto End	1123	780	1514	99.6
89	Difference La Galgada and Hualcayan End	-224	-933	268	99.8
90	Difference La Galgada and Gramalote End	-107	-604	353	99.6
91	Difference Huaricoto and Piruro End	425	-1	817	99.9
92	Difference Huaricoto and Chavin End	213	-100	574	99.9
93	Difference Huaricoto and Acshicupoto End	2070	1704	2410	99.8
94	Difference Huaricoto and Hualcayan End	702	40	1149	99.9
95	Difference Huaricoto and Gramalote End	833	348	1239	99.9
96	Difference Huaricanga and Huacaloma End	-1327	-1950	-800	99.8
97	Difference Caral and Huacaloma End	-1108	-1655	-701	99.8
98	Difference Kotosh and Huacaloma End	-655	-1388	169	99.8
99	Difference La Galgada and Huacaloma End	-465	-1089	61	99.8
100	Difference Huaricoto and Huacaloma End	456	-64	942	99.9
101	Difference Gramalote and Huacaloma End	-353	-990	179	99.8
102	Difference Huaricanga and El Paraiso End	-1012	-1431	-562	99.6
103	Difference Caral and El Paraiso End	-784	-1113	-525	99.5
104	Difference Kotosh and El Paraiso End	-342	-883	441	99.6
105	Difference La Galgada and El Paraiso End	-146	-575	292	99.7
106	Difference Huaricoto and El Paraiso End	794	362	1193	99.9
107	Difference Gramalote and El Paraiso End	-38	-465	439	99.6
108	Difference Huaricanga and Buena Vista End	-632	-993	-188	99.6
109	Difference Caral and Buena Vista End	-397	-680	-192	99.6
110	Difference Kotosh and Buena Vista End	39	-457	825	99.6
111	Difference La Galgada and Buena Vista End	237	-143	653	99.7
112	Difference Huaricoto and Buena Vista End	1182	791	1543	99.9
113	Difference Gramalote and Buena Vista End	343	-31	815	99.7
114	Difference Chavin and Huacaloma End	245	-325	725	99.9
115	Difference Huaricanga and Pampa de las Llamas End	-1011	-1363	-587	99.7
116	Difference Caral and Pampa de las Llamas End	-778	-1053	-565	99.7
117	Difference Kotosh and Pampa de las Llamas End	-340	-831	431	99.6
118	Difference La Galgada and Pampa de las Llamas End	-142	-517	264	99.8
119	Difference Huaricoto and Pampa de las Llamas End	802	411	1160	99.9
120	Difference Gramalote and Pampa de las Llamas End	-37	-397	415	99.7
121	Difference Bahia Seca and Acshicupoto End	1091	787	1513	99.5
122	Difference Bahia Seca and Hualcayan End	-241	-975	248	99.8
123	Difference Bahia Seca and Gramalote End	-135	-647	348	99.6
124	Difference Huaynuna and Acshicupoto End	790	505	1102	99.6
125	Difference Huaynuna and Hualcayan End	-550	-1236	-136	99.8
126	Difference Huaynuna and Gramalote End	-439	-907	-61	99.6
127	Difference Taukachi-Konkan and Acshicupoto End	1196	954	1419	99.2
128	Difference Taukachi-Konkan and Hualcayan End	-144	-784	201	99.8
129	Difference Taukachi-Konkan and Gramalote End	-31	-450	250	99.5

## Sheet: Model B
		m	from_95.4	to_95.4	c
1	Difference Huaricanga and Caral Start	-568	-844	-332	99.8
2	Difference Huaricanga and Kotosh Start	-1112	-1629	-33	99.8
3	Difference Huaricanga and La Galgada Start	-525	-866	-117	99.9
4	Difference Huaricanga and Huaricoto Start	-2188	-2910	-138	99.7
5	Difference Huaricanga and Piruro Start	-985	-1370	-479	99.8
6	Difference Huaricanga and Chavin Start	-2302	-2636	-1962	99.9
7	Difference Huaricanga and Acshicupoto Start	-411	-708	-116	99.8
8	Difference Huaricanga and Hualcayan Start	-694	-1070	-45	99.9
9	Difference Huaricanga and Gramalote Start	-1770	-2145	-1319	99.7
10	Difference Caral and Kotosh Start	-546	-1044	506	99.7
11	Difference Caral and La Galgada Start	42	-221	425	99.8
12	Difference Caral and Piruro Start	-417	-725	58	99.7
13	Difference Caral and Huaricoto Start	-1623	-2308	393	99.4
14	Difference Caral and Chavin Start	-1735	-1955	-1412	99.4
15	Difference Caral and Acshicupoto Start	157	-55	405	99.6
16	Difference Caral and Hualcayan Start	-130	-455	491	99.8
17	Difference Caral and Gramalote Start	-1204	-1460	-768	99.5
18	Difference Kotosh and La Galgada Start	594	-501	1205	99.8
19	Difference Kotosh and Huaricoto Start	-1054	-2436	1033	99.7
20	Difference Kotosh and Piruro Start	135	-1010	808	99.8
21	Difference Kotosh and Chavin Start	-1176	-2296	-636	99.7
22	Difference Kotosh and Acshicupoto Start	706	-357	1242	99.8
23	Difference Kotosh and Hualcayan Start	427	-715	1227	99.8
24	Difference Kotosh and Gramalote Start	-641	-1807	-40	99.7
25	Difference La Galgada and Huaricoto Start	-1669	-2439	370	99.6
26	Difference La Galgada and Piruro Start	-461	-938	73	99.8
27	Difference La Galgada and Chavin Start	-1771	-2217	-1402	99.7
28	Difference La Galgada and Acshicupoto Start	115	-285	435	99.8
29	Difference La Galgada and Hualcayan Start	-173	-658	500	99.8
30	Difference La Galgada and Gramalote Start	-1241	-1730	-765	99.7
31	Difference Huaricoto and Piruro Start	1209	-859	2040	99.6
32	Difference Huaricoto and Chavin Start	-100	-2199	624	99.1
33	Difference Huaricoto and Acshicupoto Start	1783	-230	2504	99.5
34	Difference Huaricoto and Hualcayan Start	1498	-563	2448	99.7
35	Difference Huaricoto and Gramalote Start	437	-1685	1184	99.3
36	Difference Huaricanga and Huacaloma Start	-1592	-2155	-203	99.8
37	Difference Caral and Huacaloma Start	-1026	-1542	338	99.5
38	Difference Kotosh and Huacaloma Start	-462	-1757	1002	99.7
39	Difference La Galgada and Huacaloma Start	-1071	-1715	335	99.7
40	Difference Huaricoto and Huacaloma Start	595	-1577	2195	99.5
41	Difference Gramalote and Huacaloma Start	164	-456	1690	99.5
42	Difference Huaricanga and El Paraiso Start	-1355	-1724	-876	99.8
43	Difference Caral and El Paraiso Start	-790	-1045	-337	99.5
44	Difference Kotosh and El Paraiso Start	-224	-1381	400	99.7
45	Difference La Galgada and El Paraiso Start	-825	-1305	-326	99.7
46	Difference Huaricoto and El Paraiso Start	855	-1246	1629	99.4
47	Difference Gramalote and El Paraiso Start	414	-126	1003	99.6
48	Difference Huaricanga and Buena Vista Start	-1017	-1363	-641	99.8
49	Difference Caral and Buena Vista Start	-449	-717	-112	99.6
50	Difference Kotosh and Buena Vista Start	98	-1006	681	99.7
51	Difference La Galgada and Buena Vista Start	-493	-935	-86	99.8
52	Difference Huaricoto and Buena Vista Start	1175	-853	1932	99.4
53	Difference Gramalote and Buena Vista Start	750	257	1198	99.4
54	Difference Chavin and Huacaloma Start	697	133	2153	99.6
55	Difference Huaricanga and Pampa de las Llamas Start	-1204	-1504	-930	99.5
56	Difference Caral and Pampa de las Llamas Start	-634	-859	-413	99.2
57	Difference Kotosh and Pampa de las Llamas Start	-94	-1150	439	99.7
58	Difference La Galgada and Pampa de las Llamas Start	-682	-1076	-375	99.7
59	Difference Huaricoto and Pampa de las Llamas Start	982	-1044	1692	99.2
60	Difference Gramalote and Pampa de las Llamas Start	566	124	871	99.1
61	Difference Huaricanga and Caral End	-238	-482	121	99.4
62	Difference Huaricanga and Kotosh End	-767	-1744	-188	99.7
63	Difference Huaricanga and La Galgada End	-889	-1370	-435	99.7
64	Difference Huaricanga and Huaricoto End	-1660	-2123	-1254	99.6
65	Difference Huaricanga and Piruro End	-1401	-1798	-970	99.9
66	Difference Huaricanga and Chavin End	-1560	-1910	-1174	99.8
67	Difference Huaricanga and Acshicupoto End	244	-52	626	99.4
68	Difference Huaricanga and Hualcayan End	-1083	-1729	-632	99.8
69	Difference Huaricanga and Gramalote End	-983	-1455	-544	99.7
70	Difference Caral and Kotosh End	-539	-1453	-50	99.7
71	Difference Caral and La Galgada End	-656	-1057	-333	99.6
72	Difference Caral and Piruro End	-1167	-1506	-871	99.7
73	Difference Caral and Huaricoto End	-1430	-1816	-1160	99.6
74	Difference Caral and Chavin End	-1322	-1604	-1110	99.6
75	Difference Caral and Acshicupoto End	485	252	676	99.1
76	Difference Caral and Hualcayan End	-850	-1414	-536	99.8
77	Difference Caral and Gramalote End	-743	-1135	-499	99.4
78	Difference Kotosh and La Galgada End	-115	-747	866	99.8
79	Difference Kotosh and Huaricoto End	-890	-1476	26	99.9
80	Difference Kotosh and Piruro End	-621	-1204	323	99.9
81	Difference Kotosh and Chavin End	-788	-1323	126	99.8
82	Difference Kotosh and Acshicupoto End	1018	505	1945	99.7
83	Difference Kotosh and Hualcayan End	-323	-1080	676	99.8
84	Difference Kotosh and Gramalote End	-218	-808	774	99.8
85	Difference La Galgada and Huaricoto End	-777	-1268	-311	99.7
86	Difference La Galgada and Piruro End	-509	-944	-38	99.9
87	Difference La Galgada and Chavin End	-670	-1062	-236	99.8
88	Difference La Galgada and Acshicupoto End	1137	785	1561	99.7
89	Difference La Galgada and Hualcayan End	-200	-850	310	99.8
90	Difference La Galgada and Gramalote End	-94	-581	394	99.8
91	Difference Huaricoto and Piruro End	260	-81	700	99.8
92	Difference Huaricoto and Chavin End	87	-160	482	99.7
93	Difference Huaricoto and Acshicupoto End	1908	1607	2321	99.6
94	Difference Huaricoto and Hualcayan End	572	-15	1043	99.8
95	Difference Huaricoto and Gramalote End	676	240	1144	99.7
96	Difference Huaricanga and Huacaloma End	-1161	-1848	-655	99.8
97	Difference Caral and Huacaloma End	-934	-1542	-529	99.8
98	Difference Kotosh and Huacaloma End	-387	-1206	622	99.8
99	Difference La Galgada and Huacaloma End	-277	-975	283	99.8
100	Difference Huaricoto and Huacaloma End	493	-84	1015	99.9
101	Difference Gramalote and Huacaloma End	-177	-881	340	99.9
102	Difference Huaricanga and El Paraiso End	-971	-1491	-523	99.7
103	Difference Caral and El Paraiso End	-735	-1186	-448	99.7
104	Difference Kotosh and El Paraiso End	-205	-850	790	99.7
105	Difference La Galgada and El Paraiso End	-84	-620	413	99.8
106	Difference Huaricoto and El Paraiso End	689	195	1175	99.8
107	Difference Gramalote and El Paraiso End	12	-522	492	99.8
108	Difference Huaricanga and Buena Vista End	-620	-955	-213	99.7
109	Difference Caral and Buena Vista End	-377	-646	-175	99.6
110	Difference Kotosh and Buena Vista End	151	-375	1098	99.8
111	Difference La Galgada and Buena Vista End	273	-105	719	99.7
112	Difference Huaricoto and Buena Vista End	1042	715	1474	99.7
113	Difference Gramalote and Buena Vista End	363	19	812	99.7
114	Difference Chavin and Huacaloma End	393	-219	850	99.9
115	Difference Huaricanga and Pampa de las Llamas End	-935	-1175	-581	99.6
116	Difference Caral and Pampa de las Llamas End	-694	-880	-521	99.2
117	Difference Kotosh and Pampa de las Llamas End	-158	-644	753	99.8
118	Difference La Galgada and Pampa de las Llamas End	-40	-358	363	99.7
119	Difference Huaricoto and Pampa de las Llamas End	732	468	1118	99.6
120	Difference Gramalote and Pampa de las Llamas End	46	-195	443	99.7
121	Difference Bahia Seca and Acshicupoto End	1090	789	1497	99.6
122	Difference Bahia Seca and Hualcayan End	-234	-888	235	99.8
123	Difference Bahia Seca and Gramalote End	-136	-621	327	99.7
124	Difference Huaynuna and Acshicupoto End	804	505	1163	99.5
125	Difference Huaynuna and Hualcayan End	-528	-1162	-91	99.8
126	Difference Huaynuna and Gramalote End	-425	-892	-10	99.6
127	Difference Taukachi-Konkan and Acshicupoto End	1121	902	1307	98.8
128	Difference Taukachi-Konkan and Hualcayan End	-210	-779	85	99.7
129	Difference Taukachi-Konkan and Gramalote End	-105	-501	130	99.4

## Sheet: Model C
					m	from_95.4	to_95.4	c
1	Difference Huaricanga and Caral Start				-633	-959	-389	99.6
2	Difference Huaricanga and Kotosh Start				-641	-1966	176	99.8
3	Difference Huaricanga and La Galgada Start				-938	-1334	-520	99.8
4	Difference Huaricanga and Piruro Start				-474	-938	49	99.9
5	Difference Huaricanga and Chavin Start				-2339	-2693	-2054	99.7
6	Difference Huaricanga and Acshicupoto Start				-436	-777	-140	99.6
7	Difference Huaricanga and Hualcayan Start				-721	-1143	-44	99.9
8	Difference Huaricanga and Gramalote Start				-1794	-2205	-1353	99.9
9	Difference Caral and Kotosh Start				0	-1347	898	99.7
10	Difference Caral and La Galgada Start				-302	-586	80	99.6
11	Difference Caral and Piruro Start				165	-264	692	99.8
12	Difference Caral and Chavin Start				-1708	-1923	-1443	99.2
13	Difference Caral and Acshicupoto Start				199	-25	456	99.5
14	Difference Caral and Hualcayan Start				-86	-425	560	99.8
15	Difference Caral and Gramalote Start				-1162	-1429	-734	99.6
16	Difference Kotosh and La Galgada Start				-276	-1220	1089	99.7
17	Difference Kotosh and Piruro Start				197	-836	1585	99.8
18	Difference Kotosh and Chavin Start				-1694	-2600	-333	99.6
19	Difference Kotosh and Acshicupoto Start				209	-701	1562	99.6
20	Difference Kotosh and Hualcayan Start				-16	-1037	1370	99.8
21	Difference Kotosh and Gramalote Start				-1127	-2065	242	99.7
22	Difference La Galgada and Piruro Start				458	-75	1052	99.8
23	Difference La Galgada and Chavin Start				-1401	-1826	-1060	99.6
24	Difference La Galgada and Acshicupoto Start				503	99	835	99.7
25	Difference La Galgada and Hualcayan Start				216	-275	928	99.8
26	Difference La Galgada and Gramalote Start				-855	-1349	-358	99.6
27	Difference Piruro and Chavin Start				-1864	-2414	-1415	99.8
28	Difference Piruro and Acshicupoto Start				39	-503	498	99.8
29	Difference Piruro and Hualcayan Start				-228	-886	493	99.9
30	Difference Piruro and Gramalote Start				-1311	-1930	-768	99.8
31	Difference Chavin and Acshicupoto Start				1903	1625	2183	99.4
32	Difference Chavin and Hualcayan Start				1614	1247	2310	99.8
33	Difference Chavin and Gramalote Start				544	178	1023	98.9
34	Difference Huaricanga and El Paraiso Start				-1229	-1695	-603	99.9
35	Difference Caral and El Paraiso Start				-592	-939	22	99.6
36	Difference Kotosh and El Paraiso Start				-534	-1537	865	99.7
37	Difference La Galgada and El Paraiso Start				-290	-813	389	99.6
38	Difference Gramalote and El Paraiso Start				562	0	1315	99.6
39	Difference Huaricanga and Buena Vista Start				-1056	-1455	-667	99.8
40	Difference Caral and Buena Vista Start				-419	-712	-55	99.4
41	Difference Kotosh and Buena Vista Start				-398	-1341	973	99.7
42	Difference La Galgada and Buena Vista Start				-118	-569	314	99.6
43	Difference Gramalote and Buena Vista Start				738	243	1194	99.4
44	Difference Huaricanga and Pampa de las Llamas Start				-1210	-1613	-808	99.8
45	Difference Caral and Pampa de las Llamas Start				-571	-875	-204	99.5
46	Difference Kotosh and Pampa de las Llamas Start				-553	-1509	812	99.7
47	Difference La Galgada and Pampa de las Llamas Start				-273	-726	165	99.6
48	Difference Gramalote and Pampa de las Llamas Start				584	102	1052	99.3
49	Difference Huaricanga and Caral End				-195	-466	176	99.5
50	Difference Huaricanga and Kotosh End				-647	-1697	715	99.7
51	Difference Huaricanga and La Galgada End				-858	-1318	-399	99.7
52	Difference Huaricanga and Piruro End				-1077	-1620	-600	99.9
53	Difference Huaricanga and Chavin End				-1514	-1809	-1134	99.8
54	Difference Huaricanga and Acshicupoto End				247	-55	637	99.5
55	Difference Huaricanga and Hualcayan End				-1069	-1622	-634	99.8
56	Difference Huaricanga and Gramalote End				-977	-1423	-549	99.7
57	Difference Caral and Kotosh End				-475	-1492	860	99.6
58	Difference Caral and La Galgada End				-668	-1061	-330	99.6
59	Difference Caral and Piruro End				-891	-1373	-512	99.8
60	Difference Caral and Chavin End				-1317	-1557	-1105	99.4
61	Difference Caral and Acshicupoto End				444	201	670	99.1
62	Difference Caral and Hualcayan End				-879	-1363	-564	99.8
63	Difference Caral and Gramalote End				-782	-1153	-514	99.4
64	Difference Kotosh and La Galgada End				-208	-1578	860	99.7
65	Difference Kotosh and Piruro End				-440	-1827	670	99.7
66	Difference Kotosh and Chavin End				-843	-2175	128	99.7
67	Difference Kotosh and Acshicupoto End				914	-421	1935	99.6
68	Difference Kotosh and Hualcayan End				-441	-1812	650	99.8
69	Difference Kotosh and Gramalote End				-327	-1680	711	99.7
70	Difference La Galgada and Piruro End				-222	-779	282	99.8
71	Difference La Galgada and Chavin End				-651	-994	-250	99.9
72	Difference La Galgada and Acshicupoto End				1110	759	1518	99.7
73	Difference La Galgada and Hualcayan End				-217	-778	253	99.9
74	Difference La Galgada and Gramalote End				-119	-575	329	99.8
75	Difference Piruro and Chavin End				-428	-795	40	99.9
76	Difference Piruro and Acshicupoto End				1331	947	1826	99.8
77	Difference Piruro and Hualcayan End				1	-572	566	99.9
78	Difference Piruro and Gramalote End				100	-365	635	99.9
79	Difference Chavin and Acshicupoto End				1761	1523	2010	99.8
80	Difference Chavin and Hualcayan End				441	-33	751	99.9
81	Difference Chavin and Gramalote End				536	158	823	99.8
82	Difference Huaricanga and El Paraiso End				-1060	-1570	-620	99.8
83	Difference Caral and El Paraiso End				-871	-1310	-542	99.8
84	Difference Kotosh and El Paraiso End				-421	-1792	665	99.7
85	Difference La Galgada and El Paraiso End				-205	-725	269	99.8
86	Difference Gramalote and El Paraiso End				-83	-584	354	99.8
87	Difference Huaricanga and Buena Vista End				-638	-992	-220	99.7
88	Difference Caral and Buena Vista End				-442	-735	-202	99.6
89	Difference Kotosh and Buena Vista End				22	-1321	1047	99.7
90	Difference La Galgada and Buena Vista End				223	-164	653	99.8
91	Difference Gramalote and Buena Vista End				340	-3	760	99.8
92	Difference Huaricanga and Pampa de las Llamas End				-970	-1320	-563	99.7
93	Difference Caral and Pampa de las Llamas End				-774	-1060	-530	99.5
94	Difference Kotosh and Pampa de las Llamas End				-309	-1651	719	99.7
95	Difference La Galgada and Pampa de las Llamas End				-108	-491	313	99.8
96	Difference Gramalote and Pampa de las Llamas End				8	-330	414	99.8
97	Difference Huaynuna and Acshicupoto End				791	505	1104	99.6
98	Difference Huaynuna and Hualcayan End				-530	-1051	-149	99.8
99	Difference Huaynuna and Gramalote End				-435	-853	-79	99.7
100	Difference Taukachi-Konkan and Acshicupoto End				1054	848	1183	99.1
101	Difference Taukachi-Konkan and Hualcayan End				-268	-721	-21	99.8
102	Difference Taukachi-Konkan and Gramalote End				-169	-515	2	99.4

## Sheet: Model D
						m	from_95.4	to_95.4	c
1	Difference Huaricanga and Caral Start					-614	-925	-358	99.6
2	Difference Huaricanga and La Galgada Start					-990	-1374	-557	99.7
3	Difference Huaricanga and Piruro Start					-766	-1241	24	99.7
4	Difference Huaricanga and Chavin Start					-2325	-2653	-2057	99.5
5	Difference Huaricanga and Acshicupoto Start					-429	-750	-130	99.6
6	Difference Huaricanga and Hualcayan Start					-712	-1104	-39	99.7
7	Difference Huaricanga and Gramalote Start					-1783	-2168	-1404	99.6
8	Difference Caral and La Galgada Start					-375	-666	26	99.3
9	Difference Caral and Piruro Start					-153	-605	642	99.5
10	Difference Caral and Chavin Start					-1712	-1920	-1470	99.1
11	Difference Caral and Acshicupoto Start					185	-37	444	99
12	Difference Caral and Hualcayan Start					-100	-430	532	99.5
13	Difference Caral and Gramalote Start					-1170	-1429	-805	99
14	Difference La Galgada and Piruro Start					214	-359	1077	99.6
15	Difference La Galgada and Chavin Start					-1331	-1773	-1019	99
16	Difference La Galgada and Acshicupoto Start					563	149	900	99.2
17	Difference La Galgada and Hualcayan Start					275	-223	978	99.4
18	Difference La Galgada and Gramalote Start					-790	-1293	-354	99
19	Difference Piruro and Chavin Start					-1550	-2366	-1099	99.5
20	Difference Piruro and Acshicupoto Start					344	-458	829	99.5
21	Difference Piruro and Hualcayan Start					69	-840	820	99.6
22	Difference Piruro and Gramalote Start					-1004	-1876	-484	99.5
23	Difference Chavin and Acshicupoto Start					1893	1650	2160	98.7
24	Difference Chavin and Hualcayan Start					1605	1265	2277	99.4
25	Difference Chavin and Gramalote Start					541	233	945	98.6
26	Difference Huaricanga and El Paraiso Start					-1305	-1753	-485	99.7
27	Difference Caral and El Paraiso Start					-694	-1020	119	99.3
28	Difference La Galgada and El Paraiso Start					-313	-862	574	99.3
29	Difference Gramalote and El Paraiso Start					470	-13	1435	99
30	Difference Huaricanga and Buena Vista Start					-1046	-1425	-660	99.6
31	Difference Caral and Buena Vista Start					-430	-736	-67	99
32	Difference La Galgada and Buena Vista Start					-58	-523	377	98.9
33	Difference Gramalote and Buena Vista Start					735	311	1165	98.6
34	Difference Huaricanga and Pampa de las Llamas Start					-1167	-1563	-734	99.6
35	Difference Caral and Pampa de las Llamas Start					-551	-873	-155	98.9
36	Difference La Galgada and Pampa de las Llamas Start					-180	-670	294	99
37	Difference Gramalote and Pampa de las Llamas Start					614	172	1096	99
38	Difference Huaricanga and Caral End					-210	-480	129	99.3
39	Difference Huaricanga and La Galgada End					-870	-1332	-429	99.3
40	Difference Huaricanga and Piruro End					-1178	-1699	-699	99.7
41	Difference Huaricanga and Chavin End					-1520	-1795	-1175	99.6
42	Difference Huaricanga and Acshicupoto End					244	-40	597	98.8
43	Difference Huaricanga and Hualcayan End					-1072	-1608	-666	99.5
44	Difference Huaricanga and Gramalote End					-980	-1375	-587	99.2
45	Difference Caral and La Galgada End					-663	-1075	-316	99.3
46	Difference Caral and Piruro End					-977	-1452	-560	99.7
47	Difference Caral and Chavin End					-1307	-1538	-1095	99.6
48	Difference Caral and Acshicupoto End					456	221	681	99.1
49	Difference Caral and Hualcayan End					-866	-1344	-555	99.6
50	Difference Caral and Gramalote End					-768	-1102	-507	99.5
51	Difference La Galgada and Piruro End					-310	-868	228	99.7
52	Difference La Galgada and Chavin End					-644	-990	-235	99.6
53	Difference La Galgada and Acshicupoto End					1118	768	1528	99.3
54	Difference La Galgada and Hualcayan End					-209	-764	271	99.6
55	Difference La Galgada and Gramalote End					-108	-542	344	99.4
56	Difference Piruro and Chavin End					-329	-732	104	99.8
57	Difference Piruro and Acshicupoto End					1431	1012	1907	99.8
58	Difference Piruro and Hualcayan End					93	-486	647	99.8
59	Difference Piruro and Gramalote End					199	-266	710	99.7
60	Difference Chavin and Acshicupoto End					1764	1538	1997	99.5
61	Difference Chavin and Hualcayan End					445	-25	735	99.8
62	Difference Chavin and Gramalote End					539	207	810	99.8
63	Difference Huaricanga and El Paraiso End					-1117	-1628	-691	99.6
64	Difference Caral and El Paraiso End					-912	-1364	-561	99.6
65	Difference La Galgada and El Paraiso End					-250	-786	243	99.7
66	Difference Gramalote and El Paraiso End					-138	-635	275	99.6
67	Difference Huaricanga and Buena Vista End					-646	-979	-269	99.2
68	Difference Caral and Buena Vista End					-435	-713	-193	99.3
69	Difference La Galgada and Buena Vista End					226	-159	665	99.5
70	Difference Gramalote and Buena Vista End					334	8	706	99.4
71	Difference Huaricanga and Pampa de las Llamas End					-992	-1358	-609	99.3
72	Difference Caral and Pampa de las Llamas End					-781	-1090	-527	99.6
73	Difference La Galgada and Pampa de las Llamas End					-120	-530	315	99.5
74	Difference Gramalote and Pampa de las Llamas End					-11	-360	368	99.6
75	Difference Huaynuna and Acshicupoto End					807	518	1156	99.2
76	Difference Huaynuna and Hualcayan End					-513	-1048	-114	99.6
77	Difference Huaynuna and Gramalote End					-418	-815	-37	99.4
78	Difference Taukachi-Konkan and Acshicupoto End					1066	869	1188	98.4
79	Difference Taukachi-Konkan and Hualcayan End					-256	-702	-20	99.7
80	Difference Taukachi-Konkan and Gramalote End					-159	-466	2	99.3
